# Supplementary material for: Unveiling the DHX15 - G-patch Interplay in Retroviral RNA Packaging
Source: Research Square preprint supplement (doi:10.21203/rs.3.rs-4201688/v1), 2024-04-02
Supplement: Supplementary file 1 [file 62a9b561be4c906546860b8b.xlsx]

## Sheet: legend
list	content
all proteins	raw data table obtained by MaxQuant software as proteinGroups.txt file
WT	proteins identified in M-PMV WT samples; the number of samples from total nine in which the LFQ intensity was assign to the protein was calculated in column "count"; proteins identified only by site, as reverse or as potential contamination were removed.
dG-patch	proteins identified in M-PMV dG-patch samples; the number of samples from total nine in which the LFQ intensity was assign to the protein was calculated in column "count"; proteins identified only by site, as reverse or as potential contamination were removed.
mock	proteins identified in samples obtained from non-infected cells; the number of samples from total three in which the LFQ intensity was assign to the protein was calculated in column "count"; proteins identified only by site, as reverse or as potential contamination were removed.
dG-patch_to_WT	output matrix obtained by Perseus software (version 1.6.5.0); proteins identified only by site, matching to the reverse database, marked as potential contaminants or identified in mock samples were excluded from the analysis; for remaining proteins: LFQ intensity values were transformed to a logarithmic scale using log2(x); missing data were replaced by the values of the noise from a normal distr…

## Sheet: all_proteins
Protein IDs	Majority protein IDs	Peptide counts (all)	Peptide counts (razor+unique)	Peptide counts (unique)	Protein names	Gene names	Fasta headers	Number of proteins	Peptides	Razor + unique peptides	Unique peptides	Peptides dG-patch_1-1	Peptides dG-patch_1-2	Peptides dG-patch_1-3	Peptides dG-patch_2-1	Peptides dG-patch_2-2	Peptides dG-patch_2-3	Peptides dG-patch_3-1	Peptides dG-patch_3-2	Peptides dG-patch_3-3	Peptides mock_1	Peptides mock_2	Peptides mock_3	Peptides WT_1-1	Peptides WT_1-2	Peptides WT_1-3	Peptides WT_2-1	Peptides WT_2-2	Peptides WT_2-3	Peptides WT_3-1	Peptides WT_3-2	Peptides WT_3-3	Razor + unique peptides dG-patch_1-1	Razor + unique peptides dG-patch_1-2	Razor + unique peptides dG-patch_1-3	Razor + unique peptides dG-patch_2-1	Razor + unique peptides dG-patch_2-2	Razor + unique peptides dG-patch_2-3	Razor + unique peptides dG-patch_3-1	Razor + unique peptides dG-patch_3-2	Razor + unique peptides dG-patch_3-3	Razor + unique peptides mock_1	Razor + unique peptides mock_2	Razor + unique peptides mock_3	Razor + unique peptides WT_1-1	Razor + unique peptides WT_1-2	Razor + unique peptides WT_1-3	Razor + unique peptides WT_2-1	Razor + unique peptides WT_2-2
A0A024R571;Q9H4M9;C9JC03;C9J2Z4;C9JDQ8;C9JIJ3;C9IZH1	A0A024R571;Q9H4M9;C9JC03;C9J2Z4	17;17;14;13;8;3;3	15;15;12;11;6;3;3	9;9;6;7;3;1;1	EH domain-containing protein 1	EHD1	tr|A0A024R571|A0A024R571_HUMAN EH domain-containing protein 1 OS=Homo sapiens OX=9606 GN=EHD1 PE=1 SV=1;sp|Q9H4M9|EHD1_HUMAN EH domain-containing protein 1 OS=Homo sapiens OX=9606 GN=EHD1 PE=1 SV=2;tr|C9JC03|C9JC03_HUMAN EH domain-containing protein 1 (Fra	7	17	15	9	3	3	1	0	0	0	0	0	0	0	0	0	4	9	11	6	6	5	1	3	2	3	3	1	0	0	0	0	0	0	0	0	0	3	8	11	6	4
A0A087WT15;A0A096LP10	A0A087WT15;A0A096LP10	1;1	1;1	1;1		ALG13	tr|A0A087WT15|A0A087WT15_HUMAN N-acetylglucosaminyldiphosphodolichol N-acetylglucosaminyltransferase OS=Homo sapiens OX=9606 GN=ALG13 PE=1 SV=1;tr|A0A096LP10|A0A096LP10_HUMAN N-acetylglucosaminyldiphosphodolichol N-acetylglucosaminyltransferase (Fragment)	2	1	1	1	0	0	0	0	0	0	0	0	0	0	0	0	1	0	0	0	0	1	1	0	0	0	0	0	0	0	0	0	0	0	0	0	0	1	0	0	0	0
A0A087WTA8;P08123	A0A087WTA8;P08123	1;1	1;1	1;1	Collagen alpha-2(I) chain	COL1A2	tr|A0A087WTA8|A0A087WTA8_HUMAN Collagen alpha-2(I) chain OS=Homo sapiens OX=9606 GN=COL1A2 PE=1 SV=1;sp|P08123|CO1A2_HUMAN Collagen alpha-2(I) chain OS=Homo sapiens OX=9606 GN=COL1A2 PE=1 SV=7	2	1	1	1	0	0	0	0	0	0	0	1	0	0	0	0	0	0	0	0	0	0	0	0	0	0	0	0	0	0	0	0	1	0	0	0	0	0	0	0	0	0
A0A087WTS8;D6RJ96;A0A087WYC1;A0A0A0MSM0;E9PDE8;O95757;P34932;Q92598	A0A087WTS8;D6RJ96;A0A087WYC1;A0A0A0MSM0;E9PDE8;O95757;P34932;Q92598	1;1;1;1;1;1;1;1	1;1;1;1;1;1;1;1	1;1;1;1;1;1;1;1	Heat shock 70 kDa protein 4L;Heat shock 70 kDa protein 4;Heat shock protein 105 kDa	HSPA4;HSPA4L;HSPH1	tr|A0A087WTS8|A0A087WTS8_HUMAN Heat shock 70 kDa protein 4 OS=Homo sapiens OX=9606 GN=HSPA4 PE=1 SV=1;tr|D6RJ96|D6RJ96_HUMAN Heat shock 70 kDa protein 4L (Fragment) OS=Homo sapiens OX=9606 GN=HSPA4L PE=1 SV=1;tr|A0A087WYC1|A0A087WYC1_HUMAN Heat shock 70 kD	8	1	1	1	1	0	0	0	1	1	0	0	0	0	0	0	0	0	0	0	0	0	0	0	0	1	0	0	0	1	1	0	0	0	0	0	0	0	0	0	0	0
A0A087WTT1;P11940;E7EQV3;E7ERJ7;H0YAR2;E5RGH3;E5RJB9;Q9H361;H0YBN4;E5RH24;H0YB86;E5RHG7;H0YEQ8;H0YAP2;Q4VXU2;E5RGC4;E5RFD8;A0A6I8PS38;A0A6I8PLA1;Q5JQF8	A0A087WTT1;P11940;E7EQV3;E7ERJ7;H0YAR2	13;13;12;11;7;6;6;6;5;4;4;3;3;3;2;1;1;1;1;1	13;13;12;11;7;6;6;6;5;4;4;3;3;3;2;1;1;1;1;1	6;6;5;6;5;1;1;4;2;1;2;1;0;3;1;1;1;0;0;1	Polyadenylate-binding protein;Polyadenylate-binding protein 1	PABPC1	tr|A0A087WTT1|A0A087WTT1_HUMAN Polyadenylate-binding protein OS=Homo sapiens OX=9606 GN=PABPC1 PE=1 SV=1;sp|P11940|PABP1_HUMAN Polyadenylate-binding protein 1 OS=Homo sapiens OX=9606 GN=PABPC1 PE=1 SV=2;tr|E7EQV3|E7EQV3_HUMAN Polyadenylate-binding protein	20	13	13	6	8	9	3	1	3	2	1	0	0	0	0	0	7	7	8	6	5	5	5	5	3	8	9	3	1	3	2	1	0	0	0	0	0	7	7	8	6	5
A0A087WUA0;P02671	A0A087WUA0;P02671	1;1	1;1	1;1	Fibrinogen alpha chain;Fibrinopeptide A;Fibrinogen alpha chain	FGA	tr|A0A087WUA0|A0A087WUA0_HUMAN Fibrinopeptide A OS=Homo sapiens OX=9606 GN=FGA PE=1 SV=1;sp|P02671|FIBA_HUMAN Fibrinogen alpha chain OS=Homo sapiens OX=9606 GN=FGA PE=1 SV=2	2	1	1	1	0	0	0	0	0	0	0	0	1	0	0	0	0	0	0	0	0	0	0	0	0	0	0	0	0	0	0	0	0	1	0	0	0	0	0	0	0	0
A0A087WVF7;Q9NZM3;E7EPJ2;H7BZD4	A0A087WVF7;Q9NZM3	22;22;8;1	20;20;8;1	20;20;8;1	Intersectin-2	ITSN2	tr|A0A087WVF7|A0A087WVF7_HUMAN Intersectin-2 OS=Homo sapiens OX=9606 GN=ITSN2 PE=1 SV=1;sp|Q9NZM3|ITSN2_HUMAN Intersectin-2 OS=Homo sapiens OX=9606 GN=ITSN2 PE=1 SV=3	4	22	20	20	6	4	4	1	1	1	2	1	0	0	0	0	9	9	10	9	6	4	6	6	3	6	4	4	1	1	1	2	1	0	0	0	0	8	7	9	7	4
A0A087WVQ6;Q00610;J3KS13;A0A087WX41;P53675;K7EJJ5;J3KSQ2;J3QL20;F5H5N6	A0A087WVQ6;Q00610	28;28;10;5;5;3;2;1;1	28;28;10;5;5;3;2;1;1	28;28;10;5;5;3;2;1;1	Clathrin heavy chain;Clathrin heavy chain 1	CLTC	tr|A0A087WVQ6|A0A087WVQ6_HUMAN Clathrin heavy chain OS=Homo sapiens OX=9606 GN=CLTC PE=1 SV=1;sp|Q00610|CLH1_HUMAN Clathrin heavy chain 1 OS=Homo sapiens OX=9606 GN=CLTC PE=1 SV=5	9	28	28	28	9	8	3	5	5	7	5	0	0	3	3	10	7	8	15	9	4	3	5	5	3	9	8	3	5	5	7	5	0	0	3	3	10	7	8	15	9	4
A0A087WWF8;F8VV13;Q96DR8	A0A087WWF8;F8VV13;Q96DR8	1;1;1	1;1;1	1;1;1	Mucin-like protein 1	MUCL1	tr|A0A087WWF8|A0A087WWF8_HUMAN Mucin-like protein 1 OS=Homo sapiens OX=9606 GN=MUCL1 PE=1 SV=1;tr|F8VV13|F8VV13_HUMAN Mucin-like protein 1 OS=Homo sapiens OX=9606 GN=MUCL1 PE=1 SV=1;sp|Q96DR8|MUCL1_HUMAN Mucin-like protein 1 OS=Homo sapiens OX=9606 GN=MUCL	3	1	1	1	0	0	0	0	0	0	0	0	0	0	1	0	0	0	1	0	0	0	0	0	0	0	0	0	0	0	0	0	0	0	0	1	0	0	0	1	0	0
A0A087WWY3;Q60FE5;P21333;F8WE98;A0A669KBC6;O75369;Q14315	A0A087WWY3;Q60FE5;P21333	13;13;13;4;1;1;1	13;13;13;4;1;1;1	13;13;13;4;1;1;1	Filamin-A	FLNA	tr|A0A087WWY3|A0A087WWY3_HUMAN Filamin-A OS=Homo sapiens OX=9606 GN=FLNA PE=1 SV=1;tr|Q60FE5|Q60FE5_HUMAN Filamin-A OS=Homo sapiens OX=9606 GN=FLNA PE=1 SV=1;sp|P21333|FLNA_HUMAN Filamin-A OS=Homo sapiens OX=9606 GN=FLNA PE=1 SV=4	7	13	13	13	6	4	2	4	1	1	10	1	0	0	0	0	0	0	0	0	0	0	0	0	0	6	4	2	4	1	1	10	1	0	0	0	0	0	0	0	0	0
A0A087WY55;Q9NP79;Q5TGM0	A0A087WY55;Q9NP79;Q5TGM0	7;7;4	7;7;4	7;7;4	Vacuolar protein sorting-associated protein VTA1 homolog	VTA1	tr|A0A087WY55|A0A087WY55_HUMAN Chromosome 6 open reading frame 55, isoform CRA_b OS=Homo sapiens OX=9606 GN=VTA1 PE=1 SV=1;sp|Q9NP79|VTA1_HUMAN Vacuolar protein sorting-associated protein VTA1 homolog OS=Homo sapiens OX=9606 GN=VTA1 PE=1 SV=1;tr|Q5TGM0|Q5T	3	7	7	7	3	4	3	1	2	2	2	0	0	0	0	1	5	5	5	3	3	3	4	3	2	3	4	3	1	2	2	2	0	0	0	0	1	5	5	5	3	3
A0A087WY71;E9PFW3;Q96CW1;C9JJ47;C9JTK4;C9JGT8;C9JJD3;C9JPV8;H7C4C3	A0A087WY71;E9PFW3;Q96CW1;C9JJ47	11;11;11;8;4;4;3;3;1	11;11;11;8;4;4;3;3;1	11;11;11;8;4;4;3;3;1	AP-2 complex subunit mu	AP2M1	tr|A0A087WY71|A0A087WY71_HUMAN AP-2 complex subunit mu OS=Homo sapiens OX=9606 GN=AP2M1 PE=1 SV=1;tr|E9PFW3|E9PFW3_HUMAN AP-2 complex subunit mu OS=Homo sapiens OX=9606 GN=AP2M1 PE=1 SV=1;sp|Q96CW1|AP2M1_HUMAN AP-2 complex subunit mu OS=Homo sapiens OX=960	9	11	11	11	6	5	1	2	1	2	1	0	0	0	0	0	2	3	5	4	3	3	3	3	1	6	5	1	2	1	2	1	0	0	0	0	0	2	3	5	4	3
A0A087WY82;Q9Y624	A0A087WY82;Q9Y624	7;7	7;7	7;7	Junctional adhesion molecule A	F11R	tr|A0A087WY82|A0A087WY82_HUMAN Junctional adhesion molecule 1 OS=Homo sapiens OX=9606 GN=F11R PE=1 SV=1;sp|Q9Y624|JAM1_HUMAN Junctional adhesion molecule A OS=Homo sapiens OX=9606 GN=F11R PE=1 SV=1	2	7	7	7	2	3	1	0	1	0	0	0	0	0	0	0	1	2	2	1	3	1	2	3	1	2	3	1	0	1	0	0	0	0	0	0	0	1	2	2	1	3
A0A087X0S5;P12109	A0A087X0S5;P12109	1;1	1;1	1;1	Collagen alpha-1(VI) chain	COL6A1	tr|A0A087X0S5|A0A087X0S5_HUMAN Collagen alpha-1(VI) chain OS=Homo sapiens OX=9606 GN=COL6A1 PE=1 SV=1;sp|P12109|CO6A1_HUMAN Collagen alpha-1(VI) chain OS=Homo sapiens OX=9606 GN=COL6A1 PE=1 SV=3	2	1	1	1	1	0	0	0	1	0	1	0	0	0	0	1	0	0	0	0	0	0	0	0	0	1	0	0	0	1	0	1	0	0	0	0	1	0	0	0	0	0
A0A087X243;P09211	A0A087X243;P09211	1;1	1;1	1;1	Glutathione S-transferase P	GSTP1	tr|A0A087X243|A0A087X243_HUMAN Glutathione S-transferase P (Fragment) OS=Homo sapiens OX=9606 GN=GSTP1 PE=1 SV=1;sp|P09211|GSTP1_HUMAN Glutathione S-transferase P OS=Homo sapiens OX=9606 GN=GSTP1 PE=1 SV=2	2	1	1	1	1	0	0	0	0	0	0	0	0	0	0	0	0	0	0	0	0	0	0	0	0	1	0	0	0	0	0	0	0	0	0	0	0	0	0	0	0	0
A0A087X295;Q9NNW5;E5RFX3;F8WE36;C9K020;E9PBK6;E9PDU5	A0A087X295;Q9NNW5;E5RFX3;F8WE36;C9K020;E9PBK6;E9PDU5	2;2;1;1;1;1;1	2;2;1;1;1;1;1	2;2;1;1;1;1;1	WD repeat-containing protein 6	WDR6	tr|A0A087X295|A0A087X295_HUMAN WD repeat-containing protein 6 OS=Homo sapiens OX=9606 GN=WDR6 PE=1 SV=1;sp|Q9NNW5|WDR6_HUMAN WD repeat-containing protein 6 OS=Homo sapiens OX=9606 GN=WDR6 PE=1 SV=1;tr|E5RFX3|E5RFX3_HUMAN WD repeat-containing protein 6 OS=H	7	2	2	2	2	0	0	0	0	0	0	0	0	0	0	0	0	0	0	0	0	0	0	0	0	2	0	0	0	0	0	0	0	0	0	0	0	0	0	0	0	0
A0A0A0MSQ0;P13797;P13796;Q14651;U3KQI3;H7C4N2;Q5TBN3;C9JAM8	A0A0A0MSQ0;P13797;P13796;Q14651	4;4;2;2;1;1;1;1	4;4;2;2;1;1;1;1	4;4;2;2;1;1;1;1	Plastin-3;Plastin-2;Plastin-1	PLS3;LCP1;PLS1	tr|A0A0A0MSQ0|A0A0A0MSQ0_HUMAN Plastin-3 OS=Homo sapiens OX=9606 GN=PLS3 PE=1 SV=1;sp|P13797|PLST_HUMAN Plastin-3 OS=Homo sapiens OX=9606 GN=PLS3 PE=1 SV=4;sp|P13796|PLSL_HUMAN Plastin-2 OS=Homo sapiens OX=9606 GN=LCP1 PE=1 SV=6;sp|Q14651|PLSI_HUMAN Plasti	8	4	4	4	3	3	1	1	1	0	0	0	0	0	0	1	0	1	1	0	0	0	0	1	0	3	3	1	1	1	0	0	0	0	0	0	1	0	1	1	0	0
A0A0C4DGH0;Q5ZPR3;H0YL10;H0YK40;H0YK59;H0YLT8;H0YN85;H0YN29	A0A0C4DGH0;Q5ZPR3;H0YL10	5;5;3;2;2;1;1;1	5;5;3;2;2;1;1;1	5;5;3;2;2;1;1;1	CD276 antigen	CD276	tr|A0A0C4DGH0|A0A0C4DGH0_HUMAN CD276 antigen OS=Homo sapiens OX=9606 GN=CD276 PE=1 SV=1;sp|Q5ZPR3|CD276_HUMAN CD276 antigen OS=Homo sapiens OX=9606 GN=CD276 PE=1 SV=1;tr|H0YL10|H0YL10_HUMAN CD276 antigen (Fragment) OS=Homo sapiens OX=9606 GN=CD276 PE=1 SV=	8	5	5	5	1	1	0	1	0	0	0	0	0	0	0	0	2	3	3	3	1	2	2	2	1	1	1	0	1	0	0	0	0	0	0	0	0	2	3	3	3	1
A0A0C4DGP3;D3DX46;Q13368	A0A0C4DGP3;D3DX46;Q13368	1;1;1	1;1;1	1;1;1	MAGUK p55 subfamily member 3	MPP3	tr|A0A0C4DGP3|A0A0C4DGP3_HUMAN MAGUK p55 subfamily member 3 OS=Homo sapiens OX=9606 GN=MPP3 PE=1 SV=1;tr|D3DX46|D3DX46_HUMAN MAGUK p55 subfamily member 3 OS=Homo sapiens OX=9606 GN=MPP3 PE=1 SV=1;sp|Q13368|MPP3_HUMAN MAGUK p55 subfamily member 3 OS=Homo sa	3	1	1	1	0	1	0	0	0	0	0	0	0	0	0	0	1	0	0	1	0	0	0	1	0	0	1	0	0	0	0	0	0	0	0	0	0	1	0	0	1	0
A0A0G2JIW1;P0DMV9;P0DMV8;V9GZ37	A0A0G2JIW1;P0DMV9;P0DMV8;V9GZ37	44;44;44;28	44;44;44;28	27;27;27;17	Heat shock 70 kDa protein 1B;Heat shock 70 kDa protein 1A	HSPA1B;HSPA1A	tr|A0A0G2JIW1|A0A0G2JIW1_HUMAN Heat shock 70 kDa protein 1B OS=Homo sapiens OX=9606 GN=HSPA1B PE=1 SV=1;sp|P0DMV9|HS71B_HUMAN Heat shock 70 kDa protein 1B OS=Homo sapiens OX=9606 GN=HSPA1B PE=1 SV=1;sp|P0DMV8|HS71A_HUMAN Heat shock 70 kDa protein 1A OS=Hom	4	44	44	27	26	31	26	12	22	16	9	1	1	8	7	11	18	23	24	18	19	18	18	19	17	26	31	26	12	22	16	9	1	1	8	7	11	18	23	24	18	19
A0A0G2JMZ8;Q16625	A0A0G2JMZ8;Q16625	1;1	1;1	1;1	Occludin	OCLN	tr|A0A0G2JMZ8|A0A0G2JMZ8_HUMAN Occludin OS=Homo sapiens OX=9606 GN=OCLN PE=1 SV=1;sp|Q16625|OCLN_HUMAN Occludin OS=Homo sapiens OX=9606 GN=OCLN PE=1 SV=1	2	1	1	1	1	1	0	0	0	0	0	0	0	0	0	0	0	0	0	0	0	0	0	0	0	1	1	0	0	0	0	0	0	0	0	0	0	0	0	0	0	0
A0A0U1RQQ4;Q9UNN8	A0A0U1RQQ4;Q9UNN8	2;2	2;2	2;2	Endothelial protein C receptor	PROCR	tr|A0A0U1RQQ4|A0A0U1RQQ4_HUMAN Endothelial protein C receptor (Fragment) OS=Homo sapiens OX=9606 GN=PROCR PE=1 SV=1;sp|Q9UNN8|EPCR_HUMAN Endothelial protein C receptor OS=Homo sapiens OX=9606 GN=PROCR PE=1 SV=1	2	2	2	2	1	0	0	0	0	0	0	0	0	0	0	0	1	1	1	1	0	1	1	2	0	1	0	0	0	0	0	0	0	0	0	0	0	1	1	1	1	0
A0A0U1RQT9;C9JYN0;Q16563	A0A0U1RQT9;C9JYN0;Q16563	1;1;1	1;1;1	1;1;1	Synaptophysin-like protein 1	SYPL1	tr|A0A0U1RQT9|A0A0U1RQT9_HUMAN Synaptophysin-like protein 1 (Fragment) OS=Homo sapiens OX=9606 GN=SYPL1 PE=1 SV=1;tr|C9JYN0|C9JYN0_HUMAN Synaptophysin-like protein 1 OS=Homo sapiens OX=9606 GN=SYPL1 PE=1 SV=1;sp|Q16563|SYPL1_HUMAN Synaptophysin-like protei	3	1	1	1	0	0	0	0	0	0	0	0	0	0	0	0	1	1	1	0	1	1	0	1	1	0	0	0	0	0	0	0	0	0	0	0	0	1	1	1	0	1
A0A0U1RR32;A0A0U1RRH7;Q99878;Q96KK5;Q9BTM1;Q16777;Q6FI13;P20671;P0C0S8;H0YFX9;A0A3B3IS11;Q96QV6;P16104;C9J0D1;A0A494C189;Q71UI9;P0C0S5;C9J386;Q8IUE6	A0A0U1RR32;A0A0U1RRH7;Q99878;Q96KK5;Q9BTM1;Q16777;Q6FI13;P20671;P0C0S8;H0YFX9;A0A3B3IS11;Q96QV6;P16104	5;5;5;5;5;5;5;5;5;4;3;3;3;2;2;2;2;1;1	5;5;5;5;5;5;5;5;5;4;3;3;3;2;2;2;2;1;1	1;1;1;1;1;1;1;1;1;1;0;0;0;0;0;0;0;0;0	Histone H2A type 1-J;Histone H2A type 1-H;Histone H2A.J;Histone H2A type 2-C;Histone H2A type 2-A;Histone H2A type 1-D;Histone H2A type 1;Histone H2A;Histone H2A type 1-A;Histone H2AX	HIST1H2AJ;HIST1H2AH;H2AFJ;HIST2H2AC;HIST2H2AA3;HIST1H2AD;HIST1H2AG;HIST1H2AA;H2AFX	tr|A0A0U1RR32|A0A0U1RR32_HUMAN Histone H2A OS=Homo sapiens OX=9606 GN=hCG_2039566 PE=3 SV=1;tr|A0A0U1RRH7|A0A0U1RRH7_HUMAN Histone H2A OS=Homo sapiens OX=9606 PE=3 SV=1;sp|Q99878|H2A1J_HUMAN Histone H2A type 1-J OS=Homo sapiens OX=9606 GN=H2AC14 PE=1 SV=3;	19	5	5	1	2	2	1	0	2	0	2	1	2	3	2	3	0	1	2	0	0	0	1	2	1	2	2	1	0	2	0	2	1	2	3	2	3	0	1	2	0	0
A0A140T955;A0A140T933;A0A1W2PPQ2;A0A1W2PRT9;Q53Z42;A0A140T9I0;A0A140T9X5;A0A140T913	A0A140T955;A0A140T933;A0A1W2PPQ2;A0A1W2PRT9;Q53Z42;A0A140T9I0;A0A140T9X5;A0A140T913	4;4;4;4;4;4;4;4	4;4;4;4;4;4;4;4	1;1;1;1;1;1;1;1		HLA-A	tr|A0A140T955|A0A140T955_HUMAN HLA class I histocompatibility antigen, A alpha chain OS=Homo sapiens OX=9606 GN=HLA-A PE=1 SV=1;tr|A0A140T933|A0A140T933_HUMAN HLA class I histocompatibility antigen, A alpha chain (Fragment) OS=Homo sapiens OX=9606 GN=HLA-A	8	4	4	1	3	3	1	2	2	1	2	0	0	0	0	0	1	1	2	1	2	2	0	2	0	3	3	1	2	2	1	2	0	0	0	0	0	1	1	2	1	2
A0A1W2PP35;A0A1X7SBS1;A0A1W2PPS1;Q00839;A0A1W2PP22;A0A1W2PRZ7;A0A1W2PQD4;A0A1W2PQ74;A0A1W2PQL0;A0A1W2PP34;A0A1W2PPL4;A0A1W2PPH7;Q5RI18	A0A1W2PP35;A0A1X7SBS1;A0A1W2PPS1;Q00839;A0A1W2PP22;A0A1W2PRZ7;A0A1W2PQD4;A0A1W2PQ74;A0A1W2PQL0;A0A1W2PP34;A0A1W2PPL4;A0A1W2PPH7;Q5RI18	2;2;2;2;1;1;1;1;1;1;1;1;1	2;2;2;2;1;1;1;1;1;1;1;1;1	2;2;2;2;1;1;1;1;1;1;1;1;1	Heterogeneous nuclear ribonucleoprotein U	HNRNPU	tr|A0A1W2PP35|A0A1W2PP35_HUMAN Heterogeneous nuclear ribonucleoprotein U (Fragment) OS=Homo sapiens OX=9606 GN=HNRNPU PE=1 SV=1;tr|A0A1X7SBS1|A0A1X7SBS1_HUMAN Heterogeneous nuclear ribonucleoprotein U OS=Homo sapiens OX=9606 GN=HNRNPU PE=1 SV=1;tr|A0A1W2PP	13	2	2	2	1	0	0	0	0	0	0	0	0	0	0	2	0	0	0	0	0	0	0	0	0	1	0	0	0	0	0	0	0	0	0	0	2	0	0	0	0	0
A0A1W2PPR8;P01889;F6U0H7;Q5SS57;A0A140TA21;A0A140TA05;A0A140T951;A0A1W2PNZ7;A0A140T9D4;A0A140T9L3;A0A140T9E1;A0A140T942;A0A140T9W2;Q53YP1;A0A140T9U0;A0A140T9M0;P13747;F8W9Z8;A0A140TA12;A0A140T9Z7;A0A140T9X6;A0A140T9W7;A0A140T9W3;A0A140T9D9;A0A140T9C2;A0A140T939;A0A140T9S9;A0A140T9H3;A0A140T9G0;A0A140T9A9;Q31611;A0A0G2JNX1;A0A140T9T1;A0A140T9V0;A0A140T8X0;Q8MH48;Q5RJ85;A0A0G2JPQ3;D0EV57;A0A0G2JPA3…	A0A1W2PPR8;P01889;F6U0H7;Q5SS57	5;5;4;3;2;2;2;2;2;2;2;2;2;2;2;2;2;1;1;1;1;1;1;1;1;1;1;1;1;1;1;1;1;1;1;1;1;1;1;1;1;1;1;1;1;1	5;5;4;3;2;2;2;2;2;2;2;2;2;2;2;2;2;1;1;1;1;1;1;1;1;1;1;1;1;1;1;1;1;1;1;1;1;1;1;1;1;1;1;1;1;1	1;1;1;0;0;0;0;0;0;0;0;0;0;0;0;0;0;0;0;0;0;0;0;0;0;0;0;0;0;0;0;0;0;0;0;0;0;0;0;0;0;0;0;0;0;0	HLA class I histocompatibility antigen, B-7 alpha chain	HLA-B	tr|A0A1W2PPR8|A0A1W2PPR8_HUMAN HLA class I histocompatibility antigen, B alpha chain OS=Homo sapiens OX=9606 GN=HLA-B PE=1 SV=1;sp|P01889|HLAB_HUMAN HLA class I histocompatibility antigen, B alpha chain OS=Homo sapiens OX=9606 GN=HLA-B PE=1 SV=3;tr|F6U0H7|	46	5	5	1	2	1	0	0	1	0	0	0	0	0	0	0	3	2	4	4	2	0	0	2	0	2	1	0	0	1	0	0	0	0	0	0	0	3	2	4	4	2
A0A286YFA2;A0A286YF22;A0A2C9F2M7;O43175;A0A286YFM8;A0A286YFL2;A0A286YER3;A0A286YFC8;A0A286YFB2;A0A286YF78	A0A286YFA2;A0A286YF22;A0A2C9F2M7;O43175;A0A286YFM8;A0A286YFL2	3;3;3;3;2;2;1;1;1;1	3;3;3;3;2;2;1;1;1;1	3;3;3;3;2;2;1;1;1;1	D-3-phosphoglycerate dehydrogenase	PHGDH	tr|A0A286YFA2|A0A286YFA2_HUMAN D-3-phosphoglycerate dehydrogenase OS=Homo sapiens OX=9606 GN=PHGDH PE=1 SV=1;tr|A0A286YF22|A0A286YF22_HUMAN D-3-phosphoglycerate dehydrogenase OS=Homo sapiens OX=9606 GN=PHGDH PE=1 SV=1;tr|A0A2C9F2M7|A0A2C9F2M7_HUMAN D-3-pho	10	3	3	3	0	1	0	2	2	0	0	0	0	0	0	2	0	0	0	0	0	0	0	0	0	0	1	0	2	2	0	0	0	0	0	0	2	0	0	0	0	0
A0A2R8Y484;Q08722	A0A2R8Y484;Q08722	2;2	2;2	2;2	Leukocyte surface antigen CD47	CD47	tr|A0A2R8Y484|A0A2R8Y484_HUMAN Integrin-associated protein (Fragment) OS=Homo sapiens OX=9606 GN=CD47 PE=1 SV=1;sp|Q08722|CD47_HUMAN Leukocyte surface antigen CD47 OS=Homo sapiens OX=9606 GN=CD47 PE=1 SV=1	2	2	2	2	0	0	0	0	0	0	0	0	0	0	0	0	1	0	2	1	1	2	0	0	0	0	0	0	0	0	0	0	0	0	0	0	0	1	0	2	1	1
A0A2R8Y5U1;Q76L82;Q8IXJ9	A0A2R8Y5U1;Q76L82;Q8IXJ9	1;1;1	1;1;1	1;1;1	Putative Polycomb group protein ASXL1	ASXH1;ASXL1	tr|A0A2R8Y5U1|A0A2R8Y5U1_HUMAN Polycomb group protein ASXL1 OS=Homo sapiens OX=9606 GN=ASXL1 PE=1 SV=1;tr|Q76L82|Q76L82_HUMAN Additional sex combs like 1 (Drosophila), isoform CRA_d OS=Homo sapiens OX=9606 GN=ASXL1 PE=1 SV=1;sp|Q8IXJ9|ASXL1_HUMAN Polycomb	3	1	1	1	0	1	0	0	0	0	0	0	0	0	0	0	0	0	0	0	0	0	0	0	0	0	1	0	0	0	0	0	0	0	0	0	0	0	0	0	0	0
A0A2R8Y7M3;A0A2R8Y5S7;P35241;E9PNV3;A0A2R8Y5P0;E9PQ82	A0A2R8Y7M3;A0A2R8Y5S7;P35241;E9PNV3	6;6;6;3;2;2	2;2;2;2;2;1	2;2;2;2;2;1	Radixin	RDX	tr|A0A2R8Y7M3|A0A2R8Y7M3_HUMAN Radixin OS=Homo sapiens OX=9606 GN=RDX PE=1 SV=1;tr|A0A2R8Y5S7|A0A2R8Y5S7_HUMAN Radixin OS=Homo sapiens OX=9606 GN=RDX PE=1 SV=1;sp|P35241|RADI_HUMAN Radixin OS=Homo sapiens OX=9606 GN=RDX PE=1 SV=1;tr|E9PNV3|E9PNV3_HUMAN Rad	6	6	2	2	1	4	1	1	1	1	0	0	0	1	2	2	1	2	2	2	2	1	2	1	1	0	2	0	0	0	0	0	0	0	0	0	0	0	0	0	0	0
A0A2R8Y804;A0A2R8Y543;A0A2R8Y5C3;A0A2R8Y750;A0A2R8Y5Z1;B4DGU4;A0A2R8YCH5;A0A2R8Y7Z0;A0A2R8Y5A3;P35222	A0A2R8Y804;A0A2R8Y543;A0A2R8Y5C3;A0A2R8Y750;A0A2R8Y5Z1;B4DGU4;A0A2R8YCH5;A0A2R8Y7Z0;A0A2R8Y5A3;P35222	1;1;1;1;1;1;1;1;1;1	1;1;1;1;1;1;1;1;1;1	1;1;1;1;1;1;1;1;1;1	Catenin beta-1	CTNNB1	tr|A0A2R8Y804|A0A2R8Y804_HUMAN Catenin beta-1 OS=Homo sapiens OX=9606 GN=CTNNB1 PE=1 SV=1;tr|A0A2R8Y543|A0A2R8Y543_HUMAN Catenin beta-1 OS=Homo sapiens OX=9606 GN=CTNNB1 PE=1 SV=1;tr|A0A2R8Y5C3|A0A2R8Y5C3_HUMAN Catenin beta-1 OS=Homo sapiens OX=9606 GN=CTN	10	1	1	1	1	0	0	0	0	0	0	0	0	0	0	0	0	0	0	0	0	0	0	0	0	1	0	0	0	0	0	0	0	0	0	0	0	0	0	0	0	0
A0A2U3TZL8;H7BYN4;Q02241	A0A2U3TZL8;H7BYN4;Q02241	1;1;1	1;1;1	1;1;1	Kinesin-like protein;Kinesin-like protein KIF23	KIF23	tr|A0A2U3TZL8|A0A2U3TZL8_HUMAN Kinesin-like protein OS=Homo sapiens OX=9606 GN=KIF23 PE=1 SV=1;tr|H7BYN4|H7BYN4_HUMAN Kinesin-like protein OS=Homo sapiens OX=9606 GN=KIF23 PE=1 SV=1;sp|Q02241|KIF23_HUMAN Kinesin-like protein KIF23 OS=Homo sapiens OX=9606 G	3	1	1	1	0	0	0	0	0	0	0	0	0	0	0	0	0	0	1	0	0	0	0	0	0	0	0	0	0	0	0	0	0	0	0	0	0	0	0	1	0	0
A0A3B3IST1;B5MD23;O75954	A0A3B3IST1;B5MD23;O75954	2;2;2	2;2;2	2;2;2	Tetraspanin;Tetraspanin-9	TSPAN9	tr|A0A3B3IST1|A0A3B3IST1_HUMAN Tetraspanin-9 (Fragment) OS=Homo sapiens OX=9606 GN=TSPAN9 PE=1 SV=1;tr|B5MD23|B5MD23_HUMAN Tetraspanin OS=Homo sapiens OX=9606 GN=TSPAN9 PE=1 SV=1;sp|O75954|TSN9_HUMAN Tetraspanin-9 OS=Homo sapiens OX=9606 GN=TSPAN9 PE=1 SV=	3	2	2	2	0	0	0	0	0	0	0	0	0	0	0	0	1	2	0	1	0	2	0	0	0	0	0	0	0	0	0	0	0	0	0	0	0	1	2	0	1	0
A0A3B3ISW7;Q86VN1	A0A3B3ISW7;Q86VN1	5;5	5;5	5;5	Vacuolar protein-sorting-associated protein 36	VPS36	tr|A0A3B3ISW7|A0A3B3ISW7_HUMAN ESCRT-II complex subunit VPS36 OS=Homo sapiens OX=9606 GN=VPS36 PE=1 SV=1;sp|Q86VN1|VPS36_HUMAN Vacuolar protein-sorting-associated protein 36 OS=Homo sapiens OX=9606 GN=VPS36 PE=1 SV=1	2	5	5	5	1	1	0	0	1	0	0	0	0	0	0	0	3	4	4	3	3	1	1	3	1	1	1	0	0	1	0	0	0	0	0	0	0	3	4	4	3	3
A0A494C017;C9JJV6;C9JZL8;A0A499FIY8;C9JC07;Q96S97	A0A494C017;C9JJV6;C9JZL8;A0A499FIY8;C9JC07;Q96S97	1;1;1;1;1;1	1;1;1;1;1;1	1;1;1;1;1;1	Myeloid-associated differentiation marker	MYADM	tr|A0A494C017|A0A494C017_HUMAN Myeloid-associated differentiation marker (Fragment) OS=Homo sapiens OX=9606 GN=MYADM PE=1 SV=1;tr|C9JJV6|C9JJV6_HUMAN Myeloid-associated differentiation marker (Fragment) OS=Homo sapiens OX=9606 GN=MYADM PE=1 SV=8;tr|C9JZL8|	6	1	1	1	0	0	0	0	0	0	0	0	0	0	0	0	1	1	1	1	1	1	1	1	0	0	0	0	0	0	0	0	0	0	0	0	0	1	1	1	1	1
A0A494C060;F6THM6;A0A494C1A0;P35609	A0A494C060;F6THM6;A0A494C1A0;P35609	2;2;2;2	2;2;2;2	2;2;2;2	Alpha-actinin-2	ACTN2	tr|A0A494C060|A0A494C060_HUMAN Alpha-actinin-2 (Fragment) OS=Homo sapiens OX=9606 GN=ACTN2 PE=1 SV=1;tr|F6THM6|F6THM6_HUMAN Alpha-actinin-2 OS=Homo sapiens OX=9606 GN=ACTN2 PE=1 SV=1;tr|A0A494C1A0|A0A494C1A0_HUMAN Alpha-actinin-2 (Fragment) OS=Homo sapiens	4	2	2	2	0	0	0	0	0	0	1	0	0	0	0	0	1	1	0	0	0	0	0	0	0	0	0	0	0	0	0	1	0	0	0	0	0	1	1	0	0	0
A0A494C175;A0A0S2Z4A4;P58340;A0A494C127;A0A494C1S3;A0A494C1P6	A0A494C175;A0A0S2Z4A4;P58340;A0A494C127;A0A494C1S3;A0A494C1P6	3;3;3;2;2;2	3;3;3;2;2;2	3;3;3;2;2;2	Myeloid leukemia factor 1	MLF1	tr|A0A494C175|A0A494C175_HUMAN Myeloid leukemia factor 1 OS=Homo sapiens OX=9606 GN=MLF1 PE=1 SV=1;tr|A0A0S2Z4A4|A0A0S2Z4A4_HUMAN Myeloid leukemia factor 1 (Fragment) OS=Homo sapiens OX=9606 GN=MLF1 PE=1 SV=1;sp|P58340|MLF1_HUMAN Myeloid leukemia factor 1	6	3	3	3	0	0	0	0	0	0	0	0	0	0	0	0	2	1	2	1	2	1	2	1	0	0	0	0	0	0	0	0	0	0	0	0	0	2	1	2	1	2
A0A590UK44;A0A590UJW8;A0A590UJQ1;Q96J02;Q9H0M0;H0YBS9;H0YBA4;A0A590UK95;O00308	A0A590UK44;A0A590UJW8;A0A590UJQ1;Q96J02;Q9H0M0	3;3;3;3;2;1;1;1;1	3;3;3;3;2;1;1;1;1	3;3;3;3;2;1;1;1;1	E3 ubiquitin-protein ligase Itchy homolog;NEDD4-like E3 ubiquitin-protein ligase WWP1	ITCH;WWP1	tr|A0A590UK44|A0A590UK44_HUMAN E3 ubiquitin-protein ligase OS=Homo sapiens OX=9606 GN=ITCH PE=1 SV=1;tr|A0A590UJW8|A0A590UJW8_HUMAN E3 ubiquitin-protein ligase OS=Homo sapiens OX=9606 GN=ITCH PE=1 SV=1;tr|A0A590UJQ1|A0A590UJQ1_HUMAN E3 ubiquitin-protein li	9	3	3	3	0	0	0	0	0	0	0	0	0	0	0	0	0	1	2	0	0	2	0	0	0	0	0	0	0	0	0	0	0	0	0	0	0	0	1	2	0	0
A0A5F9W493;E7ETM0	A0A5F9W493;E7ETM0	10;8	1;1	0;0		CSNK1A1	tr|A0A5F9W493|A0A5F9W493_HUMAN Casein kinase 1, alpha 1, isoform CRA_d OS=Homo sapiens OX=9606 GN=CSNK1A1 PE=1 SV=1;tr|E7ETM0|E7ETM0_HUMAN Casein kinase I isoform alpha OS=Homo sapiens OX=9606 GN=CSNK1A1 PE=1 SV=1	2	10	1	0	1	1	0	0	1	0	0	0	0	0	0	0	8	8	9	5	5	3	5	2	1	0	0	0	0	0	0	0	0	0	0	0	0	1	1	1	1	1
A0A5F9ZH78;P05089	A0A5F9ZH78;P05089	2;2	2;2	2;2	Arginase-1	ARG1	tr|A0A5F9ZH78|A0A5F9ZH78_HUMAN Arginase-1 OS=Homo sapiens OX=9606 GN=ARG1 PE=1 SV=1;sp|P05089|ARGI1_HUMAN Arginase-1 OS=Homo sapiens OX=9606 GN=ARG1 PE=1 SV=2	2	2	2	2	0	0	0	0	0	0	0	0	0	0	0	2	0	0	0	0	0	0	0	0	0	0	0	0	0	0	0	0	0	0	0	0	2	0	0	0	0	0
A0A5H1ZRQ3;P01834	A0A5H1ZRQ3;P01834	1;1	1;1	1;1	Ig kappa chain C region	IGKC	tr|A0A5H1ZRQ3|A0A5H1ZRQ3_HUMAN Immunoglobulin kappa constant (Fragment) OS=Homo sapiens OX=9606 GN=IGKC PE=1 SV=1;sp|P01834|IGKC_HUMAN Immunoglobulin kappa constant OS=Homo sapiens OX=9606 GN=IGKC PE=1 SV=2	2	1	1	1	0	0	0	0	0	0	0	0	0	0	0	0	0	0	0	1	0	0	0	0	0	0	0	0	0	0	0	0	0	0	0	0	0	0	0	0	1	0
A0A669KB62;A0A669KB05;C9JZR2;O60716	A0A669KB62;A0A669KB05;C9JZR2;O60716	1;1;1;1	1;1;1;1	1;1;1;1	Catenin delta-1	CTNND1	tr|A0A669KB62|A0A669KB62_HUMAN Catenin delta-1 OS=Homo sapiens OX=9606 GN=CTNND1 PE=1 SV=1;tr|A0A669KB05|A0A669KB05_HUMAN Catenin delta-1 OS=Homo sapiens OX=9606 GN=CTNND1 PE=1 SV=1;tr|C9JZR2|C9JZR2_HUMAN Catenin delta-1 OS=Homo sapiens OX=9606 GN=CTNND1 P	4	1	1	1	1	1	0	0	1	0	0	0	0	0	0	0	0	0	0	0	0	0	0	0	0	1	1	0	0	1	0	0	0	0	0	0	0	0	0	0	0	0
A6NNI4;A0A2R8Y478;G8JLH6;P21926;A0A087WU13	A6NNI4;A0A2R8Y478;G8JLH6;P21926	4;4;4;4;1	4;4;4;4;1	4;4;4;4;1	Tetraspanin;CD9 antigen	CD9	tr|A6NNI4|A6NNI4_HUMAN Tetraspanin OS=Homo sapiens OX=9606 GN=CD9 PE=1 SV=1;tr|A0A2R8Y478|A0A2R8Y478_HUMAN Tetraspanin OS=Homo sapiens OX=9606 GN=CD9 PE=1 SV=1;tr|G8JLH6|G8JLH6_HUMAN Tetraspanin OS=Homo sapiens OX=9606 GN=CD9 PE=1 SV=2;sp|P21926|CD9_HUMAN	5	4	4	4	1	2	1	0	0	0	0	0	0	1	0	0	2	3	2	2	2	2	2	3	2	1	2	1	0	0	0	0	0	0	1	0	0	2	3	2	2	2
A6NP16;E7ERM3;Q4VCS5	A6NP16;E7ERM3;Q4VCS5	2;2;2	2;2;2	2;2;2	Angiomotin	AMOT	tr|A6NP16|A6NP16_HUMAN Angiomotin OS=Homo sapiens OX=9606 GN=AMOT PE=1 SV=1;tr|E7ERM3|E7ERM3_HUMAN Angiomotin OS=Homo sapiens OX=9606 GN=AMOT PE=1 SV=1;sp|Q4VCS5|AMOT_HUMAN Angiomotin OS=Homo sapiens OX=9606 GN=AMOT PE=1 SV=1	3	2	2	2	1	1	1	1	1	0	0	0	0	0	0	0	0	0	0	0	0	0	0	0	1	1	1	1	1	1	0	0	0	0	0	0	0	0	0	0	0	0
A8MUA9;A8MU27;Q6EEV6;P61956;P55854	A8MUA9;A8MU27;Q6EEV6;P61956;P55854	1;1;1;1;1	1;1;1;1;1	1;1;1;1;1	Small ubiquitin-related modifier 4;Small ubiquitin-related modifier 2;Small ubiquitin-related modifier 3	SUMO3;SUMO4;SUMO2	tr|A8MUA9|A8MUA9_HUMAN SMT3 suppressor of mif two 3 homolog 3 (Yeast), isoform CRA_d OS=Homo sapiens OX=9606 GN=SUMO3 PE=1 SV=1;tr|A8MU27|A8MU27_HUMAN Small ubiquitin-related modifier 3 OS=Homo sapiens OX=9606 GN=SUMO3 PE=1 SV=1;sp|Q6EEV6|SUMO4_HUMAN Small	5	1	1	1	0	0	0	1	0	0	0	0	0	0	0	0	1	1	1	1	1	1	0	1	0	0	0	0	1	0	0	0	0	0	0	0	0	1	1	1	1	1
A8MUD9;P18124;C9JZ88;C9JIJ5	A8MUD9;P18124	4;4;1;1	4;4;1;1	4;4;1;1	60S ribosomal protein L7	RPL7	tr|A8MUD9|A8MUD9_HUMAN 60S ribosomal protein L7 OS=Homo sapiens OX=9606 GN=RPL7 PE=1 SV=1;sp|P18124|RL7_HUMAN 60S ribosomal protein L7 OS=Homo sapiens OX=9606 GN=RPL7 PE=1 SV=1	4	4	4	4	1	0	0	0	1	0	2	0	0	1	1	4	0	0	0	0	0	0	0	0	0	1	0	0	0	1	0	2	0	0	1	1	4	0	0	0	0	0
A8MV73;Q6VMQ6	A8MV73;Q6VMQ6	1;1	1;1	1;1	Activating transcription factor 7-interacting protein 1	ATF7IP	tr|A8MV73|A8MV73_HUMAN Activating transcription factor 7-interacting protein 1 (Fragment) OS=Homo sapiens OX=9606 GN=ATF7IP PE=1 SV=2;sp|Q6VMQ6|MCAF1_HUMAN Activating transcription factor 7-interacting protein 1 OS=Homo sapiens OX=9606 GN=ATF7IP PE=1 SV=3	2	1	1	1	0	0	0	0	0	0	0	0	0	0	0	1	0	0	0	0	0	0	0	0	0	0	0	0	0	0	0	0	0	0	0	0	1	0	0	0	0	0
B0YJC4;P08670;A0A1B0GTT5;B0YJC5	B0YJC4;P08670;A0A1B0GTT5;B0YJC5	2;2;1;1	2;2;1;1	2;2;1;1	Vimentin	VIM	tr|B0YJC4|B0YJC4_HUMAN Vimentin OS=Homo sapiens OX=9606 GN=VIM PE=1 SV=1;sp|P08670|VIME_HUMAN Vimentin OS=Homo sapiens OX=9606 GN=VIM PE=1 SV=4;tr|A0A1B0GTT5|A0A1B0GTT5_HUMAN Vimentin (Fragment) OS=Homo sapiens OX=9606 GN=VIM PE=1 SV=1;tr|B0YJC5|B0YJC5_HUM	4	2	2	2	0	0	0	0	0	0	0	0	2	0	0	0	0	0	0	0	0	0	0	0	0	0	0	0	0	0	0	0	0	2	0	0	0	0	0	0	0	0
B1AHC9;P12956	B1AHC9;P12956	2;2	2;2	2;2	X-ray repair cross-complementing protein 6	XRCC6	tr|B1AHC9|B1AHC9_HUMAN ATP-dependent DNA helicase 2 subunit 1 OS=Homo sapiens OX=9606 GN=XRCC6 PE=1 SV=1;sp|P12956|XRCC6_HUMAN X-ray repair cross-complementing protein 6 OS=Homo sapiens OX=9606 GN=XRCC6 PE=1 SV=2	2	2	2	2	0	0	0	0	0	0	0	0	0	0	0	2	0	0	0	0	0	0	0	0	0	0	0	0	0	0	0	0	0	0	0	0	2	0	0	0	0	0
B1AK85;P47756;A0A6I8PRV6;A0A6I8PIN8;B1AK87;B1AK88	B1AK85;P47756;A0A6I8PRV6;A0A6I8PIN8;B1AK87;B1AK88	2;2;1;1;1;1	2;2;1;1;1;1	2;2;1;1;1;1	F-actin-capping protein subunit beta	CAPZB	tr|B1AK85|B1AK85_HUMAN F-actin-capping protein subunit beta OS=Homo sapiens OX=9606 GN=CAPZB PE=1 SV=1;sp|P47756|CAPZB_HUMAN F-actin-capping protein subunit beta OS=Homo sapiens OX=9606 GN=CAPZB PE=1 SV=4;tr|A0A6I8PRV6|A0A6I8PRV6_HUMAN F-actin-capping prot	6	2	2	2	1	0	0	0	1	0	0	0	0	0	0	0	0	2	0	1	1	0	1	0	0	1	0	0	0	1	0	0	0	0	0	0	0	0	2	0	1	1
B1ANR0;Q13310;H0Y5F5;B1ANR1;H0YEU6;H0YCC8	B1ANR0;Q13310;H0Y5F5;B1ANR1	11;11;7;6;4;1	4;4;3;1;2;1	4;4;3;1;2;1	Polyadenylate-binding protein;Polyadenylate-binding protein 4	PABPC4	tr|B1ANR0|B1ANR0_HUMAN Polyadenylate-binding protein OS=Homo sapiens OX=9606 GN=PABPC4 PE=1 SV=1;sp|Q13310|PABP4_HUMAN Polyadenylate-binding protein 4 OS=Homo sapiens OX=9606 GN=PABPC4 PE=1 SV=1;tr|H0Y5F5|H0Y5F5_HUMAN Polyadenylate-binding protein (Fragmen	6	11	4	4	6	7	1	1	3	2	1	0	0	0	0	0	5	3	5	4	3	1	3	2	2	1	2	0	0	2	0	0	0	0	0	0	0	2	1	2	2	1
B4DN67;Q96J84	B4DN67;Q96J84	1;1	1;1	1;1	Kin of IRRE-like protein 1	KIRREL	tr|B4DN67|B4DN67_HUMAN Kin of IRRE-like protein 1 OS=Homo sapiens OX=9606 GN=KIRREL1 PE=1 SV=1;sp|Q96J84|KIRR1_HUMAN Kin of IRRE-like protein 1 OS=Homo sapiens OX=9606 GN=KIRREL1 PE=1 SV=2	2	1	1	1	1	0	0	0	0	0	0	0	0	0	0	0	0	0	0	0	0	0	0	0	0	1	0	0	0	0	0	0	0	0	0	0	0	0	0	0	0	0
B4DUR8;P49368	B4DUR8;P49368	2;2	2;2	2;2	T-complex protein 1 subunit gamma	CCT3	tr|B4DUR8|B4DUR8_HUMAN T-complex protein 1 subunit gamma OS=Homo sapiens OX=9606 GN=CCT3 PE=1 SV=1;sp|P49368|TCPG_HUMAN T-complex protein 1 subunit gamma OS=Homo sapiens OX=9606 GN=CCT3 PE=1 SV=4	2	2	2	2	2	0	1	1	0	0	2	0	0	0	0	0	0	0	0	0	0	0	0	0	0	2	0	1	1	0	0	2	0	0	0	0	0	0	0	0	0	0
B5MDF5;P62826;F5H018;J3KQE5;B4DV51;A0A087X0W0;H0YFC6	B5MDF5;P62826;F5H018;J3KQE5;B4DV51	5;5;4;4;3;1;1	5;5;4;4;3;1;1	5;5;4;4;3;1;1	GTP-binding nuclear protein Ran	RAN	tr|B5MDF5|B5MDF5_HUMAN GTP-binding nuclear protein Ran OS=Homo sapiens OX=9606 GN=RAN PE=1 SV=1;sp|P62826|RAN_HUMAN GTP-binding nuclear protein Ran OS=Homo sapiens OX=9606 GN=RAN PE=1 SV=3;tr|F5H018|F5H018_HUMAN GTP-binding nuclear protein Ran (Fragment) O	7	5	5	5	0	1	1	0	0	0	0	0	0	0	0	1	2	1	3	0	1	1	1	2	0	0	1	1	0	0	0	0	0	0	0	0	1	2	1	3	0	1
B7Z248;B7Z613;Q13491	B7Z248;B7Z613;Q13491	1;1;1	1;1;1	1;1;1	Neuronal membrane glycoprotein M6-b	GPM6B	tr|B7Z248|B7Z248_HUMAN Neuronal membrane glycoprotein M6-b OS=Homo sapiens OX=9606 GN=GPM6B PE=1 SV=1;tr|B7Z613|B7Z613_HUMAN Neuronal membrane glycoprotein M6-b OS=Homo sapiens OX=9606 GN=GPM6B PE=1 SV=1;sp|Q13491|GPM6B_HUMAN Neuronal membrane glycoprotein	3	1	1	1	0	0	0	0	0	0	0	0	0	0	0	0	1	0	1	0	0	0	0	0	1	0	0	0	0	0	0	0	0	0	0	0	0	1	0	1	0	0
B7ZKQ9;Q8WTV0;F5H4X0;F5H5E8	B7ZKQ9;Q8WTV0;F5H4X0	4;3;2;1	4;3;2;1	4;3;2;1	Scavenger receptor class B member 1	SCARB1	tr|B7ZKQ9|B7ZKQ9_HUMAN SCARB1 protein OS=Homo sapiens OX=9606 GN=SCARB1 PE=1 SV=1;sp|Q8WTV0|SCRB1_HUMAN Scavenger receptor class B member 1 OS=Homo sapiens OX=9606 GN=SCARB1 PE=1 SV=1;tr|F5H4X0|F5H4X0_HUMAN Scavenger receptor class B member 1 OS=Homo sapie	4	4	4	4	0	1	0	0	0	0	1	0	0	0	0	0	0	1	0	0	0	0	1	1	0	0	1	0	0	0	0	1	0	0	0	0	0	0	1	0	0	0
B8ZZX6;Q658P3	B8ZZX6;Q658P3	1;1	1;1	1;1	Metalloreductase STEAP3	STEAP3	tr|B8ZZX6|B8ZZX6_HUMAN Metalloreductase STEAP3 OS=Homo sapiens OX=9606 GN=STEAP3 PE=1 SV=1;sp|Q658P3|STEA3_HUMAN Metalloreductase STEAP3 OS=Homo sapiens OX=9606 GN=STEAP3 PE=1 SV=2	2	1	1	1	0	1	0	0	0	0	1	0	0	0	0	0	0	0	0	0	0	0	0	0	0	0	1	0	0	0	0	1	0	0	0	0	0	0	0	0	0	0
C9J0A7;Q9UQN3;A0A087WW88	C9J0A7;Q9UQN3	7;7;1	7;7;1	7;7;1	Charged multivesicular body protein 2b	CHMP2B	tr|C9J0A7|C9J0A7_HUMAN Charged multivesicular body protein 2b OS=Homo sapiens OX=9606 GN=CHMP2B PE=1 SV=1;sp|Q9UQN3|CHM2B_HUMAN Charged multivesicular body protein 2b OS=Homo sapiens OX=9606 GN=CHMP2B PE=1 SV=1	3	7	7	7	5	4	2	1	2	0	0	0	0	0	0	0	2	2	2	2	2	2	1	2	1	5	4	2	1	2	0	0	0	0	0	0	0	2	2	2	2	2
C9J0E4;P01040	C9J0E4;P01040	1;1	1;1	1;1	Cystatin-A;Cystatin-A, N-terminally processed	CSTA	tr|C9J0E4|C9J0E4_HUMAN Cystatin-A OS=Homo sapiens OX=9606 GN=CSTA PE=1 SV=1;sp|P01040|CYTA_HUMAN Cystatin-A OS=Homo sapiens OX=9606 GN=CSTA PE=1 SV=1	2	1	1	1	0	0	0	0	0	0	0	0	0	0	0	1	0	1	0	0	0	0	0	0	0	0	0	0	0	0	0	0	0	0	0	0	1	0	1	0	0	0
C9J2C4;A0A0J9YX62;O75190;C9JDR7;C9JDX6;F8WCZ4;C9J2P2;E9PH18;C9JB42;C9JN01;C9JRD2;C9JXB9;Q8WWF6;Q8NHS0;P25686	C9J2C4;A0A0J9YX62;O75190;C9JDR7;C9JDX6;F8WCZ4;C9J2P2;E9PH18;C9JB42	4;4;4;3;3;3;3;3;2;1;1;1;1;1;1	4;4;4;3;3;3;3;3;2;1;1;1;1;1;1	4;4;4;3;3;3;3;3;2;1;1;1;1;1;1	DnaJ homolog subfamily B member 6	DNAJB6	tr|C9J2C4|C9J2C4_HUMAN DnaJ homolog subfamily B member 6 (Fragment) OS=Homo sapiens OX=9606 GN=DNAJB6 PE=1 SV=1;tr|A0A0J9YX62|A0A0J9YX62_HUMAN DnaJ homolog subfamily B member 6 OS=Homo sapiens OX=9606 GN=DNAJB6 PE=1 SV=1;sp|O75190|DNJB6_HUMAN DnaJ homolog	15	4	4	4	0	0	0	0	1	0	0	0	0	0	0	0	2	2	3	2	3	2	2	1	1	0	0	0	0	1	0	0	0	0	0	0	0	2	2	3	2	3
C9J6P4;Q7Z2W4;H7C5K1	C9J6P4;Q7Z2W4;H7C5K1	2;2;1	2;2;1	2;2;1	Zinc finger CCCH-type antiviral protein 1	ZC3HAV1	tr|C9J6P4|C9J6P4_HUMAN Zinc finger CCCH-type antiviral protein 1 OS=Homo sapiens OX=9606 GN=ZC3HAV1 PE=1 SV=1;sp|Q7Z2W4|ZCCHV_HUMAN Zinc finger CCCH-type antiviral protein 1 OS=Homo sapiens OX=9606 GN=ZC3HAV1 PE=1 SV=3;tr|H7C5K1|H7C5K1_HUMAN Zinc finger CC	3	2	2	2	0	1	0	0	0	0	0	0	0	0	0	0	0	1	1	0	0	0	0	0	0	0	1	0	0	0	0	0	0	0	0	0	0	0	1	1	0	0
C9JB90;C9JU14;J3KR73;Q9NRW1;P20340;Q14964	C9JB90;C9JU14;J3KR73;Q9NRW1;P20340;Q14964	1;1;1;1;1;1	1;1;1;1;1;1	1;1;1;1;1;1	Ras-related protein Rab-6B;Ras-related protein Rab-6A;Ras-related protein Rab-39A	RAB6B;RAB6A;RAB39A	tr|C9JB90|C9JB90_HUMAN Ras-related protein Rab-6B (Fragment) OS=Homo sapiens OX=9606 GN=RAB6B PE=4 SV=1;tr|C9JU14|C9JU14_HUMAN Ras-related protein Rab-6B (Fragment) OS=Homo sapiens OX=9606 GN=RAB6B PE=1 SV=3;tr|J3KR73|J3KR73_HUMAN Ras-related protein Rab-6	6	1	1	1	1	0	0	0	1	0	0	0	0	0	0	1	1	1	1	1	1	1	1	1	0	1	0	0	0	1	0	0	0	0	0	0	1	1	1	1	1	1
C9JEU5;C9JC84;P02679	C9JEU5;C9JC84;P02679	3;3;3	3;3;3	3;3;3	Fibrinogen gamma chain	FGG	tr|C9JEU5|C9JEU5_HUMAN Fibrinogen gamma chain OS=Homo sapiens OX=9606 GN=FGG PE=1 SV=1;tr|C9JC84|C9JC84_HUMAN Fibrinogen gamma chain OS=Homo sapiens OX=9606 GN=FGG PE=1 SV=1;sp|P02679|FIBG_HUMAN Fibrinogen gamma chain OS=Homo sapiens OX=9606 GN=FGG PE=1 SV	3	3	3	3	0	0	0	0	0	0	1	1	1	0	0	1	0	0	0	0	0	0	0	0	0	0	0	0	0	0	0	1	1	1	0	0	1	0	0	0	0	0
C9JEV0;P25311	C9JEV0;P25311	3;3	3;3	3;3	Zinc-alpha-2-glycoprotein	AZGP1	tr|C9JEV0|C9JEV0_HUMAN Zinc-alpha-2-glycoprotein OS=Homo sapiens OX=9606 GN=AZGP1 PE=1 SV=1;sp|P25311|ZA2G_HUMAN Zinc-alpha-2-glycoprotein OS=Homo sapiens OX=9606 GN=AZGP1 PE=1 SV=2	2	3	3	3	0	0	0	0	0	0	0	0	0	0	0	1	2	1	0	0	1	1	0	0	0	0	0	0	0	0	0	0	0	0	0	0	1	2	1	0	0	1
C9JUE0;C9JJP5;Q92734	C9JUE0;C9JJP5;Q92734	1;1;1	1;1;1	1;1;1	Protein TFG	TFG	tr|C9JUE0|C9JUE0_HUMAN Protein TFG (Fragment) OS=Homo sapiens OX=9606 GN=TFG PE=1 SV=1;tr|C9JJP5|C9JJP5_HUMAN Protein TFG (Fragment) OS=Homo sapiens OX=9606 GN=TFG PE=1 SV=1;sp|Q92734|TFG_HUMAN Protein TFG OS=Homo sapiens OX=9606 GN=TFG PE=1 SV=2	3	1	1	1	0	0	0	0	0	0	0	0	0	0	0	1	0	0	0	0	0	0	0	0	0	0	0	0	0	0	0	0	0	0	0	0	1	0	0	0	0	0
C9JZN1;C9JIS1;C9JXA5;P62879;E7EP32;Q9HAV0;C9JD14;H7C5J5;F5H8J8;F5H100;F5H0S8;E9PCP0;P16520	C9JZN1;C9JIS1;C9JXA5;P62879;E7EP32;Q9HAV0	6;6;6;6;3;3;1;1;1;1;1;1;1	4;4;4;4;1;1;0;1;0;0;0;0;0	4;4;4;4;1;1;0;1;0;0;0;0;0	Guanine nucleotide-binding protein G(I)/G(S)/G(T) subunit beta-2;Guanine nucleotide-binding protein subunit beta-4	GNB2;GNB4	tr|C9JZN1|C9JZN1_HUMAN Guanine nucleotide-binding protein G(I)/G(S)/G(T) subunit beta-2 (Fragment) OS=Homo sapiens OX=9606 GN=GNB2 PE=1 SV=1;tr|C9JIS1|C9JIS1_HUMAN Guanine nucleotide-binding protein G(I)/G(S)/G(T) subunit beta-2 (Fragment) OS=Homo sapiens	13	6	4	4	2	1	2	0	2	1	0	0	0	1	0	0	1	2	2	2	0	1	0	1	0	2	1	2	0	2	1	0	0	0	0	0	0	0	0	1	1	0
C9K0L8;K7ERZ0;K7EN66	C9K0L8;K7ERZ0;K7EN66	18;18;13	1;1;1	1;1;1		CNP	tr|C9K0L8|C9K0L8_HUMAN 2,3-cyclic-nucleotide 3-phosphodiesterase (Fragment) OS=Homo sapiens OX=9606 GN=CNP PE=1 SV=2;tr|K7ERZ0|K7ERZ0_HUMAN 2,3-cyclic-nucleotide 3-phosphodiesterase (Fragment) OS=Homo sapiens OX=9606 GN=CNP PE=1 SV=8;tr|K7EN66|K7EN66	3	18	1	1	12	10	6	7	5	4	4	0	1	0	0	0	4	7	5	5	3	3	4	4	3	0	1	1	0	0	0	0	0	0	0	0	0	0	0	0	0	0
CON__A2I7N1;CON__A2I7N0;CON__Q9TTE1;CON__A2I7N3	CON__A2I7N1;CON__A2I7N0;CON__Q9TTE1	3;2;2;1	3;2;2;1	2;2;1;0			;;	4	3	3	2	1	0	0	1	0	0	1	0	0	0	0	3	0	0	0	0	0	0	0	0	0	1	0	0	1	0	0	1	0	0	0	0	3	0	0	0	0	0
CON__ENSEMBL:ENSBTAP00000001528;H7C3F1;C9J1A4	CON__ENSEMBL:ENSBTAP00000001528	14;1;1	1;0;0	1;0;0				3	14	1	1	6	5	1	2	1	1	1	0	0	0	0	0	4	5	8	4	5	4	2	2	1	0	1	0	0	0	0	0	0	0	0	0	0	0	0	0	0	0
CON__ENSEMBL:ENSBTAP00000007350;A0A3B3ISD7	CON__ENSEMBL:ENSBTAP00000007350	12;1	1;0	1;0				2	12	1	1	3	3	1	1	2	0	2	1	0	0	0	6	0	2	3	1	0	0	0	0	0	0	0	0	0	0	0	0	0	0	0	0	1	0	0	0	0	0
CON__ENSEMBL:ENSBTAP00000018574	CON__ENSEMBL:ENSBTAP00000018574	4	4	4				1	4	4	4	1	1	0	1	1	1	2	0	0	0	0	4	0	1	0	0	0	0	0	0	0	1	1	0	1	1	1	2	0	0	0	0	4	0	1	0	0	0
CON__ENSEMBL:ENSBTAP00000024146;P01023;P20742;F5GXY0	CON__ENSEMBL:ENSBTAP00000024146	42;3;2;1	42;3;2;1	42;3;2;1				4	42	42	42	5	8	3	4	4	2	10	0	1	0	0	31	0	1	0	0	0	0	1	0	1	5	8	3	4	4	2	10	0	1	0	0	31	0	1	0	0	0
CON__ENSEMBL:ENSBTAP00000025008;Q9H4B7	CON__ENSEMBL:ENSBTAP00000025008;Q9H4B7	19;10	19;10	15;6	Tubulin beta-1 chain	TUBB1	;sp|Q9H4B7|TBB1_HUMAN Tubulin beta-1 chain OS=Homo sapiens OX=9606 GN=TUBB1 PE=1 SV=1	2	19	19	15	12	9	6	6	8	7	11	0	0	0	0	10	6	6	9	4	5	3	3	5	3	12	9	6	6	8	7	11	0	0	0	0	10	6	6	9	4	5
CON__ENSEMBL:ENSBTAP00000037665	CON__ENSEMBL:ENSBTAP00000037665	2	2	2				1	2	2	2	0	0	0	0	0	0	0	0	0	0	0	2	0	0	0	0	0	0	0	0	0	0	0	0	0	0	0	0	0	0	0	0	2	0	0	0	0	0
CON__ENSEMBL:ENSBTAP00000038329	CON__ENSEMBL:ENSBTAP00000038329	1	1	1				1	1	1	1	0	0	0	0	0	0	0	0	0	0	0	1	0	0	0	0	0	0	0	0	0	0	0	0	0	0	0	0	0	0	0	0	1	0	0	0	0	0
CON__P00735;E9PIT3;P00734;C9JV37	CON__P00735	37;6;6;1	37;6;6;1	37;6;6;1				4	37	37	37	13	17	11	5	16	10	10	0	2	0	0	11	17	20	22	19	14	14	6	8	4	13	17	11	5	16	10	10	0	2	0	0	11	17	20	22	19	14
CON__P00761	CON__P00761	2	2	2				1	2	2	2	2	1	1	1	1	2	1	1	1	2	2	1	1	2	0	2	2	1	2	1	1	2	1	1	1	1	2	1	1	1	2	2	1	1	2	0	2	2
CON__P00978	CON__P00978	4	4	4				1	4	4	4	1	1	2	1	1	1	1	0	0	0	0	3	0	0	1	0	0	0	0	0	0	1	1	2	1	1	1	1	0	0	0	0	3	0	0	1	0	0
CON__P01030	CON__P01030	12	12	1				1	12	12	1	3	3	1	1	2	0	2	1	0	0	0	6	0	2	3	1	0	0	0	0	0	3	3	1	1	2	0	2	1	0	0	0	6	0	2	3	1	0
CON__P01966	CON__P01966	6	6	3				1	6	6	3	4	1	4	2	4	3	5	2	3	2	2	3	4	4	3	4	3	4	3	4	4	4	1	4	2	4	3	5	2	3	2	2	3	4	4	3	4	3
CON__P02070	CON__P02070	8	4	4				1	8	4	4	2	2	2	2	2	2	3	2	2	2	2	4	3	5	6	3	4	3	3	3	1	0	0	0	0	0	0	1	0	0	0	0	1	1	1	3	1	1
CON__P02533;P02533;CON__A2A4G1;CON__P08727;P08727;C9JM50;CON__P19001;A8MT21;K7ENV3;CON__Q61782;K7EMS3;C9JTG5;CON__P35900;CON__Q9D312;P35900;CON__Q8N1A0;Q8N1A0	CON__P02533;P02533	29;29;9;7;7;6;6;4;3;3;3;2;2;2;2;1;1	14;14;0;1;1;1;0;0;0;1;1;0;0;0;0;0;0	4;4;0;0;0;0;0;0;0;1;0;0;0;0;0;0;0	Keratin, type I cytoskeletal 14	KRT14	;sp|P02533|K1C14_HUMAN Keratin, type I cytoskeletal 14 OS=Homo sapiens OX=9606 GN=KRT14 PE=1 SV=4	17	29	14	4	4	4	3	1	0	0	1	0	0	12	9	17	14	20	15	19	14	20	14	10	11	1	1	0	0	0	0	0	0	0	5	3	9	6	10	6	9	5
CON__P02538;P02538;CON__Q8VED5;CON__Q14CN4-1;CON__Q6IME9;Q14CN4;CON__P19013;P19013	CON__P02538;P02538	26;26;7;4;4;4;2;2	2;2;0;0;0;0;0;0	2;2;0;0;0;0;0;0	Keratin, type II cytoskeletal 6A	KRT6A	;sp|P02538|K2C6A_HUMAN Keratin, type II cytoskeletal 6A OS=Homo sapiens OX=9606 GN=KRT6A PE=1 SV=3	8	26	2	2	5	4	3	2	1	2	1	1	0	10	8	9	11	14	11	18	11	11	5	13	11	0	0	0	0	0	0	0	0	0	1	1	0	1	1	1	2	0
CON__P02662	CON__P02662	5	5	5				1	5	5	5	3	3	3	0	2	4	2	0	0	1	1	2	3	3	3	2	3	2	3	4	2	3	3	3	0	2	4	2	0	0	1	1	2	3	3	3	2	3
CON__P02663	CON__P02663	3	3	3				1	3	3	3	0	0	0	3	1	1	2	0	0	2	1	3	2	2	1	2	2	2	1	2	1	0	0	0	3	1	1	2	0	0	2	1	3	2	2	1	2	2
CON__P02666	CON__P02666	3	3	3				1	3	3	3	1	0	0	0	1	1	1	0	0	1	0	1	1	2	2	0	0	0	1	0	0	1	0	0	0	1	1	1	0	0	1	0	1	1	2	2	0	0
CON__P02668	CON__P02668	2	2	2				1	2	2	2	0	0	0	0	0	0	0	0	0	1	1	1	2	2	2	1	0	2	0	2	2	0	0	0	0	0	0	0	0	0	1	1	1	2	2	2	1	0
CON__P02672	CON__P02672	5	5	5				1	5	5	5	0	0	0	1	2	0	3	1	0	0	0	3	1	1	1	0	0	0	1	0	0	0	0	0	1	2	0	3	1	0	0	0	3	1	1	1	0	0
CON__P02676	CON__P02676	11	11	11				1	11	11	11	1	0	0	0	3	0	2	0	0	0	0	8	3	0	4	1	0	0	3	0	1	1	0	0	0	3	0	2	0	0	0	0	8	3	0	4	1	0
CON__P02754	CON__P02754	2	2	2				1	2	2	2	0	0	0	0	1	0	1	0	0	0	0	1	1	2	1	1	1	1	1	1	1	0	0	0	0	1	0	1	0	0	0	0	1	1	2	1	1	1
CON__P02769	CON__P02769	62	62	57				1	62	62	57	32	22	25	10	17	13	23	4	4	8	7	38	16	20	22	21	17	15	13	13	11	32	22	25	10	17	13	23	4	4	8	7	38	16	20	22	21	17
CON__P04259	CON__P04259	27	15	0				1	27	15	0	5	4	3	2	1	2	1	1	0	9	7	9	11	13	11	17	13	10	7	13	12	2	1	2	1	0	0	0	0	0	5	3	5	5	6	4	10	7
CON__P06868;P00747	CON__P06868	36;2	36;2	36;2				2	36	36	36	12	10	4	9	8	9	16	2	2	0	0	22	7	10	15	7	8	5	7	5	1	12	10	4	9	8	9	16	2	2	0	0	22	7	10	15	7	8
CON__P07224	CON__P07224	2	2	2				1	2	2	2	0	1	0	1	1	0	1	0	0	0	0	0	0	0	0	0	0	0	0	0	0	0	1	0	1	1	0	1	0	0	0	0	0	0	0	0	0	0
CON__P08779;P08779;CON__Q9Z2K1;CON__Q3ZAW8;K7ENW6	CON__P08779;P08779	31;31;10;10;9	26;26;8;8;9	16;16;4;4;7	Keratin, type I cytoskeletal 16	KRT16	;sp|P08779|K1C16_HUMAN Keratin, type I cytoskeletal 16 OS=Homo sapiens OX=9606 GN=KRT16 PE=1 SV=4	5	31	26	16	3	3	3	1	0	0	1	0	0	12	9	14	14	20	18	25	14	19	8	9	9	1	0	2	1	0	0	0	0	0	9	6	12	12	17	15	22	11
CON__P12763;P02765;C9JV77	CON__P12763	16;3;1	16;3;1	16;3;1				3	16	16	16	9	12	8	9	11	9	8	1	2	1	1	8	5	6	4	2	3	4	5	3	4	9	12	8	9	11	9	8	1	2	1	1	8	5	6	4	2	3
CON__P13645;P13645;CON__P02535-1;A0A3B3ITG2;CON__P05784;CON__Q7Z3Z0;CON__Q99456;CON__Q2M2I5;Q7Z3Z0;Q99456;Q2M2I5;F8VZY9;CON__Q92764;C4AM86;CON__Q14532;CON__A2AB72;CON__O76015;CON__O76013;CON__Q7Z3Y9;CON__O76014;P05783;Q14532;O76014;Q92764;O76015;O76013;Q7Z3Y9	CON__P13645;P13645	36;36;10;2;2;2;2;2;2;2;2;1;1;1;1;1;1;1;1;1;1;1;1;1;1;1;1	35;35;10;1;1;2;1;2;2;1;2;1;1;1;1;1;1;1;1;1;1;1;1;1;1;1;1	27;27;6;0;0;0;0;0;0;0;0;0;0;0;0;0;0;0;0;0;0;0;0;0;0;0;0	Keratin, type I cytoskeletal 10	KRT10	;sp|P13645|K1C10_HUMAN Keratin, type I cytoskeletal 10 OS=Homo sapiens OX=9606 GN=KRT10 PE=1 SV=6	27	36	35	27	15	17	10	7	10	6	11	2	1	20	19	20	19	29	25	21	21	23	21	20	21	15	17	10	7	10	6	11	2	1	20	19	20	19	29	25	21	20
CON__P13646-1	CON__P13646-1	12	7	2				1	12	7	2	1	1	0	1	1	0	1	0	0	3	3	5	5	7	6	5	6	9	5	4	3	0	0	0	0	0	0	0	0	0	0	0	1	1	3	1	1	1
CON__P13647;P13647;F8W0C6;H0YIN9;H0YI76;F8VV57;F8VUG2;F8W1U3;CON__P05787;P05787;CON__Q9DCV7;CON__Q3KNV1;CON__P08729;CON__P07744;CON__Q9NSB2;CON__Q6ISB0;P08729;Q9NSB2;CON__Q3SY84;CON__Q7RTS7;CON__Q32MB2;F8W1S1;Q3SY84;Q7RTS7;Q86Y46;H0YHD9;F8VU69;F8VS61;CON__Q9H552	CON__P13647;P13647	30;30;13;12;9;5;4;4;4;4;3;3;3;3;3;3;3;3;2;2;2;2;2;2;2;1;1;1;1	25;25;9;11;8;5;0;0;0;0;0;0;0;0;0;0;0;0;0;0;0;0;0;0;0;0;1;0;0	5;5;0;1;2;2;0;0;0;0;0;0;0;0;0;0;0;0;0;0;0;0;0;0;0;0;0;0;0	Keratin, type II cytoskeletal 5	KRT5	;sp|P13647|K2C5_HUMAN Keratin, type II cytoskeletal 5 OS=Homo sapiens OX=9606 GN=KRT5 PE=1 SV=3	29	30	25	5	5	7	4	2	2	2	4	0	0	8	7	13	18	18	19	20	19	16	13	15	15	3	5	3	2	1	1	4	0	0	7	6	11	16	16	16	18	17
CON__P15497	CON__P15497	12	12	12				1	12	12	12	2	1	0	0	0	0	2	0	0	0	0	6	3	3	7	3	3	3	3	3	1	2	1	0	0	0	0	2	0	0	0	0	6	3	3	7	3	3
CON__P17690	CON__P17690	7	7	7				1	7	7	7	4	2	3	1	1	1	2	1	0	0	0	2	0	0	1	0	0	0	0	0	0	4	2	3	1	1	1	2	1	0	0	0	2	0	0	1	0	0
CON__P17697	CON__P17697	3	3	3				1	3	3	3	0	0	1	0	0	0	2	0	0	0	0	2	0	0	0	0	0	0	0	0	0	0	0	1	0	0	0	2	0	0	0	0	2	0	0	0	0	0
CON__P28800	CON__P28800	2	2	2				1	2	2	2	1	1	0	1	0	0	2	1	0	0	0	1	0	0	0	0	0	0	0	0	0	1	1	0	1	0	0	2	1	0	0	0	1	0	0	0	0	0
CON__P34955	CON__P34955	10	10	10				1	10	10	10	2	4	3	1	1	2	3	0	0	0	0	5	3	4	4	3	2	2	3	1	1	2	4	3	1	1	2	3	0	0	0	0	5	3	4	4	3	2
CON__P35908;CON__Q5XKE5;Q5XKE5;CON__Q9R0H5;H0YID6	CON__P35908	44;6;6;3;2	1;0;0;0;0	1;0;0;0;0				5	44	1	1	19	23	11	10	9	10	13	4	2	15	13	20	22	26	25	23	21	22	17	19	17	1	1	1	0	1	0	0	0	0	0	0	0	1	0	1	1	1
CON__P35908v2;P35908	CON__P35908v2;P35908	44;44	42;42	1;1	Keratin, type II cytoskeletal 2 epidermal	KRT2	;sp|P35908|K22E_HUMAN Keratin, type II cytoskeletal 2 epidermal OS=Homo sapiens OX=9606 GN=KRT2 PE=1 SV=2	2	44	42	1	19	23	11	10	9	10	13	4	2	16	14	21	22	26	25	23	21	23	18	20	17	18	21	10	9	8	9	12	4	2	14	12	19	21	25	24	21	19
CON__P41361;Q8TCE1;P01008	CON__P41361	6;1;1	6;1;1	6;1;1				3	6	6	6	0	0	0	0	0	0	5	0	0	0	0	4	0	0	0	0	0	0	0	0	0	0	0	0	0	0	0	5	0	0	0	0	4	0	0	0	0	0
CON__P48668;P48668	CON__P48668;P48668	26;26	1;1	0;0	Keratin, type II cytoskeletal 6C	KRT6C	;sp|P48668|K2C6C_HUMAN Keratin, type II cytoskeletal 6C OS=Homo sapiens OX=9606 GN=KRT6C PE=1 SV=3	2	26	1	0	5	4	3	2	1	2	1	1	0	10	8	10	11	13	11	17	12	10	7	14	12	0	0	0	0	0	0	0	0	0	1	1	1	0	0	0	1	0
CON__Q03247	CON__Q03247	5	5	5				1	5	5	5	3	3	2	2	2	3	3	1	3	0	0	2	0	1	2	0	0	0	0	0	0	3	3	2	2	2	3	3	1	3	0	0	2	0	1	2	0	0
CON__Q04695;Q04695;F5GWP8;K7EPJ9;K7ESE1;A0A3B3IS58	CON__Q04695;Q04695;F5GWP8	17;17;14;7;4;3	6;6;5;2;1;1	2;2;2;1;0;0	Keratin, type I cytoskeletal 17	KRT17	;sp|Q04695|K1C17_HUMAN Keratin, type I cytoskeletal 17 OS=Homo sapiens OX=9606 GN=KRT17 PE=1 SV=2;tr|F5GWP8|F5GWP8_HUMAN Keratin, type I cytoskeletal 17 OS=Homo sapiens OX=9606 GN=KRT17 PE=1 SV=2	6	17	6	2	3	2	2	1	0	0	1	0	0	5	5	7	6	7	7	14	7	9	6	4	7	0	0	0	0	0	0	0	0	0	0	1	1	1	1	1	6	1
CON__Q05443	CON__Q05443	3	3	3				1	3	3	3	0	0	0	0	0	0	1	1	0	0	0	1	0	1	1	0	0	0	0	0	0	0	0	0	0	0	0	1	1	0	0	0	1	0	1	1	0	0
CON__Q05B55	CON__Q05B55	2	2	2				1	2	2	2	0	0	0	0	0	0	0	0	0	0	0	1	1	1	0	0	0	0	0	0	0	0	0	0	0	0	0	0	0	0	0	0	1	1	1	0	0	0
CON__Q0V8M9;A0A087WW43;E7ET33;Q06033	CON__Q0V8M9	6;2;2;2	6;2;2;2	6;2;2;2				4	6	6	6	1	1	0	0	2	0	1	0	0	0	0	3	2	2	1	1	1	0	1	0	0	1	1	0	0	2	0	1	0	0	0	0	3	2	2	1	1	1
CON__Q0VCM5	CON__Q0VCM5	4	4	4				1	4	4	4	0	0	0	0	0	0	0	0	0	0	0	4	0	0	0	0	0	0	0	0	0	0	0	0	0	0	0	0	0	0	0	0	4	0	0	0	0	0
CON__Q1A7A4	CON__Q1A7A4	1	1	1				1	1	1	1	0	0	0	0	0	0	1	0	0	0	0	1	0	0	0	0	0	0	0	0	0	0	0	0	0	0	0	1	0	0	0	0	1	0	0	0	0	0
CON__Q1RMK2	CON__Q1RMK2	13	13	13				1	13	13	13	5	6	3	2	3	1	2	0	0	0	1	7	3	9	7	1	4	1	3	2	1	5	6	3	2	3	1	2	0	0	0	1	7	3	9	7	1	4
CON__Q28085	CON__Q28085	3	3	3				1	3	3	3	0	0	0	0	0	0	2	0	0	0	0	0	0	0	1	0	0	0	0	0	0	0	0	0	0	0	0	2	0	0	0	0	0	0	0	1	0	0
CON__Q28107;A0A0A0MRJ7;P12259	CON__Q28107	29;4;4	29;4;4	29;4;4				3	29	29	29	9	10	2	1	6	2	8	2	1	0	0	6	8	12	17	3	3	4	1	3	1	9	10	2	1	6	2	8	2	1	0	0	6	8	12	17	3	3
CON__Q29443;CON__Q0IIK2	CON__Q29443;CON__Q0IIK2	34;34	34;34	32;32			;	2	34	34	32	5	5	4	0	1	1	3	0	0	0	0	30	0	0	0	0	0	0	0	0	0	5	5	4	0	1	1	3	0	0	0	0	30	0	0	0	0	0
CON__Q29RQ1	CON__Q29RQ1	5	5	5				1	5	5	5	0	0	0	0	0	0	1	0	0	0	0	4	0	0	0	0	0	0	0	0	0	0	0	0	0	0	0	1	0	0	0	0	4	0	0	0	0	0
CON__Q2KIF2	CON__Q2KIF2	4	4	4				1	4	4	4	1	1	0	0	1	0	0	0	0	0	0	2	0	0	0	0	0	0	0	0	0	1	1	0	0	1	0	0	0	0	0	0	2	0	0	0	0	0
CON__Q2KIG3	CON__Q2KIG3	2	2	2				1	2	2	2	0	0	0	0	0	0	0	1	0	0	0	1	0	0	0	0	0	0	0	0	0	0	0	0	0	0	0	0	1	0	0	0	1	0	0	0	0	0
CON__Q2KJ83;P15169	CON__Q2KJ83	4;1	4;1	4;1				2	4	4	4	1	0	0	1	2	0	3	0	1	0	0	1	0	1	2	0	0	0	0	0	0	1	0	0	1	2	0	3	0	1	0	0	1	0	1	2	0	0
CON__Q2KJF1;M0R009;P04217	CON__Q2KJF1	15;1;1	15;1;1	15;1;1				3	15	15	15	8	5	4	3	4	2	4	1	2	0	0	8	0	2	2	0	1	0	0	1	0	8	5	4	3	4	2	4	1	2	0	0	8	0	2	2	0	1
CON__Q2UVX4;M0QXZ3;M0QYC8	CON__Q2UVX4	55;1;1	55;1;1	50;0;0				3	55	55	50	17	21	12	10	14	6	21	5	5	0	0	29	7	17	20	8	9	8	9	8	5	17	21	12	10	14	6	21	5	5	0	0	29	7	17	20	8	9
CON__Q3KUS7	CON__Q3KUS7	15	15	15				1	15	15	15	6	5	2	3	3	4	6	1	1	0	0	6	2	3	2	1	0	0	0	2	0	6	5	2	3	3	4	6	1	1	0	0	6	2	3	2	1	0
CON__Q3MHH8;P19961;P04746;P04745	CON__Q3MHH8	3;1;1;1	3;1;1;1	3;1;1;1				4	3	3	3	1	0	0	0	0	0	1	0	0	0	0	1	0	0	0	0	0	0	0	0	0	1	0	0	0	0	0	1	0	0	0	0	1	0	0	0	0	0
CON__Q3MHN2;P02748	CON__Q3MHN2;P02748	2;2	2;2	2;2	Complement component C9;Complement component C9a;Complement component C9b	C9	;sp|P02748|CO9_HUMAN Complement component C9 OS=Homo sapiens OX=9606 GN=C9 PE=1 SV=2	2	2	2	2	0	0	0	0	1	0	1	0	0	0	0	0	0	0	0	0	0	0	0	0	0	0	0	0	0	1	0	1	0	0	0	0	0	0	0	0	0	0
CON__Q3MHN5;CON__ENSEMBL:ENSBTAP00000018229;D6RF35;P02774;D6RBJ7	CON__Q3MHN5;CON__ENSEMBL:ENSBTAP00000018229	5;5;2;2;1	5;5;2;2;1	5;5;2;2;1			;	5	5	5	5	0	1	1	0	1	0	1	0	0	0	0	4	0	0	0	0	0	0	0	0	0	0	1	1	0	1	0	1	0	0	0	0	4	0	0	0	0	0
CON__Q3SX09;A0A2R8Y7X9;P69892;P69891;P02100	CON__Q3SX09	15;1;1;1;1	15;1;1;1;1	10;0;0;0;0				5	15	15	10	6	4	4	5	5	4	8	2	3	7	5	8	12	14	13	12	12	10	10	10	6	6	4	4	5	5	4	8	2	3	7	5	8	12	14	13	12	12
CON__Q3SX14;A0A0A0MS51;A0A0A0MT01;P06396;Q5T0I0;A0A0U1RQL8	CON__Q3SX14;A0A0A0MS51;A0A0A0MT01;P06396	16;10;10;10;6;4	16;10;10;10;6;4	16;10;10;10;6;4	Gelsolin	GSN	;tr|A0A0A0MS51|A0A0A0MS51_HUMAN Actin-depolymerizing factor OS=Homo sapiens OX=9606 GN=GSN PE=1 SV=1;tr|A0A0A0MT01|A0A0A0MT01_HUMAN Actin-depolymerizing factor OS=Homo sapiens OX=9606 GN=GSN PE=1 SV=1;sp|P06396|GELS_HUMAN Gelsolin OS=Homo sapiens OX=9606 G	6	16	16	16	6	8	5	3	3	3	2	0	0	0	0	10	5	6	7	3	0	1	1	3	1	6	8	5	3	3	3	2	0	0	0	0	10	5	6	7	3	0
CON__Q3SZ57;J3KMX3;P02771	CON__Q3SZ57	21;2;2	21;2;2	21;2;2				3	21	21	21	4	7	3	2	3	1	6	1	0	0	0	14	4	3	7	5	3	0	1	3	2	4	7	3	2	3	1	6	1	0	0	0	14	4	3	7	5	3
CON__Q3SZH5	CON__Q3SZH5	10	10	10				1	10	10	10	5	5	4	3	6	4	6	0	1	0	0	6	3	2	4	3	1	2	2	2	2	5	5	4	3	6	4	6	0	1	0	0	6	3	2	4	3	1
CON__Q3SZR3	CON__Q3SZR3	1	1	1				1	1	1	1	1	1	0	0	0	0	0	0	0	0	0	1	0	0	0	0	0	0	0	0	0	1	1	0	0	0	0	0	0	0	0	0	1	0	0	0	0	0
CON__Q3T052	CON__Q3T052	12	12	12				1	12	12	12	1	2	0	1	1	1	4	0	0	0	0	9	1	2	1	0	0	0	1	1	0	1	2	0	1	1	1	4	0	0	0	0	9	1	2	1	0	0
CON__Q3Y5Z3	CON__Q3Y5Z3	2	2	2				1	2	2	2	0	0	0	0	0	0	0	0	0	0	0	2	0	0	0	0	0	0	0	0	0	0	0	0	0	0	0	0	0	0	0	0	2	0	0	0	0	0
CON__Q3ZBD7	CON__Q3ZBD7	1	1	1				1	1	1	1	0	0	0	0	0	0	1	0	0	0	0	0	0	0	0	0	0	0	0	0	0	0	0	0	0	0	0	1	0	0	0	0	0	0	0	0	0	0
CON__Q3ZBS7;P04004	CON__Q3ZBS7	11;2	11;2	11;2				2	11	11	11	4	4	4	3	4	5	4	0	0	2	0	7	1	2	4	1	1	1	4	4	3	4	4	4	3	4	5	4	0	0	2	0	7	1	2	4	1	1
CON__Q58D62	CON__Q58D62	8	8	8				1	8	8	8	3	1	1	1	2	1	7	0	0	0	0	6	0	1	2	0	0	0	0	1	1	3	1	1	1	2	1	7	0	0	0	0	6	0	1	2	0	0
CON__Q5D862;Q5D862	CON__Q5D862;Q5D862	2;2	2;2	2;2	Filaggrin-2	FLG2	;sp|Q5D862|FILA2_HUMAN Filaggrin-2 OS=Homo sapiens OX=9606 GN=FLG2 PE=1 SV=1	2	2	2	2	0	0	0	0	0	0	0	0	0	0	0	0	1	1	1	2	1	1	1	1	1	0	0	0	0	0	0	0	0	0	0	0	0	1	1	1	2	1
CON__Q7Z3Y7;Q7Z3Y7;CON__Q148H6	CON__Q7Z3Y7;Q7Z3Y7;CON__Q148H6	5;5;4	1;1;1	0;0;0	Keratin, type I cytoskeletal 28	KRT28	;sp|Q7Z3Y7|K1C28_HUMAN Keratin, type I cytoskeletal 28 OS=Homo sapiens OX=9606 GN=KRT28 PE=1 SV=2;	3	5	1	0	1	3	1	0	0	0	2	0	0	3	3	3	2	3	3	4	3	4	3	2	3	0	0	0	0	0	0	0	0	0	0	0	1	0	0	0	0	0
CON__Q7Z3Y8;Q7Z3Y8	CON__Q7Z3Y8;Q7Z3Y8	4;4	1;1	1;1	Keratin, type I cytoskeletal 27	KRT27	;sp|Q7Z3Y8|K1C27_HUMAN Keratin, type I cytoskeletal 27 OS=Homo sapiens OX=9606 GN=KRT27 PE=1 SV=2	2	4	1	1	0	2	0	0	0	0	1	0	0	2	2	4	2	2	2	2	2	2	2	2	2	0	0	0	0	0	0	0	0	0	0	0	1	0	0	0	0	0
CON__Q86YZ3;Q86YZ3	CON__Q86YZ3;Q86YZ3	2;2	2;2	2;2	Hornerin	HRNR	;sp|Q86YZ3|HORN_HUMAN Hornerin OS=Homo sapiens OX=9606 GN=HRNR PE=1 SV=2	2	2	2	2	0	0	0	0	0	0	0	0	0	0	0	1	1	2	2	2	1	2	1	1	1	0	0	0	0	0	0	0	0	0	0	0	1	1	2	2	2	1
CON__Q8N1N4-2;CON__Q7RTT2;Q8N1N4	CON__Q8N1N4-2;CON__Q7RTT2;Q8N1N4	2;2;2	2;2;2	2;2;2	Keratin, type II cytoskeletal 78	KRT78	;;sp|Q8N1N4|K2C78_HUMAN Keratin, type II cytoskeletal 78 OS=Homo sapiens OX=9606 GN=KRT78 PE=1 SV=2	3	2	2	2	0	0	0	0	0	0	0	0	0	0	0	0	1	1	1	1	1	1	0	0	0	0	0	0	0	0	0	0	0	0	0	0	0	1	1	1	1	1
CON__Q95121;P36955;I3L4F9;I3L107;I3L4N7;I3L425;I3L3Z3;I3L1U4;I3L4Z0;I3L2R7	CON__Q95121	11;5;2;2;2;1;1;1;1;1	11;5;2;2;2;1;1;1;1;1	11;5;2;2;2;1;1;1;1;1				10	11	11	11	2	2	0	1	6	1	7	1	0	0	0	6	1	3	1	1	1	0	4	0	0	2	2	0	1	6	1	7	1	0	0	0	6	1	3	1	1	1
CON__Q95M17	CON__Q95M17	1	1	1				1	1	1	1	0	0	0	0	0	0	0	0	0	0	0	1	0	0	0	0	0	0	0	0	0	0	0	0	0	0	0	0	0	0	0	0	1	0	0	0	0	0
CON__Q9TRI1;Q5T985;P19823	CON__Q9TRI1	16;2;2	16;2;2	16;2;2				3	16	16	16	1	4	3	3	3	1	7	1	0	0	0	9	1	2	3	1	0	1	3	1	1	1	4	3	3	3	1	7	1	0	0	0	9	1	2	3	1	0
D6RBF1;C9J6J8;E3W990;E7EMC7;Q13501	D6RBF1;C9J6J8;E3W990;E7EMC7;Q13501	2;2;2;2;2	2;2;2;2;2	2;2;2;2;2	Sequestosome-1	SQSTM1	tr|D6RBF1|D6RBF1_HUMAN Sequestosome-1 OS=Homo sapiens OX=9606 GN=SQSTM1 PE=1 SV=1;tr|C9J6J8|C9J6J8_HUMAN Sequestosome-1 OS=Homo sapiens OX=9606 GN=SQSTM1 PE=1 SV=2;tr|E3W990|E3W990_HUMAN Sequestosome-1 (Fragment) OS=Homo sapiens OX=9606 GN=SQSTM1 PE=1 SV=1	5	2	2	2	1	0	1	0	0	0	0	0	0	0	0	0	0	0	0	0	0	0	0	0	0	1	0	1	0	0	0	0	0	0	0	0	0	0	0	0	0	0
D6RDA3;D6RHC7;D6RHX8;F8W9W2;P43250	D6RDA3;D6RHC7;D6RHX8;F8W9W2;P43250	1;1;1;1;1	1;1;1;1;1	1;1;1;1;1	G protein-coupled receptor kinase 6	GRK6	tr|D6RDA3|D6RDA3_HUMAN G protein-coupled receptor kinase 6 (Fragment) OS=Homo sapiens OX=9606 GN=GRK6 PE=1 SV=1;tr|D6RHC7|D6RHC7_HUMAN G protein-coupled receptor kinase (Fragment) OS=Homo sapiens OX=9606 GN=GRK6 PE=1 SV=1;tr|D6RHX8|D6RHX8_HUMAN G protein-c	5	1	1	1	1	0	0	0	0	0	0	0	0	0	0	0	0	0	0	0	0	0	0	0	0	1	0	0	0	0	0	0	0	0	0	0	0	0	0	0	0	0
D6RG08;E9PB77;E7EMF1;E7ESP4;P17301	D6RG08;E9PB77;E7EMF1;E7ESP4;P17301	2;2;2;2;2	2;2;2;2;2	2;2;2;2;2	Integrin alpha-2	ITGA2	tr|D6RG08|D6RG08_HUMAN Integrin alpha-2 OS=Homo sapiens OX=9606 GN=ITGA2 PE=1 SV=1;tr|E9PB77|E9PB77_HUMAN Integrin alpha-2 OS=Homo sapiens OX=9606 GN=ITGA2 PE=1 SV=1;tr|E7EMF1|E7EMF1_HUMAN Integrin alpha-2 OS=Homo sapiens OX=9606 GN=ITGA2 PE=1 SV=1;tr|E7ES	5	2	2	2	1	1	0	0	0	0	0	0	0	0	0	0	0	0	0	0	0	0	0	0	0	1	1	0	0	0	0	0	0	0	0	0	0	0	0	0	0	0
E5RI99;P62888;A0A0B4J213;E5RJH3;A0A0C4DH44	E5RI99;P62888;A0A0B4J213;E5RJH3;A0A0C4DH44	2;2;1;1;1	2;2;1;1;1	2;2;1;1;1	60S ribosomal protein L30	RPL30	tr|E5RI99|E5RI99_HUMAN 60S ribosomal protein L30 (Fragment) OS=Homo sapiens OX=9606 GN=RPL30 PE=1 SV=1;sp|P62888|RL30_HUMAN 60S ribosomal protein L30 OS=Homo sapiens OX=9606 GN=RPL30 PE=1 SV=2;tr|A0A0B4J213|A0A0B4J213_HUMAN 60S ribosomal protein L30 OS=Hom	5	2	2	2	0	0	0	0	0	0	0	0	0	0	1	2	0	0	0	0	0	0	0	0	0	0	0	0	0	0	0	0	0	0	0	1	2	0	0	0	0	0
E5RIP4;Q15043;E5RFZ8;E5RGA7;E5RJ40;E5RJG5	E5RIP4;Q15043;E5RFZ8;E5RGA7;E5RJ40;E5RJG5	2;2;1;1;1;1	2;2;1;1;1;1	2;2;1;1;1;1	Zinc transporter ZIP14	SLC39A14	tr|E5RIP4|E5RIP4_HUMAN Metal cation symporter ZIP14 (Fragment) OS=Homo sapiens OX=9606 GN=SLC39A14 PE=1 SV=2;sp|Q15043|S39AE_HUMAN Metal cation symporter ZIP14 OS=Homo sapiens OX=9606 GN=SLC39A14 PE=1 SV=3;tr|E5RFZ8|E5RFZ8_HUMAN Metal cation symporter ZIP1	6	2	2	2	1	1	0	0	0	0	0	0	0	0	0	0	0	2	1	1	1	0	1	0	0	1	1	0	0	0	0	0	0	0	0	0	0	0	2	1	1	1
E5RIU6;A0A087WZZ9;A0A024QZP7;P06493;F8VXD2;A0A2R8YEB7;K7ELV5;F8VYH9;F8VZZ0;F8VTV8;F8VWX7;F8VZ51;K7EJ83;E7ESI2;A0A2R8Y644;H0YAZ9;Q9BVE2;E7EUK8;G3V5T9;E5RGN0;A0A087X209;A0A087WZU2;A0A2R8YD28;F5H6Z0;A0A2R8YF61;A0A2R8Y7W5;J3QSD7;A0A2R8Y4Z0;Q00535;P24941;P11802;Q00526;Q00534;P50750;Q96Q40;O94921;Q07002;Q00536;Q00537;Q9NYV4;Q14004	E5RIU6;A0A087WZZ9;A0A024QZP7;P06493;F8VXD2;A0A2R8YEB7;K7ELV5;F8VYH9;F8VZZ0;F8VTV8;F8VWX7;F8VZ51;K7EJ83;E7ESI2;A0A2R8Y644;H0YAZ9;Q9BVE2;E7EUK8;G3V5T9;E5RGN0;A0A087X209;A0A087WZU2;A0A2R8YD28;F5H6Z0;A0A2R8YF61;A0A2R8Y7W5;J3QSD7;A0A2R8Y4Z0;Q00535;P24941;P11802;Q00526;Q00534;P50750;Q96Q40;O94921;Q07002;Q00536;Q00537;Q9NYV4;Q14004	2;2;2;2;1;1;1;1;1;1;1;1;1;1;1;1;1;1;1;1;1;1;1;1;1;1;1;1;1;1;1;1;1;1;1;1;1;1;1;1;1	2;2;2;2;1;1;1;1;1;1;1;1;1;1;1;1;1;1;1;1;1;1;1;1;1;1;1;1;1;1;1;1;1;1;1;1;1;1;1;1;1	2;2;2;2;1;1;1;1;1;1;1;1;1;1;1;1;1;1;1;1;1;1;1;1;1;1;1;1;1;1;1;1;1;1;1;1;1;1;1;1;1	Cyclin-dependent kinase 1;Cyclin-dependent-like kinase 5;Cyclin-dependent kinase 2;Cyclin-dependent kinase 4;Cyclin-dependent kinase 3;Cyclin-dependent kinase 6;Cyclin-dependent kinase 9;Cyclin-dependent kinase 15;Cyclin-dependent kinase 14;Cyclin-dependent kinase 18;Cyclin-dependent kinase 16;Cyclin-dependent kinase 17;Cyclin-dependent kinase 12;Cyclin-dependent kinase 13	CDK1;CDC2;CDK4;CDK3;CDK2;CDK16;CDK13;CDK14;CDK17;CDK12;CDK5;CDK6;CDK9;CDK15;CDK18	tr|E5RIU6|E5RIU6_HUMAN Cyclin-dependent kinase 1 (Fragment) OS=Homo sapiens OX=9606 GN=CDK1 PE=1 SV=2;tr|A0A087WZZ9|A0A087WZZ9_HUMAN Cyclin-dependent kinase 1 OS=Homo sapiens OX=9606 GN=CDK1 PE=1 SV=1;tr|A0A024QZP7|A0A024QZP7_HUMAN Cell division cycle 2, G	41	2	2	2	0	1	0	1	1	0	1	0	0	0	0	0	1	1	0	0	0	1	0	0	0	0	1	0	1	1	0	1	0	0	0	0	0	1	1	0	0	0
E5RJ10;E5RHB8;E5RJX6;E5RG91;Q8NEZ2	E5RJ10;E5RHB8;E5RJX6;E5RG91;Q8NEZ2	1;1;1;1;1	1;1;1;1;1	1;1;1;1;1	Vacuolar protein sorting-associated protein 37A	VPS37A	tr|E5RJ10|E5RJ10_HUMAN Vacuolar protein sorting-associated protein 37A OS=Homo sapiens OX=9606 GN=VPS37A PE=1 SV=1;tr|E5RHB8|E5RHB8_HUMAN Vacuolar protein sorting-associated protein 37A OS=Homo sapiens OX=9606 GN=VPS37A PE=1 SV=1;tr|E5RJX6|E5RJX6_HUMAN Vac	5	1	1	1	0	0	0	0	0	0	0	0	0	0	0	0	0	0	1	0	0	0	0	0	0	0	0	0	0	0	0	0	0	0	0	0	0	0	0	1	0	0
E5RJ41;E5RIB1;G3XAM7;P35221	E5RJ41;E5RIB1;G3XAM7;P35221	1;1;1;1	1;1;1;1	1;1;1;1	Catenin alpha-1	CTNNA1	tr|E5RJ41|E5RJ41_HUMAN Catenin alpha-1 (Fragment) OS=Homo sapiens OX=9606 GN=CTNNA1 PE=1 SV=1;tr|E5RIB1|E5RIB1_HUMAN Catenin alpha-1 (Fragment) OS=Homo sapiens OX=9606 GN=CTNNA1 PE=1 SV=1;tr|G3XAM7|G3XAM7_HUMAN Catenin (Cadherin-associated protein), alpha	4	1	1	1	0	0	0	1	0	0	0	0	0	0	0	0	0	0	0	0	0	0	0	0	0	0	0	0	1	0	0	0	0	0	0	0	0	0	0	0	0	0
E7EMC6;E5RK69;P08133;E5RFF0;H0YC77;E5RIU8;E5RJR0;E5RJF5;E5RI05;E5RK63	E7EMC6;E5RK69;P08133	5;5;5;2;1;1;1;1;1;1	5;5;5;2;1;1;1;1;1;1	5;5;5;2;1;1;1;1;1;1	Annexin;Annexin A6	ANXA6	tr|E7EMC6|E7EMC6_HUMAN Annexin OS=Homo sapiens OX=9606 GN=ANXA6 PE=1 SV=1;tr|E5RK69|E5RK69_HUMAN Annexin OS=Homo sapiens OX=9606 GN=ANXA6 PE=1 SV=1;sp|P08133|ANXA6_HUMAN Annexin A6 OS=Homo sapiens OX=9606 GN=ANXA6 PE=1 SV=3	10	5	5	5	3	2	0	0	0	0	1	0	0	0	0	0	0	0	0	0	0	0	0	0	0	3	2	0	0	0	0	1	0	0	0	0	0	0	0	0	0	0
E7EPB3;P50914	E7EPB3;P50914	3;3	3;3	3;3	60S ribosomal protein L14	RPL14	tr|E7EPB3|E7EPB3_HUMAN 60S ribosomal protein L14 OS=Homo sapiens OX=9606 GN=RPL14 PE=1 SV=1;sp|P50914|RL14_HUMAN 60S ribosomal protein L14 OS=Homo sapiens OX=9606 GN=RPL14 PE=1 SV=4	2	3	3	3	0	1	0	0	1	0	0	0	0	1	1	3	0	0	0	0	0	0	0	0	0	0	1	0	0	1	0	0	0	0	1	1	3	0	0	0	0	0
E7EQR4;P15311	E7EQR4;P15311	8;8	4;4	4;4	Ezrin	EZR	tr|E7EQR4|E7EQR4_HUMAN Ezrin OS=Homo sapiens OX=9606 GN=EZR PE=1 SV=3;sp|P15311|EZRI_HUMAN Ezrin OS=Homo sapiens OX=9606 GN=EZR PE=1 SV=4	2	8	4	4	3	6	2	1	2	1	0	0	0	1	2	2	1	2	2	2	2	1	2	1	1	2	4	1	0	1	0	0	0	0	0	0	0	0	0	0	0	0
E7EX53;A0A2R8Y738;A0A2R8YEM3;E7EQV9;P61313;E7ENU7	E7EX53;A0A2R8Y738;A0A2R8YEM3;E7EQV9;P61313;E7ENU7	2;2;2;2;2;1	2;2;2;2;2;1	2;2;2;2;2;1	Ribosomal protein L15;60S ribosomal protein L15	RPL15	tr|E7EX53|E7EX53_HUMAN Ribosomal protein L15 (Fragment) OS=Homo sapiens OX=9606 GN=RPL15 PE=1 SV=1;tr|A0A2R8Y738|A0A2R8Y738_HUMAN Ribosomal protein L15 (Fragment) OS=Homo sapiens OX=9606 GN=RPL15 PE=1 SV=1;tr|A0A2R8YEM3|A0A2R8YEM3_HUMAN Ribosomal protein L	6	2	2	2	0	0	0	0	0	0	0	1	0	1	0	1	0	0	0	0	0	0	0	0	0	0	0	0	0	0	0	0	1	0	1	0	1	0	0	0	0	0
E9PC69;Q7KZI7;E7ETY4;B4DIB3;A0A087X0I6;Q9P0L2;F5H4F6;P27448;F5H6N2;H0YNV4;J3KNR0;K7EK17;K7EKG8;F5H4J8;H0YKJ3;H0YIY6;Q96L34	E9PC69;Q7KZI7;E7ETY4	21;19;16;4;4;4;3;3;2;2;2;1;1;1;1;1;1	21;19;16;4;4;4;3;3;2;2;2;1;1;1;1;1;1	21;19;16;4;4;4;3;3;2;2;2;1;1;1;1;1;1	Serine/threonine-protein kinase MARK2	MARK2	tr|E9PC69|E9PC69_HUMAN Non-specific serine/threonine protein kinase OS=Homo sapiens OX=9606 GN=MARK2 PE=1 SV=3;sp|Q7KZI7|MARK2_HUMAN Serine/threonine-protein kinase MARK2 OS=Homo sapiens OX=9606 GN=MARK2 PE=1 SV=2;tr|E7ETY4|E7ETY4_HUMAN Non-specific serine	17	21	21	21	2	3	2	2	2	0	0	0	0	0	0	0	8	17	14	10	10	6	7	8	4	2	3	2	2	2	0	0	0	0	0	0	0	8	17	14	10	10
E9PEZ5;A0A1B0GUL6;Q9UPP5	E9PEZ5;A0A1B0GUL6;Q9UPP5	2;2;1	2;2;1	2;2;1	Uncharacterized protein KIAA1107	KIAA1107	tr|E9PEZ5|E9PEZ5_HUMAN BTB/POZ domain-containing protein 8 OS=Homo sapiens OX=9606 GN=BTBD8 PE=1 SV=2;tr|A0A1B0GUL6|A0A1B0GUL6_HUMAN BTB/POZ domain-containing protein 8 OS=Homo sapiens OX=9606 GN=BTBD8 PE=1 SV=1;sp|Q9UPP5|K1107_HUMAN AP2-interacting clathr	3	2	2	2	0	0	0	0	0	0	0	0	0	0	0	0	0	0	1	0	0	0	1	0	0	0	0	0	0	0	0	0	0	0	0	0	0	0	0	1	0	0
E9PII3;E9PK52;E9PHY5;O43491;E9PJP4;E9PQN0;E9PRG1;E9PIG0;E9PQD2;A0A2R8Y5B3	E9PII3;E9PK52;E9PHY5;O43491;E9PJP4;E9PQN0;E9PRG1;E9PIG0;E9PQD2;A0A2R8Y5B3	2;2;2;2;1;1;1;1;1;1	2;2;2;2;1;1;1;1;1;1	2;2;2;2;1;1;1;1;1;1	Band 4.1-like protein 2	EPB41L2	tr|E9PII3|E9PII3_HUMAN Band 4.1-like protein 2 OS=Homo sapiens OX=9606 GN=EPB41L2 PE=1 SV=1;tr|E9PK52|E9PK52_HUMAN Band 4.1-like protein 2 OS=Homo sapiens OX=9606 GN=EPB41L2 PE=1 SV=1;tr|E9PHY5|E9PHY5_HUMAN Band 4.1-like protein 2 OS=Homo sapiens OX=9606 G	10	2	2	2	2	0	0	0	0	0	0	0	0	0	0	0	0	0	0	0	0	0	0	0	0	2	0	0	0	0	0	0	0	0	0	0	0	0	0	0	0	0
E9PJD9;E9PLL6;E9PLX7;P46776	E9PJD9;E9PLL6;E9PLX7;P46776	1;1;1;1	1;1;1;1	1;1;1;1	60S ribosomal protein L27a	RPL27A	tr|E9PJD9|E9PJD9_HUMAN 60S ribosomal protein L27a OS=Homo sapiens OX=9606 GN=RPL27A PE=1 SV=1;tr|E9PLL6|E9PLL6_HUMAN 60S ribosomal protein L27a OS=Homo sapiens OX=9606 GN=RPL27A PE=1 SV=1;tr|E9PLX7|E9PLX7_HUMAN 60S ribosomal protein L27a OS=Homo sapiens OX	4	1	1	1	0	0	0	0	0	0	0	0	0	1	0	1	0	0	0	0	0	0	0	0	0	0	0	0	0	0	0	0	0	0	1	0	1	0	0	0	0	0
E9PJK1;E9PRJ8;H0YDL9;H0YDJ9;E9PIF1;A6NMH8;P60033;E9PM31;H0YEE2	E9PJK1;E9PRJ8;H0YDL9;H0YDJ9;E9PIF1;A6NMH8;P60033	5;5;5;5;5;5;5;2;2	5;5;5;5;5;5;5;2;2	5;5;5;5;5;5;5;2;2	Tetraspanin;CD81 antigen	CD81	tr|E9PJK1|E9PJK1_HUMAN Tetraspanin OS=Homo sapiens OX=9606 GN=CD81 PE=1 SV=1;tr|E9PRJ8|E9PRJ8_HUMAN Tetraspanin (Fragment) OS=Homo sapiens OX=9606 GN=CD81 PE=1 SV=1;tr|H0YDL9|H0YDL9_HUMAN Tetraspanin (Fragment) OS=Homo sapiens OX=9606 GN=CD81 PE=1 SV=1;tr|	9	5	5	5	4	3	3	1	3	2	2	0	0	1	0	1	4	4	4	4	3	4	3	4	3	4	3	3	1	3	2	2	0	0	1	0	1	4	4	4	4	3
E9PKZ0;P62917;E9PP36;G3V1A1;E9PKU4	E9PKZ0;P62917;E9PP36;G3V1A1;E9PKU4	2;2;1;1;1	2;2;1;1;1	2;2;1;1;1	60S ribosomal protein L8	RPL8	tr|E9PKZ0|E9PKZ0_HUMAN 60S ribosomal protein L8 (Fragment) OS=Homo sapiens OX=9606 GN=RPL8 PE=1 SV=1;sp|P62917|RL8_HUMAN 60S ribosomal protein L8 OS=Homo sapiens OX=9606 GN=RPL8 PE=1 SV=2;tr|E9PP36|E9PP36_HUMAN 60S ribosomal protein L8 OS=Homo sapiens OX=9	5	2	2	2	0	0	0	0	0	0	0	0	0	1	1	2	0	0	0	0	0	0	0	0	0	0	0	0	0	0	0	0	0	0	1	1	2	0	0	0	0	0
E9PLD0;E7END7;Q9H0U4;Q92928;P62820;A0A2R8YDI9;H0YLJ8;H0YL94;G3V196;A0A2R8YFB8;P59190	E9PLD0;E7END7;Q9H0U4;Q92928;P62820	3;3;3;3;3;1;1;1;1;1;1	2;2;2;2;2;0;0;0;0;0;0	2;2;2;2;2;0;0;0;0;0;0	Ras-related protein Rab-1B;Putative Ras-related protein Rab-1C;Ras-related protein Rab-1A	RAB1B;RAB1A;RAB1C	tr|E9PLD0|E9PLD0_HUMAN Ras-related protein Rab-1B OS=Homo sapiens OX=9606 GN=RAB1B PE=1 SV=1;tr|E7END7|E7END7_HUMAN Ras-related protein Rab-1A OS=Homo sapiens OX=9606 GN=RAB1A PE=1 SV=1;sp|Q9H0U4|RAB1B_HUMAN Ras-related protein Rab-1B OS=Homo sapiens OX=96	11	3	2	2	2	2	0	1	1	0	1	0	0	1	0	1	2	3	3	3	3	2	1	2	1	1	1	0	0	0	0	0	0	0	0	0	0	1	2	2	2	2
E9PN89	E9PN89	27	1	1		HSPA8	tr|E9PN89|E9PN89_HUMAN Heat shock cognate 71 kDa protein (Fragment) OS=Homo sapiens OX=9606 GN=HSPA8 PE=1 SV=1	1	27	1	1	16	20	16	15	16	12	12	0	1	6	6	11	14	15	16	15	16	16	14	13	12	0	1	0	1	1	0	0	0	0	0	0	0	0	0	0	0	0
E9PNW4;A0A2U3TZL5;P13987;H0YET2	E9PNW4;A0A2U3TZL5;P13987;H0YET2	3;3;3;2	3;3;3;2	3;3;3;2	CD59 glycoprotein	CD59	tr|E9PNW4|E9PNW4_HUMAN CD59 glycoprotein OS=Homo sapiens OX=9606 PE=1 SV=1;tr|A0A2U3TZL5|A0A2U3TZL5_HUMAN CD59 glycoprotein (Fragment) OS=Homo sapiens OX=9606 GN=CD59 PE=1 SV=1;sp|P13987|CD59_HUMAN CD59 glycoprotein OS=Homo sapiens OX=9606 GN=CD59 PE=1 SV=	4	3	3	3	1	1	0	2	2	0	0	0	0	0	0	0	2	2	2	2	2	1	2	2	1	1	1	0	2	2	0	0	0	0	0	0	0	2	2	2	2	2
E9PP50;P23528;G3V1A4;E9PK25;E9PS23;E9PQB7;E9PLJ3;Q9Y281	E9PP50;P23528;G3V1A4;E9PK25;E9PS23;E9PQB7	6;6;4;4;3;3;2;2	6;6;4;4;3;3;2;2	6;6;4;4;3;3;2;2	Cofilin-1	CFL1	tr|E9PP50|E9PP50_HUMAN Cofilin, non-muscle isoform (Fragment) OS=Homo sapiens OX=9606 GN=CFL1 PE=1 SV=8;sp|P23528|COF1_HUMAN Cofilin-1 OS=Homo sapiens OX=9606 GN=CFL1 PE=1 SV=3;tr|G3V1A4|G3V1A4_HUMAN Cofilin, non-muscle isoform OS=Homo sapiens OX=9606 GN=C	8	6	6	6	2	4	1	2	1	2	1	0	0	2	2	1	3	5	2	2	2	2	2	0	2	2	4	1	2	1	2	1	0	0	2	2	1	3	5	2	2	2
E9PPJ0;Q13435	E9PPJ0;Q13435	1;1	1;1	1;1	Splicing factor 3B subunit 2	SF3B2	tr|E9PPJ0|E9PPJ0_HUMAN Splicing factor 3B subunit 2 OS=Homo sapiens OX=9606 GN=SF3B2 PE=1 SV=1;sp|Q13435|SF3B2_HUMAN Splicing factor 3B subunit 2 OS=Homo sapiens OX=9606 GN=SF3B2 PE=1 SV=2	2	1	1	1	0	1	0	0	0	0	0	0	0	0	0	0	0	0	0	0	0	0	0	0	0	0	1	0	0	0	0	0	0	0	0	0	0	0	0	0	0	0
E9PRJ3;K4DIA7;E9PMR4;P48509	E9PRJ3;K4DIA7;E9PMR4;P48509	1;1;1;1	1;1;1;1	1;1;1;1	Tetraspanin;CD151 antigen	CD151	tr|E9PRJ3|E9PRJ3_HUMAN Tetraspanin (Fragment) OS=Homo sapiens OX=9606 GN=CD151 PE=1 SV=1;tr|K4DIA7|K4DIA7_HUMAN Tetraspanin (Fragment) OS=Homo sapiens OX=9606 GN=CD151 PE=1 SV=1;tr|E9PMR4|E9PMR4_HUMAN Tetraspanin OS=Homo sapiens OX=9606 GN=CD151 PE=1 SV=1;	4	1	1	1	0	0	0	0	0	0	0	0	0	0	0	0	1	1	1	0	0	0	0	1	0	0	0	0	0	0	0	0	0	0	0	0	0	1	1	1	0	0
F5GZ56;Q9UG01	F5GZ56;Q9UG01	1;1	1;1	1;1	Intraflagellar transport protein 172 homolog	IFT172	tr|F5GZ56|F5GZ56_HUMAN Intraflagellar transport protein 172 homolog OS=Homo sapiens OX=9606 GN=IFT172 PE=1 SV=1;sp|Q9UG01|IF172_HUMAN Intraflagellar transport protein 172 homolog OS=Homo sapiens OX=9606 GN=IFT172 PE=1 SV=2	2	1	1	1	0	1	0	0	1	1	0	0	0	0	0	0	0	0	0	0	0	0	0	1	0	0	1	0	0	1	1	0	0	0	0	0	0	0	0	0	0	0
F5GZS6;J3KPF3;P08195;F5H0E2;H0YFS2;F5H867;F5GZI0;F5GZR9;H0YFX4	F5GZS6;J3KPF3;P08195	17;17;17;6;6;4;4;2;2	17;17;17;6;6;4;4;2;2	17;17;17;6;6;4;4;2;2	4F2 cell-surface antigen heavy chain	SLC3A2	tr|F5GZS6|F5GZS6_HUMAN 4F2 cell-surface antigen heavy chain OS=Homo sapiens OX=9606 GN=SLC3A2 PE=1 SV=1;tr|J3KPF3|J3KPF3_HUMAN 4F2 cell-surface antigen heavy chain OS=Homo sapiens OX=9606 GN=SLC3A2 PE=1 SV=1;sp|P08195|4F2_HUMAN 4F2 cell-surface antigen hea	9	17	17	17	6	8	2	2	4	3	1	0	0	1	1	5	7	8	11	9	9	5	7	7	4	6	8	2	2	4	3	1	0	0	1	1	5	7	8	11	9	9
F5H157;Q15286	F5H157;Q15286	3;3	3;3	3;3	Ras-related protein Rab-35	RAB35	tr|F5H157|F5H157_HUMAN Ras-related protein Rab-35 (Fragment) OS=Homo sapiens OX=9606 GN=RAB35 PE=1 SV=1;sp|Q15286|RAB35_HUMAN Ras-related protein Rab-35 OS=Homo sapiens OX=9606 GN=RAB35 PE=1 SV=1	2	3	3	3	1	0	1	0	0	0	1	0	0	0	0	0	1	1	2	1	1	1	1	1	0	1	0	1	0	0	0	1	0	0	0	0	0	1	1	2	1	1
F5H4Q5;A5D8V6	F5H4Q5;A5D8V6	2;2	2;2	2;2	Vacuolar protein sorting-associated protein 37C	VPS37C	tr|F5H4Q5|F5H4Q5_HUMAN Vacuolar protein sorting-associated protein 37C (Fragment) OS=Homo sapiens OX=9606 GN=VPS37C PE=1 SV=1;sp|A5D8V6|VP37C_HUMAN Vacuolar protein sorting-associated protein 37C OS=Homo sapiens OX=9606 GN=VPS37C PE=1 SV=2	2	2	2	2	1	2	1	1	0	0	1	0	0	0	0	0	1	1	0	1	1	1	1	1	1	1	2	1	1	0	0	1	0	0	0	0	0	1	1	0	1	1
F5H6E2;O00159;I3L501;I3L3Y6;I3L3F5	F5H6E2;O00159;I3L501;I3L3Y6	3;3;2;2;1	3;3;2;2;1	3;3;2;2;1	Unconventional myosin-Ic	MYO1C	tr|F5H6E2|F5H6E2_HUMAN Unconventional myosin-Ic OS=Homo sapiens OX=9606 GN=MYO1C PE=1 SV=1;sp|O00159|MYO1C_HUMAN Unconventional myosin-Ic OS=Homo sapiens OX=9606 GN=MYO1C PE=1 SV=4;tr|I3L501|I3L501_HUMAN Unconventional myosin-Ic (Fragment) OS=Homo sapiens	5	3	3	3	2	0	0	0	1	2	0	0	0	0	0	0	0	0	0	0	0	0	0	0	0	2	0	0	0	1	2	0	0	0	0	0	0	0	0	0	0	0
F6RFD5;P60981	F6RFD5;P60981	2;2	2;2	2;2	Destrin	DSTN	tr|F6RFD5|F6RFD5_HUMAN Actin-depolymerizing factor OS=Homo sapiens OX=9606 GN=DSTN PE=1 SV=1;sp|P60981|DEST_HUMAN Destrin OS=Homo sapiens OX=9606 GN=DSTN PE=1 SV=3	2	2	2	2	0	0	0	1	0	0	0	0	0	0	0	0	0	0	2	0	1	0	0	0	0	0	0	0	1	0	0	0	0	0	0	0	0	0	0	2	0	1
F6U4U2;P51955	F6U4U2;P51955	2;2	2;2	2;2	Serine/threonine-protein kinase Nek2	NEK2	tr|F6U4U2|F6U4U2_HUMAN Serine/threonine-protein kinase Nek2 OS=Homo sapiens OX=9606 GN=NEK2 PE=1 SV=1;sp|P51955|NEK2_HUMAN Serine/threonine-protein kinase Nek2 OS=Homo sapiens OX=9606 GN=NEK2 PE=1 SV=1	2	2	2	2	0	0	0	0	0	0	0	0	0	0	0	0	0	1	0	0	0	0	1	0	0	0	0	0	0	0	0	0	0	0	0	0	0	0	1	0	0	0
F6UXX1;B7Z645;O60506	F6UXX1;B7Z645;O60506	1;1;1	1;1;1	1;1;1	Heterogeneous nuclear ribonucleoprotein Q	SYNCRIP	tr|F6UXX1|F6UXX1_HUMAN Heterogeneous nuclear ribonucleoprotein Q (Fragment) OS=Homo sapiens OX=9606 GN=SYNCRIP PE=1 SV=1;tr|B7Z645|B7Z645_HUMAN Heterogeneous nuclear ribonucleoprotein Q OS=Homo sapiens OX=9606 GN=SYNCRIP PE=1 SV=1;sp|O60506|HNRPQ_HUMAN Het	3	1	1	1	1	1	0	0	0	0	0	0	0	0	0	0	0	0	0	0	0	0	0	0	0	1	1	0	0	0	0	0	0	0	0	0	0	0	0	0	0	0
F8VNT9;F8VV56;F8W022;F8VWK8;P08962	F8VNT9;F8VV56;F8W022;F8VWK8;P08962	2;2;2;2;2	2;2;2;2;2	2;2;2;2;2	Tetraspanin;CD63 antigen	CD63	tr|F8VNT9|F8VNT9_HUMAN CD63 antigen (Fragment) OS=Homo sapiens OX=9606 GN=CD63 PE=1 SV=1;tr|F8VV56|F8VV56_HUMAN CD63 antigen OS=Homo sapiens OX=9606 GN=CD63 PE=1 SV=1;tr|F8W022|F8W022_HUMAN Tetraspanin (Fragment) OS=Homo sapiens OX=9606 GN=CD63 PE=1 SV=1;t	5	2	2	2	0	0	0	0	0	0	0	0	0	0	0	1	2	2	2	1	1	2	1	0	1	0	0	0	0	0	0	0	0	0	0	0	1	2	2	2	1	1
F8VUA2;F8VVT7;Q9HD42	F8VUA2;F8VVT7;Q9HD42	3;3;3	3;3;3	3;3;3	Charged multivesicular body protein 1a	CHMP1A	tr|F8VUA2|F8VUA2_HUMAN Charged multivesicular body protein 1a OS=Homo sapiens OX=9606 GN=CHMP1A PE=1 SV=1;tr|F8VVT7|F8VVT7_HUMAN Charged multivesicular body protein 1a OS=Homo sapiens OX=9606 GN=CHMP1A PE=1 SV=1;sp|Q9HD42|CHM1A_HUMAN Charged multivesicular	3	3	3	3	1	1	0	0	1	1	0	0	0	0	0	0	2	1	1	2	2	1	1	1	0	1	1	0	0	1	1	0	0	0	0	0	0	2	1	1	2	2
F8VUA6;G3V203;H0YHA7;J3QQ67;Q07020;F8VYV2;A0A075B7A0	F8VUA6;G3V203;H0YHA7;J3QQ67;Q07020	3;3;3;3;3;1;1	3;3;3;3;3;1;1	3;3;3;3;3;1;1	60S ribosomal protein L18	RPL18	tr|F8VUA6|F8VUA6_HUMAN 60S ribosomal protein L18 (Fragment) OS=Homo sapiens OX=9606 GN=RPL18 PE=1 SV=1;tr|G3V203|G3V203_HUMAN 60S ribosomal protein L18 OS=Homo sapiens OX=9606 GN=RPL18 PE=1 SV=1;tr|H0YHA7|H0YHA7_HUMAN 60S ribosomal protein L18 (Fragment) O	7	3	3	3	2	1	0	0	0	0	1	0	0	0	0	3	0	0	0	0	0	0	0	0	0	2	1	0	0	0	0	1	0	0	0	0	3	0	0	0	0	0
F8VWS0;P05388;F8W1K8;F8VS58;F8VQY6;F8VRK7;G3V210;F8VZS0;F8VU65;Q8NHW5	F8VWS0;P05388;F8W1K8;F8VS58;F8VQY6;F8VRK7;G3V210;F8VZS0;F8VU65;Q8NHW5	2;2;1;1;1;1;1;1;1;1	2;2;1;1;1;1;1;1;1;1	2;2;1;1;1;1;1;1;1;1	60S acidic ribosomal protein P0;60S acidic ribosomal protein P0-like	RPLP0;RPLP0P6	tr|F8VWS0|F8VWS0_HUMAN 60S acidic ribosomal protein P0 OS=Homo sapiens OX=9606 GN=RPLP0 PE=1 SV=1;sp|P05388|RLA0_HUMAN 60S acidic ribosomal protein P0 OS=Homo sapiens OX=9606 GN=RPLP0 PE=1 SV=1;tr|F8W1K8|F8W1K8_HUMAN 60S acidic ribosomal protein P0 OS=Homo	10	2	2	2	0	0	0	0	0	0	0	0	0	0	0	2	0	0	0	0	0	0	0	0	0	0	0	0	0	0	0	0	0	0	0	0	2	0	0	0	0	0
F8VWW8;Q92485;Q5T0Y8	F8VWW8;Q92485;Q5T0Y8	2;2;1	2;2;1	2;2;1	Acid sphingomyelinase-like phosphodiesterase 3b	SMPDL3B	tr|F8VWW8|F8VWW8_HUMAN Acid sphingomyelinase-like phosphodiesterase 3b OS=Homo sapiens OX=9606 GN=SMPDL3B PE=1 SV=1;sp|Q92485|ASM3B_HUMAN Acid sphingomyelinase-like phosphodiesterase 3b OS=Homo sapiens OX=9606 GN=SMPDL3B PE=1 SV=2;tr|Q5T0Y8|Q5T0Y8_HUMAN Ac	3	2	2	2	0	0	0	0	0	0	0	0	0	0	0	0	0	1	2	0	0	0	0	0	0	0	0	0	0	0	0	0	0	0	0	0	0	0	1	2	0	0
F8VXH9;H3BRU6;F8VZX2;Q15366;F8W0G4;F8W1G6;J3QT27;E9PFP8;P57721;H3BND9;F8VTZ0;F8VRH0	F8VXH9;H3BRU6;F8VZX2;Q15366;F8W0G4;F8W1G6;J3QT27;E9PFP8;P57721	6;6;6;6;5;4;3;3;3;2;1;1	6;6;6;6;5;4;3;3;3;2;1;1	4;4;4;4;3;3;1;1;1;2;0;1	Poly(rC)-binding protein 2;Poly(rC)-binding protein 3	PCBP2;PCBP3	tr|F8VXH9|F8VXH9_HUMAN Poly(rC)-binding protein 2 (Fragment) OS=Homo sapiens OX=9606 GN=PCBP2 PE=1 SV=1;tr|H3BRU6|H3BRU6_HUMAN Poly(rC)-binding protein 2 (Fragment) OS=Homo sapiens OX=9606 GN=PCBP2 PE=1 SV=1;tr|F8VZX2|F8VZX2_HUMAN Poly(rC)-binding protein	12	6	6	4	4	3	2	2	2	1	1	0	0	0	0	0	5	4	4	3	3	3	3	2	3	4	3	2	2	2	1	1	0	0	0	0	0	5	4	4	3	3
F8W7C6;A0A087WV22;X1WI28;P27635	F8W7C6;A0A087WV22;X1WI28;P27635	2;2;2;2	2;2;2;2	2;2;2;2	60S ribosomal protein L10	RPL10	tr|F8W7C6|F8W7C6_HUMAN 60S ribosomal protein L10 OS=Homo sapiens OX=9606 GN=RPL10 PE=1 SV=2;tr|A0A087WV22|A0A087WV22_HUMAN 60S ribosomal protein L10 OS=Homo sapiens OX=9606 GN=RPL10 PE=1 SV=1;tr|X1WI28|X1WI28_HUMAN 60S ribosomal protein L10 (Fragment) OS=H	4	2	2	2	0	0	0	0	0	0	1	0	0	0	0	1	0	0	0	0	0	0	0	0	0	0	0	0	0	0	0	1	0	0	0	0	1	0	0	0	0	0
F8WD59;C9J9K3;A0A0C4DG17;P08865	F8WD59;C9J9K3;A0A0C4DG17;P08865	2;2;2;2	2;2;2;2	2;2;2;2	40S ribosomal protein SA	RPSA	tr|F8WD59|F8WD59_HUMAN 40S ribosomal protein SA (Fragment) OS=Homo sapiens OX=9606 GN=RPSA PE=1 SV=2;tr|C9J9K3|C9J9K3_HUMAN 40S ribosomal protein SA (Fragment) OS=Homo sapiens OX=9606 GN=RPSA PE=1 SV=8;tr|A0A0C4DG17|A0A0C4DG17_HUMAN 40S ribosomal protein S	4	2	2	2	0	0	0	0	0	0	0	0	0	0	0	2	0	0	0	0	0	0	0	0	0	0	0	0	0	0	0	0	0	0	0	0	2	0	0	0	0	0
F8WE04;P04792	F8WE04;P04792	2;2	2;2	2;2	Heat shock protein beta-1	HSPB1	tr|F8WE04|F8WE04_HUMAN Heat shock protein beta-1 OS=Homo sapiens OX=9606 GN=HSPB1 PE=1 SV=1;sp|P04792|HSPB1_HUMAN Heat shock protein beta-1 OS=Homo sapiens OX=9606 GN=HSPB1 PE=1 SV=2	2	2	2	2	1	0	0	0	0	0	0	0	0	0	0	0	0	0	1	2	0	1	0	0	0	1	0	0	0	0	0	0	0	0	0	0	0	0	0	1	2	0
F8WEW2;F8WE84;P61158	F8WEW2;F8WE84;P61158	1;1;1	1;1;1	1;1;1	Actin-related protein 3	ACTR3	tr|F8WEW2|F8WEW2_HUMAN Actin-related protein 3 OS=Homo sapiens OX=9606 GN=ACTR3 PE=1 SV=1;tr|F8WE84|F8WE84_HUMAN Actin-related protein 3 OS=Homo sapiens OX=9606 GN=ACTR3 PE=1 SV=1;sp|P61158|ARP3_HUMAN Actin-related protein 3 OS=Homo sapiens OX=9606 GN=ACTR	3	1	1	1	1	1	0	0	0	0	0	0	0	0	0	0	0	0	0	0	0	0	0	0	0	1	1	0	0	0	0	0	0	0	0	0	0	0	0	0	0	0
G3V1N2	G3V1N2	6	3	1		HBA2	tr|G3V1N2|G3V1N2_HUMAN HCG1745306, isoform CRA_a OS=Homo sapiens OX=9606 GN=HBA2 PE=1 SV=1	1	6	3	1	2	0	2	1	2	1	4	3	4	1	1	2	2	2	2	2	1	2	2	2	2	0	0	0	0	0	0	1	2	2	0	0	0	0	0	0	0	0
G3V274;Q9UL15	G3V274;Q9UL15	1;1	1;1	1;1	BAG family molecular chaperone regulator 5	BAG5	tr|G3V274|G3V274_HUMAN BAG family molecular chaperone regulator 5 (Fragment) OS=Homo sapiens OX=9606 GN=BAG5 PE=1 SV=1;sp|Q9UL15|BAG5_HUMAN BAG family molecular chaperone regulator 5 OS=Homo sapiens OX=9606 GN=BAG5 PE=1 SV=1	2	1	1	1	1	0	0	0	0	0	0	0	0	0	0	0	0	0	0	0	0	0	0	0	0	1	0	0	0	0	0	0	0	0	0	0	0	0	0	0	0	0
G3V3J0;Q96AC1;A0A0U1RRM8;H0YJ34	G3V3J0;Q96AC1;A0A0U1RRM8;H0YJ34	2;2;1;1	2;2;1;1	2;2;1;1	Fermitin family homolog 2	FERMT2	tr|G3V3J0|G3V3J0_HUMAN Fermitin family homolog 2 (Fragment) OS=Homo sapiens OX=9606 GN=FERMT2 PE=1 SV=1;sp|Q96AC1|FERM2_HUMAN Fermitin family homolog 2 OS=Homo sapiens OX=9606 GN=FERMT2 PE=1 SV=1;tr|A0A0U1RRM8|A0A0U1RRM8_HUMAN Fermitin family homolog 2 (Fr	4	2	2	2	1	1	0	0	1	0	0	0	0	0	0	0	0	0	0	0	0	0	0	0	0	1	1	0	0	1	0	0	0	0	0	0	0	0	0	0	0	0
G5EA09	G5EA09	14	1	1		SDCBP	tr|G5EA09|G5EA09_HUMAN Syndecan binding protein (Syntenin), isoform CRA_a OS=Homo sapiens OX=9606 GN=SDCBP PE=1 SV=1	1	14	1	1	5	6	2	3	2	1	3	1	0	2	1	3	6	6	7	4	5	4	5	5	5	0	0	0	0	0	0	0	0	0	0	0	1	0	0	0	0	0
H0Y380;H0Y4H1;H0Y7Z9;H0Y6Z7;P10586;Q3KPI9;G8JL96;F5GWR7;P23468;Q13332	H0Y380;H0Y4H1;H0Y7Z9;H0Y6Z7;P10586;Q3KPI9;G8JL96;F5GWR7;P23468;Q13332	2;2;2;2;2;1;1;1;1;1	2;2;2;2;2;1;1;1;1;1	2;2;2;2;2;1;1;1;1;1	Receptor-type tyrosine-protein phosphatase F;Protein-tyrosine-phosphatase;Receptor-type tyrosine-protein phosphatase delta;Receptor-type tyrosine-protein phosphatase S	PTPRF;PTPRD;PTPRS	tr|H0Y380|H0Y380_HUMAN Protein-tyrosine-phosphatase (Fragment) OS=Homo sapiens OX=9606 GN=PTPRF PE=1 SV=1;tr|H0Y4H1|H0Y4H1_HUMAN Protein-tyrosine-phosphatase (Fragment) OS=Homo sapiens OX=9606 GN=PTPRF PE=1 SV=1;tr|H0Y7Z9|H0Y7Z9_HUMAN Protein-tyrosine-phos	10	2	2	2	0	1	0	0	1	0	0	0	0	0	0	0	0	1	0	0	0	0	0	0	0	0	1	0	0	1	0	0	0	0	0	0	0	0	1	0	0	0
H0Y449;P67809	H0Y449;P67809	1;1	1;1	1;1	Nuclease-sensitive element-binding protein 1	YBX1	tr|H0Y449|H0Y449_HUMAN Y-box-binding protein 1 (Fragment) OS=Homo sapiens OX=9606 GN=YBX1 PE=1 SV=1;sp|P67809|YBOX1_HUMAN Y-box-binding protein 1 OS=Homo sapiens OX=9606 GN=YBX1 PE=1 SV=3	2	1	1	1	0	1	0	0	0	0	0	0	0	0	0	0	0	0	0	0	0	0	0	0	0	0	1	0	0	0	0	0	0	0	0	0	0	0	0	0	0	0
H0Y579;P54727	H0Y579;P54727	1;1	1;1	1;1	UV excision repair protein RAD23 homolog B	RAD23B	tr|H0Y579|H0Y579_HUMAN UV excision repair protein RAD23 homolog B (Fragment) OS=Homo sapiens OX=9606 GN=RAD23B PE=1 SV=1;sp|P54727|RD23B_HUMAN UV excision repair protein RAD23 homolog B OS=Homo sapiens OX=9606 GN=RAD23B PE=1 SV=1	2	1	1	1	0	0	0	0	0	0	0	0	0	0	0	0	0	1	1	1	0	0	0	0	0	0	0	0	0	0	0	0	0	0	0	0	0	0	1	1	1	0
H0YA55;A0A0C4DGB6;CON__P02768-1;P02768;D6RHD5;B7WNR0;C9JKR2;A0A087WWT3;H7C013	H0YA55;A0A0C4DGB6;CON__P02768-1;P02768;D6RHD5;B7WNR0;C9JKR2	10;10;10;10;9;9;7;4;2	5;5;5;5;5;5;3;1;1	5;5;5;5;5;5;3;1;1	Serum albumin	ALB	tr|H0YA55|H0YA55_HUMAN Albumin (Fragment) OS=Homo sapiens OX=9606 GN=ALB PE=1 SV=1;tr|A0A0C4DGB6|A0A0C4DGB6_HUMAN Albumin OS=Homo sapiens OX=9606 GN=ALB PE=1 SV=1;;sp|P02768|ALBU_HUMAN Albumin OS=Homo sapiens OX=9606 GN=ALB PE=1 SV=2;tr|D6RHD5|D6RHD5_HUMAN	9	10	5	5	4	2	3	3	4	0	5	2	2	2	2	5	2	4	2	3	2	2	1	2	2	1	0	0	1	1	0	1	0	1	0	0	1	0	1	0	0	0
H0YJ11;H0YJW3;H7C5W8;H7C144;F5GXS2;H9KV75;P12814;O43707	H0YJ11;H0YJW3;H7C5W8;H7C144;F5GXS2;H9KV75;P12814;O43707	1;1;1;1;1;1;1;1	1;1;1;1;1;1;1;1	1;1;1;1;1;1;1;1	Alpha-actinin-1;Alpha-actinin-4	ACTN1;ACTN4	tr|H0YJ11|H0YJ11_HUMAN Alpha-actinin-1 (Fragment) OS=Homo sapiens OX=9606 GN=ACTN1 PE=1 SV=1;tr|H0YJW3|H0YJW3_HUMAN Alpha-actinin-1 (Fragment) OS=Homo sapiens OX=9606 GN=ACTN1 PE=1 SV=1;tr|H7C5W8|H7C5W8_HUMAN Alpha-actinin-1 (Fragment) OS=Homo sapiens OX=9	8	1	1	1	0	1	0	0	0	0	0	0	0	0	0	0	0	0	0	0	0	0	0	0	0	0	1	0	0	0	0	0	0	0	0	0	0	0	0	0	0	0
H0YKJ9;O60637;H0YMH8	H0YKJ9;O60637;H0YMH8	2;2;1	2;2;1	2;2;1	Tetraspanin-3	TSPAN3	tr|H0YKJ9|H0YKJ9_HUMAN Tetraspanin-3 OS=Homo sapiens OX=9606 GN=TSPAN3 PE=1 SV=1;sp|O60637|TSN3_HUMAN Tetraspanin-3 OS=Homo sapiens OX=9606 GN=TSPAN3 PE=2 SV=1;tr|H0YMH8|H0YMH8_HUMAN Tetraspanin-3 OS=Homo sapiens OX=9606 GN=TSPAN3 PE=1 SV=1	3	2	2	2	0	1	0	1	0	0	0	1	0	0	0	0	0	1	0	0	0	0	0	0	0	0	1	0	1	0	0	0	1	0	0	0	0	0	1	0	0	0
H0YNE9;Q92930;H0YMN7;M0R257;P20337;O95716;P20336;Q96E17	H0YNE9;Q92930;H0YMN7	3;3;2;1;1;1;1;1	1;1;0;0;0;0;0;0	1;1;0;0;0;0;0;0	Ras-related protein Rab-8B	RAB8B	tr|H0YNE9|H0YNE9_HUMAN Ras-related protein Rab-8B (Fragment) OS=Homo sapiens OX=9606 GN=RAB8B PE=1 SV=1;sp|Q92930|RAB8B_HUMAN Ras-related protein Rab-8B OS=Homo sapiens OX=9606 GN=RAB8B PE=1 SV=2;tr|H0YMN7|H0YMN7_HUMAN Ras-related protein Rab-8B OS=Homo sa	8	3	1	1	1	1	0	1	1	0	1	0	0	1	0	1	1	3	1	1	1	1	1	1	1	0	0	0	0	0	0	0	0	0	0	0	0	0	1	0	0	0
H3BLV0;B1AP13;H7BY55;P08174;B1AP15;A0A2R8YDY3;A0A2R8YEC5	H3BLV0;B1AP13;H7BY55;P08174	5;5;5;5;2;1;1	5;5;5;5;2;1;1	5;5;5;5;2;1;1	Complement decay-accelerating factor	CD55	tr|H3BLV0|H3BLV0_HUMAN Complement decay-accelerating factor (Fragment) OS=Homo sapiens OX=9606 GN=CD55 PE=1 SV=1;tr|B1AP13|B1AP13_HUMAN Complement decay-accelerating factor OS=Homo sapiens OX=9606 GN=CD55 PE=1 SV=1;tr|H7BY55|H7BY55_HUMAN Complement decay-a	7	5	5	5	1	1	0	0	0	0	0	0	0	0	0	0	1	3	3	3	1	0	1	0	0	1	1	0	0	0	0	0	0	0	0	0	0	1	3	3	3	1
H3BMH2;H3BSC1;P62491;Q15907;B4DQU5	H3BMH2;H3BSC1;P62491;Q15907	5;5;5;5;2	5;5;5;5;2	5;5;5;5;2	Ras-related protein Rab-11A;Ras-related protein Rab-11B	RAB11A;RAB11B	tr|H3BMH2|H3BMH2_HUMAN Ras-related protein Rab-11A (Fragment) OS=Homo sapiens OX=9606 GN=RAB11A PE=4 SV=1;tr|H3BSC1|H3BSC1_HUMAN Ras-related protein Rab-11A OS=Homo sapiens OX=9606 GN=RAB11A PE=1 SV=1;sp|P62491|RB11A_HUMAN Ras-related protein Rab-11A OS=Ho	5	5	5	5	2	0	1	1	0	1	3	0	0	0	0	1	3	4	4	4	4	3	3	2	1	2	0	1	1	0	1	3	0	0	0	0	1	3	4	4	4	4
H3BMU1;H3BUI0;P53990;H3BQF7;J3KR23;F5GXM3;H3BPP6;H3BRE2	H3BMU1;H3BUI0;P53990;H3BQF7;J3KR23;F5GXM3	10;10;10;9;7;5;3;3	10;10;10;9;7;5;3;3	10;10;10;9;7;5;3;3	IST1 homolog	IST1	tr|H3BMU1|H3BMU1_HUMAN IST1 homolog (Fragment) OS=Homo sapiens OX=9606 GN=IST1 PE=1 SV=1;tr|H3BUI0|H3BUI0_HUMAN IST1 homolog (Fragment) OS=Homo sapiens OX=9606 GN=IST1 PE=1 SV=1;sp|P53990|IST1_HUMAN IST1 homolog OS=Homo sapiens OX=9606 GN=IST1 PE=1 SV=1;tr	8	10	10	10	6	7	2	2	3	0	2	0	0	0	0	1	2	2	2	1	2	1	2	1	1	6	7	2	2	3	0	2	0	0	0	0	1	2	2	2	1	2
H3BPR3;Q8WV41	H3BPR3;Q8WV41	1;1	1;1	1;1	Sorting nexin-33	SNX33	tr|H3BPR3|H3BPR3_HUMAN Sorting nexin-33 (Fragment) OS=Homo sapiens OX=9606 GN=SNX33 PE=1 SV=1;sp|Q8WV41|SNX33_HUMAN Sorting nexin-33 OS=Homo sapiens OX=9606 GN=SNX33 PE=1 SV=1	2	1	1	1	0	0	0	0	0	0	0	0	0	0	0	0	1	0	0	0	0	0	0	0	0	0	0	0	0	0	0	0	0	0	0	0	0	1	0	0	0	0
H3BSW0;A0A3B3ISV5;Q8N9N7	H3BSW0;A0A3B3ISV5;Q8N9N7	3;3;3	3;3;3	3;3;3	Leucine-rich repeat-containing protein 57	LRRC57	tr|H3BSW0|H3BSW0_HUMAN Leucine-rich repeat-containing protein 57 (Fragment) OS=Homo sapiens OX=9606 GN=LRRC57 PE=1 SV=1;tr|A0A3B3ISV5|A0A3B3ISV5_HUMAN Uncharacterized protein OS=Homo sapiens OX=9606 PE=4 SV=1;sp|Q8N9N7|LRC57_HUMAN Leucine-rich repeat-conta	3	3	3	3	0	1	0	0	0	0	0	0	0	0	0	0	1	1	0	1	1	0	0	1	0	0	1	0	0	0	0	0	0	0	0	0	0	1	1	0	1	1
H3BTL1;Q9GZQ8;A6NCE7;Q9H492	H3BTL1;Q9GZQ8;A6NCE7;Q9H492	2;2;2;1	2;2;2;1	2;2;2;1	Microtubule-associated proteins 1A/1B light chain 3B;Microtubule-associated proteins 1A/1B light chain 3 beta 2;Microtubule-associated proteins 1A/1B light chain 3A	MAP1LC3B;MAP1LC3B2;MAP1LC3A	tr|H3BTL1|H3BTL1_HUMAN Microtubule-associated protein 1 light chain 3 beta, isoform CRA_f OS=Homo sapiens OX=9606 GN=MAP1LC3B PE=3 SV=1;sp|Q9GZQ8|MLP3B_HUMAN Microtubule-associated proteins 1A/1B light chain 3B OS=Homo sapiens OX=9606 GN=MAP1LC3B PE=1 SV=3	4	2	2	2	0	0	0	0	0	0	0	0	0	0	0	0	0	1	0	0	2	1	1	0	1	0	0	0	0	0	0	0	0	0	0	0	0	0	1	0	0	2
H7BXY6;A6NEP9;Q8NG11	H7BXY6;A6NEP9;Q8NG11	1;1;1	1;1;1	1;1;1	Tetraspanin;Tetraspanin-14	TSPAN14	tr|H7BXY6|H7BXY6_HUMAN Tetraspanin OS=Homo sapiens OX=9606 GN=TSPAN14 PE=1 SV=1;tr|A6NEP9|A6NEP9_HUMAN Tetraspanin (Fragment) OS=Homo sapiens OX=9606 GN=TSPAN14 PE=1 SV=2;sp|Q8NG11|TSN14_HUMAN Tetraspanin-14 OS=Homo sapiens OX=9606 GN=TSPAN14 PE=1 SV=1	3	1	1	1	1	1	0	0	0	0	0	0	0	0	0	0	1	1	1	1	1	0	1	0	0	1	1	0	0	0	0	0	0	0	0	0	0	1	1	1	1	1
H7C0V0;Q8WWC4	H7C0V0;Q8WWC4	1;1	1;1	1;1	Uncharacterized protein C2orf47, mitochondrial	C2orf47	tr|H7C0V0|H7C0V0_HUMAN m-AAA protease-interacting protein 1, mitochondrial (Fragment) OS=Homo sapiens OX=9606 GN=MAIP1 PE=1 SV=1;sp|Q8WWC4|MAIP1_HUMAN m-AAA protease-interacting protein 1, mitochondrial OS=Homo sapiens OX=9606 GN=MAIP1 PE=1 SV=1	2	1	1	1	0	1	0	0	0	0	0	0	0	0	0	0	0	1	0	0	0	0	0	1	0	0	1	0	0	0	0	0	0	0	0	0	0	0	1	0	0	0
H7C2Y0;B5MCX3;Q15019	H7C2Y0;B5MCX3;Q15019	1;1;1	1;1;1	1;1;1	Septin-2	SEPT2	tr|H7C2Y0|H7C2Y0_HUMAN Septin-2 (Fragment) OS=Homo sapiens OX=9606 GN=SEPTIN2 PE=1 SV=1;tr|B5MCX3|B5MCX3_HUMAN Septin-2 OS=Homo sapiens OX=9606 GN=SEPTIN2 PE=1 SV=1;sp|Q15019|SEPT2_HUMAN Septin-2 OS=Homo sapiens OX=9606 GN=SEPTIN2 PE=1 SV=1	3	1	1	1	1	0	0	0	1	0	0	0	0	0	0	0	0	0	0	0	0	0	0	0	0	1	0	0	0	1	0	0	0	0	0	0	0	0	0	0	0	0
H7C3I1;F6VDH7;Q3KNR6;P50502;Q8IZP2;Q8NFI4	H7C3I1;F6VDH7;Q3KNR6;P50502;Q8IZP2;Q8NFI4	5;5;5;5;4;4	5;5;5;5;4;4	5;5;5;5;4;4	Hsc70-interacting protein;Putative protein FAM10A4;Putative protein FAM10A5	ST13;ST13P4;ST13P5	tr|H7C3I1|H7C3I1_HUMAN Hsc70-interacting protein (Fragment) OS=Homo sapiens OX=9606 GN=ST13 PE=1 SV=1;tr|F6VDH7|F6VDH7_HUMAN Hsc70-interacting protein (Fragment) OS=Homo sapiens OX=9606 GN=ST13 PE=1 SV=1;tr|Q3KNR6|Q3KNR6_HUMAN Hsc70-interacting protein OS=	6	5	5	5	1	3	1	1	2	2	1	0	0	0	0	1	2	2	2	0	2	1	2	1	1	1	3	1	1	2	2	1	0	0	0	0	1	2	2	2	0	2
H7C3T6;Q9C0H2	H7C3T6;Q9C0H2	1;1	1;1	1;1	Protein tweety homolog;Protein tweety homolog 3	TTYH3	tr|H7C3T6|H7C3T6_HUMAN Protein tweety homolog (Fragment) OS=Homo sapiens OX=9606 GN=TTYH3 PE=1 SV=1;sp|Q9C0H2|TTYH3_HUMAN Protein tweety homolog 3 OS=Homo sapiens OX=9606 GN=TTYH3 PE=1 SV=3	2	1	1	1	1	0	0	0	0	0	0	0	0	0	0	0	0	0	0	0	0	0	0	0	0	1	0	0	0	0	0	0	0	0	0	0	0	0	0	0	0	0
H7C543;F5GXJ9;Q13740	H7C543;F5GXJ9;Q13740	1;1;1	1;1;1	1;1;1	CD166 antigen	ALCAM	tr|H7C543|H7C543_HUMAN Activated leukocyte cell adhesion molecule (Fragment) OS=Homo sapiens OX=9606 GN=ALCAM PE=1 SV=1;tr|F5GXJ9|F5GXJ9_HUMAN Activated leukocyte cell adhesion molecule OS=Homo sapiens OX=9606 GN=ALCAM PE=1 SV=1;sp|Q13740|CD166_HUMAN CD166	3	1	1	1	0	0	0	0	0	0	0	0	0	0	0	0	0	1	1	0	1	0	0	0	0	0	0	0	0	0	0	0	0	0	0	0	0	0	1	1	0	1
I3L3D5;P07737	I3L3D5;P07737	2;2	2;2	2;2	Profilin-1	PFN1	tr|I3L3D5|I3L3D5_HUMAN Profilin (Fragment) OS=Homo sapiens OX=9606 GN=PFN1 PE=1 SV=1;sp|P07737|PROF1_HUMAN Profilin-1 OS=Homo sapiens OX=9606 GN=PFN1 PE=1 SV=2	2	2	2	2	1	0	0	0	0	0	0	0	0	0	0	0	0	0	1	0	0	0	0	0	0	1	0	0	0	0	0	0	0	0	0	0	0	0	0	1	0	0
I3L3E4;I3L4G8;I3L4A1;Q96FZ7	I3L3E4;I3L4G8;I3L4A1;Q96FZ7	2;2;2;2	2;2;2;2	2;2;2;2	Charged multivesicular body protein 6	CHMP6	tr|I3L3E4|I3L3E4_HUMAN Charged multivesicular body protein 6 (Fragment) OS=Homo sapiens OX=9606 GN=CHMP6 PE=1 SV=1;tr|I3L4G8|I3L4G8_HUMAN Charged multivesicular body protein 6 (Fragment) OS=Homo sapiens OX=9606 GN=CHMP6 PE=1 SV=1;tr|I3L4A1|I3L4A1_HUMAN Cha	4	2	2	2	1	0	0	0	0	0	0	0	0	0	0	0	0	0	1	0	0	0	0	0	0	1	0	0	0	0	0	0	0	0	0	0	0	0	0	1	0	0
J3KPS3;P04075;H3BPS8;H3BQN4;H3BUH7;H3BR04;H3BR68;H3BMQ8;H3BU78	J3KPS3;P04075;H3BPS8;H3BQN4;H3BUH7	5;5;4;4;3;2;1;1;1	5;5;4;4;3;2;1;1;1	5;5;4;4;3;2;1;1;1	Fructose-bisphosphate aldolase;Fructose-bisphosphate aldolase A	ALDOA	tr|J3KPS3|J3KPS3_HUMAN Fructose-bisphosphate aldolase OS=Homo sapiens OX=9606 GN=ALDOA PE=1 SV=1;sp|P04075|ALDOA_HUMAN Fructose-bisphosphate aldolase A OS=Homo sapiens OX=9606 GN=ALDOA PE=1 SV=2;tr|H3BPS8|H3BPS8_HUMAN Fructose-bisphosphate aldolase (Fragme	9	5	5	5	3	4	2	2	3	1	0	0	0	0	0	1	0	1	1	1	0	0	1	1	0	3	4	2	2	3	1	0	0	0	0	0	1	0	1	1	1	0
J3KR66;Q96L35;B1AKC9;E9PG71;A0A3B3IRY8;A0A0B4J1T8;P29317;P54762;P54764;P54760;Q15375;P54753;Q9UF33;P29323	J3KR66;Q96L35;B1AKC9;E9PG71;A0A3B3IRY8;A0A0B4J1T8;P29317;P54762;P54764;P54760;Q15375;P54753;Q9UF33;P29323	1;1;1;1;1;1;1;1;1;1;1;1;1;1	1;1;1;1;1;1;1;1;1;1;1;1;1;1	1;1;1;1;1;1;1;1;1;1;1;1;1;1	Receptor protein-tyrosine kinase;Ephrin type-A receptor 2;Ephrin type-B receptor 1;Ephrin type-A receptor 4;Ephrin type-B receptor 4;Ephrin type-A receptor 7;Ephrin type-B receptor 3;Ephrin type-A receptor 6;Ephrin type-B receptor 2	EPHA6;EPHB4;EPHB2;EPHA4;EPHA2;EPHB1;EPHA7;EPHB3	tr|J3KR66|J3KR66_HUMAN Ephrin type-A receptor 6 OS=Homo sapiens OX=9606 GN=EPHA6 PE=1 SV=1;tr|Q96L35|Q96L35_HUMAN Receptor protein-tyrosine kinase OS=Homo sapiens OX=9606 GN=EPHB4 PE=1 SV=1;tr|B1AKC9|B1AKC9_HUMAN Receptor protein-tyrosine kinase OS=Homo sa	14	1	1	1	1	0	0	0	0	0	0	0	0	0	0	0	1	1	0	0	1	0	0	0	0	1	0	0	0	0	0	0	0	0	0	0	0	1	1	0	0	1
J3KRE2;J3KTF8;J3QQX2;P52565;J3KS60;J3KRY1	J3KRE2;J3KTF8;J3QQX2;P52565;J3KS60;J3KRY1	2;2;2;2;1;1	2;2;2;2;1;1	2;2;2;2;1;1	Rho GDP-dissociation inhibitor 1	ARHGDIA	tr|J3KRE2|J3KRE2_HUMAN Rho GDP-dissociation inhibitor 1 OS=Homo sapiens OX=9606 GN=ARHGDIA PE=1 SV=1;tr|J3KTF8|J3KTF8_HUMAN Rho GDP-dissociation inhibitor 1 (Fragment) OS=Homo sapiens OX=9606 GN=ARHGDIA PE=1 SV=8;tr|J3QQX2|J3QQX2_HUMAN Rho GDP-dissociation	6	2	2	2	1	0	0	1	1	0	0	0	0	0	0	1	0	0	1	1	0	0	0	0	0	1	0	0	1	1	0	0	0	0	0	0	1	0	0	1	1	0
J3KT86;Q96GD4;J3QLN8;J3QR41;J3KTD6;J3KRJ2;J3KRF8	J3KT86;Q96GD4;J3QLN8;J3QR41;J3KTD6	5;5;4;3;3;2;1	4;4;3;2;2;1;1	4;4;3;2;2;1;1	Aurora kinase B	AURKB	tr|J3KT86|J3KT86_HUMAN Aurora 1 (Fragment) OS=Homo sapiens OX=9606 GN=AURKB PE=1 SV=1;sp|Q96GD4|AURKB_HUMAN Aurora kinase B OS=Homo sapiens OX=9606 GN=AURKB PE=1 SV=3;tr|J3QLN8|J3QLN8_HUMAN Aurora 1 (Fragment) OS=Homo sapiens OX=9606 GN=AURKB PE=1 SV=8;tr|	7	5	4	4	1	0	0	0	0	0	1	0	0	0	0	0	2	4	2	3	2	0	1	1	0	1	0	0	0	0	0	0	0	0	0	0	0	1	3	1	2	1
J3QKY6;Q8N9M1	J3QKY6;Q8N9M1	1;1	1;1	1;1	Uncharacterized protein C19orf47	C19orf47	tr|J3QKY6|J3QKY6_HUMAN Uncharacterized protein C19orf47 OS=Homo sapiens OX=9606 GN=C19orf47 PE=1 SV=1;sp|Q8N9M1|CS047_HUMAN Uncharacterized protein C19orf47 OS=Homo sapiens OX=9606 GN=C19orf47 PE=1 SV=1	2	1	1	1	1	0	1	0	0	0	0	0	0	0	0	0	0	0	0	0	0	0	0	0	0	1	0	1	0	0	0	0	0	0	0	0	0	0	0	0	0	0
J3QL22;J3QS85;J3KTQ1;J3QKR0;C9JLV5;Q9UNS2	J3QL22;J3QS85;J3KTQ1;J3QKR0;C9JLV5;Q9UNS2	1;1;1;1;1;1	1;1;1;1;1;1	1;1;1;1;1;1	COP9 signalosome complex subunit 3	COPS3	tr|J3QL22|J3QL22_HUMAN COP9 signalosome complex subunit 3 OS=Homo sapiens OX=9606 GN=COPS3 PE=1 SV=1;tr|J3QS85|J3QS85_HUMAN COP9 signalosome complex subunit 3 OS=Homo sapiens OX=9606 GN=COPS3 PE=1 SV=1;tr|J3KTQ1|J3KTQ1_HUMAN COP9 signalosome complex subuni	6	1	1	1	1	0	0	0	0	0	0	0	0	0	0	0	0	0	0	0	0	0	0	0	0	1	0	0	0	0	0	0	0	0	0	0	0	0	0	0	0	0
J3QRU1;P12931;P06241;P07947;Q573B4;P06239	J3QRU1;P12931;P06241;P07947;Q573B4;P06239	2;2;2;2;1;1	2;2;2;2;1;1	2;2;2;2;1;1	Non-specific protein-tyrosine kinase;Proto-oncogene tyrosine-protein kinase Src;Tyrosine-protein kinase Fyn;Tyrosine-protein kinase Yes;Tyrosine-protein kinase Lck	YES1;SRC;FYN;LCK	tr|J3QRU1|J3QRU1_HUMAN Tyrosine-protein kinase OS=Homo sapiens OX=9606 GN=YES1 PE=1 SV=1;sp|P12931|SRC_HUMAN Proto-oncogene tyrosine-protein kinase Src OS=Homo sapiens OX=9606 GN=SRC PE=1 SV=3;sp|P06241|FYN_HUMAN Tyrosine-protein kinase Fyn OS=Homo sapiens	6	2	2	2	0	1	1	1	0	1	1	0	0	0	0	0	0	1	1	0	0	0	0	1	0	0	1	1	1	0	1	1	0	0	0	0	0	0	1	1	0	0
J3QS39;J3QTR3;F5H6Q2;F5GYU3;F5H2Z3;F5H265;B4DV12;F5H388;F5H747;F5GXK7;J3QKN0;Q5PY61;Q96C32;P62987;P62979;P0CG47;P0CG48;M0R1V7;Q49A90;M0R1M6;M0R2S1;A0A2R8Y422;F5GZ39;J3QSA3	J3QS39;J3QTR3;F5H6Q2;F5GYU3;F5H2Z3;F5H265;B4DV12;F5H388;F5H747;F5GXK7;J3QKN0;Q5PY61;Q96C32;P62987;P62979;P0CG47;P0CG48;M0R1V7;Q49A90;M0R1M6;M0R2S1;A0A2R8Y422;F5GZ39;J3QSA3	13;13;13;13;13;13;13;13;13;13;13;13;13;13;13;13;13;10;10;9;9;9;8;7	13;13;13;13;13;13;13;13;13;13;13;13;13;13;13;13;13;10;10;9;9;9;8;7	13;13;13;13;13;13;13;13;13;13;13;13;13;13;13;13;13;10;10;9;9;9;8;7	Ubiquitin-60S ribosomal protein L40;Ubiquitin;60S ribosomal protein L40;Ubiquitin-40S ribosomal protein S27a;Ubiquitin;40S ribosomal protein S27a;Polyubiquitin-B;Ubiquitin;Polyubiquitin-C;Ubiquitin	UBB;RPS27A;UBC;UBA52	tr|J3QS39|J3QS39_HUMAN Polyubiquitin-B (Fragment) OS=Homo sapiens OX=9606 GN=UBB PE=1 SV=1;tr|J3QTR3|J3QTR3_HUMAN Ubiquitin-40S ribosomal protein S27a (Fragment) OS=Homo sapiens OX=9606 GN=RPS27A PE=1 SV=1;tr|F5H6Q2|F5H6Q2_HUMAN Polyubiquitin-C (Fragment)	24	13	13	13	9	8	7	5	11	8	9	1	2	3	3	2	7	7	5	3	5	6	6	5	6	9	8	7	5	11	8	9	1	2	3	3	2	7	7	5	3	5
K7EIG7;J3QRN6;O94832;J3KRL0	K7EIG7;J3QRN6;O94832	3;3;3;1	3;3;3;1	3;3;3;1	Unconventional myosin-Id	MYO1D	tr|K7EIG7|K7EIG7_HUMAN Unconventional myosin-Id OS=Homo sapiens OX=9606 GN=MYO1D PE=1 SV=1;tr|J3QRN6|J3QRN6_HUMAN Unconventional myosin-Id OS=Homo sapiens OX=9606 GN=MYO1D PE=1 SV=1;sp|O94832|MYO1D_HUMAN Unconventional myosin-Id OS=Homo sapiens OX=9606 GN=	4	3	3	3	0	1	0	1	0	0	2	0	0	0	0	0	0	1	0	0	0	0	0	0	0	0	1	0	1	0	0	2	0	0	0	0	0	0	1	0	0	0
K7EIU0;K7EQA9;Q16543	K7EIU0;K7EQA9;Q16543	1;1;1	1;1;1	1;1;1	Hsp90 co-chaperone Cdc37;Hsp90 co-chaperone Cdc37, N-terminally processed	CDC37	tr|K7EIU0|K7EIU0_HUMAN Hsp90 co-chaperone Cdc37 (Fragment) OS=Homo sapiens OX=9606 GN=CDC37 PE=1 SV=1;tr|K7EQA9|K7EQA9_HUMAN Hsp90 chaperone protein kinase-targeting subunit (Fragment) OS=Homo sapiens OX=9606 GN=CDC37 PE=1 SV=1;sp|Q16543|CDC37_HUMAN Hsp90	3	1	1	1	0	1	0	0	0	0	0	0	0	0	0	0	0	0	0	0	0	0	0	0	0	0	1	0	0	0	0	0	0	0	0	0	0	0	0	0	0	0
K7EK06;K7ER16;Q9Y285	K7EK06;K7ER16;Q9Y285	1;1;1	1;1;1	1;1;1	Phenylalanine--tRNA ligase alpha subunit	FARSA	tr|K7EK06|K7EK06_HUMAN Phenylalanine--tRNA ligase alpha subunit (Fragment) OS=Homo sapiens OX=9606 GN=FARSA PE=1 SV=8;tr|K7ER16|K7ER16_HUMAN Phenylalanine--tRNA ligase alpha subunit OS=Homo sapiens OX=9606 GN=FARSA PE=1 SV=1;sp|Q9Y285|SYFA_HUMAN Phenylalan	3	1	1	1	1	0	0	0	0	0	0	0	0	0	0	0	0	0	0	0	0	0	0	0	0	1	0	0	0	0	0	0	0	0	0	0	0	0	0	0	0	0
K7EMP1	K7EMP1	13	1	1		CC2D1A	tr|K7EMP1|K7EMP1_HUMAN Coiled-coil and C2 domain-containing protein 1A (Fragment) OS=Homo sapiens OX=9606 GN=CC2D1A PE=1 SV=1	1	13	1	1	4	3	3	3	1	0	1	0	0	0	0	0	3	3	6	4	3	3	4	4	1	1	0	0	0	0	0	0	0	0	0	0	0	0	0	0	1	0
K7EMV3;A0A590UJJ6;B4DEB1;K7EK07;K7ES00;Q71DI3;Q16695;P84243;P68431;K7EP01;Q6NXT2	K7EMV3;A0A590UJJ6;B4DEB1;K7EK07;K7ES00;Q71DI3;Q16695;P84243;P68431;K7EP01;Q6NXT2	3;3;3;3;3;3;3;3;3;2;2	3;3;3;3;3;3;3;3;3;2;2	1;1;1;1;1;1;1;1;1;0;0	Histone H3;Histone H3.2;Histone H3.1t;Histone H3.3;Histone H3.1;Histone H3.3C	H3F3B;H3F3A;HIST2H3A;HIST3H3;HIST1H3A;H3F3C	tr|K7EMV3|K7EMV3_HUMAN Histone H3 OS=Homo sapiens OX=9606 GN=H3-3B PE=1 SV=1;tr|A0A590UJJ6|A0A590UJJ6_HUMAN Histone H3 OS=Homo sapiens OX=9606 GN=H3-3A PE=1 SV=1;tr|B4DEB1|B4DEB1_HUMAN Histone H3 OS=Homo sapiens OX=9606 GN=H3-3A PE=1 SV=1;tr|K7EK07|K7EK07_	11	3	3	1	1	2	1	2	2	1	1	1	0	3	2	3	0	0	0	1	0	0	1	2	1	1	2	1	2	2	1	1	1	0	3	2	3	0	0	0	1	0
K7ENK9;K7EKX0;J3QRU4;F8WCA0;L7N2F9;Q15836;P63027	K7ENK9;K7EKX0;J3QRU4;F8WCA0;L7N2F9;Q15836;P63027	1;1;1;1;1;1;1	1;1;1;1;1;1;1	1;1;1;1;1;1;1	Vesicle-associated membrane protein 3;Vesicle-associated membrane protein 2	VAMP2;VAMP3	tr|K7ENK9|K7ENK9_HUMAN Vesicle-associated membrane protein 2 OS=Homo sapiens OX=9606 GN=VAMP2 PE=3 SV=1;tr|K7EKX0|K7EKX0_HUMAN Vesicle-associated membrane protein 3 OS=Homo sapiens OX=9606 GN=VAMP3 PE=3 SV=1;tr|J3QRU4|J3QRU4_HUMAN Synaptobrevin-2 OS=Homo s	7	1	1	1	0	0	0	0	0	0	0	0	0	0	0	0	0	0	0	0	1	1	0	0	0	0	0	0	0	0	0	0	0	0	0	0	0	0	0	0	0	1
M0QY01	M0QY01	1	1	1		EPS15L1	tr|M0QY01|M0QY01_HUMAN Epidermal growth factor receptor substrate 15-like 1 (Fragment) OS=Homo sapiens OX=9606 GN=EPS15L1 PE=1 SV=1	1	1	1	1	1	0	1	1	0	0	0	0	0	0	0	0	1	0	0	0	0	0	0	0	0	1	0	1	1	0	0	0	0	0	0	0	0	1	0	0	0	0
M0QYS1;P40429;Q8J015;Q6NVV1	M0QYS1;P40429;Q8J015;Q6NVV1	2;2;1;1	2;2;1;1	2;2;1;1	60S ribosomal protein L13a;Putative 60S ribosomal protein L13a protein RPL13AP3	RPL13A;RPL13a;RPL13AP3	tr|M0QYS1|M0QYS1_HUMAN 60S ribosomal protein L13a (Fragment) OS=Homo sapiens OX=9606 GN=RPL13A PE=1 SV=2;sp|P40429|RL13A_HUMAN 60S ribosomal protein L13a OS=Homo sapiens OX=9606 GN=RPL13A PE=1 SV=2;tr|Q8J015|Q8J015_HUMAN 60S ribosomal protein L13a OS=Homo	4	2	2	2	0	0	0	0	0	0	0	0	0	1	0	2	0	0	0	0	0	0	0	0	0	0	0	0	0	0	0	0	0	0	1	0	2	0	0	0	0	0
M0R0P7;M0R3D6;M0R1A7;M0R117;Q02543	M0R0P7;M0R3D6;M0R1A7;M0R117;Q02543	1;1;1;1;1	1;1;1;1;1	1;1;1;1;1	60S ribosomal protein L18a	RPL18A	tr|M0R0P7|M0R0P7_HUMAN 60S ribosomal protein L18a OS=Homo sapiens OX=9606 GN=RPL18A PE=1 SV=1;tr|M0R3D6|M0R3D6_HUMAN 60S ribosomal protein L18a (Fragment) OS=Homo sapiens OX=9606 GN=RPL18A PE=1 SV=1;tr|M0R1A7|M0R1A7_HUMAN 60S ribosomal protein L18a OS=Homo	5	1	1	1	0	0	0	0	0	0	0	0	0	1	0	1	0	0	0	0	0	0	0	0	0	0	0	0	0	0	0	0	0	0	1	0	1	0	0	0	0	0
O00186	O00186	1	1	1	Syntaxin-binding protein 3	STXBP3	sp|O00186|STXB3_HUMAN Syntaxin-binding protein 3 OS=Homo sapiens OX=9606 GN=STXBP3 PE=1 SV=2	1	1	1	1	0	0	0	1	0	0	0	0	0	0	0	0	0	1	0	0	0	0	0	0	0	0	0	0	1	0	0	0	0	0	0	0	0	0	1	0	0	0
O00299	O00299	4	4	4	Chloride intracellular channel protein 1	CLIC1	sp|O00299|CLIC1_HUMAN Chloride intracellular channel protein 1 OS=Homo sapiens OX=9606 GN=CLIC1 PE=1 SV=4	1	4	4	4	2	1	0	0	2	0	0	0	0	0	0	0	0	0	0	0	0	0	0	0	0	2	1	0	0	2	0	0	0	0	0	0	0	0	0	0	0	0
O00560;B4DHN5;E9PBU7	O00560;B4DHN5;E9PBU7	16;9;9	16;9;9	3;2;2	Syntenin-1	SDCBP	sp|O00560|SDCB1_HUMAN Syntenin-1 OS=Homo sapiens OX=9606 GN=SDCBP PE=1 SV=1;tr|B4DHN5|B4DHN5_HUMAN Syntenin-1 OS=Homo sapiens OX=9606 GN=SDCBP PE=1 SV=1;tr|E9PBU7|E9PBU7_HUMAN Syntenin-1 OS=Homo sapiens OX=9606 GN=SDCBP PE=1 SV=1	3	16	16	3	6	6	3	3	3	2	3	1	0	4	3	4	7	7	8	6	5	5	6	8	7	6	6	3	3	3	2	3	1	0	4	3	4	7	7	8	6	5
O14654	O14654	5	5	5	Insulin receptor substrate 4	IRS4	sp|O14654|IRS4_HUMAN Insulin receptor substrate 4 OS=Homo sapiens OX=9606 GN=IRS4 PE=1 SV=1	1	5	5	5	2	3	0	0	0	0	0	0	0	0	0	0	0	0	0	0	0	0	0	0	0	2	3	0	0	0	0	0	0	0	0	0	0	0	0	0	0	0
O14672;H0YNC5	O14672	8;1	8;1	8;1	Disintegrin and metalloproteinase domain-containing protein 10	ADAM10	sp|O14672|ADA10_HUMAN Disintegrin and metalloproteinase domain-containing protein 10 OS=Homo sapiens OX=9606 GN=ADAM10 PE=1 SV=1	2	8	8	8	2	1	0	0	0	0	1	1	0	0	0	0	3	3	6	3	2	3	2	2	1	2	1	0	0	0	0	1	1	0	0	0	0	3	3	6	3	2
O14828	O14828	3	3	3	Secretory carrier-associated membrane protein 3	SCAMP3	sp|O14828|SCAM3_HUMAN Secretory carrier-associated membrane protein 3 OS=Homo sapiens OX=9606 GN=SCAMP3 PE=1 SV=3	1	3	3	3	2	2	1	2	1	2	2	0	0	0	0	0	0	1	1	0	1	0	1	0	0	2	2	1	2	1	2	2	0	0	0	0	0	0	1	1	0	1
O14965;A3KFJ0;Q5QPD4;A3KFJ1;Q5QPD2;Q5QPD1;A3KFJ2;B4DXA6;A0A0A0MSY3;Q5Y191;Q9UQB9	O14965;A3KFJ0;Q5QPD4	19;15;11;8;7;4;3;1;1;1;1	19;15;11;8;7;4;3;1;1;1;1	18;14;10;7;7;4;3;0;0;0;0	Aurora kinase A	AURKA	sp|O14965|AURKA_HUMAN Aurora kinase A OS=Homo sapiens OX=9606 GN=AURKA PE=1 SV=2;tr|A3KFJ0|A3KFJ0_HUMAN Non-specific serine/threonine protein kinase OS=Homo sapiens OX=9606 GN=AURKA PE=1 SV=1;tr|Q5QPD4|Q5QPD4_HUMAN Non-specific serine/threonine protein kin	11	19	19	18	8	5	6	2	4	2	5	0	0	0	0	0	13	14	14	10	12	8	11	9	7	8	5	6	2	4	2	5	0	0	0	0	0	13	14	14	10	12
O15127;H3BV04;H3BN93;H3BUB6;H3BPL9	O15127;H3BV04;H3BN93;H3BUB6;H3BPL9	2;1;1;1;1	2;1;1;1;1	2;1;1;1;1	Secretory carrier-associated membrane protein 2	SCAMP2	sp|O15127|SCAM2_HUMAN Secretory carrier-associated membrane protein 2 OS=Homo sapiens OX=9606 GN=SCAMP2 PE=1 SV=2;tr|H3BV04|H3BV04_HUMAN Secretory carrier-associated membrane protein (Fragment) OS=Homo sapiens OX=9606 GN=SCAMP2 PE=1 SV=1;tr|H3BN93|H3BN93_H	5	2	2	2	1	0	0	0	0	0	0	0	0	0	0	1	0	1	0	0	0	0	0	0	0	1	0	0	0	0	0	0	0	0	0	0	1	0	1	0	0	0
O43143;A0A140T947;F5H658;O60231;Q14562	O43143	28;1;1;1;1	28;1;1;1;1	28;1;1;1;1	Pre-mRNA-splicing factor ATP-dependent RNA helicase DHX15	DHX15	sp|O43143|DHX15_HUMAN Pre-mRNA-splicing factor ATP-dependent RNA helicase DHX15 OS=Homo sapiens OX=9606 GN=DHX15 PE=1 SV=2	5	28	28	28	0	1	0	0	0	0	0	0	0	0	0	0	18	20	25	21	21	21	11	17	11	0	1	0	0	0	0	0	0	0	0	0	0	18	20	25	21	21
O43633;M0R1L7;M0R1T5;M0QXX8	O43633;M0R1L7;M0R1T5	11;7;7;4	11;7;7;4	11;7;7;4	Charged multivesicular body protein 2a	CHMP2A	sp|O43633|CHM2A_HUMAN Charged multivesicular body protein 2a OS=Homo sapiens OX=9606 GN=CHMP2A PE=1 SV=1;tr|M0R1L7|M0R1L7_HUMAN Charged multivesicular body protein 2a (Fragment) OS=Homo sapiens OX=9606 GN=CHMP2A PE=1 SV=1;tr|M0R1T5|M0R1T5_HUMAN Charged mul	4	11	11	11	3	6	5	1	6	3	0	0	0	0	0	0	2	4	5	2	1	2	2	1	2	3	6	5	1	6	3	0	0	0	0	0	0	2	4	5	2	1
O43657;A0A087WYV6;A0A087WZU5	O43657;A0A087WYV6;A0A087WZU5	7;5;5	7;5;5	7;5;5	Tetraspanin-6	TSPAN6	sp|O43657|TSN6_HUMAN Tetraspanin-6 OS=Homo sapiens OX=9606 GN=TSPAN6 PE=1 SV=1;tr|A0A087WYV6|A0A087WYV6_HUMAN Tetraspanin-6 OS=Homo sapiens OX=9606 GN=TSPAN6 PE=1 SV=1;tr|A0A087WZU5|A0A087WZU5_HUMAN Tetraspanin-6 OS=Homo sapiens OX=9606 GN=TSPAN6 PE=1 SV=1	3	7	7	7	2	2	1	1	1	1	1	1	1	0	0	0	3	3	4	2	3	2	1	3	0	2	2	1	1	1	1	1	1	1	0	0	0	3	3	4	2	3
O43854	O43854	5	5	5	EGF-like repeat and discoidin I-like domain-containing protein 3	EDIL3	sp|O43854|EDIL3_HUMAN EGF-like repeat and discoidin I-like domain-containing protein 3 OS=Homo sapiens OX=9606 GN=EDIL3 PE=1 SV=1	1	5	5	5	2	0	1	0	0	1	1	0	0	0	0	2	0	0	1	0	0	0	1	0	1	2	0	1	0	0	1	1	0	0	0	0	2	0	0	1	0	0
O60673	O60673	1	1	1	DNA polymerase zeta catalytic subunit	REV3L	sp|O60673|REV3L_HUMAN DNA polymerase zeta catalytic subunit OS=Homo sapiens OX=9606 GN=REV3L PE=1 SV=2	1	1	1	1	0	0	0	0	0	0	0	0	0	0	0	0	0	0	1	0	0	0	0	0	0	0	0	0	0	0	0	0	0	0	0	0	0	0	0	1	0	0
O60884;I3L320;A0A087WT48	O60884	7;1;1	7;1;1	7;1;1	DnaJ homolog subfamily A member 2	DNAJA2	sp|O60884|DNJA2_HUMAN DnaJ homolog subfamily A member 2 OS=Homo sapiens OX=9606 GN=DNAJA2 PE=1 SV=1	3	7	7	7	1	1	1	2	2	1	1	0	1	0	0	0	1	1	1	0	1	0	1	0	0	1	1	1	2	2	1	1	0	1	0	0	0	1	1	1	0	1
O75054	O75054	3	3	3	Immunoglobulin superfamily member 3	IGSF3	sp|O75054|IGSF3_HUMAN Immunoglobulin superfamily member 3 OS=Homo sapiens OX=9606 GN=IGSF3 PE=2 SV=3	1	3	3	3	0	0	0	0	0	0	0	0	0	0	0	0	1	2	2	1	0	0	1	0	0	0	0	0	0	0	0	0	0	0	0	0	0	1	2	2	1	0
O75083;D6RD66	O75083;D6RD66	3;2	3;2	3;2	WD repeat-containing protein 1	WDR1	sp|O75083|WDR1_HUMAN WD repeat-containing protein 1 OS=Homo sapiens OX=9606 GN=WDR1 PE=1 SV=4;tr|D6RD66|D6RD66_HUMAN WD repeat-containing protein 1 (Fragment) OS=Homo sapiens OX=9606 GN=WDR1 PE=1 SV=1	2	3	3	3	1	1	0	1	0	0	0	0	0	0	0	1	0	0	0	0	0	0	0	0	0	1	1	0	1	0	0	0	0	0	0	0	1	0	0	0	0	0
O75131;E5RFT7;A0A087WUS8;A0A087WXR6;E5RHZ0;A0A087WYQ3;H0YB26;Q8IYJ1;Q96A23;O95741;Q9HCH3;Q9UBL6	O75131	5;1;1;1;1;1;1;1;1;1;1;1	5;1;1;1;1;1;1;1;1;1;1;1	4;1;1;1;1;1;1;0;0;0;0;0	Copine-3	CPNE3	sp|O75131|CPNE3_HUMAN Copine-3 OS=Homo sapiens OX=9606 GN=CPNE3 PE=1 SV=1	12	5	5	4	1	1	0	0	0	0	1	0	0	0	2	4	1	0	1	1	0	1	1	1	1	1	1	0	0	0	0	1	0	0	0	2	4	1	0	1	1	0
O75351;K7EL71;K7EKZ3;Q6PIW4	O75351	17;1;1;1	17;1;1;1	14;1;1;0	Vacuolar protein sorting-associated protein 4B	VPS4B	sp|O75351|VPS4B_HUMAN Vacuolar protein sorting-associated protein 4B OS=Homo sapiens OX=9606 GN=VPS4B PE=1 SV=2	4	17	17	14	8	11	5	1	3	4	2	0	0	0	0	1	5	8	9	7	5	3	2	7	3	8	11	5	1	3	4	2	0	0	0	0	1	5	8	9	7	5
O75533	O75533	2	2	2	Splicing factor 3B subunit 1	SF3B1	sp|O75533|SF3B1_HUMAN Splicing factor 3B subunit 1 OS=Homo sapiens OX=9606 GN=SF3B1 PE=1 SV=3	1	2	2	2	2	0	0	0	0	0	0	0	0	0	0	0	0	0	0	0	0	0	0	0	0	2	0	0	0	0	0	0	0	0	0	0	0	0	0	0	0	0
O75949	O75949	1	1	1	Transmembrane protein FAM155B	FAM155B	sp|O75949|F155B_HUMAN Transmembrane protein FAM155B OS=Homo sapiens OX=9606 GN=FAM155B PE=2 SV=3	1	1	1	1	0	0	0	0	1	0	0	0	0	0	0	0	0	0	0	0	0	0	0	0	0	0	0	0	0	1	0	0	0	0	0	0	0	0	0	0	0	0
O94973;A0A0G2JS82;E9PR62;A0A0G2JRF9;A0A0G2JQA4;A0A0G2JRS3;M0R2D9;E9PNC4	O94973;A0A0G2JS82	29;27;11;9;9;5;4;4	17;17;6;6;6;4;0;3	5;5;1;1;1;1;0;1	AP-2 complex subunit alpha-2	AP2A2	sp|O94973|AP2A2_HUMAN AP-2 complex subunit alpha-2 OS=Homo sapiens OX=9606 GN=AP2A2 PE=1 SV=2;tr|A0A0G2JS82|A0A0G2JS82_HUMAN AP-2 complex subunit alpha-2 (Fragment) OS=Homo sapiens OX=9606 GN=AP2A2 PE=1 SV=1	8	29	17	5	11	11	4	2	4	0	2	1	0	0	0	0	8	12	16	9	8	8	8	5	6	4	5	1	0	2	0	0	0	0	0	0	0	4	6	11	5	4
O95219	O95219	1	1	1	Sorting nexin-4	SNX4	sp|O95219|SNX4_HUMAN Sorting nexin-4 OS=Homo sapiens OX=9606 GN=SNX4 PE=1 SV=1	1	1	1	1	1	0	0	0	0	0	0	0	0	0	0	0	0	0	0	0	0	0	0	0	0	1	0	0	0	0	0	0	0	0	0	0	0	0	0	0	0	0
O95297;Q9UEL6	O95297	3;1	3;1	3;1	Myelin protein zero-like protein 1	MPZL1	sp|O95297|MPZL1_HUMAN Myelin protein zero-like protein 1 OS=Homo sapiens OX=9606 GN=MPZL1 PE=1 SV=1	2	3	3	3	0	1	0	1	0	0	0	0	0	0	0	0	1	1	2	1	0	0	1	1	0	0	1	0	1	0	0	0	0	0	0	0	0	1	1	2	1	0
O95630;C9JK83;C9JEK5;F5H5B9;C9JZ93	O95630;C9JK83	8;5;2;2;1	8;5;2;2;1	8;5;2;2;1	STAM-binding protein	STAMBP	sp|O95630|STABP_HUMAN STAM-binding protein OS=Homo sapiens OX=9606 GN=STAMBP PE=1 SV=1;tr|C9JK83|C9JK83_HUMAN STAM-binding protein (Fragment) OS=Homo sapiens OX=9606 GN=STAMBP PE=1 SV=1	5	8	8	8	5	2	1	2	1	2	0	0	0	0	0	0	0	2	3	2	0	1	0	1	0	5	2	1	2	1	2	0	0	0	0	0	0	0	2	3	2	0
O95782	O95782	34	34	22	AP-2 complex subunit alpha-1	AP2A1	sp|O95782|AP2A1_HUMAN AP-2 complex subunit alpha-1 OS=Homo sapiens OX=9606 GN=AP2A1 PE=1 SV=3	1	34	34	22	13	12	7	3	4	2	3	1	0	0	0	0	13	18	20	15	13	12	10	8	10	13	12	7	3	4	2	3	1	0	0	0	0	13	18	20	15	13
O95822	O95822	3	3	3	Malonyl-CoA decarboxylase, mitochondrial	MLYCD	sp|O95822|DCMC_HUMAN Malonyl-CoA decarboxylase, mitochondrial OS=Homo sapiens OX=9606 GN=MLYCD PE=1 SV=3	1	3	3	3	0	1	1	0	1	0	0	0	0	0	0	0	0	0	1	0	1	0	1	1	0	0	1	1	0	1	0	0	0	0	0	0	0	0	0	1	0	1
P00338	P00338	3	2	2	L-lactate dehydrogenase A chain	LDHA	sp|P00338|LDHA_HUMAN L-lactate dehydrogenase A chain OS=Homo sapiens OX=9606 GN=LDHA PE=1 SV=2	1	3	2	2	0	2	0	0	1	1	2	0	0	0	0	0	0	0	0	0	0	0	0	0	0	0	1	0	0	0	0	1	0	0	0	0	0	0	0	0	0	0
P00558;P07205	P00558	3;1	3;1	3;1	Phosphoglycerate kinase 1	PGK1	sp|P00558|PGK1_HUMAN Phosphoglycerate kinase 1 OS=Homo sapiens OX=9606 GN=PGK1 PE=1 SV=3	2	3	3	3	1	0	0	0	0	0	0	0	0	0	0	0	0	1	0	1	0	0	0	0	0	1	0	0	0	0	0	0	0	0	0	0	0	0	1	0	1	0
P00742	P00742	4	4	4	Coagulation factor X;Factor X light chain;Factor X heavy chain;Activated factor Xa heavy chain	F10	sp|P00742|FA10_HUMAN Coagulation factor X OS=Homo sapiens OX=9606 GN=F10 PE=1 SV=2	1	4	4	4	1	2	2	2	2	0	2	1	1	1	0	3	3	4	3	3	2	2	1	2	3	1	2	2	2	2	0	2	1	1	1	0	3	3	4	3	3	2
P01024	P01024	6	1	1	Complement C3;Complement C3 beta chain;C3-beta-c;Complement C3 alpha chain;C3a anaphylatoxin;Acylation stimulating protein;Complement C3b alpha chain;Complement C3c alpha chain fragment 1;Complement C3dg fragment;Complement C3g fragment;Complement C3d fragment;Complement C3f fragment;Complement C3c alpha chain fragment 2	C3	sp|P01024|CO3_HUMAN Complement C3 OS=Homo sapiens OX=9606 GN=C3 PE=1 SV=2	1	6	1	1	2	0	0	3	0	0	2	0	0	0	0	4	0	1	3	2	1	0	1	2	0	1	0	0	0	0	0	0	0	0	0	0	0	0	0	1	0	0
P01111;G3V4K2;G3V5T7	P01111	6;2;2	6;2;2	2;0;0	GTPase NRas	NRAS	sp|P01111|RASN_HUMAN GTPase NRas OS=Homo sapiens OX=9606 GN=NRAS PE=1 SV=1	3	6	6	2	3	1	2	0	2	1	1	0	0	0	0	0	5	4	4	2	1	2	4	4	1	3	1	2	0	2	1	1	0	0	0	0	0	5	4	4	2	1
P01112	P01112	4	1	0	GTPase HRas;GTPase HRas, N-terminally processed	HRAS	sp|P01112|RASH_HUMAN GTPase HRas OS=Homo sapiens OX=9606 GN=HRAS PE=1 SV=1	1	4	1	0	2	2	1	0	2	1	0	0	0	0	0	0	3	3	1	1	1	2	2	3	1	0	1	0	0	1	0	0	0	0	0	0	0	1	1	0	0	1
P02042;E9PFT6;E9PEW8;A0A0J9YWK4;C9JRG0	P02042;E9PFT6;E9PEW8	9;6;5;1;1	3;2;2;0;0	3;2;2;0;0	Hemoglobin subunit delta	HBD	sp|P02042|HBD_HUMAN Hemoglobin subunit delta OS=Homo sapiens OX=9606 GN=HBD PE=1 SV=2;tr|E9PFT6|E9PFT6_HUMAN Hemoglobin subunit delta OS=Homo sapiens OX=9606 GN=HBD PE=1 SV=1;tr|E9PEW8|E9PEW8_HUMAN Hemoglobin subunit delta (Fragment) OS=Homo sapiens OX=960	5	9	3	3	1	1	1	1	2	1	3	1	6	1	1	1	2	2	2	2	2	2	2	2	1	0	0	0	0	1	0	0	1	2	0	0	0	0	0	0	0	0
P02452	P02452	3	3	3	Collagen alpha-1(I) chain	COL1A1	sp|P02452|CO1A1_HUMAN Collagen alpha-1(I) chain OS=Homo sapiens OX=9606 GN=COL1A1 PE=1 SV=5	1	3	3	3	0	0	0	0	0	1	0	2	1	0	0	0	0	0	0	0	0	0	0	0	0	0	0	0	0	0	1	0	2	1	0	0	0	0	0	0	0	0
P02751;H0Y7Z1	P02751	3;1	3;1	3;1	Fibronectin;Anastellin;Ugl-Y1;Ugl-Y2;Ugl-Y3	FN1	sp|P02751|FINC_HUMAN Fibronectin OS=Homo sapiens OX=9606 GN=FN1 PE=1 SV=5	2	3	3	3	0	0	0	0	0	0	1	0	0	0	0	2	0	0	0	0	0	0	0	0	0	0	0	0	0	0	0	1	0	0	0	0	2	0	0	0	0	0
P02786;G3V0E5;F8WBE5;H7C3V5	P02786;G3V0E5	9;7;2;1	9;7;2;1	9;7;2;1	Transferrin receptor protein 1;Transferrin receptor protein 1, serum form	TFRC	sp|P02786|TFR1_HUMAN Transferrin receptor protein 1 OS=Homo sapiens OX=9606 GN=TFRC PE=1 SV=2;tr|G3V0E5|G3V0E5_HUMAN Transferrin receptor protein 1 OS=Homo sapiens OX=9606 GN=TFRC PE=1 SV=1	4	9	9	9	4	2	2	2	3	3	4	0	0	1	1	3	3	5	3	4	4	3	3	1	1	4	2	2	2	3	3	4	0	0	1	1	3	3	5	3	4	4
P04040	P04040	2	2	2	Catalase	CAT	sp|P04040|CATA_HUMAN Catalase OS=Homo sapiens OX=9606 GN=CAT PE=1 SV=3	1	2	2	2	0	0	0	0	0	0	0	0	0	0	0	0	0	0	0	0	0	0	1	0	1	0	0	0	0	0	0	0	0	0	0	0	0	0	0	0	0	0
P04259	P04259	25	1	1	Keratin, type II cytoskeletal 6B	KRT6B	sp|P04259|K2C6B_HUMAN Keratin, type II cytoskeletal 6B OS=Homo sapiens OX=9606 GN=KRT6B PE=1 SV=5	1	25	1	1	5	5	4	3	2	2	2	1	0	8	5	8	11	12	12	16	14	11	7	12	11	0	0	0	0	0	0	0	0	0	0	0	0	0	0	1	1	1
P04264;CON__P04264;CON__H-INV:HIT000016045;F8VP67	P04264;CON__P04264	46;44;1;1	46;44;1;1	35;33;0;0	Keratin, type II cytoskeletal 1	KRT1	sp|P04264|K2C1_HUMAN Keratin, type II cytoskeletal 1 OS=Homo sapiens OX=9606 GN=KRT1 PE=1 SV=6;	4	46	46	35	20	21	15	11	8	9	13	3	1	23	20	30	32	36	34	35	35	35	30	29	29	20	21	15	11	8	9	13	3	1	23	20	30	32	36	34	35	35
P04406;E7EUT5	P04406;E7EUT5	6;5	6;5	6;5	Glyceraldehyde-3-phosphate dehydrogenase	GAPDH	sp|P04406|G3P_HUMAN Glyceraldehyde-3-phosphate dehydrogenase OS=Homo sapiens OX=9606 GN=GAPDH PE=1 SV=3;tr|E7EUT5|E7EUT5_HUMAN Glyceraldehyde-3-phosphate dehydrogenase OS=Homo sapiens OX=9606 GN=GAPDH PE=1 SV=1	2	6	6	6	3	2	2	3	2	0	1	0	0	2	1	3	2	2	4	5	3	2	3	2	2	3	2	2	3	2	0	1	0	0	2	1	3	2	2	4	5	3
P04899;P63096;P09471;A0A1W2PRE1;A2A2R6;A0A1W2PQK2;A0A087WTB6;Q5JWD1;H0Y7E8;A0A1W2PRJ7;A0A087WZE5;A0A1W2PS82;A0A3B3IUA8;A0A3B3ITM0;Q5JWE9;H3BTM2;A0A1W2PP38;H0Y7F4;P11488;P19087;A8MTJ3	P04899	5;2;2;1;1;1;1;1;1;1;1;1;1;1;1;1;1;1;1;1;1	3;0;0;0;0;0;0;0;0;0;0;0;0;0;0;0;0;0;0;0;0	3;0;0;0;0;0;0;0;0;0;0;0;0;0;0;0;0;0;0;0;0	Guanine nucleotide-binding protein G(i) subunit alpha-2	GNAI2	sp|P04899|GNAI2_HUMAN Guanine nucleotide-binding protein G(i) subunit alpha-2 OS=Homo sapiens OX=9606 GN=GNAI2 PE=1 SV=3	21	5	3	3	3	3	3	2	2	2	2	0	0	1	1	2	2	2	3	1	1	1	1	2	1	2	2	2	1	1	1	1	0	0	0	0	1	1	1	1	0	0
P05023;M0R116;A0A2R8YEY8;A0A0A0MT26;P13637;B1AKY9;P50993;H0Y7C1;Q13733;Q5TC01;E9PRA5;Q5TC02;A0A669K9X0;M0QXF2;P20648;P54707	P05023	29;12;12;12;12;10;10;8;6;4;4;3;3;2;2;2	29;12;12;12;12;10;10;8;6;4;4;3;3;2;2;2	29;12;12;12;12;10;10;8;6;4;4;3;3;2;2;2	Sodium/potassium-transporting ATPase subunit alpha-1	ATP1A1	sp|P05023|AT1A1_HUMAN Sodium/potassium-transporting ATPase subunit alpha-1 OS=Homo sapiens OX=9606 GN=ATP1A1 PE=1 SV=1	16	29	29	29	10	14	11	10	11	11	8	0	1	7	7	8	9	10	16	13	12	9	12	9	4	10	14	11	10	11	11	8	0	1	7	7	8	9	10	16	13	12
P05106;H3BM21;I3L4X8	P05106;H3BM21	12;9;4	12;9;4	12;9;4	Integrin beta-3;Integrin beta	ITGB3	sp|P05106|ITB3_HUMAN Integrin beta-3 OS=Homo sapiens OX=9606 GN=ITGB3 PE=1 SV=2;tr|H3BM21|H3BM21_HUMAN Integrin beta (Fragment) OS=Homo sapiens OX=9606 PE=3 SV=1	3	12	12	12	8	8	2	2	3	3	2	1	0	0	0	1	1	2	3	2	2	1	1	0	0	8	8	2	2	3	3	2	1	0	0	0	1	1	2	3	2	2
P05109	P05109	2	2	2	Protein S100-A8;Protein S100-A8, N-terminally processed	S100A8	sp|P05109|S10A8_HUMAN Protein S100-A8 OS=Homo sapiens OX=9606 GN=S100A8 PE=1 SV=1	1	2	2	2	0	0	0	0	0	0	0	0	0	0	0	1	0	1	1	2	1	1	0	1	0	0	0	0	0	0	0	0	0	0	0	0	1	0	1	1	2	1
P05556;C9JPK5;Q5T3E6;E9PLR6;E7EUI6;E7EQW5;H7C4N8;E7ERX5	P05556	11;2;2;2;2;2;1;1	11;2;2;2;2;2;1;1	11;2;2;2;2;2;1;1	Integrin beta-1	ITGB1	sp|P05556|ITB1_HUMAN Integrin beta-1 OS=Homo sapiens OX=9606 GN=ITGB1 PE=1 SV=2	8	11	11	11	6	3	1	2	1	1	3	0	0	0	0	0	1	3	7	4	3	1	1	1	1	6	3	1	2	1	1	3	0	0	0	0	0	1	3	7	4	3
P05771;H3BV73	P05771;H3BV73	2;1	2;1	2;1	Protein kinase C beta type	PRKCB	sp|P05771|KPCB_HUMAN Protein kinase C beta type OS=Homo sapiens OX=9606 GN=PRKCB PE=1 SV=4;tr|H3BV73|H3BV73_HUMAN Protein kinase C beta type (Fragment) OS=Homo sapiens OX=9606 GN=PRKCB PE=1 SV=1	2	2	2	2	0	0	0	0	0	0	1	0	0	0	0	0	0	1	0	0	0	0	0	0	0	0	0	0	0	0	0	1	0	0	0	0	0	0	1	0	0	0
P06702	P06702	1	1	1	Protein S100-A9	S100A9	sp|P06702|S10A9_HUMAN Protein S100-A9 OS=Homo sapiens OX=9606 GN=S100A9 PE=1 SV=1	1	1	1	1	0	0	0	0	0	0	0	0	0	0	0	0	0	0	1	1	1	1	0	0	0	0	0	0	0	0	0	0	0	0	0	0	0	0	0	1	1	1
P06733;A0A2R8Y6G6;K7ERS8;A0A2R8Y879;A0A2R8YEM5;K7EM90;A0A2R8Y798;A0A2R8YEG5;A0A2R8Y6I8;F5H1C3;E5RI09;E5RG95;K7EPM1;K7EKN2;E5RGZ4;F5H0C8;P13929;P09104	P06733;A0A2R8Y6G6	12;11;5;5;5;5;4;4;1;1;1;1;1;1;1;1;1;1	12;11;5;5;5;5;4;4;1;1;1;1;1;1;1;1;1;1	12;11;5;5;5;5;4;4;1;1;1;1;1;1;1;1;1;1	Alpha-enolase	ENO1	sp|P06733|ENOA_HUMAN Alpha-enolase OS=Homo sapiens OX=9606 GN=ENO1 PE=1 SV=2;tr|A0A2R8Y6G6|A0A2R8Y6G6_HUMAN 2-phospho-D-glycerate hydro-lyase OS=Homo sapiens OX=9606 GN=ENO1 PE=1 SV=1	18	12	12	12	4	5	3	4	3	0	2	0	0	0	2	2	1	3	4	2	2	2	2	1	1	4	5	3	4	3	0	2	0	0	0	2	2	1	3	4	2	2
P07195;A8MW50;A0A3B3IS95;A0A5F9ZHM4;F5H793;C9J7H8;F5H5G7;F5H155;A0A087WUM2;G3XAP5;F5H245;Q6ZMR3;P07864	P07195;A8MW50;A0A3B3IS95;A0A5F9ZHM4;F5H793;C9J7H8	5;4;4;4;3;3;1;1;1;1;1;1;1	5;4;4;4;3;3;1;1;1;1;1;1;1	4;3;3;3;3;3;0;0;0;0;0;0;0	L-lactate dehydrogenase B chain;L-lactate dehydrogenase	LDHB	sp|P07195|LDHB_HUMAN L-lactate dehydrogenase B chain OS=Homo sapiens OX=9606 GN=LDHB PE=1 SV=2;tr|A8MW50|A8MW50_HUMAN L-lactate dehydrogenase (Fragment) OS=Homo sapiens OX=9606 GN=LDHB PE=1 SV=1;tr|A0A3B3IS95|A0A3B3IS95_HUMAN L-lactate dehydrogenase OS=Hom	13	5	5	4	1	2	0	0	1	1	2	0	0	0	0	1	0	1	0	0	0	0	0	0	0	1	2	0	0	1	1	2	0	0	0	0	1	0	1	0	0	0
P07355;H0YMD0;H0YMU9;H0YN42;H0YMM1;H0YKS4;A6NMY6;H0YKZ7;H0YLV6;H0YMT9;H0YKX9;H0YKV8;H0YKL9;H0YMW4;H0YNP5;H0YM50;H0YMD9;H0YNB8;H0YKN4;H0YNA0;H0YN28;H0YL33;H0YLE2;H0YN52	P07355;H0YMD0;H0YMU9;H0YN42;H0YMM1;H0YKS4;A6NMY6;H0YKZ7;H0YLV6;H0YMT9;H0YKX9	11;9;9;9;8;8;8;6;6;6;6;5;5;5;5;5;4;3;3;3;3;3;2;2	11;9;9;9;8;8;8;6;6;6;6;5;5;5;5;5;4;3;3;3;3;3;2;2	11;9;9;9;8;8;8;6;6;6;6;5;5;5;5;5;4;3;3;3;3;3;2;2	Annexin A2;Annexin;Putative annexin A2-like protein	ANXA2;ANXA2P2	sp|P07355|ANXA2_HUMAN Annexin A2 OS=Homo sapiens OX=9606 GN=ANXA2 PE=1 SV=2;tr|H0YMD0|H0YMD0_HUMAN Annexin (Fragment) OS=Homo sapiens OX=9606 GN=ANXA2 PE=1 SV=1;tr|H0YMU9|H0YMU9_HUMAN Annexin OS=Homo sapiens OX=9606 GN=ANXA2 PE=1 SV=1;tr|H0YN42|H0YN42_HUMA	24	11	11	11	4	4	2	1	0	0	3	0	0	1	0	3	2	4	4	5	3	3	1	0	0	4	4	2	1	0	0	3	0	0	1	0	3	2	4	4	5	3
P07567	P07567	62	5	5			sp|P07567|GAG_MPMV Gag polyprotein OS=Mason-Pfizer monkey virus OX=11855 GN=gag PE=1 SV=3	1	62	5	5	36	35	31	17	23	18	22	3	0	9	5	0	35	39	37	35	32	35	31	31	27	3	1	1	1	0	0	3	0	0	0	0	0	3	4	4	3	2
P07572;E9PGM3	P07572;E9PGM3	109;72	109;72	52;16		DEPDC4	sp|P07572|POL_MPMV Gag-Pro-Pol polyprotein OS=Mason-Pfizer monkey virus OX=11855 GN=gag-pro-pol PE=1 SV=2;tr|E9PGM3|E9PGM3_HUMAN DEP domain-containing protein 4 (Fragment) OS=Homo sapiens OX=9606 GN=DEPDC4 PE=4 SV=2	2	109	109	52	56	58	42	22	37	23	26	4	1	9	5	0	66	77	76	67	61	66	56	59	48	56	58	42	22	37	23	26	4	1	9	5	0	66	77	76	67	61
P07900;G3V2J8;Q14568;Q58FF6;Q58FG0	P07900	17;6;3;2;1	9;2;1;0;1	9;2;1;0;1	Heat shock protein HSP 90-alpha	HSP90AA1	sp|P07900|HS90A_HUMAN Heat shock protein HSP 90-alpha OS=Homo sapiens OX=9606 GN=HSP90AA1 PE=1 SV=5	5	17	9	9	4	5	4	3	5	4	3	0	0	3	1	2	5	8	10	6	5	6	7	3	5	2	1	3	1	2	2	2	0	0	0	0	1	3	3	5	2	1
P07948;H0Y3C5;J3KPD6;P08631	P07948;H0Y3C5;J3KPD6;P08631	2;1;1;1	2;1;1;1	2;1;1;1	Tyrosine-protein kinase Lyn;Non-specific protein-tyrosine kinase;Tyrosine-protein kinase HCK	LYN;HCK	sp|P07948|LYN_HUMAN Tyrosine-protein kinase Lyn OS=Homo sapiens OX=9606 GN=LYN PE=1 SV=3;tr|H0Y3C5|H0Y3C5_HUMAN Tyrosine-protein kinase OS=Homo sapiens OX=9606 GN=HCK PE=1 SV=1;tr|J3KPD6|J3KPD6_HUMAN Tyrosine-protein kinase OS=Homo sapiens OX=9606 GN=HCK P	4	2	2	2	1	0	0	1	0	1	0	0	0	0	0	0	0	0	0	0	0	0	0	0	0	1	0	0	1	0	1	0	0	0	0	0	0	0	0	0	0	0
P08238;Q58FF7;F8W026;Q96GW1;A0A1W2PRR1	P08238	21;8;1;1;1	21;8;1;1;1	12;4;0;0;0	Heat shock protein HSP 90-beta	HSP90AB1	sp|P08238|HS90B_HUMAN Heat shock protein HSP 90-beta OS=Homo sapiens OX=9606 GN=HSP90AB1 PE=1 SV=4	5	21	21	12	9	8	4	3	8	4	3	0	0	4	1	6	7	13	15	11	12	8	9	6	6	9	8	4	3	8	4	3	0	0	4	1	6	7	13	15	11	12
P08590	P08590	1	1	1	Myosin light chain 3	MYL3	sp|P08590|MYL3_HUMAN Myosin light chain 3 OS=Homo sapiens OX=9606 GN=MYL3 PE=1 SV=3	1	1	1	1	0	0	0	0	0	0	1	0	0	0	0	0	0	0	0	0	0	0	0	0	0	0	0	0	0	0	0	1	0	0	0	0	0	0	0	0	0	0
P08648	P08648	2	2	2	Integrin alpha-5;Integrin alpha-5 heavy chain;Integrin alpha-5 light chain	ITGA5	sp|P08648|ITA5_HUMAN Integrin alpha-5 OS=Homo sapiens OX=9606 GN=ITGA5 PE=1 SV=2	1	2	2	2	0	0	0	1	0	0	0	0	0	0	0	0	0	1	1	0	0	0	0	0	0	0	0	0	1	0	0	0	0	0	0	0	0	0	1	1	0	0
P08754	P08754	5	4	3	Guanine nucleotide-binding protein G(k) subunit alpha	GNAI3	sp|P08754|GNAI3_HUMAN Guanine nucleotide-binding protein G(i) subunit alpha OS=Homo sapiens OX=9606 GN=GNAI3 PE=1 SV=3	1	5	4	3	1	1	1	1	1	1	2	0	0	1	1	2	2	3	3	2	1	2	1	2	1	0	0	0	0	0	0	1	0	0	0	0	1	1	2	2	1	0
P08758;E9PHT9;D6RBE9;D6RCN3	P08758;E9PHT9;D6RBE9	9;5;5;1	9;5;5;1	3;3;1;1	Annexin A5;Annexin	ANXA5	sp|P08758|ANXA5_HUMAN Annexin A5 OS=Homo sapiens OX=9606 GN=ANXA5 PE=1 SV=2;tr|E9PHT9|E9PHT9_HUMAN Annexin OS=Homo sapiens OX=9606 GN=ANXA5 PE=1 SV=1;tr|D6RBE9|D6RBE9_HUMAN Annexin OS=Homo sapiens OX=9606 GN=ANXA5 PE=1 SV=1	4	9	9	3	3	3	1	1	1	0	0	0	0	0	1	6	0	2	3	1	0	0	1	0	1	3	3	1	1	1	0	0	0	0	0	1	6	0	2	3	1	0
P09543;K7ERC4	P09543	49;20	49;20	32;5	2,3-cyclic-nucleotide 3-phosphodiesterase	CNP	sp|P09543|CN37_HUMAN 2,3-cyclic-nucleotide 3-phosphodiesterase OS=Homo sapiens OX=9606 GN=CNP PE=1 SV=2	2	49	49	32	30	26	21	19	23	16	13	3	4	0	0	0	17	23	21	18	15	16	17	19	14	30	26	21	19	23	16	13	3	4	0	0	0	17	23	21	18	15
P09874;Q5VX84;Q5VX85	P09874	16;1;1	16;1;1	16;1;1	Poly [ADP-ribose] polymerase 1	PARP1	sp|P09874|PARP1_HUMAN Poly [ADP-ribose] polymerase 1 OS=Homo sapiens OX=9606 GN=PARP1 PE=1 SV=4	3	16	16	16	3	2	1	1	2	0	2	0	0	5	0	14	1	1	3	0	0	1	1	1	0	3	2	1	1	2	0	2	0	0	5	0	14	1	1	3	0	0
P10412;P22492;P16403;Q02539;P16402	P10412;P22492;P16403;Q02539;P16402	3;2;2;2;2	3;2;2;2;2	3;2;2;2;2	Histone H1.4;Histone H1t;Histone H1.2;Histone H1.1;Histone H1.3	HIST1H1E;HIST1H1T;HIST1H1C;HIST1H1A;HIST1H1D	sp|P10412|H14_HUMAN Histone H1.4 OS=Homo sapiens OX=9606 GN=H1-4 PE=1 SV=2;sp|P22492|H1T_HUMAN Histone H1t OS=Homo sapiens OX=9606 GN=H1-6 PE=2 SV=4;sp|P16403|H12_HUMAN Histone H1.2 OS=Homo sapiens OX=9606 GN=H1-2 PE=1 SV=2;sp|Q02539|H11_HUMAN Histone H1.1	5	3	3	3	0	0	0	0	0	0	2	0	0	1	0	0	0	0	0	0	0	0	0	0	0	0	0	0	0	0	0	2	0	0	1	0	0	0	0	0	0	0
P11021	P11021	4	3	3	78 kDa glucose-regulated protein	HSPA5	sp|P11021|BIP_HUMAN Endoplasmic reticulum chaperone BiP OS=Homo sapiens OX=9606 GN=HSPA5 PE=1 SV=2	1	4	3	3	0	2	1	1	1	1	1	0	0	0	0	1	1	1	1	2	1	1	1	1	1	0	1	0	0	0	0	0	0	0	0	0	1	0	0	0	1	0
P11142;E9PKE3;E9PNE6;A8K7Q2;E9PLF4;E9PQQ4;E9PQK7;E9PK54;E9PPY6;E9PI65;P54652;E9PN25;E9PS65;E9PM13	P11142;E9PKE3;E9PNE6;A8K7Q2	44;42;31;24;17;16;16;16;13;13;12;11;10;7	41;39;28;23;15;14;14;14;11;11;9;9;9;6	15;15;15;11;4;4;4;4;4;2;0;4;9;6	Heat shock cognate 71 kDa protein	HSPA8	sp|P11142|HSP7C_HUMAN Heat shock cognate 71 kDa protein OS=Homo sapiens OX=9606 GN=HSPA8 PE=1 SV=1;tr|E9PKE3|E9PKE3_HUMAN Heat shock cognate 71 kDa protein OS=Homo sapiens OX=9606 GN=HSPA8 PE=1 SV=1;tr|E9PNE6|E9PNE6_HUMAN Heat shock cognate 71 kDa protein	14	44	41	15	25	27	26	18	22	14	15	0	2	8	8	15	22	23	26	22	24	23	20	19	17	24	26	24	18	20	13	14	0	1	7	7	14	21	22	25	21	23
P11166;A0A590UJ26	P11166	5;1	5;1	5;1	Solute carrier family 2, facilitated glucose transporter member 1	SLC2A1	sp|P11166|GTR1_HUMAN Solute carrier family 2, facilitated glucose transporter member 1 OS=Homo sapiens OX=9606 GN=SLC2A1 PE=1 SV=2	2	5	5	5	2	1	0	1	1	0	2	0	0	1	0	1	1	2	2	0	1	0	1	2	0	2	1	0	1	1	0	2	0	0	1	0	1	1	2	2	0	1
P11169;Q8TDB8	P11169;Q8TDB8	1;1	1;1	1;1	Solute carrier family 2, facilitated glucose transporter member 3;Solute carrier family 2, facilitated glucose transporter member 14	SLC2A3;SLC2A14	sp|P11169|GTR3_HUMAN Solute carrier family 2, facilitated glucose transporter member 3 OS=Homo sapiens OX=9606 GN=SLC2A3 PE=1 SV=1;sp|Q8TDB8|GTR14_HUMAN Solute carrier family 2, facilitated glucose transporter member 14 OS=Homo sapiens OX=9606 GN=SLC2A14 P	2	1	1	1	1	1	0	0	0	0	0	0	0	0	0	0	0	0	0	1	0	0	0	0	1	1	1	0	0	0	0	0	0	0	0	0	0	0	0	0	1	0
P11233;H7C3P7;P11234;F8WEQ6;C9JPE8;C9JYR1;C9J6B1;C9JQB3	P11233;H7C3P7;P11234	4;3;2;1;1;1;1;1	4;3;2;1;1;1;1;1	4;3;2;1;1;1;1;1	Ras-related protein Ral-A;Ras-related protein Ral-B	RALA;RALB	sp|P11233|RALA_HUMAN Ras-related protein Ral-A OS=Homo sapiens OX=9606 GN=RALA PE=1 SV=1;tr|H7C3P7|H7C3P7_HUMAN Ras-related protein Ral-A (Fragment) OS=Homo sapiens OX=9606 GN=RALA PE=1 SV=1;sp|P11234|RALB_HUMAN Ras-related protein Ral-B OS=Homo sapiens OX	8	4	4	4	1	1	0	0	0	0	0	0	0	0	0	0	2	2	3	2	1	2	1	2	2	1	1	0	0	0	0	0	0	0	0	0	0	2	2	3	2	1
P12273	P12273	1	1	1	Prolactin-inducible protein	PIP	sp|P12273|PIP_HUMAN Prolactin-inducible protein OS=Homo sapiens OX=9606 GN=PIP PE=1 SV=1	1	1	1	1	0	0	0	0	0	0	0	0	0	0	0	1	0	0	0	0	0	0	0	0	0	0	0	0	0	0	0	0	0	0	0	0	1	0	0	0	0	0
P12277;G3V461;G3V4N7	P12277;G3V461;G3V4N7	2;1;1	2;1;1	2;1;1	Creatine kinase B-type	CKB	sp|P12277|KCRB_HUMAN Creatine kinase B-type OS=Homo sapiens OX=9606 GN=CKB PE=1 SV=1;tr|G3V461|G3V461_HUMAN Creatine kinase (Fragment) OS=Homo sapiens OX=9606 GN=CKB PE=1 SV=1;tr|G3V4N7|G3V4N7_HUMAN Creatine kinase (Fragment) OS=Homo sapiens OX=9606 GN=CKB	3	2	2	2	2	1	0	0	0	0	0	0	0	0	0	0	0	0	0	0	0	0	0	0	0	2	1	0	0	0	0	0	0	0	0	0	0	0	0	0	0	0
P12883;P13533;P12882;P11055;Q9UKX2	P12883;P13533	8;5;1;1;1	8;5;1;1;1	8;5;1;1;1	Myosin-7;Myosin-6	MYH7;MYH6	sp|P12883|MYH7_HUMAN Myosin-7 OS=Homo sapiens OX=9606 GN=MYH7 PE=1 SV=5;sp|P13533|MYH6_HUMAN Myosin-6 OS=Homo sapiens OX=9606 GN=MYH6 PE=1 SV=5	5	8	8	8	0	0	0	0	0	0	8	0	0	0	0	0	0	0	0	0	0	0	0	0	0	0	0	0	0	0	0	8	0	0	0	0	0	0	0	0	0	0
P13473	P13473	1	1	1	Lysosome-associated membrane glycoprotein 2	LAMP2	sp|P13473|LAMP2_HUMAN Lysosome-associated membrane glycoprotein 2 OS=Homo sapiens OX=9606 GN=LAMP2 PE=1 SV=2	1	1	1	1	1	1	0	0	0	0	0	0	0	1	0	1	1	0	1	1	0	0	0	0	0	1	1	0	0	0	0	0	0	0	1	0	1	1	0	1	1	0
P13639;K7EJ74;K7EP67;Q15029	P13639	15;1;1;1	15;1;1;1	15;1;1;1	Elongation factor 2	EEF2	sp|P13639|EF2_HUMAN Elongation factor 2 OS=Homo sapiens OX=9606 GN=EEF2 PE=1 SV=4	4	15	15	15	4	8	3	1	1	0	2	0	0	0	0	1	2	3	3	1	2	1	1	1	0	4	8	3	1	1	0	2	0	0	0	0	1	2	3	3	1	2
P14550;V9GYG2;V9GYP9;Q5T621	P14550;V9GYG2;V9GYP9;Q5T621	2;1;1;1	2;1;1;1	2;1;1;1	Alcohol dehydrogenase [NADP(+)]	AKR1A1	sp|P14550|AK1A1_HUMAN Aldo-keto reductase family 1 member A1 OS=Homo sapiens OX=9606 GN=AKR1A1 PE=1 SV=3;tr|V9GYG2|V9GYG2_HUMAN Aldo-keto reductase family 1 member A1 OS=Homo sapiens OX=9606 GN=AKR1A1 PE=1 SV=1;tr|V9GYP9|V9GYP9_HUMAN Aldo-keto reductase fa	4	2	2	2	1	0	0	0	0	0	0	0	0	0	0	1	1	1	1	0	0	0	1	0	0	1	0	0	0	0	0	0	0	0	0	0	1	1	1	1	0	0
P14618;B4DNK4;H3BTN5;H3BQ34;H3BT25;H3BUW1;H3BTJ2;H3BU13;H3BN34;H3BQZ3;H3BR70	P14618;B4DNK4;H3BTN5;H3BQ34	7;6;5;4;3;3;3;2;1;1;1	7;6;5;4;3;3;3;2;1;1;1	7;6;5;4;3;3;3;2;1;1;1	Pyruvate kinase PKM;Pyruvate kinase	PKM	sp|P14618|KPYM_HUMAN Pyruvate kinase PKM OS=Homo sapiens OX=9606 GN=PKM PE=1 SV=4;tr|B4DNK4|B4DNK4_HUMAN Pyruvate kinase OS=Homo sapiens OX=9606 GN=PKM PE=1 SV=1;tr|H3BTN5|H3BTN5_HUMAN Pyruvate kinase (Fragment) OS=Homo sapiens OX=9606 GN=PKM PE=1 SV=1;tr|	11	7	7	7	4	3	1	1	1	0	1	0	0	2	0	3	1	1	2	2	0	1	1	1	0	4	3	1	1	1	0	1	0	0	2	0	3	1	1	2	2	0
P14635	P14635	1	1	1	G2/mitotic-specific cyclin-B1	CCNB1	sp|P14635|CCNB1_HUMAN G2/mitotic-specific cyclin-B1 OS=Homo sapiens OX=9606 GN=CCNB1 PE=1 SV=1	1	1	1	1	1	0	0	0	0	0	0	0	0	0	0	0	0	0	0	0	0	0	0	0	0	1	0	0	0	0	0	0	0	0	0	0	0	0	0	0	0	0
P14923;C9JTX4;C9J826;C9JK18;C9JKY1	P14923;C9JTX4;C9J826;C9JK18;C9JKY1	6;3;3;3;3	6;3;3;3;3	6;3;3;3;3	Junction plakoglobin	JUP	sp|P14923|PLAK_HUMAN Junction plakoglobin OS=Homo sapiens OX=9606 GN=JUP PE=1 SV=3;tr|C9JTX4|C9JTX4_HUMAN Junction plakoglobin (Fragment) OS=Homo sapiens OX=9606 GN=JUP PE=1 SV=1;tr|C9J826|C9J826_HUMAN Junction plakoglobin (Fragment) OS=Homo sapiens OX=960	5	6	6	6	0	0	0	0	0	0	1	0	0	0	0	2	2	3	1	3	1	2	1	1	0	0	0	0	0	0	0	1	0	0	0	0	2	2	3	1	3	1
P15924	P15924	12	12	12	Desmoplakin	DSP	sp|P15924|DESP_HUMAN Desmoplakin OS=Homo sapiens OX=9606 GN=DSP PE=1 SV=3	1	12	12	12	0	0	0	0	0	0	0	0	0	0	0	3	3	2	0	6	1	2	0	0	0	0	0	0	0	0	0	0	0	0	0	0	3	3	2	0	6	1
P17066;P48741	P17066;P48741	12;7	2;2	2;2	Heat shock 70 kDa protein 6;Putative heat shock 70 kDa protein 7	HSPA6;HSPA7	sp|P17066|HSP76_HUMAN Heat shock 70 kDa protein 6 OS=Homo sapiens OX=9606 GN=HSPA6 PE=1 SV=2;sp|P48741|HSP77_HUMAN Putative heat shock 70 kDa protein 7 OS=Homo sapiens OX=9606 GN=HSPA7 PE=5 SV=2	2	12	2	2	6	5	8	3	5	4	4	0	1	5	5	6	6	6	7	6	7	6	7	8	7	1	1	2	1	0	1	0	0	0	1	1	1	1	1	1	1	1
P17302	P17302	7	7	7	Gap junction alpha-1 protein	GJA1	sp|P17302|CXA1_HUMAN Gap junction alpha-1 protein OS=Homo sapiens OX=9606 GN=GJA1 PE=1 SV=2	1	7	7	7	2	1	2	0	0	0	0	0	0	3	1	2	0	0	0	0	0	0	0	0	0	2	1	2	0	0	0	0	0	0	3	1	2	0	0	0	0	0
P18206	P18206	4	4	4	Vinculin	VCL	sp|P18206|VINC_HUMAN Vinculin OS=Homo sapiens OX=9606 GN=VCL PE=1 SV=4	1	4	4	4	1	2	0	1	1	0	1	0	0	0	0	0	1	0	0	0	1	0	0	0	0	1	2	0	1	1	0	1	0	0	0	0	0	1	0	0	0	1
P18669;P15259;Q8N0Y7	P18669;P15259;Q8N0Y7	3;2;2	3;2;2	3;2;2	Phosphoglycerate mutase 1;Phosphoglycerate mutase 2;Probable phosphoglycerate mutase 4	PGAM1;PGAM2;PGAM4	sp|P18669|PGAM1_HUMAN Phosphoglycerate mutase 1 OS=Homo sapiens OX=9606 GN=PGAM1 PE=1 SV=2;sp|P15259|PGAM2_HUMAN Phosphoglycerate mutase 2 OS=Homo sapiens OX=9606 GN=PGAM2 PE=1 SV=3;sp|Q8N0Y7|PGAM4_HUMAN Probable phosphoglycerate mutase 4 OS=Homo sapiens O	3	3	3	3	3	1	0	1	1	0	1	0	0	0	0	0	0	0	0	0	0	0	0	0	0	3	1	0	1	1	0	1	0	0	0	0	0	0	0	0	0	0
P20073	P20073	3	3	3	Annexin A7	ANXA7	sp|P20073|ANXA7_HUMAN Annexin A7 OS=Homo sapiens OX=9606 GN=ANXA7 PE=1 SV=3	1	3	3	3	3	0	0	0	1	1	1	0	0	0	0	2	0	1	0	1	0	1	1	1	0	3	0	0	0	1	1	1	0	0	0	0	2	0	1	0	1	0
P22314;Q5JRR6	P22314;Q5JRR6	2;1	2;1	2;1	Ubiquitin-like modifier-activating enzyme 1	UBA1	sp|P22314|UBA1_HUMAN Ubiquitin-like modifier-activating enzyme 1 OS=Homo sapiens OX=9606 GN=UBA1 PE=1 SV=3;tr|Q5JRR6|Q5JRR6_HUMAN Ubiquitin-like modifier-activating enzyme 1 OS=Homo sapiens OX=9606 GN=UBA1 PE=1 SV=1	2	2	2	2	2	1	0	0	0	0	0	0	0	0	0	0	0	0	0	0	0	0	0	0	0	2	1	0	0	0	0	0	0	0	0	0	0	0	0	0	0	0
P23229;C9JXX7	P23229	3;1	3;1	3;1	Integrin alpha-6;Integrin alpha-6 heavy chain;Integrin alpha-6 light chain;Processed integrin alpha-6	ITGA6	sp|P23229|ITA6_HUMAN Integrin alpha-6 OS=Homo sapiens OX=9606 GN=ITGA6 PE=1 SV=5	2	3	3	3	2	2	1	1	1	0	0	0	0	0	0	0	0	1	1	1	1	1	1	1	0	2	2	1	1	1	0	0	0	0	0	0	0	0	1	1	1	1
P23284	P23284	1	1	1	Peptidyl-prolyl cis-trans isomerase B	PPIB	sp|P23284|PPIB_HUMAN Peptidyl-prolyl cis-trans isomerase B OS=Homo sapiens OX=9606 GN=PPIB PE=1 SV=2	1	1	1	1	0	0	0	0	0	0	0	0	0	0	0	0	0	1	1	1	0	0	0	0	0	0	0	0	0	0	0	0	0	0	0	0	0	0	1	1	1	0
P23526	P23526	3	3	3	Adenosylhomocysteinase	AHCY	sp|P23526|SAHH_HUMAN Adenosylhomocysteinase OS=Homo sapiens OX=9606 GN=AHCY PE=1 SV=4	1	3	3	3	0	0	0	0	0	0	1	0	0	0	0	2	0	0	0	0	0	0	0	0	0	0	0	0	0	0	0	1	0	0	0	0	2	0	0	0	0	0
P26038;V9GZ54	P26038	10;3	10;3	6;2	Moesin	MSN	sp|P26038|MOES_HUMAN Moesin OS=Homo sapiens OX=9606 GN=MSN PE=1 SV=3	2	10	10	6	3	6	1	1	2	2	1	0	0	1	2	4	1	2	2	2	2	1	2	1	1	3	6	1	1	2	2	1	0	0	1	2	4	1	2	2	2	2
P26196;Q8IV96	P26196	3;1	3;1	3;1	Probable ATP-dependent RNA helicase DDX6	DDX6	sp|P26196|DDX6_HUMAN Probable ATP-dependent RNA helicase DDX6 OS=Homo sapiens OX=9606 GN=DDX6 PE=1 SV=2	2	3	3	3	0	0	0	0	0	0	0	0	0	0	0	0	0	1	1	1	1	1	1	1	0	0	0	0	0	0	0	0	0	0	0	0	0	0	1	1	1	1
P26373;J3QSB4;H3BTH3	P26373;J3QSB4	5;4;1	5;4;1	5;4;1	60S ribosomal protein L13	RPL13	sp|P26373|RL13_HUMAN 60S ribosomal protein L13 OS=Homo sapiens OX=9606 GN=RPL13 PE=1 SV=4;tr|J3QSB4|J3QSB4_HUMAN 60S ribosomal protein L13 (Fragment) OS=Homo sapiens OX=9606 GN=RPL13 PE=1 SV=1	3	5	5	5	0	0	0	0	0	0	1	0	0	3	1	2	0	0	0	0	0	0	0	0	0	0	0	0	0	0	0	1	0	0	3	1	2	0	0	0	0	0
P26641	P26641	2	2	2	Elongation factor 1-gamma	EEF1G	sp|P26641|EF1G_HUMAN Elongation factor 1-gamma OS=Homo sapiens OX=9606 GN=EEF1G PE=1 SV=3	1	2	2	2	0	0	1	1	1	1	0	0	0	0	0	1	0	0	0	0	0	0	0	0	0	0	0	1	1	1	1	0	0	0	0	0	1	0	0	0	0	0
P27105;F8VSL7	P27105;F8VSL7	7;4	7;4	7;4	Erythrocyte band 7 integral membrane protein	STOM	sp|P27105|STOM_HUMAN Erythrocyte band 7 integral membrane protein OS=Homo sapiens OX=9606 GN=STOM PE=1 SV=3;tr|F8VSL7|F8VSL7_HUMAN Erythrocyte band 7 integral membrane protein OS=Homo sapiens OX=9606 GN=STOM PE=1 SV=1	2	7	7	7	0	3	0	1	2	1	3	0	0	0	0	1	2	3	3	1	3	2	0	1	1	0	3	0	1	2	1	3	0	0	0	0	1	2	3	3	1	3
P27348;E9PG15	P27348;E9PG15	4;3	2;2	2;2	14-3-3 protein theta	YWHAQ	sp|P27348|1433T_HUMAN 14-3-3 protein theta OS=Homo sapiens OX=9606 GN=YWHAQ PE=1 SV=1;tr|E9PG15|E9PG15_HUMAN 14-3-3 protein theta (Fragment) OS=Homo sapiens OX=9606 GN=YWHAQ PE=1 SV=1	2	4	2	2	2	0	0	0	0	0	0	0	0	0	0	2	1	1	2	2	2	0	1	1	0	2	0	0	0	0	0	0	0	0	0	0	1	0	1	1	1	1
P29966	P29966	4	4	4	Myristoylated alanine-rich C-kinase substrate	MARCKS	sp|P29966|MARCS_HUMAN Myristoylated alanine-rich C-kinase substrate OS=Homo sapiens OX=9606 GN=MARCKS PE=1 SV=4	1	4	4	4	0	1	0	1	0	0	0	0	0	0	0	3	0	1	2	1	1	1	1	1	0	0	1	0	1	0	0	0	0	0	0	0	3	0	1	2	1	1
P30041	P30041	1	1	1	Peroxiredoxin-6	PRDX6	sp|P30041|PRDX6_HUMAN Peroxiredoxin-6 OS=Homo sapiens OX=9606 GN=PRDX6 PE=1 SV=3	1	1	1	1	0	0	0	1	1	0	0	0	0	0	0	0	0	0	0	0	0	0	0	0	0	0	0	0	1	1	0	0	0	0	0	0	0	0	0	0	0	0
P30086	P30086	2	2	2	Phosphatidylethanolamine-binding protein 1;Hippocampal cholinergic neurostimulating peptide	PEBP1	sp|P30086|PEBP1_HUMAN Phosphatidylethanolamine-binding protein 1 OS=Homo sapiens OX=9606 GN=PEBP1 PE=1 SV=3	1	2	2	2	0	0	0	0	0	0	0	0	0	0	0	0	1	1	1	0	0	0	0	1	0	0	0	0	0	0	0	0	0	0	0	0	0	1	1	1	0	0
P30825;Q5JR49;A0A1W2PR06;P52569	P30825	4;1;1;1	4;1;1;1	4;1;1;1	High affinity cationic amino acid transporter 1	SLC7A1	sp|P30825|SL7A1_HUMAN High affinity cationic amino acid transporter 1 OS=Homo sapiens OX=9606 GN=SLC7A1 PE=1 SV=1	4	4	4	4	0	0	0	0	0	0	0	0	0	0	0	0	0	0	2	1	2	0	1	0	0	0	0	0	0	0	0	0	0	0	0	0	0	0	0	2	1	2
P31689	P31689	12	12	12	DnaJ homolog subfamily A member 1	DNAJA1	sp|P31689|DNJA1_HUMAN DnaJ homolog subfamily A member 1 OS=Homo sapiens OX=9606 GN=DNAJA1 PE=1 SV=2	1	12	12	12	6	2	3	2	3	1	1	0	0	1	0	1	5	6	4	4	6	5	2	4	2	6	2	3	2	3	1	1	0	0	1	0	1	5	6	4	4	6
P31948;H0YGI8	P31948;H0YGI8	2;1	2;1	2;1	Stress-induced-phosphoprotein 1	STIP1	sp|P31948|STIP1_HUMAN Stress-induced-phosphoprotein 1 OS=Homo sapiens OX=9606 GN=STIP1 PE=1 SV=1;tr|H0YGI8|H0YGI8_HUMAN Stress-induced-phosphoprotein 1 (Fragment) OS=Homo sapiens OX=9606 GN=STIP1 PE=1 SV=1	2	2	2	2	1	1	0	1	0	0	0	0	0	0	0	0	1	1	1	1	0	0	0	0	0	1	1	0	1	0	0	0	0	0	0	0	0	1	1	1	1	0
P32119;A6NIW5	P32119;A6NIW5	2;1	2;1	1;1	Peroxiredoxin-2	PRDX2	sp|P32119|PRDX2_HUMAN Peroxiredoxin-2 OS=Homo sapiens OX=9606 GN=PRDX2 PE=1 SV=5;tr|A6NIW5|A6NIW5_HUMAN Peroxiredoxin 2, isoform CRA_a OS=Homo sapiens OX=9606 GN=PRDX2 PE=1 SV=2	2	2	2	1	0	1	0	1	0	1	1	0	1	1	1	1	1	1	0	1	0	1	0	1	1	0	1	0	1	0	1	1	0	1	1	1	1	1	1	0	1	0
P35326;P35325;P22532;P22531;Q9BYE4	P35326;P35325;P22532;P22531;Q9BYE4	1;1;1;1;1	1;1;1;1;1	1;1;1;1;1	Small proline-rich protein 2A;Small proline-rich protein 2B;Small proline-rich protein 2D;Small proline-rich protein 2E;Small proline-rich protein 2G	SPRR2A;SPRR2B;SPRR2D;SPRR2E;SPRR2G	sp|P35326|SPR2A_HUMAN Small proline-rich protein 2A OS=Homo sapiens OX=9606 GN=SPRR2A PE=1 SV=1;sp|P35325|SPR2B_HUMAN Small proline-rich protein 2B OS=Homo sapiens OX=9606 GN=SPRR2B PE=2 SV=1;sp|P22532|SPR2D_HUMAN Small proline-rich protein 2D OS=Homo sapi	5	1	1	1	0	0	0	0	0	0	0	0	0	0	0	0	0	0	0	1	0	0	0	0	0	0	0	0	0	0	0	0	0	0	0	0	0	0	0	0	1	0
P35527;CON__P35527;K7EQQ3	P35527;CON__P35527;K7EQQ3	40;39;23	40;39;23	39;38;23	Keratin, type I cytoskeletal 9	KRT9	sp|P35527|K1C9_HUMAN Keratin, type I cytoskeletal 9 OS=Homo sapiens OX=9606 GN=KRT9 PE=1 SV=3;;tr|K7EQQ3|K7EQQ3_HUMAN Keratin, type I cytoskeletal 9 OS=Homo sapiens OX=9606 GN=KRT9 PE=1 SV=1	3	40	40	39	17	11	11	5	8	6	6	4	3	10	10	16	24	26	25	23	23	25	14	14	16	17	11	11	5	8	6	6	4	3	10	10	16	24	26	25	23	23
P35579;P35749;B1AH99;Q5BKV1;A0A2R8Y4C3;A0A0C4DFM8;A0A494C024;P35580	P35579	12;2;1;1;1;1;1;1	12;2;1;1;1;1;1;1	10;0;1;1;0;0;0;1	Myosin-9	MYH9	sp|P35579|MYH9_HUMAN Myosin-9 OS=Homo sapiens OX=9606 GN=MYH9 PE=1 SV=4	8	12	12	10	1	2	0	0	0	0	3	0	0	0	0	4	5	4	4	3	1	0	1	0	0	1	2	0	0	0	0	3	0	0	0	0	4	5	4	4	3	1
P35613;A0A087WUV8;A0A087X2B5;I3L192;R4GMX5;R4GN83;A0A2R8YDZ0	P35613;A0A087WUV8;A0A087X2B5;I3L192	7;6;6;4;3;2;1	7;6;6;4;3;2;1	7;6;6;4;3;2;1	Basigin	BSG	sp|P35613|BASI_HUMAN Basigin OS=Homo sapiens OX=9606 GN=BSG PE=1 SV=2;tr|A0A087WUV8|A0A087WUV8_HUMAN Basigin OS=Homo sapiens OX=9606 GN=BSG PE=1 SV=1;tr|A0A087X2B5|A0A087X2B5_HUMAN Basigin (Fragment) OS=Homo sapiens OX=9606 GN=BSG PE=1 SV=1;tr|I3L192|I3L19	7	7	7	7	4	4	5	4	3	3	2	1	0	1	2	4	5	6	7	6	6	5	7	6	5	4	4	5	4	3	3	2	1	0	1	2	4	5	6	7	6	6
P36578;H3BU31;H3BM89;H3BTP7	P36578;H3BU31;H3BM89	9;5;5;4	9;5;5;4	9;5;5;4	60S ribosomal protein L4	RPL4	sp|P36578|RL4_HUMAN 60S ribosomal protein L4 OS=Homo sapiens OX=9606 GN=RPL4 PE=1 SV=5;tr|H3BU31|H3BU31_HUMAN 60S ribosomal protein L4 (Fragment) OS=Homo sapiens OX=9606 GN=RPL4 PE=1 SV=1;tr|H3BM89|H3BM89_HUMAN 60S ribosomal protein L4 OS=Homo sapiens OX=9	4	9	9	9	2	1	1	1	0	1	2	2	1	2	1	5	0	0	0	0	0	0	0	0	0	2	1	1	1	0	1	2	2	1	2	1	5	0	0	0	0	0
P37108;H0YLA2	P37108;H0YLA2	3;2	3;2	3;2	Signal recognition particle 14 kDa protein	2014-08-01	sp|P37108|SRP14_HUMAN Signal recognition particle 14 kDa protein OS=Homo sapiens OX=9606 GN=SRP14 PE=1 SV=2;tr|H0YLA2|H0YLA2_HUMAN Signal recognition particle 14 kDa protein OS=Homo sapiens OX=9606 GN=SRP14 PE=1 SV=1	2	3	3	3	1	1	1	0	0	0	1	0	0	0	0	0	1	1	1	1	1	0	0	0	0	1	1	1	0	0	0	1	0	0	0	0	0	1	1	1	1	1
P39023;B5MCW2;H7C422;G5E9G0;F8WCR1;H7C3M2;Q92901	P39023;B5MCW2;H7C422;G5E9G0	3;2;2;2;1;1;1	3;2;2;2;1;1;1	3;2;2;2;1;1;1	60S ribosomal protein L3	RPL3	sp|P39023|RL3_HUMAN 60S ribosomal protein L3 OS=Homo sapiens OX=9606 GN=RPL3 PE=1 SV=2;tr|B5MCW2|B5MCW2_HUMAN 60S ribosomal protein L3 (Fragment) OS=Homo sapiens OX=9606 GN=RPL3 PE=1 SV=1;tr|H7C422|H7C422_HUMAN 60S ribosomal protein L3 (Fragment) OS=Homo s	7	3	3	3	1	1	0	0	0	0	2	0	0	0	2	1	0	0	0	0	0	0	0	0	0	1	1	0	0	0	0	2	0	0	0	2	1	0	0	0	0	0
P40222;Q8N3L3	P40222	25;1	25;1	24;0	Alpha-taxilin	TXLNA	sp|P40222|TXLNA_HUMAN Alpha-taxilin OS=Homo sapiens OX=9606 GN=TXLNA PE=1 SV=3	2	25	25	24	7	3	3	5	3	1	4	1	1	0	0	0	7	13	12	12	10	8	9	6	4	7	3	3	5	3	1	4	1	1	0	0	0	7	13	12	12	10
P42566;B1AUU8;S4R3U1	P42566;B1AUU8	33;28;4	33;28;4	33;28;4	Epidermal growth factor receptor substrate 15	EPS15	sp|P42566|EPS15_HUMAN Epidermal growth factor receptor substrate 15 OS=Homo sapiens OX=9606 GN=EPS15 PE=1 SV=2;tr|B1AUU8|B1AUU8_HUMAN Epidermal growth factor receptor substrate 15 OS=Homo sapiens OX=9606 GN=EPS15 PE=1 SV=1	3	33	33	33	11	8	7	5	6	3	3	0	0	0	0	0	19	21	23	17	18	11	14	15	12	11	8	7	5	6	3	3	0	0	0	0	0	19	21	23	17	18
P43121	P43121	1	1	1	Cell surface glycoprotein MUC18	MCAM	sp|P43121|MUC18_HUMAN Cell surface glycoprotein MUC18 OS=Homo sapiens OX=9606 GN=MCAM PE=1 SV=2	1	1	1	1	0	0	0	0	0	0	0	0	0	0	0	0	0	0	1	0	0	0	0	0	0	0	0	0	0	0	0	0	0	0	0	0	0	0	0	1	0	0
P46109	P46109	2	2	2	Crk-like protein	CRKL	sp|P46109|CRKL_HUMAN Crk-like protein OS=Homo sapiens OX=9606 GN=CRKL PE=1 SV=1	1	2	2	2	1	0	0	0	0	0	0	0	0	0	0	0	0	1	0	0	0	0	0	0	0	1	0	0	0	0	0	0	0	0	0	0	0	0	1	0	0	0
P47929	P47929	3	3	3	Galectin-7	LGALS7	sp|P47929|LEG7_HUMAN Galectin-7 OS=Homo sapiens OX=9606 GN=LGALS7 PE=1 SV=2	1	3	3	3	0	0	0	0	0	0	0	0	0	0	0	0	0	0	0	3	0	0	2	0	0	0	0	0	0	0	0	0	0	0	0	0	0	0	0	0	3	0
P48730;H7BYT1;J3KRM8;B4DLF1	P48730;H7BYT1	13;12;1;1	4;3;1;1	4;3;1;1	Casein kinase I isoform delta	CSNK1D	sp|P48730|KC1D_HUMAN Casein kinase I isoform delta OS=Homo sapiens OX=9606 GN=CSNK1D PE=1 SV=2;tr|H7BYT1|H7BYT1_HUMAN Casein kinase I isoform delta OS=Homo sapiens OX=9606 GN=CSNK1D PE=1 SV=2	4	13	4	4	3	1	0	0	2	0	0	0	0	0	0	0	5	8	8	6	3	5	2	3	3	2	1	0	0	1	0	0	0	0	0	0	0	1	2	3	2	0
P49006	P49006	3	3	3	MARCKS-related protein	MARCKSL1	sp|P49006|MRP_HUMAN MARCKS-related protein OS=Homo sapiens OX=9606 GN=MARCKSL1 PE=1 SV=2	1	3	3	3	3	1	2	3	0	1	0	0	0	0	0	1	0	0	0	0	0	0	0	0	0	3	1	2	3	0	1	0	0	0	0	0	1	0	0	0	0	0
P49189	P49189	1	1	1	4-trimethylaminobutyraldehyde dehydrogenase	ALDH9A1	sp|P49189|AL9A1_HUMAN 4-trimethylaminobutyraldehyde dehydrogenase OS=Homo sapiens OX=9606 GN=ALDH9A1 PE=1 SV=3	1	1	1	1	0	0	0	1	1	1	1	0	0	0	0	0	0	0	0	0	0	0	0	0	0	0	0	0	1	1	1	1	0	0	0	0	0	0	0	0	0	0
P49674;H0Y645;B0QY35;B0QY34;A0A669KBC0;H0Y682;H0Y5S9;J3QQI9;B0QY36;H0Y2N6	P49674;H0Y645;B0QY35;B0QY34;A0A669KBC0	15;10;10;10;10;6;5;5;5;4	15;10;10;10;10;6;5;5;5;4	6;1;1;1;1;5;5;0;0;0	Casein kinase I isoform epsilon	CSNK1E	sp|P49674|KC1E_HUMAN Casein kinase I isoform epsilon OS=Homo sapiens OX=9606 GN=CSNK1E PE=1 SV=1;tr|H0Y645|H0Y645_HUMAN Casein kinase I isoform epsilon (Fragment) OS=Homo sapiens OX=9606 GN=CSNK1E PE=1 SV=1;tr|B0QY35|B0QY35_HUMAN Casein kinase I isoform ep	10	15	15	6	6	5	1	3	5	1	1	1	0	0	0	0	6	9	6	5	4	6	4	3	3	6	5	1	3	5	1	1	1	0	0	0	0	6	9	6	5	4
P49840;A8MT37;M0QYV0	P49840;A8MT37	19;16;7	14;11;6	14;11;6	Glycogen synthase kinase-3 alpha	GSK3A	sp|P49840|GSK3A_HUMAN Glycogen synthase kinase-3 alpha OS=Homo sapiens OX=9606 GN=GSK3A PE=1 SV=2;tr|A8MT37|A8MT37_HUMAN [Tau protein] kinase OS=Homo sapiens OX=9606 GN=GSK3A PE=1 SV=2	3	19	14	14	8	4	3	0	4	2	0	0	0	0	0	0	8	10	14	7	8	9	7	5	2	6	4	3	0	4	2	0	0	0	0	0	0	6	8	11	4	5
P49841;A0A3B3ITW1	P49841;A0A3B3ITW1	19;17	19;17	14;12	Glycogen synthase kinase-3 beta	GSK3B	sp|P49841|GSK3B_HUMAN Glycogen synthase kinase-3 beta OS=Homo sapiens OX=9606 GN=GSK3B PE=1 SV=2;tr|A0A3B3ITW1|A0A3B3ITW1_HUMAN Glycogen synthase kinase-3 beta OS=Homo sapiens OX=9606 GN=GSK3B PE=1 SV=1	2	19	19	14	6	6	3	3	2	2	1	0	0	0	0	0	9	11	15	10	11	9	8	4	5	6	6	3	3	2	2	1	0	0	0	0	0	9	11	15	10	11
P50395;Q5SX91;Q5SX87;P31150	P50395;Q5SX91;Q5SX87	4;2;2;1	4;2;2;1	4;2;2;1	Rab GDP dissociation inhibitor beta	GDI2	sp|P50395|GDIB_HUMAN Rab GDP dissociation inhibitor beta OS=Homo sapiens OX=9606 GN=GDI2 PE=1 SV=2;tr|Q5SX91|Q5SX91_HUMAN Rab GDP dissociation inhibitor (Fragment) OS=Homo sapiens OX=9606 GN=GDI2 PE=1 SV=1;tr|Q5SX87|Q5SX87_HUMAN Rab GDP dissociation inhibi	4	4	4	4	0	1	0	1	0	0	0	0	0	0	0	0	0	0	0	0	0	1	1	2	0	0	1	0	1	0	0	0	0	0	0	0	0	0	0	0	0	0
P50570;K7EMQ3;K7EPK9;A0A1B0GUX5;A0A1B0GU67;A0A0D9SFB1;A0A0U1RQP1;A0A0D9SFE4;Q05193	P50570	8;2;1;1;1;1;1;1;1	8;2;1;1;1;1;1;1;1	6;2;0;1;1;1;1;1;1	Dynamin-2	DNM2	sp|P50570|DYN2_HUMAN Dynamin-2 OS=Homo sapiens OX=9606 GN=DNM2 PE=1 SV=2	9	8	8	6	1	2	0	2	1	0	1	1	0	0	0	0	3	4	4	2	0	0	2	1	1	1	2	0	2	1	0	1	1	0	0	0	0	3	4	4	2	0
P50995;H0Y6E1	P50995	9;3	9;3	9;3	Annexin A11	ANXA11	sp|P50995|ANX11_HUMAN Annexin A11 OS=Homo sapiens OX=9606 GN=ANXA11 PE=1 SV=1	2	9	9	9	3	3	1	1	1	0	0	0	0	2	2	3	2	4	4	1	1	0	2	2	0	3	3	1	1	1	0	0	0	0	2	2	3	2	4	4	1	1
P51148;K7ERI8;K7ERQ8;F8VVK3;K7ENY4;K7EIP6;F8WCY6;F8WD79;F8VPW9;F8VSF8;F8VWZ7;F8VWU4;F8VVZ0;F8VUA5;P61020;P20339	P51148;K7ERI8;K7ERQ8	6;3;3;2;2;1;1;1;1;1;1;1;1;1;1;1	6;3;3;2;2;1;1;1;1;1;1;1;1;1;1;1	6;3;3;2;2;1;1;1;1;1;1;1;1;1;1;1	Ras-related protein Rab-5C	RAB5C	sp|P51148|RAB5C_HUMAN Ras-related protein Rab-5C OS=Homo sapiens OX=9606 GN=RAB5C PE=1 SV=2;tr|K7ERI8|K7ERI8_HUMAN Uncharacterized protein OS=Homo sapiens OX=9606 PE=4 SV=1;tr|K7ERQ8|K7ERQ8_HUMAN PCAF_N domain-containing protein (Fragment) OS=Homo sapiens	16	6	6	6	1	4	1	0	0	0	0	0	0	0	0	1	2	3	3	2	2	1	2	2	1	1	4	1	0	0	0	0	0	0	0	0	1	2	3	3	2	2
P51149;C9J592;C9J8S3;C9IZZ0;C9J4V0;C9J4S4;C9J7D1	P51149;C9J592;C9J8S3;C9IZZ0	8;6;5;4;3;2;1	8;6;5;4;3;2;1	8;6;5;4;3;2;1	Ras-related protein Rab-7a	RAB7A	sp|P51149|RAB7A_HUMAN Ras-related protein Rab-7a OS=Homo sapiens OX=9606 GN=RAB7A PE=1 SV=1;tr|C9J592|C9J592_HUMAN Ras-related protein Rab-7a (Fragment) OS=Homo sapiens OX=9606 GN=RAB7A PE=1 SV=1;tr|C9J8S3|C9J8S3_HUMAN Ras-related protein Rab-7a OS=Homo sa	7	8	8	8	1	1	0	1	1	0	0	0	0	0	1	1	6	6	7	6	4	5	4	5	5	1	1	0	1	1	0	0	0	0	0	1	1	6	6	7	6	4
P51153;A0A087WWB9	P51153	7;3	7;3	5;3	Ras-related protein Rab-13	RAB13	sp|P51153|RAB13_HUMAN Ras-related protein Rab-13 OS=Homo sapiens OX=9606 GN=RAB13 PE=1 SV=1	2	7	7	5	2	2	0	2	1	0	1	0	0	1	0	1	3	5	4	3	3	2	2	2	2	2	2	0	2	1	0	1	0	0	1	0	1	3	5	4	3	3
P52292;J3QLL0;J3KS65	P52292	4;1;1	4;1;1	4;1;1	Importin subunit alpha-1	KPNA2	sp|P52292|IMA1_HUMAN Importin subunit alpha-1 OS=Homo sapiens OX=9606 GN=KPNA2 PE=1 SV=1	3	4	4	4	2	2	0	0	0	0	0	0	0	0	0	0	1	3	3	1	1	1	0	0	0	2	2	0	0	0	0	0	0	0	0	0	0	1	3	3	1	1
P52907;C9JUG7;F8W9N7;A0A0D9SET8;P47755	P52907	5;1;1;1;1	5;1;1;1;1	5;1;1;1;1	F-actin-capping protein subunit alpha-1	CAPZA1	sp|P52907|CAZA1_HUMAN F-actin-capping protein subunit alpha-1 OS=Homo sapiens OX=9606 GN=CAPZA1 PE=1 SV=3	5	5	5	5	2	2	0	1	0	0	0	0	0	0	0	0	0	1	2	0	1	1	0	0	0	2	2	0	1	0	0	0	0	0	0	0	0	0	1	2	0	1
P53350;I3L2H5;I3L387;I3L309	P53350	18;4;4;1	18;4;4;1	18;4;4;1	Serine/threonine-protein kinase PLK1	PLK1	sp|P53350|PLK1_HUMAN Serine/threonine-protein kinase PLK1 OS=Homo sapiens OX=9606 GN=PLK1 PE=1 SV=1	4	18	18	18	7	7	3	2	4	1	3	1	0	0	0	0	7	7	11	7	9	5	6	6	6	7	7	3	2	4	1	3	1	0	0	0	0	7	7	11	7	9
P53985;Q5T8R3;Q5T8R5	P53985;Q5T8R3;Q5T8R5	6;4;4	6;4;4	6;4;4	Monocarboxylate transporter 1	SLC16A1	sp|P53985|MOT1_HUMAN Monocarboxylate transporter 1 OS=Homo sapiens OX=9606 GN=SLC16A1 PE=1 SV=3;tr|Q5T8R3|Q5T8R3_HUMAN Monocarboxylate transporter 1 (Fragment) OS=Homo sapiens OX=9606 GN=SLC16A1 PE=1 SV=1;tr|Q5T8R5|Q5T8R5_HUMAN Monocarboxylate transporter	3	6	6	6	1	1	1	1	3	2	3	0	1	1	1	0	2	4	3	2	2	2	2	2	1	1	1	1	1	3	2	3	0	1	1	1	0	2	4	3	2	2
P54289;E7ERK3;H0Y715	P54289;E7ERK3	4;3;1	4;3;1	4;3;1	Voltage-dependent calcium channel subunit alpha-2/delta-1;Voltage-dependent calcium channel subunit alpha-2-1;Voltage-dependent calcium channel subunit delta-1	CACNA2D1	sp|P54289|CA2D1_HUMAN Voltage-dependent calcium channel subunit alpha-2/delta-1 OS=Homo sapiens OX=9606 GN=CACNA2D1 PE=1 SV=3;tr|E7ERK3|E7ERK3_HUMAN Voltage-dependent calcium channel subunit alpha-2/delta-1 OS=Homo sapiens OX=9606 GN=CACNA2D1 PE=1 SV=1	3	4	4	4	1	2	0	0	0	0	0	0	0	0	0	0	0	0	1	0	1	0	0	0	0	1	2	0	0	0	0	0	0	0	0	0	0	0	0	1	0	1
P54709;H7C547;F8WBY4;C9JXZ1;C9JA36	P54709;H7C547;F8WBY4;C9JXZ1;C9JA36	4;2;2;2;2	4;2;2;2;2	4;2;2;2;2	Sodium/potassium-transporting ATPase subunit beta-3	ATP1B3	sp|P54709|AT1B3_HUMAN Sodium/potassium-transporting ATPase subunit beta-3 OS=Homo sapiens OX=9606 GN=ATP1B3 PE=1 SV=1;tr|H7C547|H7C547_HUMAN Sodium/potassium-transporting ATPase subunit beta-3 (Fragment) OS=Homo sapiens OX=9606 GN=ATP1B3 PE=1 SV=1;tr|F8WBY	5	4	4	4	1	1	1	1	1	1	1	0	0	0	1	1	2	2	3	2	2	1	2	1	1	1	1	1	1	1	1	1	0	0	0	1	1	2	2	3	2	2
P55072;C9JUP7;C9IZA5	P55072	21;2;2	21;2;2	21;2;2	Transitional endoplasmic reticulum ATPase	VCP	sp|P55072|TERA_HUMAN Transitional endoplasmic reticulum ATPase OS=Homo sapiens OX=9606 GN=VCP PE=1 SV=4	3	21	21	21	5	12	4	1	0	0	0	0	0	0	0	0	7	11	10	8	5	3	3	2	0	5	12	4	1	0	0	0	0	0	0	0	0	7	11	10	8	5
P60174;U3KQF3;U3KPZ0	P60174	3;1;1	3;1;1	3;1;1	Triosephosphate isomerase	TPI1	sp|P60174|TPIS_HUMAN Triosephosphate isomerase OS=Homo sapiens OX=9606 GN=TPI1 PE=1 SV=3	3	3	3	3	2	2	1	1	2	0	0	0	0	0	0	1	1	2	0	0	0	0	1	1	0	2	2	1	1	2	0	0	0	0	0	0	1	1	2	0	0	0
P60709;A0A2R8Y793;G5E9R0;E7EVS6;A0A2R8YGF8;C9JUM1;C9JZR7;C9JTX5;A0A2R8YEA7;Q9BYX7;F8WCH0;A0A2R8YFE2	P60709;A0A2R8Y793;G5E9R0;E7EVS6;A0A2R8YGF8	24;22;12;12;12;10;10;9;7;4;3;2	1;1;1;1;1;1;1;1;0;0;0;0	1;1;1;1;1;1;1;1;0;0;0;0	Actin, cytoplasmic 1;Actin, cytoplasmic 1, N-terminally processed	ACTB	sp|P60709|ACTB_HUMAN Actin, cytoplasmic 1 OS=Homo sapiens OX=9606 GN=ACTB PE=1 SV=1;tr|A0A2R8Y793|A0A2R8Y793_HUMAN Actin, cytoplasmic 1 (Fragment) OS=Homo sapiens OX=9606 GN=ACTB PE=1 SV=1;tr|G5E9R0|G5E9R0_HUMAN Actin, cytoplasmic 1 OS=Homo sapiens OX=9606	12	24	1	1	13	12	11	7	12	5	7	3	5	5	6	7	9	9	11	10	10	8	7	8	9	1	1	1	1	1	1	0	0	0	0	0	1	0	0	1	1	0
P60763;J3KSC4;J3QLK0;A0A3B3IRV0;F8WET9;B1AH79;A0A494C1M1;G3V4H1;A0A494BZX6;G3V476;P17081;Q9H4E5	P60763;J3KSC4;J3QLK0	6;4;4;1;1;1;1;1;1;1;1;1	1;1;1;0;0;0;0;0;0;0;0;0	1;1;1;0;0;0;0;0;0;0;0;0	Ras-related C3 botulinum toxin substrate 3	RAC3	sp|P60763|RAC3_HUMAN Ras-related C3 botulinum toxin substrate 3 OS=Homo sapiens OX=9606 GN=RAC3 PE=1 SV=1;tr|J3KSC4|J3KSC4_HUMAN Ras-related C3 botulinum toxin substrate 3 (Fragment) OS=Homo sapiens OX=9606 GN=RAC3 PE=1 SV=1;tr|J3QLK0|J3QLK0_HUMAN Ras-rela	12	6	1	1	2	4	0	2	1	0	2	1	1	1	1	2	2	2	4	4	3	2	2	3	1	0	0	0	1	0	0	0	0	0	0	0	0	0	0	1	0	0
P60842;J3QKZ9;J3QLN6;J3KS25;J3QR64;J3KTB5;J3QL43;J3QS69;J3KT12;E7EQG2;Q14240;J3KT04;J3KS93;E7EMV8;J3KSN7;J3QQP0;E9PBH4;F8WE11;I3L3H2;P38919	P60842;J3QKZ9;J3QLN6;J3KS25;J3QR64;J3KTB5;J3QL43;J3QS69;J3KT12;E7EQG2;Q14240;J3KT04;J3KS93;E7EMV8;J3KSN7	4;3;3;3;3;3;3;3;3;3;3;2;2;2;2;1;1;1;1;1	4;3;3;3;3;3;3;3;3;3;3;2;2;2;2;1;1;1;1;1	4;3;3;3;3;3;3;3;3;3;3;2;2;2;2;1;1;1;1;1	Eukaryotic initiation factor 4A-I;Eukaryotic initiation factor 4A-II;Eukaryotic initiation factor 4A-II, N-terminally processed	EIF4A1;EIF4A2	sp|P60842|IF4A1_HUMAN Eukaryotic initiation factor 4A-I OS=Homo sapiens OX=9606 GN=EIF4A1 PE=1 SV=1;tr|J3QKZ9|J3QKZ9_HUMAN RNA helicase (Fragment) OS=Homo sapiens OX=9606 GN=EIF4A1 PE=1 SV=8;tr|J3QLN6|J3QLN6_HUMAN RNA helicase (Fragment) OS=Homo sapiens OX	20	4	4	4	0	0	0	0	0	0	0	0	0	0	0	2	2	3	4	0	2	0	2	1	0	0	0	0	0	0	0	0	0	0	0	0	2	2	3	4	0	2
P60953;Q5JYX0;A0A590UJK8	P60953	7;2;2	6;1;1	6;1;1	Cell division control protein 42 homolog	CDC42	sp|P60953|CDC42_HUMAN Cell division control protein 42 homolog OS=Homo sapiens OX=9606 GN=CDC42 PE=1 SV=2	3	7	6	6	3	7	2	0	0	1	1	0	0	0	0	0	1	1	2	2	2	1	1	2	1	3	6	2	0	0	1	1	0	0	0	0	0	1	1	1	1	1
P61006	P61006	4	2	2	Ras-related protein Rab-8A	RAB8A	sp|P61006|RAB8A_HUMAN Ras-related protein Rab-8A OS=Homo sapiens OX=9606 GN=RAB8A PE=1 SV=1	1	4	2	2	3	2	1	1	1	0	1	0	0	1	0	1	2	3	2	2	2	2	1	2	2	2	1	1	0	0	0	0	0	0	0	0	0	1	1	1	1	1
P61019;E9PKL7;A0A3B3ITL1;Q8WUD1;H7C125;Q6PIK3	P61019;E9PKL7;A0A3B3ITL1;Q8WUD1	3;2;2;2;1;1	3;2;2;2;1;1	3;2;2;2;1;1	Ras-related protein Rab-2A;Ras-related protein Rab-2B	RAB2A;RAB2B	sp|P61019|RAB2A_HUMAN Ras-related protein Rab-2A OS=Homo sapiens OX=9606 GN=RAB2A PE=1 SV=1;tr|E9PKL7|E9PKL7_HUMAN Ras-related protein Rab-2A OS=Homo sapiens OX=9606 GN=RAB2A PE=1 SV=1;tr|A0A3B3ITL1|A0A3B3ITL1_HUMAN Ras-related protein Rab-2B OS=Homo sapie	6	3	3	3	0	0	0	0	0	0	0	0	0	0	0	0	1	3	3	0	1	0	0	0	0	0	0	0	0	0	0	0	0	0	0	0	0	1	3	3	0	1
P61026	P61026	5	4	4	Ras-related protein Rab-10	RAB10	sp|P61026|RAB10_HUMAN Ras-related protein Rab-10 OS=Homo sapiens OX=9606 GN=RAB10 PE=1 SV=1	1	5	4	4	2	3	1	1	1	0	1	0	0	1	0	1	3	3	4	3	2	3	1	1	1	1	2	1	0	0	0	0	0	0	0	0	0	2	2	3	2	1
P61106	P61106	1	1	1	Ras-related protein Rab-14	RAB14	sp|P61106|RAB14_HUMAN Ras-related protein Rab-14 OS=Homo sapiens OX=9606 GN=RAB14 PE=1 SV=4	1	1	1	1	1	1	0	0	0	0	0	0	0	0	0	0	0	0	0	0	0	0	0	0	0	1	1	0	0	0	0	0	0	0	0	0	0	0	0	0	0	0
P61224;E7ESV4;F5H7Y6;F5GX62;A6NIZ1;F5H823;B7ZB78;F5GZG1;F5H6R7;F5H004;F5H077;F5GWU8;F5H491;F5H0B7;F5H500;F5GYB5;F5H4H0;F5GYH7;F8WBC0	P61224;E7ESV4;F5H7Y6;F5GX62;A6NIZ1;F5H823;B7ZB78;F5GZG1;F5H6R7;F5H004	11;9;9;8;8;6;6;6;6;6;5;5;5;5;5;5;4;4;2	11;9;9;8;8;6;6;6;6;6;5;5;5;5;5;5;4;4;2	3;3;3;2;2;2;2;2;2;2;1;1;1;1;1;1;0;0;0	Ras-related protein Rap-1b;Ras-related protein Rap-1b-like protein	RAP1B	sp|P61224|RAP1B_HUMAN Ras-related protein Rap-1b OS=Homo sapiens OX=9606 GN=RAP1B PE=1 SV=1;tr|E7ESV4|E7ESV4_HUMAN Ras-related protein Rap-1b (Fragment) OS=Homo sapiens OX=9606 GN=RAP1B PE=1 SV=1;tr|F5H7Y6|F5H7Y6_HUMAN Ras-related protein Rap-1b OS=Homo sa	19	11	11	3	4	4	3	2	2	1	2	0	0	1	1	1	4	9	8	4	3	4	4	3	2	4	4	3	2	2	1	2	0	0	1	1	1	4	9	8	4	3
P61353;K7EQQ9;K7ERY7;K7ELC7	P61353;K7EQQ9;K7ERY7;K7ELC7	2;1;1;1	2;1;1;1	2;1;1;1	60S ribosomal protein L27	RPL27	sp|P61353|RL27_HUMAN 60S ribosomal protein L27 OS=Homo sapiens OX=9606 GN=RPL27 PE=1 SV=2;tr|K7EQQ9|K7EQQ9_HUMAN 60S ribosomal protein L27 OS=Homo sapiens OX=9606 GN=RPL27 PE=1 SV=2;tr|K7ERY7|K7ERY7_HUMAN 60S ribosomal protein L27 OS=Homo sapiens OX=9606 G	4	2	2	2	0	0	0	0	0	0	0	0	0	0	1	1	0	0	0	0	0	0	0	0	0	0	0	0	0	0	0	0	0	0	0	1	1	0	0	0	0	0
P61586;Q5JR08;P08134;Q5JR07;C9JNR4;E9PQH6;C9JX21;Q5JR05;E9PLA2;C9JRM1;Q5JR06;E9PN11;U3KQA9;U3KQV3	P61586;Q5JR08;P08134;Q5JR07;C9JNR4;E9PQH6;C9JX21;Q5JR05	8;6;6;5;5;5;5;5;2;2;2;2;2;2	8;6;6;5;5;5;5;5;2;2;2;2;2;2	7;5;5;4;4;4;4;4;1;1;1;1;1;1	Transforming protein RhoA;Rho-related GTP-binding protein RhoC	RHOA;RHOC	sp|P61586|RHOA_HUMAN Transforming protein RhoA OS=Homo sapiens OX=9606 GN=RHOA PE=1 SV=1;tr|Q5JR08|Q5JR08_HUMAN Rho-related GTP-binding protein RhoC (Fragment) OS=Homo sapiens OX=9606 GN=RHOC PE=1 SV=8;sp|P08134|RHOC_HUMAN Rho-related GTP-binding protein R	14	8	8	7	3	2	1	0	1	1	1	0	0	0	0	1	5	3	4	3	2	3	2	1	1	3	2	1	0	1	1	1	0	0	0	0	1	5	3	4	3	2
P61626;F8VV32;A0A0B4J259	P61626;F8VV32;A0A0B4J259	2;1;1	2;1;1	2;1;1	Lysozyme C;Lysozyme	LYZ	sp|P61626|LYSC_HUMAN Lysozyme C OS=Homo sapiens OX=9606 GN=LYZ PE=1 SV=1;tr|F8VV32|F8VV32_HUMAN 1,4-beta-N-acetylmuramidase C OS=Homo sapiens OX=9606 GN=LYZ PE=1 SV=1;tr|A0A0B4J259|A0A0B4J259_HUMAN 1,4-beta-N-acetylmuramidase C OS=Homo sapiens OX=9606 GN=L	3	2	2	2	0	0	0	0	0	0	0	0	0	0	1	1	0	1	0	0	0	0	0	0	0	0	0	0	0	0	0	0	0	0	0	1	1	0	1	0	0	0
P61981	P61981	4	2	2	14-3-3 protein gamma;14-3-3 protein gamma, N-terminally processed	YWHAG	sp|P61981|1433G_HUMAN 14-3-3 protein gamma OS=Homo sapiens OX=9606 GN=YWHAG PE=1 SV=2	1	4	2	2	0	0	0	1	0	0	1	0	0	0	0	2	1	0	1	1	1	0	0	0	0	0	0	0	1	0	0	1	0	0	0	0	1	0	0	0	0	0
P62070;E9PK85;P10301;E9PQK5;E9PQC5	P62070;E9PK85;P10301	3;2;2;1;1	3;2;2;1;1	3;2;2;1;1	Ras-related protein R-Ras2;Ras-related protein R-Ras	RRAS2;RRAS	sp|P62070|RRAS2_HUMAN Ras-related protein R-Ras2 OS=Homo sapiens OX=9606 GN=RRAS2 PE=1 SV=1;tr|E9PK85|E9PK85_HUMAN Ras-related protein R-Ras2 (Fragment) OS=Homo sapiens OX=9606 GN=RRAS2 PE=1 SV=1;sp|P10301|RRAS_HUMAN Ras-related protein R-Ras OS=Homo sapie	5	3	3	3	0	1	0	1	0	0	0	0	0	0	0	0	0	1	2	0	3	2	2	1	1	0	1	0	1	0	0	0	0	0	0	0	0	0	1	2	0	3
P62136;H0Y3Y6;E7ETD8;E9PMD7;F8VR82;F8VYE8;F8W0W8;P36873	P62136;H0Y3Y6;E7ETD8;E9PMD7;F8VR82;F8VYE8;F8W0W8;P36873	2;1;1;1;1;1;1;1	2;1;1;1;1;1;1;1	1;0;0;1;0;0;0;0	Serine/threonine-protein phosphatase PP1-alpha catalytic subunit;Serine/threonine-protein phosphatase;Serine/threonine-protein phosphatase PP1-gamma catalytic subunit	PPP1CA;PPP1CB;PPP1CC	sp|P62136|PP1A_HUMAN Serine/threonine-protein phosphatase PP1-alpha catalytic subunit OS=Homo sapiens OX=9606 GN=PPP1CA PE=1 SV=1;tr|H0Y3Y6|H0Y3Y6_HUMAN Serine/threonine-protein phosphatase PP1-beta catalytic subunit (Fragment) OS=Homo sapiens OX=9606 GN=P	8	2	2	1	1	0	0	0	0	0	0	0	0	0	0	0	0	1	1	0	0	0	0	0	0	1	0	0	0	0	0	0	0	0	0	0	0	0	1	1	0	0
P62241;Q5JR95	P62241;Q5JR95	9;8	9;8	9;8	40S ribosomal protein S8	RPS8	sp|P62241|RS8_HUMAN 40S ribosomal protein S8 OS=Homo sapiens OX=9606 GN=RPS8 PE=1 SV=2;tr|Q5JR95|Q5JR95_HUMAN 40S ribosomal protein S8 OS=Homo sapiens OX=9606 GN=RPS8 PE=1 SV=1	2	9	9	9	2	2	1	2	3	1	3	0	0	4	5	6	0	0	0	0	0	0	0	1	0	2	2	1	2	3	1	3	0	0	4	5	6	0	0	0	0	0
P62258;K7EM20;B4DJF2;I3L3T1;K7EIT4;Q04917;P31947;I3L0W5;A2IDB2	P62258;K7EM20	6;3;2;2;2;2;2;1;1	4;2;1;1;1;0;0;1;0	4;2;1;1;1;0;0;1;0	14-3-3 protein epsilon	YWHAE	sp|P62258|1433E_HUMAN 14-3-3 protein epsilon OS=Homo sapiens OX=9606 GN=YWHAE PE=1 SV=1;tr|K7EM20|K7EM20_HUMAN 14-3-3 protein epsilon (Fragment) OS=Homo sapiens OX=9606 GN=YWHAE PE=1 SV=1	9	6	4	4	1	0	1	1	1	0	0	0	0	0	1	2	3	1	3	1	1	0	0	0	0	1	0	1	1	1	0	0	0	0	0	1	1	2	1	2	0	0
P62318	P62318	1	1	1	Small nuclear ribonucleoprotein Sm D3	SNRPD3	sp|P62318|SMD3_HUMAN Small nuclear ribonucleoprotein Sm D3 OS=Homo sapiens OX=9606 GN=SNRPD3 PE=1 SV=1	1	1	1	1	0	0	0	0	0	0	0	0	0	0	0	1	1	1	1	1	1	1	1	0	1	0	0	0	0	0	0	0	0	0	0	0	1	1	1	1	1	1
P62330	P62330	3	3	3	ADP-ribosylation factor 6	ARF6	sp|P62330|ARF6_HUMAN ADP-ribosylation factor 6 OS=Homo sapiens OX=9606 GN=ARF6 PE=1 SV=2	1	3	3	3	0	0	0	0	0	0	0	0	0	0	0	0	1	2	1	2	1	0	1	1	0	0	0	0	0	0	0	0	0	0	0	0	0	1	2	1	2	1
P62424;Q5T8U3;Q5T8U2	P62424;Q5T8U3	5;4;2	5;4;2	5;4;2	60S ribosomal protein L7a	RPL7A	sp|P62424|RL7A_HUMAN 60S ribosomal protein L7a OS=Homo sapiens OX=9606 GN=RPL7A PE=1 SV=2;tr|Q5T8U3|Q5T8U3_HUMAN 60S ribosomal protein L7a (Fragment) OS=Homo sapiens OX=9606 GN=RPL7A PE=1 SV=1	3	5	5	5	0	0	0	0	0	0	2	1	1	2	0	3	0	0	0	0	0	0	0	0	0	0	0	0	0	0	0	2	1	1	2	0	3	0	0	0	0	0
P62753;A2A3R7;A2A3R5	P62753;A2A3R7	5;3;2	5;3;2	5;3;2	40S ribosomal protein S6	RPS6	sp|P62753|RS6_HUMAN 40S ribosomal protein S6 OS=Homo sapiens OX=9606 GN=RPS6 PE=1 SV=1;tr|A2A3R7|A2A3R7_HUMAN 40S ribosomal protein S6 OS=Homo sapiens OX=9606 GN=RPS6 PE=1 SV=1	3	5	5	5	0	0	0	0	0	0	1	0	0	3	1	3	0	0	0	0	0	0	0	0	0	0	0	0	0	0	0	1	0	0	3	1	3	0	0	0	0	0
P62805	P62805	9	9	9	Histone H4	HIST1H4A	sp|P62805|H4_HUMAN Histone H4 OS=Homo sapiens OX=9606 GN=H4C1 PE=1 SV=2	1	9	9	9	4	3	2	2	1	0	1	0	0	7	5	9	0	0	1	0	0	0	1	2	1	4	3	2	2	1	0	1	0	0	7	5	9	0	0	1	0	0
P62834;A0A075B6Q0	P62834;A0A075B6Q0	10;6	2;1	2;1	Ras-related protein Rap-1A	RAP1A	sp|P62834|RAP1A_HUMAN Ras-related protein Rap-1A OS=Homo sapiens OX=9606 GN=RAP1A PE=1 SV=1;tr|A0A075B6Q0|A0A075B6Q0_HUMAN Ras-related protein Rap-1A (Fragment) OS=Homo sapiens OX=9606 GN=RAP1A PE=1 SV=1	2	10	2	2	3	3	2	2	1	1	1	0	0	1	1	1	4	8	8	2	2	3	4	3	1	0	0	0	1	0	1	0	0	0	0	0	0	1	1	2	0	1
P62873;F6UT28;B1AKQ8;F6X3N5;B3KVK2	P62873;F6UT28;B1AKQ8;F6X3N5	8;6;5;5;3	8;6;5;5;3	6;4;3;3;3	Guanine nucleotide-binding protein G(I)/G(S)/G(T) subunit beta-1	GNB1	sp|P62873|GBB1_HUMAN Guanine nucleotide-binding protein G(I)/G(S)/G(T) subunit beta-1 OS=Homo sapiens OX=9606 GN=GNB1 PE=1 SV=3;tr|F6UT28|F6UT28_HUMAN Guanine nucleotide-binding protein G(I)/G(S)/G(T) subunit beta-1 (Fragment) OS=Homo sapiens OX=9606 GN=GN	5	8	8	6	4	4	2	0	2	0	1	0	0	1	1	1	2	4	3	1	1	2	1	2	0	4	4	2	0	2	0	1	0	0	1	1	1	2	4	3	1	1
P62937;F8WE65;C9J5S7;E5RIZ5;P0DN26;A0A0H2UH34;A0A0B4J2A2;A0A075B767;A0A075B759;Q9Y536;F5H284	P62937;F8WE65;C9J5S7	9;7;7;1;1;1;1;1;1;1;1	9;7;7;1;1;1;1;1;1;1;1	9;7;7;1;1;1;1;1;1;1;1	Peptidyl-prolyl cis-trans isomerase A;Peptidyl-prolyl cis-trans isomerase A, N-terminally processed;Peptidyl-prolyl cis-trans isomerase	PPIA	sp|P62937|PPIA_HUMAN Peptidyl-prolyl cis-trans isomerase A OS=Homo sapiens OX=9606 GN=PPIA PE=1 SV=2;tr|F8WE65|F8WE65_HUMAN Peptidyl-prolyl cis-trans isomerase OS=Homo sapiens OX=9606 GN=PPIA PE=1 SV=1;tr|C9J5S7|C9J5S7_HUMAN Peptidyl-prolyl cis-trans isome	11	9	9	9	1	2	1	0	2	0	0	0	0	0	0	1	2	3	7	4	3	4	2	3	2	1	2	1	0	2	0	0	0	0	0	0	1	2	3	7	4	3
P62942;Q1JUQ3;Q1JUQ5;A0A087WTS4;Q5W0X3;A0A087WV48;A0A087WZM5	P62942;Q1JUQ3;Q1JUQ5;A0A087WTS4;Q5W0X3;A0A087WV48;A0A087WZM5	2;1;1;1;1;1;1	2;1;1;1;1;1;1	2;1;1;1;1;1;1	Peptidyl-prolyl cis-trans isomerase FKBP1A;Peptidyl-prolyl cis-trans isomerase	FKBP1A;FKBP12-Exin;FKBP12-Exip2	sp|P62942|FKB1A_HUMAN Peptidyl-prolyl cis-trans isomerase FKBP1A OS=Homo sapiens OX=9606 GN=FKBP1A PE=1 SV=2;tr|Q1JUQ3|Q1JUQ3_HUMAN FK506 binding protein12 OS=Homo sapiens OX=9606 GN=FKBP1A PE=2 SV=1;tr|Q1JUQ5|Q1JUQ5_HUMAN Peptidylprolyl isomerase OS=Homo	7	2	2	2	1	0	0	0	0	0	0	0	0	0	0	0	2	1	2	1	1	0	0	1	1	1	0	0	0	0	0	0	0	0	0	0	0	2	1	2	1	1
P62993;J3KT38	P62993	3;1	3;1	3;1	Growth factor receptor-bound protein 2	GRB2	sp|P62993|GRB2_HUMAN Growth factor receptor-bound protein 2 OS=Homo sapiens OX=9606 GN=GRB2 PE=1 SV=1	2	3	3	3	0	0	0	0	1	0	1	0	0	0	0	0	0	1	1	0	0	0	0	0	0	0	0	0	0	1	0	1	0	0	0	0	0	0	1	1	0	0
P63000;P15153;B1AH77;B1AH80;B1AH78	P63000;P15153	10;5;4;4;3	10;5;4;4;3	5;1;1;1;1	Ras-related C3 botulinum toxin substrate 1;Ras-related C3 botulinum toxin substrate 2	RAC1;RAC2	sp|P63000|RAC1_HUMAN Ras-related C3 botulinum toxin substrate 1 OS=Homo sapiens OX=9606 GN=RAC1 PE=1 SV=1;sp|P15153|RAC2_HUMAN Ras-related C3 botulinum toxin substrate 2 OS=Homo sapiens OX=9606 GN=RAC2 PE=1 SV=1	5	10	10	5	6	5	1	2	2	1	2	1	1	1	1	2	3	4	5	6	6	4	2	3	1	6	5	1	2	2	1	2	1	1	1	1	2	3	4	5	6	6
P63010;A0A087X253;A0A087WU93;A0A087WZQ6;A0A087WYD1;K7ERB2;K7EN71;K7EJ01;H7C034;K7EJX1;A0A087WXS3;K7EKZ5	P63010;A0A087X253;A0A087WU93;A0A087WZQ6	25;21;16;16;12;6;5;4;3;2;1;1	25;21;16;16;12;6;5;4;3;2;1;1	14;14;6;6;6;2;2;1;0;2;1;1	AP-2 complex subunit beta	AP2B1	sp|P63010|AP2B1_HUMAN AP-2 complex subunit beta OS=Homo sapiens OX=9606 GN=AP2B1 PE=1 SV=1;tr|A0A087X253|A0A087X253_HUMAN AP complex subunit beta OS=Homo sapiens OX=9606 GN=AP2B1 PE=1 SV=1;tr|A0A087WU93|A0A087WU93_HUMAN AP-2 complex subunit beta (Fragment)	12	25	25	14	1	5	2	2	2	0	1	1	0	0	0	0	9	12	13	7	9	4	4	8	2	1	5	2	2	2	0	1	1	0	0	0	0	9	12	13	7	9
P63092;Q5JWF2;A0A590UJY2;A0A590UJF0;B0AZR9;A0A590UJ58;A0A0A0MR13;A0A590UJB0;P38405;A0A590UK28;A0A590UKA4;A0A590UJ22;S4R3E3;A0A590UJS2;A0A590UJQ2;A0A590UJG5;A0A590UJJ0;A0A590UKB4;A0A590UJQ9;A0A590UJI6;A0A590UJR6	P63092;Q5JWF2;A0A590UJY2;A0A590UJF0;B0AZR9;A0A590UJ58;A0A0A0MR13;A0A590UJB0	6;6;5;5;5;5;4;4;2;1;1;1;1;1;1;1;1;1;1;1;1	6;6;5;5;5;5;4;4;2;1;1;1;1;1;1;1;1;1;1;1;1	5;5;5;5;5;5;4;4;1;1;1;1;1;1;1;1;1;1;1;1;1	Guanine nucleotide-binding protein G(s) subunit alpha isoforms short;Guanine nucleotide-binding protein G(s) subunit alpha isoforms XLas	GNAS	sp|P63092|GNAS2_HUMAN Guanine nucleotide-binding protein G(s) subunit alpha isoforms short OS=Homo sapiens OX=9606 GN=GNAS PE=1 SV=1;sp|Q5JWF2|GNAS1_HUMAN Guanine nucleotide-binding protein G(s) subunit alpha isoforms XLas OS=Homo sapiens OX=9606 GN=GNAS P	21	6	6	5	2	3	1	2	2	2	1	0	0	1	1	2	1	1	2	1	1	1	1	1	1	2	3	1	2	2	2	1	0	0	1	1	2	1	1	2	1	1
P63104;E7EX29;E7ESK7;B0AZS6;E5RGE1;E5RIR4;E9PD24;E7EVZ2;B7Z2E6;H0YB80	P63104;E7EX29;E7ESK7;B0AZS6	10;7;6;6;4;4;4;4;4;4	10;7;6;6;4;4;4;4;4;4	8;5;5;5;3;3;3;3;3;3	14-3-3 protein zeta/delta	YWHAZ	sp|P63104|1433Z_HUMAN 14-3-3 protein zeta/delta OS=Homo sapiens OX=9606 GN=YWHAZ PE=1 SV=1;tr|E7EX29|E7EX29_HUMAN 14-3-3 protein zeta/delta (Fragment) OS=Homo sapiens OX=9606 GN=YWHAZ PE=1 SV=1;tr|E7ESK7|E7ESK7_HUMAN 14-3-3 protein zeta/delta (Fragment) OS	10	10	10	8	4	4	0	0	0	1	1	0	0	0	0	3	2	4	4	3	3	0	0	1	0	4	4	0	0	0	1	1	0	0	0	0	3	2	4	4	3	3
P63167;Q96FJ2;F8VXI7;F8VXL2;F8VRV5	P63167;Q96FJ2	4;3;1;1;1	4;3;1;1;1	4;3;1;1;1	Dynein light chain 1, cytoplasmic;Dynein light chain 2, cytoplasmic	DYNLL1;DYNLL2	sp|P63167|DYL1_HUMAN Dynein light chain 1, cytoplasmic OS=Homo sapiens OX=9606 GN=DYNLL1 PE=1 SV=1;sp|Q96FJ2|DYL2_HUMAN Dynein light chain 2, cytoplasmic OS=Homo sapiens OX=9606 GN=DYNLL2 PE=1 SV=1	5	4	4	4	0	0	0	1	0	0	0	0	0	0	0	0	3	3	4	4	3	3	3	2	2	0	0	0	1	0	0	0	0	0	0	0	0	3	3	4	4	3
P63244;H0YAF8;D6R9Z1;D6RAC2;J3KPE3;H0Y8W2;D6R9L0;D6REE5;H0Y8R5;D6RFX4;D6RHH4;H0YAM7;D6RF23;D6RAU2;E9PD14;D6RBD0;D6RFZ9;D6RGK8;H0Y9P0;D6R909	P63244;H0YAF8;D6R9Z1;D6RAC2;J3KPE3;H0Y8W2;D6R9L0;D6REE5;H0Y8R5;D6RFX4;D6RHH4;H0YAM7	5;4;4;4;4;4;4;4;3;3;3;3;2;2;2;2;2;1;1;1	5;4;4;4;4;4;4;4;3;3;3;3;2;2;2;2;2;1;1;1	5;4;4;4;4;4;4;4;3;3;3;3;2;2;2;2;2;1;1;1	Guanine nucleotide-binding protein subunit beta-2-like 1;Guanine nucleotide-binding protein subunit beta-2-like 1, N-terminally processed	GNB2L1	sp|P63244|RACK1_HUMAN Receptor of activated protein C kinase 1 OS=Homo sapiens OX=9606 GN=RACK1 PE=1 SV=3;tr|H0YAF8|H0YAF8_HUMAN Receptor of-activated protein C kinase 1 (Fragment) OS=Homo sapiens OX=9606 GN=RACK1 PE=1 SV=1;tr|D6R9Z1|D6R9Z1_HUMAN Receptor	20	5	5	5	0	0	0	0	0	0	0	0	0	0	0	0	3	0	5	3	1	2	0	0	0	0	0	0	0	0	0	0	0	0	0	0	0	3	0	5	3	1
P63261;I3L3I0;I3L1U9;I3L3R2;J3KT65;I3L4N8;K7EM38	P63261;I3L3I0;I3L1U9;I3L3R2;J3KT65;I3L4N8	24;16;16;12;12;12;11	24;16;16;12;12;12;11	1;1;1;1;1;1;1	Actin, cytoplasmic 2;Actin, cytoplasmic 2, N-terminally processed	ACTG1	sp|P63261|ACTG_HUMAN Actin, cytoplasmic 2 OS=Homo sapiens OX=9606 GN=ACTG1 PE=1 SV=1;tr|I3L3I0|I3L3I0_HUMAN Actin, cytoplasmic 2 (Fragment) OS=Homo sapiens OX=9606 GN=ACTG1 PE=1 SV=1;tr|I3L1U9|I3L1U9_HUMAN Actin, cytoplasmic 2 (Fragment) OS=Homo sapiens OX	7	24	24	1	13	12	11	6	12	5	7	3	5	5	6	6	10	10	11	10	11	9	7	8	9	13	12	11	6	12	5	7	3	5	5	6	6	10	10	11	10	11
P68133;P68032;P63267;P62736;A6NL76;C9JFL5;F6UVQ4;F6QUT6;F8WB63;B8ZZJ2	P68133;P68032;P63267;P62736;A6NL76;C9JFL5;F6UVQ4;F6QUT6;F8WB63;B8ZZJ2	16;15;14;14;13;10;10;10;9;9	3;2;2;2;3;2;2;2;1;1	3;2;2;2;3;2;2;2;1;1	Actin, alpha skeletal muscle;Actin, alpha cardiac muscle 1;Actin, gamma-enteric smooth muscle;Actin, aortic smooth muscle	ACTA1;ACTC1;ACTG2;ACTA2	sp|P68133|ACTS_HUMAN Actin, alpha skeletal muscle OS=Homo sapiens OX=9606 GN=ACTA1 PE=1 SV=1;sp|P68032|ACTC_HUMAN Actin, alpha cardiac muscle 1 OS=Homo sapiens OX=9606 GN=ACTC1 PE=1 SV=1;sp|P63267|ACTH_HUMAN Actin, gamma-enteric smooth muscle OS=Homo sapie	10	16	3	3	7	4	7	4	6	4	8	3	5	3	3	3	5	4	5	6	6	6	4	3	6	0	0	0	0	0	0	2	0	0	0	0	0	1	1	1	1	1
P68363;F8VVB9;F8VQQ4;F8VRZ4;F8VS66;F8VX09;F8VWV9;F8VRK0;C9K0S6;F8W0F6;F8VXZ7;A6NHL2	P68363;F8VVB9;F8VQQ4	15;9;8;7;7;6;6;4;2;2;1;1	15;9;8;7;7;6;6;4;2;2;1;1	0;0;0;0;0;0;0;0;0;0;0;0	Tubulin alpha-1B chain	TUBA1B;TUBA1A	sp|P68363|TBA1B_HUMAN Tubulin alpha-1B chain OS=Homo sapiens OX=9606 GN=TUBA1B PE=1 SV=1;tr|F8VVB9|F8VVB9_HUMAN Tubulin alpha-1B chain (Fragment) OS=Homo sapiens OX=9606 GN=TUBA1B PE=1 SV=8;tr|F8VQQ4|F8VQQ4_HUMAN Tubulin alpha chain (Fragment) OS=Homo sapi	12	15	15	0	7	7	8	2	6	5	4	0	0	1	1	8	6	9	10	9	5	5	4	6	4	7	7	8	2	6	5	4	0	0	1	1	8	6	9	10	9	5
P68366;C9JEV8;C9JQ00;C9JJQ8;C9JDL2	P68366	14;6;6;6;5	5;4;4;4;3	5;4;4;4;3	Tubulin alpha-4A chain	TUBA4A	sp|P68366|TBA4A_HUMAN Tubulin alpha-4A chain OS=Homo sapiens OX=9606 GN=TUBA4A PE=1 SV=1	5	14	5	5	7	7	6	3	7	4	5	0	0	1	1	7	6	10	11	6	5	4	3	6	3	2	3	1	1	3	0	1	0	0	0	0	2	2	3	3	0	0
P68371;P04350;M0R2D3;M0QY85;M0R042;M0QYM7;M0R0X0;M0R2T4;M0QY37;M0QX14;M0QZL7;M0R278	P68371;P04350	15;9;4;3;3;3;2;2;2;2;2;2	12;7;3;3;3;3;2;2;2;2;2;2	3;2;2;2;2;2;2;2;2;2;1;1	Tubulin beta-4B chain;Tubulin beta-4A chain	TUBB4B;TUBB4A	sp|P68371|TBB4B_HUMAN Tubulin beta-4B chain OS=Homo sapiens OX=9606 GN=TUBB4B PE=1 SV=1;sp|P04350|TBB4A_HUMAN Tubulin beta-4A chain OS=Homo sapiens OX=9606 GN=TUBB4A PE=1 SV=2	12	15	12	3	8	8	6	2	1	1	3	0	0	0	0	5	4	4	5	3	1	1	1	1	1	6	7	5	1	0	0	2	0	0	0	0	4	2	3	3	2	0
P68871;A0A2R8Y7R2;F8W6P5	P68871;A0A2R8Y7R2;F8W6P5	9;6;5	7;4;4	3;2;2	Hemoglobin subunit beta;LVV-hemorphin-7;Spinorphin	HBB	sp|P68871|HBB_HUMAN Hemoglobin subunit beta OS=Homo sapiens OX=9606 GN=HBB PE=1 SV=2;tr|A0A2R8Y7R2|A0A2R8Y7R2_HUMAN Hemoglobin subunit beta OS=Homo sapiens OX=9606 GN=HBB PE=1 SV=1;tr|F8W6P5|F8W6P5_HUMAN Hemoglobin subunit beta (Fragment) OS=Homo sapiens O	3	9	7	3	2	1	1	2	1	2	6	1	5	1	1	1	2	3	3	3	3	3	3	2	1	1	0	0	1	0	1	6	1	3	0	0	0	0	1	1	1	1
P69905;A0A2R8Y7C0	P69905;A0A2R8Y7C0	6;5	1;1	1;1	Hemoglobin subunit alpha	HBA1	sp|P69905|HBA_HUMAN Hemoglobin subunit alpha OS=Homo sapiens OX=9606 GN=HBA1 PE=1 SV=2;tr|A0A2R8Y7C0|A0A2R8Y7C0_HUMAN Hemoglobin subunit alpha (Fragment) OS=Homo sapiens OX=9606 GN=HBA2 PE=1 SV=1	2	6	1	1	2	0	2	1	2	1	4	2	5	1	1	2	2	2	2	2	1	2	2	2	2	0	0	0	0	0	0	1	0	1	0	0	0	0	0	0	0	0
P78310	P78310	2	2	2	Coxsackievirus and adenovirus receptor	CXADR	sp|P78310|CXAR_HUMAN Coxsackievirus and adenovirus receptor OS=Homo sapiens OX=9606 GN=CXADR PE=1 SV=1	1	2	2	2	0	0	0	0	1	0	0	0	0	0	0	0	2	0	2	0	1	1	1	0	1	0	0	0	0	1	0	0	0	0	0	0	0	2	0	2	0	1
P78368;K7ESB6;A0A087WZK4;A0A087WW97;A0A087WWF5;U3KQA5;A0A0U1RQT7;Q8IXA3;A0A0U1RQY7;U3KQB3;Q9HCP0;A0A0U1RQK2;A0A0U1RR14;A0A087WXD7;K7EP38;A0A0U1RRH5;K7EJC0;A0A0U1RQH9	P78368;K7ESB6;A0A087WZK4	8;5;4;3;3;3;3;3;3;3;3;2;2;2;1;1;1;1	3;2;1;1;1;0;0;0;0;0;0;0;0;1;0;0;0;0	2;2;0;0;1;0;0;0;0;0;0;0;0;1;0;0;0;0	Casein kinase I isoform gamma-2	CSNK1G2	sp|P78368|KC1G2_HUMAN Casein kinase I isoform gamma-2 OS=Homo sapiens OX=9606 GN=CSNK1G2 PE=1 SV=1;tr|K7ESB6|K7ESB6_HUMAN Casein kinase I isoform gamma-2 (Fragment) OS=Homo sapiens OX=9606 GN=CSNK1G2 PE=1 SV=1;tr|A0A087WZK4|A0A087WZK4_HUMAN Casein kinase I	18	8	3	2	0	1	0	0	2	0	0	0	0	0	0	0	3	3	4	1	2	2	1	2	1	0	0	0	0	0	0	0	0	0	0	0	0	0	2	0	0	0
P81605	P81605	3	3	3	Dermcidin;Survival-promoting peptide;DCD-1	DCD	sp|P81605|DCD_HUMAN Dermcidin OS=Homo sapiens OX=9606 GN=DCD PE=1 SV=2	1	3	3	3	0	0	0	0	0	0	0	0	0	0	0	2	2	1	2	0	3	2	0	1	2	0	0	0	0	0	0	0	0	0	0	0	2	2	1	2	0	3
P84077;P61204;F5H423;F5H0C7;C9J1Z8;P84085;C9JPM4;P18085;H0YGG7;C9JAK5;F5H1V1;F5H6T5;F8WDB3	P84077;P61204;F5H423;F5H0C7;C9J1Z8;P84085	10;10;8;5;5;5;4;4;2;2;1;1;1	10;10;8;5;5;5;4;4;2;2;1;1;1	10;10;8;5;5;5;4;4;2;2;1;1;1	ADP-ribosylation factor 1;ADP-ribosylation factor 3;ADP-ribosylation factor 5	ARF1;ARF3;ARF5	sp|P84077|ARF1_HUMAN ADP-ribosylation factor 1 OS=Homo sapiens OX=9606 GN=ARF1 PE=1 SV=2;sp|P61204|ARF3_HUMAN ADP-ribosylation factor 3 OS=Homo sapiens OX=9606 GN=ARF3 PE=1 SV=2;tr|F5H423|F5H423_HUMAN Uncharacterized protein OS=Homo sapiens OX=9606 PE=3 SV	13	10	10	10	0	0	0	0	0	0	0	0	0	0	0	0	6	6	7	6	5	4	2	3	3	0	0	0	0	0	0	0	0	0	0	0	0	6	6	7	6	5
P84095	P84095	6	5	5	Rho-related GTP-binding protein RhoG	RHOG	sp|P84095|RHOG_HUMAN Rho-related GTP-binding protein RhoG OS=Homo sapiens OX=9606 GN=RHOG PE=1 SV=1	1	6	5	5	3	3	0	0	0	0	1	0	0	0	0	0	0	2	3	2	2	0	2	1	0	3	2	0	0	0	0	1	0	0	0	0	0	0	2	2	1	1
P98172	P98172	4	4	4	Ephrin-B1	EFNB1	sp|P98172|EFNB1_HUMAN Ephrin-B1 OS=Homo sapiens OX=9606 GN=EFNB1 PE=1 SV=1	1	4	4	4	2	2	1	1	2	2	0	0	0	0	0	0	1	2	2	1	0	1	1	1	0	2	2	1	1	2	2	0	0	0	0	0	0	1	2	2	1	0
Q01469	Q01469	1	1	1	Fatty acid-binding protein, epidermal	FABP5	sp|Q01469|FABP5_HUMAN Fatty acid-binding protein 5 OS=Homo sapiens OX=9606 GN=FABP5 PE=1 SV=3	1	1	1	1	0	0	0	0	0	0	0	0	0	0	0	1	1	1	1	1	1	0	1	0	0	0	0	0	0	0	0	0	0	0	0	0	1	1	1	1	1	1
Q01650	Q01650	4	4	4	Large neutral amino acids transporter small subunit 1	SLC7A5	sp|Q01650|LAT1_HUMAN Large neutral amino acids transporter small subunit 1 OS=Homo sapiens OX=9606 GN=SLC7A5 PE=1 SV=2	1	4	4	4	3	1	1	1	2	0	2	0	0	0	0	0	2	1	3	2	1	1	2	1	0	3	1	1	1	2	0	2	0	0	0	0	0	2	1	3	2	1
Q02413	Q02413	4	4	4	Desmoglein-1	DSG1	sp|Q02413|DSG1_HUMAN Desmoglein-1 OS=Homo sapiens OX=9606 GN=DSG1 PE=1 SV=2	1	4	4	4	0	0	0	1	0	0	0	0	0	0	0	1	2	2	3	2	3	4	1	1	2	0	0	0	1	0	0	0	0	0	0	0	1	2	2	3	2	3
Q02878;F8VR69;F8VZ45;U3KQR5	Q02878	3;1;1;1	3;1;1;1	3;1;1;1	60S ribosomal protein L6	RPL6	sp|Q02878|RL6_HUMAN 60S ribosomal protein L6 OS=Homo sapiens OX=9606 GN=RPL6 PE=1 SV=3	4	3	3	3	0	0	0	0	0	0	0	0	1	0	0	3	0	0	0	0	0	0	0	0	0	0	0	0	0	0	0	0	0	1	0	0	3	0	0	0	0	0
Q04721	Q04721	1	1	1	Neurogenic locus notch homolog protein 2;Notch 2 extracellular truncation;Notch 2 intracellular domain	NOTCH2	sp|Q04721|NOTC2_HUMAN Neurogenic locus notch homolog protein 2 OS=Homo sapiens OX=9606 GN=NOTCH2 PE=1 SV=3	1	1	1	1	0	1	0	0	0	0	0	0	0	0	0	0	0	0	0	0	0	0	0	0	0	0	1	0	0	0	0	0	0	0	0	0	0	0	0	0	0	0
Q08431;H0YKS8;A0A087WUV5	Q08431;H0YKS8	16;10;3	16;10;3	16;10;3	Lactadherin;Lactadherin short form;Medin	MFGE8	sp|Q08431|MFGM_HUMAN Lactadherin OS=Homo sapiens OX=9606 GN=MFGE8 PE=1 SV=3;tr|H0YKS8|H0YKS8_HUMAN Lactadherin (Fragment) OS=Homo sapiens OX=9606 GN=MFGE8 PE=1 SV=1	3	16	16	16	7	8	5	3	5	1	2	0	0	4	2	6	7	9	8	5	6	3	5	5	5	7	8	5	3	5	1	2	0	0	4	2	6	7	9	8	5	6
Q08554	Q08554	2	2	2	Desmocollin-1	DSC1	sp|Q08554|DSC1_HUMAN Desmocollin-1 OS=Homo sapiens OX=9606 GN=DSC1 PE=1 SV=2	1	2	2	2	0	0	0	0	0	0	0	0	0	0	0	1	1	1	1	1	0	2	1	0	0	0	0	0	0	0	0	0	0	0	0	0	1	1	1	1	1	0
Q0JRZ9;H7BXJ4;H0YAE2	Q0JRZ9;H7BXJ4	16;8;5	16;8;5	16;8;5	F-BAR domain only protein 2	FCHO2	sp|Q0JRZ9|FCHO2_HUMAN F-BAR domain only protein 2 OS=Homo sapiens OX=9606 GN=FCHO2 PE=1 SV=2;tr|H7BXJ4|H7BXJ4_HUMAN F-BAR domain only protein 2 OS=Homo sapiens OX=9606 GN=FCHO2 PE=1 SV=1	3	16	16	16	4	5	2	0	3	1	0	0	0	0	0	0	4	12	10	7	5	3	3	5	3	4	5	2	0	3	1	0	0	0	0	0	0	4	12	10	7	5
Q10567;C9J1E7	Q10567;C9J1E7	13;11	2;1	2;1	AP-1 complex subunit beta-1	AP1B1	sp|Q10567|AP1B1_HUMAN AP-1 complex subunit beta-1 OS=Homo sapiens OX=9606 GN=AP1B1 PE=1 SV=2;tr|C9J1E7|C9J1E7_HUMAN AP-1 complex subunit beta-1 (Fragment) OS=Homo sapiens OX=9606 GN=AP1B1 PE=1 SV=1	2	13	2	2	1	3	1	1	1	0	1	1	0	0	0	0	5	7	8	6	6	3	3	6	2	0	1	0	0	0	0	0	0	0	0	0	0	0	1	1	1	0
Q13308;H0Y8F1;Q86X91;C9JQR6;H7C5L0	Q13308	5;2;2;1;1	5;2;2;1;1	5;2;2;1;1	Inactive tyrosine-protein kinase 7	PTK7	sp|Q13308|PTK7_HUMAN Inactive tyrosine-protein kinase 7 OS=Homo sapiens OX=9606 GN=PTK7 PE=1 SV=2	5	5	5	5	5	0	0	0	0	0	0	0	0	0	0	0	1	1	0	1	0	0	0	0	0	5	0	0	0	0	0	0	0	0	0	0	0	1	1	0	1	0
Q13404	Q13404	1	1	1	Ubiquitin-conjugating enzyme E2 variant 1	UBE2V1	sp|Q13404|UB2V1_HUMAN Ubiquitin-conjugating enzyme E2 variant 1 OS=Homo sapiens OX=9606 GN=UBE2V1 PE=1 SV=2	1	1	1	1	1	1	0	0	0	0	0	0	0	0	0	0	0	0	0	0	0	0	0	0	0	1	1	0	0	0	0	0	0	0	0	0	0	0	0	0	0	0
Q13835	Q13835	1	1	1	Plakophilin-1	PKP1	sp|Q13835|PKP1_HUMAN Plakophilin-1 OS=Homo sapiens OX=9606 GN=PKP1 PE=1 SV=2	1	1	1	1	0	0	0	0	0	0	0	0	0	0	0	0	0	0	0	1	0	0	0	0	0	0	0	0	0	0	0	0	0	0	0	0	0	0	0	0	1	0
Q14126;J3KSI6	Q14126	3;1	3;1	3;1	Desmoglein-2	DSG2	sp|Q14126|DSG2_HUMAN Desmoglein-2 OS=Homo sapiens OX=9606 GN=DSG2 PE=1 SV=2	2	3	3	3	2	0	2	0	0	0	0	0	0	0	0	0	0	1	0	0	0	0	0	0	0	2	0	2	0	0	0	0	0	0	0	0	0	0	1	0	0	0
Q14344	Q14344	2	2	2	Guanine nucleotide-binding protein subunit alpha-13	GNA13	sp|Q14344|GNA13_HUMAN Guanine nucleotide-binding protein subunit alpha-13 OS=Homo sapiens OX=9606 GN=GNA13 PE=1 SV=2	1	2	2	2	0	0	0	1	0	0	0	0	0	0	0	0	0	1	0	0	0	0	0	0	0	0	0	0	1	0	0	0	0	0	0	0	0	0	1	0	0	0
Q14974;J3KTM9;J3QR48;J3QKQ5;J3QRG4	Q14974;J3KTM9	10;7;3;2;1	10;7;3;2;1	10;7;3;2;1	Importin subunit beta-1	KPNB1	sp|Q14974|IMB1_HUMAN Importin subunit beta-1 OS=Homo sapiens OX=9606 GN=KPNB1 PE=1 SV=2;tr|J3KTM9|J3KTM9_HUMAN Importin subunit beta-1 (Fragment) OS=Homo sapiens OX=9606 GN=KPNB1 PE=1 SV=1	5	10	10	10	1	3	0	1	0	0	0	0	0	0	0	0	3	6	6	3	4	2	2	2	0	1	3	0	1	0	0	0	0	0	0	0	0	3	6	6	3	4
Q15365	Q15365	5	3	3	Poly(rC)-binding protein 1	PCBP1	sp|Q15365|PCBP1_HUMAN Poly(rC)-binding protein 1 OS=Homo sapiens OX=9606 GN=PCBP1 PE=1 SV=2	1	5	3	3	3	2	1	3	0	1	1	0	0	0	0	0	4	3	3	2	2	3	1	2	1	3	2	0	2	0	0	0	0	0	0	0	0	2	2	2	1	1
Q15393	Q15393	5	5	5	Splicing factor 3B subunit 3	SF3B3	sp|Q15393|SF3B3_HUMAN Splicing factor 3B subunit 3 OS=Homo sapiens OX=9606 GN=SF3B3 PE=1 SV=4	1	5	5	5	4	1	1	0	0	1	0	0	0	0	0	0	0	0	0	0	0	0	0	0	0	4	1	1	0	0	1	0	0	0	0	0	0	0	0	0	0	0
Q15758;M0QXM4;M0QX44;M0R144	Q15758;M0QXM4	13;9;3;2	13;9;3;2	13;9;3;2	Neutral amino acid transporter B(0);Amino acid transporter	SLC1A5	sp|Q15758|AAAT_HUMAN Neutral amino acid transporter B(0) OS=Homo sapiens OX=9606 GN=SLC1A5 PE=1 SV=2;tr|M0QXM4|M0QXM4_HUMAN Amino acid transporter OS=Homo sapiens OX=9606 GN=SLC1A5 PE=1 SV=1	4	13	13	13	7	6	4	1	3	3	1	0	0	1	1	3	7	7	7	5	5	6	6	6	6	7	6	4	1	3	3	1	0	0	1	1	3	7	7	7	5	5
Q15773;F5H7L5;F5H800;F5H0Y3	Q15773	6;2;2;2	6;2;2;2	6;2;2;2	Myeloid leukemia factor 2	MLF2	sp|Q15773|MLF2_HUMAN Myeloid leukemia factor 2 OS=Homo sapiens OX=9606 GN=MLF2 PE=1 SV=1	4	6	6	6	1	2	0	0	1	0	0	0	0	0	0	0	2	4	5	4	2	3	0	1	1	1	2	0	0	1	0	0	0	0	0	0	0	2	4	5	4	2
Q15811;F8W7U0;A8CTZ0;C9JQZ7;D6PAW0;H7C429;H0Y523;H0Y6W3;Q6J334;H0Y3G5	Q15811;F8W7U0;A8CTZ0	24;22;21;6;4;2;2;1;1;1	24;22;21;6;4;2;2;1;1;1	9;9;9;3;3;1;2;0;0;0	Intersectin-1	ITSN1	sp|Q15811|ITSN1_HUMAN Intersectin-1 OS=Homo sapiens OX=9606 GN=ITSN1 PE=1 SV=3;tr|F8W7U0|F8W7U0_HUMAN Intersectin-1 OS=Homo sapiens OX=9606 GN=ITSN1 PE=1 SV=1;tr|A8CTZ0|A8CTZ0_HUMAN Intersectin 1 short form variant 13 OS=Homo sapiens OX=9606 GN=ITSN1 PE=1	10	24	24	9	9	8	2	2	2	2	2	0	0	0	0	0	8	11	13	10	10	7	8	7	4	9	8	2	2	2	2	2	0	0	0	0	0	8	11	13	10	10
Q16778;P33778;P23527;P06899;Q8N257;Q6DRA6;Q6DN03	Q16778;P33778;P23527;P06899;Q8N257	6;6;6;6;4;2;2	2;2;2;2;2;2;2	2;2;2;2;2;2;2	Histone H2B type 2-E;Histone H2B type 1-B;Histone H2B type 1-O;Histone H2B type 1-J;Histone H2B type 3-B	HIST2H2BE;HIST1H2BB;HIST1H2BO;HIST1H2BJ;HIST3H2BB	sp|Q16778|H2B2E_HUMAN Histone H2B type 2-E OS=Homo sapiens OX=9606 GN=H2BC21 PE=1 SV=3;sp|P33778|H2B1B_HUMAN Histone H2B type 1-B OS=Homo sapiens OX=9606 GN=H2BC3 PE=1 SV=2;sp|P23527|H2B1O_HUMAN Histone H2B type 1-O OS=Homo sapiens OX=9606 GN=H2BC17 PE=1 S	7	6	2	2	2	2	1	0	2	2	2	0	2	2	2	3	0	0	0	0	0	0	1	0	0	0	0	0	0	0	0	0	0	0	1	1	1	0	0	0	0	0
Q53EZ4;H0Y432	Q53EZ4	20;9	20;9	20;9	Centrosomal protein of 55 kDa	CEP55	sp|Q53EZ4|CEP55_HUMAN Centrosomal protein of 55 kDa OS=Homo sapiens OX=9606 GN=CEP55 PE=1 SV=3	2	20	20	20	6	11	3	8	4	1	3	1	0	0	0	0	4	7	6	5	4	5	4	5	4	6	11	3	8	4	1	3	1	0	0	0	0	4	7	6	5	4
Q53FA3;P34931	Q53FA3;P34931	14;14	1;1	1;1	Heat shock 70 kDa protein 1-like	HSPA1L	tr|Q53FA3|Q53FA3_HUMAN HSPA1L (Fragment) OS=Homo sapiens OX=9606 GN=HSPA1L PE=1 SV=1;sp|P34931|HS71L_HUMAN Heat shock 70 kDa protein 1-like OS=Homo sapiens OX=9606 GN=HSPA1L PE=1 SV=2	2	14	1	1	9	10	9	7	8	6	3	0	1	3	3	4	6	8	7	6	6	6	6	6	6	1	0	0	0	0	0	0	0	0	0	0	0	0	0	0	0	0
Q58FF8	Q58FF8	6	2	2	Putative heat shock protein HSP 90-beta 2	HSP90AB2P	sp|Q58FF8|H90B2_HUMAN Putative heat shock protein HSP 90-beta 2 OS=Homo sapiens OX=9606 GN=HSP90AB2P PE=1 SV=2	1	6	2	2	1	2	0	1	0	1	0	0	0	2	0	0	1	4	4	3	2	1	2	1	2	1	0	0	0	0	0	0	0	0	0	0	0	0	1	1	0	0
Q5H936;Q13530	Q5H936;Q13530	1;1	1;1	1;1	Serine incorporator 3	SERINC3	tr|Q5H936|Q5H936_HUMAN Serine incorporator 3 (Fragment) OS=Homo sapiens OX=9606 GN=SERINC3 PE=1 SV=1;sp|Q13530|SERC3_HUMAN Serine incorporator 3 OS=Homo sapiens OX=9606 GN=SERINC3 PE=2 SV=2	2	1	1	1	0	0	0	0	0	0	0	0	0	0	0	0	1	1	1	0	1	1	1	1	0	0	0	0	0	0	0	0	0	0	0	0	0	1	1	1	0	1
Q5JP53;P07437;Q5ST81;Q9BVA1;Q13885;G3V2A3;A0A075B736;Q5SQY0;Q3ZCM7;A6NNZ2;M0R1I1	Q5JP53;P07437;Q5ST81;Q9BVA1;Q13885	14;14;13;9;9;4;4;4;4;4;1	2;2;1;0;0;0;0;0;0;0;0	2;2;1;0;0;0;0;0;0;0;0	Tubulin beta chain;Tubulin beta-2B chain;Tubulin beta-2A chain	TUBB;TUBB2B;TUBB2A	tr|Q5JP53|Q5JP53_HUMAN Tubulin beta chain OS=Homo sapiens OX=9606 GN=TUBB PE=1 SV=1;sp|P07437|TBB5_HUMAN Tubulin beta chain OS=Homo sapiens OX=9606 GN=TUBB PE=1 SV=2;tr|Q5ST81|Q5ST81_HUMAN Tubulin beta chain OS=Homo sapiens OX=9606 GN=TUBB PE=1 SV=1;sp|Q9B	11	14	2	2	9	8	6	1	3	2	3	0	0	0	0	7	4	3	6	3	2	1	2	2	2	2	1	1	0	2	1	0	0	0	0	0	2	0	0	1	1	1
Q5JPT2;Q96B97;Q5JPT1;Q5VSN0	Q5JPT2;Q96B97;Q5JPT1;Q5VSN0	2;2;1;1	2;2;1;1	2;2;1;1	SH3 domain-containing kinase-binding protein 1	SH3KBP1	tr|Q5JPT2|Q5JPT2_HUMAN SH3 domain-containing kinase-binding protein 1 (Fragment) OS=Homo sapiens OX=9606 GN=SH3KBP1 PE=1 SV=1;sp|Q96B97|SH3K1_HUMAN SH3 domain-containing kinase-binding protein 1 OS=Homo sapiens OX=9606 GN=SH3KBP1 PE=1 SV=2;tr|Q5JPT1|Q5JPT1	4	2	2	2	1	1	0	0	0	0	0	0	0	0	0	0	0	0	2	0	0	0	0	0	0	1	1	0	0	0	0	0	0	0	0	0	0	0	0	2	0	0
Q5T0F9;H0Y517;H7C1U3	Q5T0F9;H0Y517;H7C1U3	2;1;1	2;1;1	2;1;1	Coiled-coil and C2 domain-containing protein 1B	CC2D1B	sp|Q5T0F9|C2D1B_HUMAN Coiled-coil and C2 domain-containing protein 1B OS=Homo sapiens OX=9606 GN=CC2D1B PE=1 SV=1;tr|H0Y517|H0Y517_HUMAN Coiled-coil and C2 domain-containing protein 1B (Fragment) OS=Homo sapiens OX=9606 GN=CC2D1B PE=1 SV=1;tr|H7C1U3|H7C1U3	3	2	2	2	0	0	0	0	0	0	1	0	0	0	0	0	0	0	0	1	0	0	0	0	0	0	0	0	0	0	0	1	0	0	0	0	0	0	0	0	1	0
Q5T749	Q5T749	6	6	6	Keratinocyte proline-rich protein	KPRP	sp|Q5T749|KPRP_HUMAN Keratinocyte proline-rich protein OS=Homo sapiens OX=9606 GN=KPRP PE=1 SV=1	1	6	6	6	0	0	0	0	0	0	0	0	0	0	0	0	0	3	0	3	1	4	3	0	0	0	0	0	0	0	0	0	0	0	0	0	0	0	3	0	3	1
Q5T7N0;A0A2R8Y6J3;P46777;A0A2R8Y4A2	Q5T7N0;A0A2R8Y6J3;P46777;A0A2R8Y4A2	3;3;3;2	3;3;3;2	3;3;3;2	60S ribosomal protein L5	RPL5	tr|Q5T7N0|Q5T7N0_HUMAN 60S ribosomal protein L5 (Fragment) OS=Homo sapiens OX=9606 GN=RPL5 PE=1 SV=2;tr|A0A2R8Y6J3|A0A2R8Y6J3_HUMAN 60S ribosomal protein L5 (Fragment) OS=Homo sapiens OX=9606 GN=RPL5 PE=1 SV=1;sp|P46777|RL5_HUMAN 60S ribosomal protein L5 O	4	3	3	3	0	0	0	0	0	0	0	0	0	0	0	3	0	0	0	0	0	0	0	0	0	0	0	0	0	0	0	0	0	0	0	0	3	0	0	0	0	0
Q5VSP4;P31025	Q5VSP4;P31025	1;1	1;1	1;1	Putative lipocalin 1-like protein 1;Lipocalin-1	LCN1P1;LCN1	sp|Q5VSP4|LC1L1_HUMAN Putative lipocalin 1-like protein 1 OS=Homo sapiens OX=9606 GN=LCN1P1 PE=5 SV=1;sp|P31025|LCN1_HUMAN Lipocalin-1 OS=Homo sapiens OX=9606 GN=LCN1 PE=1 SV=1	2	1	1	1	0	0	0	0	0	0	0	0	0	0	0	0	0	1	0	0	0	0	0	0	0	0	0	0	0	0	0	0	0	0	0	0	0	0	1	0	0	0
Q5VTE0;P68104;A0A087WVQ9;A0A087WV01;A0A2U3TZH3;Q05639;A6PW80;Q5JR01;A0A2R8Y660;A0A2R8Y488;A0A2R8YDN5	Q5VTE0;P68104;A0A087WVQ9;A0A087WV01;A0A2U3TZH3;Q05639	6;6;5;4;3;3;2;2;2;2;1	6;6;5;4;3;3;2;2;2;2;1	6;6;5;4;3;3;2;2;2;2;1	Putative elongation factor 1-alpha-like 3;Elongation factor 1-alpha 1;Elongation factor 1-alpha;Elongation factor 1-alpha 2	EEF1A1P5;EEF1A1;EEF1A2	sp|Q5VTE0|EF1A3_HUMAN Putative elongation factor 1-alpha-like 3 OS=Homo sapiens OX=9606 GN=EEF1A1P5 PE=5 SV=1;sp|P68104|EF1A1_HUMAN Elongation factor 1-alpha 1 OS=Homo sapiens OX=9606 GN=EEF1A1 PE=1 SV=1;tr|A0A087WVQ9|A0A087WVQ9_HUMAN Elongation factor 1-a	11	6	6	6	2	3	1	1	2	1	1	0	0	1	1	3	3	3	4	3	2	3	3	2	0	2	3	1	1	2	1	1	0	0	1	1	3	3	3	4	3	2
Q5VVC8;P62913	Q5VVC8;P62913	1;1	1;1	1;1	60S ribosomal protein L11	RPL11	tr|Q5VVC8|Q5VVC8_HUMAN 60S ribosomal protein L11 OS=Homo sapiens OX=9606 GN=RPL11 PE=1 SV=2;sp|P62913|RL11_HUMAN 60S ribosomal protein L11 OS=Homo sapiens OX=9606 GN=RPL11 PE=1 SV=2	2	1	1	1	0	0	0	0	0	0	0	0	0	0	0	1	0	0	0	0	0	0	0	0	0	0	0	0	0	0	0	0	0	0	0	0	1	0	0	0	0	0
Q5VW32;F5GXQ0;Q5VW33	Q5VW32;F5GXQ0	13;10;6	13;10;6	13;10;6	BRO1 domain-containing protein BROX	BROX	sp|Q5VW32|BROX_HUMAN BRO1 domain-containing protein BROX OS=Homo sapiens OX=9606 GN=BROX PE=1 SV=1;tr|F5GXQ0|F5GXQ0_HUMAN BRO1 domain- and CAAX motif-containing protein OS=Homo sapiens OX=9606 GN=BROX PE=1 SV=1	3	13	13	13	4	4	3	0	3	0	2	0	0	0	0	0	3	4	6	4	3	3	3	3	1	4	4	3	0	3	0	2	0	0	0	0	0	3	4	6	4	3
Q5VZR0;Q9H4G4;A0A087WUM5	Q5VZR0;Q9H4G4;A0A087WUM5	2;2;1	2;2;1	2;2;1	Golgi-associated plant pathogenesis-related protein 1	GLIPR2	tr|Q5VZR0|Q5VZR0_HUMAN Golgi-associated plant pathogenesis-related protein 1 OS=Homo sapiens OX=9606 GN=GLIPR2 PE=1 SV=1;sp|Q9H4G4|GAPR1_HUMAN Golgi-associated plant pathogenesis-related protein 1 OS=Homo sapiens OX=9606 GN=GLIPR2 PE=1 SV=3;tr|A0A087WUM5|A	3	2	2	2	0	0	0	0	0	0	1	0	0	0	0	0	0	0	0	0	1	1	0	0	0	0	0	0	0	0	0	1	0	0	0	0	0	0	0	0	0	1
Q6P1N0;K7EJY5	Q6P1N0	21;5	21;5	9;5	Coiled-coil and C2 domain-containing protein 1A	CC2D1A	sp|Q6P1N0|C2D1A_HUMAN Coiled-coil and C2 domain-containing protein 1A OS=Homo sapiens OX=9606 GN=CC2D1A PE=1 SV=1	2	21	21	9	7	8	6	5	4	2	2	0	0	0	0	0	8	9	14	8	6	9	10	7	5	7	8	6	5	4	2	2	0	0	0	0	0	8	9	14	8	6
Q6S8J3;A5A3E0;P0CG38;P0CG39;A0A0G2JRD4;A0A494C1H2;Q495V5;H0YG78;A0A0H2UH41;A0A0D9SFE8;A0A0G2JQ08;A0A087X1W7;A0A087WXQ7;A6NC16;D7UEQ8;A0A0G2JQB7;A0A0C4DH93;A0A087X187;A0A087X092;A0A087X067;A0A087WTB9;A0A0A6YYL3;A0A0G2JMU2;Q6S5H5;A6NI47;B2RU33;H3BUK9;Q6S545;A0JP26;Q86YR6	Q6S8J3;A5A3E0;P0CG38	9;8;6;4;1;1;1;1;1;1;1;1;1;1;1;1;1;1;1;1;1;1;1;1;1;1;1;1;1;1	1;1;1;1;1;1;1;1;1;1;1;1;1;1;1;1;1;1;1;1;1;1;1;1;1;1;1;1;1;1	1;1;1;1;1;1;1;1;1;1;1;1;1;1;1;1;1;1;1;1;1;1;1;1;1;1;1;1;1;1	POTE ankyrin domain family member E;POTE ankyrin domain family member F;POTE ankyrin domain family member I	POTEE;POTEF;POTEI	sp|Q6S8J3|POTEE_HUMAN POTE ankyrin domain family member E OS=Homo sapiens OX=9606 GN=POTEE PE=2 SV=3;sp|A5A3E0|POTEF_HUMAN POTE ankyrin domain family member F OS=Homo sapiens OX=9606 GN=POTEF PE=1 SV=2;sp|P0CG38|POTEI_HUMAN POTE ankyrin domain family membe	30	9	1	1	4	3	4	2	5	2	3	2	2	2	3	3	4	4	5	5	5	5	4	3	5	0	0	0	0	1	0	0	0	0	0	0	0	0	0	0	0	0
Q77YG6	Q77YG6	20	20	20			tr|Q77YG6|Q77YG6_MPMV Glycoprotein 20 OS=Mason-Pfizer monkey virus OX=11855 GN=env PE=4 SV=1	1	20	20	20	11	13	8	8	8	7	6	1	1	1	0	0	10	12	14	13	12	11	11	9	8	11	13	8	8	8	7	6	1	1	1	0	0	10	12	14	13	12
Q7L576;H0YL50;E7EW33;H7C229;E7EVJ5;Q96F07	Q7L576;H0YL50;E7EW33;H7C229;E7EVJ5;Q96F07	3;2;2;2;2;2	3;2;2;2;2;2	3;2;2;2;2;2	Cytoplasmic FMR1-interacting protein 1;Cytoplasmic FMR1-interacting protein 2	CYFIP1;CYFIP2	sp|Q7L576|CYFP1_HUMAN Cytoplasmic FMR1-interacting protein 1 OS=Homo sapiens OX=9606 GN=CYFIP1 PE=1 SV=1;tr|H0YL50|H0YL50_HUMAN Cytoplasmic FMR1-interacting protein 1 (Fragment) OS=Homo sapiens OX=9606 GN=CYFIP1 PE=1 SV=1;tr|E7EW33|E7EW33_HUMAN Cytoplasmic	6	3	3	3	2	1	0	0	1	1	0	0	0	0	0	0	0	0	0	0	0	0	0	0	0	2	1	0	0	1	1	0	0	0	0	0	0	0	0	0	0	0
Q7LBR1	Q7LBR1	2	2	2	Charged multivesicular body protein 1b	CHMP1B	sp|Q7LBR1|CHM1B_HUMAN Charged multivesicular body protein 1b OS=Homo sapiens OX=9606 GN=CHMP1B PE=1 SV=1	1	2	2	2	1	2	0	0	1	0	0	0	0	0	0	0	1	0	0	0	0	0	1	0	0	1	2	0	0	1	0	0	0	0	0	0	0	1	0	0	0	0
Q86XT2;C9JYT9	Q86XT2;C9JYT9	8;7	8;7	8;7	Vacuolar protein sorting-associated protein 37D	VPS37D	sp|Q86XT2|VP37D_HUMAN Vacuolar protein sorting-associated protein 37D OS=Homo sapiens OX=9606 GN=VPS37D PE=1 SV=2;tr|C9JYT9|C9JYT9_HUMAN Vacuolar protein sorting-associated protein 37D OS=Homo sapiens OX=9606 GN=VPS37D PE=1 SV=1	2	8	8	8	2	1	1	0	1	0	0	0	0	0	0	0	4	1	1	2	1	0	1	0	1	2	1	1	0	1	0	0	0	0	0	0	0	4	1	1	2	1
Q86YM7;Q86YM6	Q86YM7;Q86YM6	12;7	12;7	10;7	Homer protein homolog 1	HOMER1	sp|Q86YM7|HOME1_HUMAN Homer protein homolog 1 OS=Homo sapiens OX=9606 GN=HOMER1 PE=1 SV=2;tr|Q86YM6|Q86YM6_HUMAN HOMER1F OS=Homo sapiens OX=9606 GN=HOMER1 PE=1 SV=1	2	12	12	10	1	0	0	0	0	0	0	0	0	0	0	0	6	5	8	6	4	3	5	2	1	1	0	0	0	0	0	0	0	0	0	0	0	6	5	8	6	4
Q8IWA5;K7EPV6;K7ESF5	Q8IWA5;K7EPV6;K7ESF5	2;1;1	2;1;1	2;1;1	Choline transporter-like protein 2	SLC44A2	sp|Q8IWA5|CTL2_HUMAN Choline transporter-like protein 2 OS=Homo sapiens OX=9606 GN=SLC44A2 PE=1 SV=3;tr|K7EPV6|K7EPV6_HUMAN Choline transporter-like protein 2 (Fragment) OS=Homo sapiens OX=9606 GN=SLC44A2 PE=1 SV=1;tr|K7ESF5|K7ESF5_HUMAN Choline transporte	3	2	2	2	0	0	0	0	0	0	0	0	0	0	0	0	0	2	1	0	0	0	0	0	0	0	0	0	0	0	0	0	0	0	0	0	0	0	2	1	0	0
Q8NBT0	Q8NBT0	1	1	1	POC1 centriolar protein homolog A	POC1A	sp|Q8NBT0|POC1A_HUMAN POC1 centriolar protein homolog A OS=Homo sapiens OX=9606 GN=POC1A PE=1 SV=2	1	1	1	1	0	0	0	0	0	0	0	0	0	0	0	0	0	1	1	0	0	0	0	0	0	0	0	0	0	0	0	0	0	0	0	0	0	0	1	1	0	0
Q8NDC0	Q8NDC0	1	1	1	MAPK-interacting and spindle-stabilizing protein-like	MAPK1IP1L	sp|Q8NDC0|MISSL_HUMAN MAPK-interacting and spindle-stabilizing protein-like OS=Homo sapiens OX=9606 GN=MAPK1IP1L PE=1 SV=4	1	1	1	1	0	1	0	0	0	0	0	0	0	0	0	0	0	0	0	0	0	0	0	0	0	0	1	0	0	0	0	0	0	0	0	0	0	0	0	0	0	0
Q8WUM4;A0A3B3IT07;C9IZF9;F8WEQ7;F8WBR8;F8WDK9	Q8WUM4	68;16;11;8;8;6	68;16;11;8;8;6	68;16;11;8;8;6	Programmed cell death 6-interacting protein	PDCD6IP	sp|Q8WUM4|PDC6I_HUMAN Programmed cell death 6-interacting protein OS=Homo sapiens OX=9606 GN=PDCD6IP PE=1 SV=1	6	68	68	68	29	40	27	21	32	23	18	2	1	3	3	5	32	38	40	35	30	29	31	31	26	29	40	27	21	32	23	18	2	1	3	3	5	32	38	40	35	30
Q8WUY9	Q8WUY9	1	1	1	DEP domain-containing protein 1B	DEPDC1B	sp|Q8WUY9|DEP1B_HUMAN DEP domain-containing protein 1B OS=Homo sapiens OX=9606 GN=DEPDC1B PE=1 SV=2	1	1	1	1	0	0	0	0	0	0	0	0	0	0	0	0	0	0	0	0	1	0	0	0	0	0	0	0	0	0	0	0	0	0	0	0	0	0	0	0	0	1
Q8WV92;B8ZZL5;H7C3Q6;F8WED5;A0A1W2PP14	Q8WV92;B8ZZL5;H7C3Q6	7;5;5;2;2	7;5;5;2;2	7;5;5;2;2	MIT domain-containing protein 1	MITD1	sp|Q8WV92|MITD1_HUMAN MIT domain-containing protein 1 OS=Homo sapiens OX=9606 GN=MITD1 PE=1 SV=1;tr|B8ZZL5|B8ZZL5_HUMAN MIT domain-containing protein 1 (Fragment) OS=Homo sapiens OX=9606 GN=MITD1 PE=1 SV=1;tr|H7C3Q6|H7C3Q6_HUMAN MIT domain-containing prote	5	7	7	7	2	2	1	1	0	0	0	0	0	0	0	0	3	3	4	4	3	2	2	1	2	2	2	1	1	0	0	0	0	0	0	0	0	3	3	4	4	3
Q8WWI5	Q8WWI5	4	4	4	Choline transporter-like protein 1	SLC44A1	sp|Q8WWI5|CTL1_HUMAN Choline transporter-like protein 1 OS=Homo sapiens OX=9606 GN=SLC44A1 PE=1 SV=1	1	4	4	4	1	1	1	0	0	0	1	0	0	0	0	0	2	1	4	2	3	3	2	2	1	1	1	1	0	0	0	1	0	0	0	0	0	2	1	4	2	3
Q8WWK9;C9J7Y4	Q8WWK9	3;1	3;1	3;1	Cytoskeleton-associated protein 2	CKAP2	sp|Q8WWK9|CKAP2_HUMAN Cytoskeleton-associated protein 2 OS=Homo sapiens OX=9606 GN=CKAP2 PE=1 SV=1	2	3	3	3	1	1	0	0	0	0	0	0	0	0	0	0	0	2	1	0	2	0	0	0	0	1	1	0	0	0	0	0	0	0	0	0	0	0	2	1	0	2
Q92783;C9J1E5;O75886	Q92783	3;1;1	3;1;1	3;1;1	Signal transducing adapter molecule 1	STAM	sp|Q92783|STAM1_HUMAN Signal transducing adapter molecule 1 OS=Homo sapiens OX=9606 GN=STAM PE=1 SV=3	3	3	3	3	1	0	0	0	0	0	0	0	0	0	0	2	0	0	0	0	0	0	0	0	0	1	0	0	0	0	0	0	0	0	0	0	2	0	0	0	0	0
Q969E2;K7EJJ4;C9JWM2	Q969E2;K7EJJ4;C9JWM2	2;1;1	2;1;1	2;1;1	Secretory carrier-associated membrane protein 4	SCAMP4	sp|Q969E2|SCAM4_HUMAN Secretory carrier-associated membrane protein 4 OS=Homo sapiens OX=9606 GN=SCAMP4 PE=1 SV=1;tr|K7EJJ4|K7EJJ4_HUMAN Secretory carrier-associated membrane protein (Fragment) OS=Homo sapiens OX=9606 GN=SCAMP4 PE=1 SV=2;tr|C9JWM2|C9JWM2_H	3	2	2	2	1	1	1	0	1	0	0	0	0	0	0	0	0	1	1	0	0	0	0	0	0	1	1	1	0	1	0	0	0	0	0	0	0	0	1	1	0	0
Q969P0;C9J8Z4	Q969P0;C9J8Z4	17;12	17;12	17;12	Immunoglobulin superfamily member 8	IGSF8	sp|Q969P0|IGSF8_HUMAN Immunoglobulin superfamily member 8 OS=Homo sapiens OX=9606 GN=IGSF8 PE=1 SV=1;tr|C9J8Z4|C9J8Z4_HUMAN Immunoglobulin superfamily member 8 (Fragment) OS=Homo sapiens OX=9606 GN=IGSF8 PE=1 SV=1	2	17	17	17	9	11	5	8	5	4	3	0	0	0	0	2	8	6	12	11	8	7	8	8	5	9	11	5	8	5	4	3	0	0	0	0	2	8	6	12	11	8
Q96CF2	Q96CF2	4	3	3	Charged multivesicular body protein 4c	CHMP4C	sp|Q96CF2|CHM4C_HUMAN Charged multivesicular body protein 4c OS=Homo sapiens OX=9606 GN=CHMP4C PE=1 SV=1	1	4	3	3	2	3	0	1	0	0	0	0	0	0	0	0	1	2	2	0	0	0	0	1	0	2	2	0	1	0	0	0	0	0	0	0	0	1	2	2	0	0
Q96EY5;E9PQA6;E9PLZ8;M0QZK6;E9PLL0;E9PJW8	Q96EY5;E9PQA6;E9PLZ8;M0QZK6	10;8;6;5;4;1	10;8;6;5;4;1	10;8;6;5;4;1	Multivesicular body subunit 12A	MVB12A	sp|Q96EY5|MB12A_HUMAN Multivesicular body subunit 12A OS=Homo sapiens OX=9606 GN=MVB12A PE=1 SV=1;tr|E9PQA6|E9PQA6_HUMAN Multivesicular body subunit 12A OS=Homo sapiens OX=9606 GN=MVB12A PE=1 SV=1;tr|E9PLZ8|E9PLZ8_HUMAN ESCRT-I complex subunit MVB12A (Frag	6	10	10	10	3	5	3	1	2	0	0	0	0	0	0	0	3	4	5	1	2	2	1	0	1	3	5	3	1	2	0	0	0	0	0	0	0	3	4	5	1	2
Q96H20;D6RJ86;D6RFY6;H0Y8S5;D6RBI1	Q96H20;D6RJ86;D6RFY6;H0Y8S5;D6RBI1	4;3;3;2;2	4;3;3;2;2	4;3;3;2;2	Vacuolar-sorting protein SNF8	SNF8	sp|Q96H20|SNF8_HUMAN Vacuolar-sorting protein SNF8 OS=Homo sapiens OX=9606 GN=SNF8 PE=1 SV=1;tr|D6RJ86|D6RJ86_HUMAN ESCRT-II complex subunit VPS22 OS=Homo sapiens OX=9606 GN=SNF8 PE=1 SV=1;tr|D6RFY6|D6RFY6_HUMAN ESCRT-II complex subunit VPS22 OS=Homo sapie	5	4	4	4	0	0	0	0	0	0	0	0	0	0	0	0	1	4	2	2	2	3	1	1	1	0	0	0	0	0	0	0	0	0	0	0	0	1	4	2	2	2
Q96P48	Q96P48	1	1	1	Arf-GAP with Rho-GAP domain, ANK repeat and PH domain-containing protein 1	ARAP1	sp|Q96P48|ARAP1_HUMAN Arf-GAP with Rho-GAP domain, ANK repeat and PH domain-containing protein 1 OS=Homo sapiens OX=9606 GN=ARAP1 PE=1 SV=3	1	1	1	1	0	1	0	0	0	0	0	0	0	0	0	0	0	0	0	0	0	0	0	0	0	0	1	0	0	0	0	0	0	0	0	0	0	0	0	0	0	0
Q96P63	Q96P63	1	1	1	Serpin B12	SERPINB12	sp|Q96P63|SPB12_HUMAN Serpin B12 OS=Homo sapiens OX=9606 GN=SERPINB12 PE=1 SV=1	1	1	1	1	0	0	0	0	0	0	0	0	0	0	0	1	1	0	0	0	0	1	0	1	0	0	0	0	0	0	0	0	0	0	0	0	1	1	0	0	0	0
Q96QD8;F8VUY8	Q96QD8;F8VUY8	2;1	2;1	2;1	Sodium-coupled neutral amino acid transporter 2	SLC38A2	sp|Q96QD8|S38A2_HUMAN Sodium-coupled neutral amino acid transporter 2 OS=Homo sapiens OX=9606 GN=SLC38A2 PE=1 SV=2;tr|F8VUY8|F8VUY8_HUMAN Sodium-coupled neutral amino acid transporter 2 OS=Homo sapiens OX=9606 GN=SLC38A2 PE=1 SV=1	2	2	2	2	0	0	1	0	1	0	0	0	0	0	0	0	0	0	1	0	0	0	0	0	0	0	0	1	0	1	0	0	0	0	0	0	0	0	0	1	0	0
Q96RF0	Q96RF0	4	4	4	Sorting nexin-18	SNX18	sp|Q96RF0|SNX18_HUMAN Sorting nexin-18 OS=Homo sapiens OX=9606 GN=SNX18 PE=1 SV=2	1	4	4	4	1	0	0	0	0	0	0	0	0	0	0	0	0	1	2	0	1	1	0	0	0	1	0	0	0	0	0	0	0	0	0	0	0	0	1	2	0	1
Q99698	Q99698	1	1	1	Lysosomal-trafficking regulator	LYST	sp|Q99698|LYST_HUMAN Lysosomal-trafficking regulator OS=Homo sapiens OX=9606 GN=LYST PE=1 SV=3	1	1	1	1	1	0	0	1	0	1	1	0	0	0	0	0	1	1	0	0	0	1	0	1	1	1	0	0	1	0	1	1	0	0	0	0	0	1	1	0	0	0
Q99808	Q99808	5	5	5	Equilibrative nucleoside transporter 1	SLC29A1	sp|Q99808|S29A1_HUMAN Equilibrative nucleoside transporter 1 OS=Homo sapiens OX=9606 GN=SLC29A1 PE=1 SV=3	1	5	5	5	0	0	0	1	1	0	0	0	0	0	0	0	3	4	5	4	3	3	1	2	0	0	0	0	1	1	0	0	0	0	0	0	0	3	4	5	4	3
Q99816;F5H442;J3QRU6;J3QKS4	Q99816;F5H442	15;14;2;2	15;14;2;2	15;14;2;2	Tumor susceptibility gene 101 protein	TSG101	sp|Q99816|TS101_HUMAN Tumor susceptibility gene 101 protein OS=Homo sapiens OX=9606 GN=TSG101 PE=1 SV=2;tr|F5H442|F5H442_HUMAN Tumor susceptibility gene 101 protein OS=Homo sapiens OX=9606 GN=TSG101 PE=1 SV=1	4	15	15	15	7	7	6	5	5	4	3	2	1	0	0	0	10	8	8	8	8	7	8	5	7	7	7	6	5	5	4	3	2	1	0	0	0	10	8	8	8	8
Q99961;M0QYE0;M0R0I3;Q99962;M0R2K6	Q99961;M0QYE0;M0R0I3	10;6;6;2;1	10;6;6;2;1	10;6;6;2;1	Endophilin-A2	SH3GL1	sp|Q99961|SH3G1_HUMAN Endophilin-A2 OS=Homo sapiens OX=9606 GN=SH3GL1 PE=1 SV=1;tr|M0QYE0|M0QYE0_HUMAN Endophilin-A2 (Fragment) OS=Homo sapiens OX=9606 GN=SH3GL1 PE=1 SV=8;tr|M0R0I3|M0R0I3_HUMAN Endophilin-A2 (Fragment) OS=Homo sapiens OX=9606 GN=SH3GL1 PE	5	10	10	10	4	2	1	0	1	1	0	0	0	0	0	0	4	5	4	5	3	4	3	3	1	4	2	1	0	1	1	0	0	0	0	0	0	4	5	4	5	3
Q99963	Q99963	4	4	4	Endophilin-A3	SH3GL3	sp|Q99963|SH3G3_HUMAN Endophilin-A3 OS=Homo sapiens OX=9606 GN=SH3GL3 PE=1 SV=1	1	4	4	4	0	0	0	0	0	0	0	0	0	0	0	0	2	2	3	2	2	0	1	0	1	0	0	0	0	0	0	0	0	0	0	0	0	2	2	3	2	2
Q9BRG1;K7EKV4;K7EP45;K7ENE3	Q9BRG1;K7EKV4	7;4;3;2	7;4;3;2	7;4;3;2	Vacuolar protein-sorting-associated protein 25	VPS25	sp|Q9BRG1|VPS25_HUMAN Vacuolar protein-sorting-associated protein 25 OS=Homo sapiens OX=9606 GN=VPS25 PE=1 SV=1;tr|K7EKV4|K7EKV4_HUMAN ESCRT-II complex subunit VPS25 (Fragment) OS=Homo sapiens OX=9606 GN=VPS25 PE=1 SV=1	4	7	7	7	3	0	0	0	0	0	0	0	0	0	0	0	3	5	5	2	4	3	1	3	3	3	0	0	0	0	0	0	0	0	0	0	0	3	5	5	2	4
Q9BT67	Q9BT67	1	1	1	NEDD4 family-interacting protein 1	NDFIP1	sp|Q9BT67|NFIP1_HUMAN NEDD4 family-interacting protein 1 OS=Homo sapiens OX=9606 GN=NDFIP1 PE=1 SV=1	1	1	1	1	0	1	0	0	0	0	0	0	0	0	0	0	0	0	0	0	0	0	0	0	0	0	1	0	0	0	0	0	0	0	0	0	0	0	0	0	0	0
Q9BWD3;A6ZKI3;Q17RB0	Q9BWD3;A6ZKI3	4;2;1	4;2;1	4;2;1	Protein FAM127B;Protein FAM127A	FAM127B;FAM127A	sp|Q9BWD3|RTL8A_HUMAN Retrotransposon Gag-like protein 8A OS=Homo sapiens OX=9606 GN=RTL8A PE=1 SV=3;sp|A6ZKI3|RTL8C_HUMAN Retrotransposon Gag-like protein 8C OS=Homo sapiens OX=9606 GN=RTL8C PE=1 SV=1	3	4	4	4	0	0	0	0	0	0	0	0	0	0	0	0	1	2	3	0	1	1	2	0	0	0	0	0	0	0	0	0	0	0	0	0	0	1	2	3	0	1
Q9BX67	Q9BX67	2	2	2	Junctional adhesion molecule C	JAM3	sp|Q9BX67|JAM3_HUMAN Junctional adhesion molecule C OS=Homo sapiens OX=9606 GN=JAM3 PE=1 SV=1	1	2	2	2	0	0	0	0	0	0	0	0	0	0	0	0	1	0	2	0	0	0	1	1	0	0	0	0	0	0	0	0	0	0	0	0	0	1	0	2	0	0
Q9BY43;H0YIN6;E9PQI5;E9PQ80;E9PSI1	Q9BY43;H0YIN6;E9PQI5;E9PQ80;E9PSI1	2;1;1;1;1	2;1;1;1;1	2;1;1;1;1	Charged multivesicular body protein 4a	CHMP4A	sp|Q9BY43|CHM4A_HUMAN Charged multivesicular body protein 4a OS=Homo sapiens OX=9606 GN=CHMP4A PE=1 SV=3;tr|H0YIN6|H0YIN6_HUMAN Charged multivesicular body protein 4a OS=Homo sapiens OX=9606 GN=CHMP4A PE=1 SV=2;tr|E9PQI5|E9PQI5_HUMAN Charged multivesicular	5	2	2	2	1	1	0	0	0	0	0	0	0	0	0	0	1	1	1	1	1	0	1	1	0	1	1	0	0	0	0	0	0	0	0	0	0	1	1	1	1	1
Q9H0H5;F8VRD2;F8W1E5;H0YIK5	Q9H0H5;F8VRD2	3;2;1;1	3;2;1;1	3;2;1;1	Rac GTPase-activating protein 1	RACGAP1	sp|Q9H0H5|RGAP1_HUMAN Rac GTPase-activating protein 1 OS=Homo sapiens OX=9606 GN=RACGAP1 PE=1 SV=1;tr|F8VRD2|F8VRD2_HUMAN Rac GTPase-activating protein 1 (Fragment) OS=Homo sapiens OX=9606 GN=RACGAP1 PE=1 SV=8	4	3	3	3	2	2	0	0	0	0	1	0	0	0	0	0	0	0	0	0	0	0	0	0	0	2	2	0	0	0	0	1	0	0	0	0	0	0	0	0	0	0
Q9H223	Q9H223	17	17	14	EH domain-containing protein 4	EHD4	sp|Q9H223|EHD4_HUMAN EH domain-containing protein 4 OS=Homo sapiens OX=9606 GN=EHD4 PE=1 SV=1	1	17	17	14	3	5	4	5	5	2	3	0	0	0	0	0	9	8	12	8	10	5	5	5	3	3	5	4	5	5	2	3	0	0	0	0	0	9	8	12	8	10
Q9H3S7	Q9H3S7	1	1	1	Tyrosine-protein phosphatase non-receptor type 23	PTPN23	sp|Q9H3S7|PTN23_HUMAN Tyrosine-protein phosphatase non-receptor type 23 OS=Homo sapiens OX=9606 GN=PTPN23 PE=1 SV=1	1	1	1	1	1	0	0	0	0	0	0	0	0	0	0	0	0	0	0	0	0	0	0	0	0	1	0	0	0	0	0	0	0	0	0	0	0	0	0	0	0	0
Q9H444	Q9H444	11	11	10	Charged multivesicular body protein 4b	CHMP4B	sp|Q9H444|CHM4B_HUMAN Charged multivesicular body protein 4b OS=Homo sapiens OX=9606 GN=CHMP4B PE=1 SV=1	1	11	11	10	5	7	7	3	4	3	4	1	2	0	0	0	3	4	4	2	2	3	3	2	2	5	7	7	3	4	3	4	1	2	0	0	0	3	4	4	2	2
Q9H7P6;F8W922	Q9H7P6;F8W922	5;3	5;3	5;3	Multivesicular body subunit 12B	MVB12B	sp|Q9H7P6|MB12B_HUMAN Multivesicular body subunit 12B OS=Homo sapiens OX=9606 GN=MVB12B PE=1 SV=2;tr|F8W922|F8W922_HUMAN Multivesicular body subunit 12B (Fragment) OS=Homo sapiens OX=9606 GN=MVB12B PE=1 SV=1	2	5	5	5	0	2	1	1	1	0	0	0	0	0	0	0	2	2	1	1	1	1	1	0	1	0	2	1	1	1	0	0	0	0	0	0	0	2	2	1	1	1
Q9H9H4;F5H4M0;F5H1F6	Q9H9H4;F5H4M0	15;11;7	15;11;7	15;11;7	Vacuolar protein sorting-associated protein 37B	VPS37B	sp|Q9H9H4|VP37B_HUMAN Vacuolar protein sorting-associated protein 37B OS=Homo sapiens OX=9606 GN=VPS37B PE=1 SV=1;tr|F5H4M0|F5H4M0_HUMAN Vacuolar protein sorting-associated protein 37B (Fragment) OS=Homo sapiens OX=9606 GN=VPS37B PE=1 SV=1	3	15	15	15	5	6	2	0	2	0	1	0	0	0	0	0	6	9	8	4	4	4	3	5	4	5	6	2	0	2	0	1	0	0	0	0	0	6	9	8	4	4
Q9HCE1;Q5JR04	Q9HCE1;Q5JR04	28;27	28;27	28;27	Putative helicase MOV-10	MOV10	sp|Q9HCE1|MOV10_HUMAN Helicase MOV-10 OS=Homo sapiens OX=9606 GN=MOV10 PE=1 SV=2;tr|Q5JR04|Q5JR04_HUMAN RNA helicase OS=Homo sapiens OX=9606 GN=MOV10 PE=1 SV=1	2	28	28	28	7	1	2	1	2	1	2	0	0	0	0	0	14	15	17	13	17	10	11	12	6	7	1	2	1	2	1	2	0	0	0	0	0	14	15	17	13	17
Q9NQP5;A6PVK5;P00488	Q9NQP5;A6PVK5;P00488	1;1;1	1;1;1	1;1;1	Coagulation factor XIII A chain	F13A1	tr|Q9NQP5|Q9NQP5_HUMAN Coagulation factor XIII A chain (Fragment) OS=Homo sapiens OX=9606 GN=F13A1 PE=1 SV=2;tr|A6PVK5|A6PVK5_HUMAN Coagulation factor XIII A chain (Fragment) OS=Homo sapiens OX=9606 GN=F13A1 PE=1 SV=9;sp|P00488|F13A_HUMAN Coagulation facto	3	1	1	1	0	0	0	0	0	0	0	0	0	0	0	1	1	0	0	0	0	0	0	0	0	0	0	0	0	0	0	0	0	0	0	0	1	1	0	0	0	0
Q9NRX5	Q9NRX5	2	2	2	Serine incorporator 1	SERINC1	sp|Q9NRX5|SERC1_HUMAN Serine incorporator 1 OS=Homo sapiens OX=9606 GN=SERINC1 PE=1 SV=1	1	2	2	2	1	0	1	0	0	0	0	0	0	0	0	0	0	1	1	0	1	1	0	0	0	1	0	1	0	0	0	0	0	0	0	0	0	0	1	1	0	1
Q9NSB8;H0YNR9;M0R2T8;M0QZN1;M0R2U7;Q9NSC5	Q9NSB8	9;2;1;1;1;1	7;2;0;0;0;0	7;2;0;0;0;0	Homer protein homolog 2	HOMER2	sp|Q9NSB8|HOME2_HUMAN Homer protein homolog 2 OS=Homo sapiens OX=9606 GN=HOMER2 PE=1 SV=1	6	9	7	7	3	3	1	1	2	2	0	0	0	0	0	0	3	5	4	4	2	2	2	1	0	3	3	1	1	2	2	0	0	0	0	0	0	1	4	3	2	1
Q9NUQ3	Q9NUQ3	12	11	11	Gamma-taxilin	TXLNG	sp|Q9NUQ3|TXLNG_HUMAN Gamma-taxilin OS=Homo sapiens OX=9606 GN=TXLNG PE=1 SV=2	1	12	11	11	2	1	1	1	0	1	2	1	0	0	0	0	6	9	7	6	6	5	6	5	2	2	1	0	1	0	1	1	0	0	0	0	0	6	9	7	6	6
Q9NVZ3;D6RAN6;F6SKB8;H0Y970;D6RB24	Q9NVZ3;D6RAN6;F6SKB8	3;2;2;1;1	3;2;2;1;1	3;2;2;1;1	Adaptin ear-binding coat-associated protein 2	NECAP2	sp|Q9NVZ3|NECP2_HUMAN Adaptin ear-binding coat-associated protein 2 OS=Homo sapiens OX=9606 GN=NECAP2 PE=1 SV=1;tr|D6RAN6|D6RAN6_HUMAN Adaptin ear-binding coat-associated protein 2 OS=Homo sapiens OX=9606 GN=NECAP2 PE=1 SV=1;tr|F6SKB8|F6SKB8_HUMAN Adaptin	5	3	3	3	1	1	0	1	0	1	1	0	0	0	0	0	1	1	1	0	0	0	1	0	1	1	1	0	1	0	1	1	0	0	0	0	0	1	1	1	0	0
Q9NZI8;F8W930;O00425;Q9Y6M1	Q9NZI8	3;1;1;1	3;1;1;1	3;1;1;1	Insulin-like growth factor 2 mRNA-binding protein 1	IGF2BP1	sp|Q9NZI8|IF2B1_HUMAN Insulin-like growth factor 2 mRNA-binding protein 1 OS=Homo sapiens OX=9606 GN=IGF2BP1 PE=1 SV=2	4	3	3	3	3	2	1	0	0	0	1	0	0	0	0	0	1	1	2	2	1	1	0	0	0	3	2	1	0	0	0	1	0	0	0	0	0	1	1	2	2	1
Q9NZN3	Q9NZN3	10	1	1	EH domain-containing protein 3	EHD3	sp|Q9NZN3|EHD3_HUMAN EH domain-containing protein 3 OS=Homo sapiens OX=9606 GN=EHD3 PE=1 SV=2	1	10	1	1	1	1	0	0	0	0	1	0	0	0	0	0	3	4	5	2	5	4	0	1	1	0	0	0	0	0	0	1	0	0	0	0	0	0	0	0	0	0
Q9NZT1	Q9NZT1	2	2	2	Calmodulin-like protein 5	CALML5	sp|Q9NZT1|CALL5_HUMAN Calmodulin-like protein 5 OS=Homo sapiens OX=9606 GN=CALML5 PE=1 SV=2	1	2	2	2	0	0	0	0	0	0	0	0	0	0	0	0	0	0	1	1	0	0	1	0	0	0	0	0	0	0	0	0	0	0	0	0	0	0	0	1	1	0
Q9NZZ3	Q9NZZ3	6	6	6	Charged multivesicular body protein 5	CHMP5	sp|Q9NZZ3|CHMP5_HUMAN Charged multivesicular body protein 5 OS=Homo sapiens OX=9606 GN=CHMP5 PE=1 SV=1	1	6	6	6	4	4	0	1	0	1	1	0	0	0	0	0	1	1	4	1	0	2	1	2	0	4	4	0	1	0	1	1	0	0	0	0	0	1	1	4	1	0
Q9P2B2	Q9P2B2	31	31	31	Prostaglandin F2 receptor negative regulator	PTGFRN	sp|Q9P2B2|FPRP_HUMAN Prostaglandin F2 receptor negative regulator OS=Homo sapiens OX=9606 GN=PTGFRN PE=1 SV=2	1	31	31	31	13	8	6	4	2	1	0	1	1	1	0	0	18	20	22	19	18	15	15	14	9	13	8	6	4	2	1	0	1	1	1	0	0	18	20	22	19	18
Q9UBC2;M0R165;M0R2S2;M0R1V5;M0R3I1;K7EJR2;M0R330;M0QX30	Q9UBC2;M0R165;M0R2S2	53;51;31;10;10;7;7;6	53;51;31;10;10;7;7;6	53;51;31;10;10;7;7;6	Epidermal growth factor receptor substrate 15-like 1	EPS15L1	sp|Q9UBC2|EP15R_HUMAN Epidermal growth factor receptor substrate 15-like 1 OS=Homo sapiens OX=9606 GN=EPS15L1 PE=1 SV=1;tr|M0R165|M0R165_HUMAN Epidermal growth factor receptor substrate 15-like 1 OS=Homo sapiens OX=9606 GN=EPS15L1 PE=1 SV=1;tr|M0R2S2|M0R2S	8	53	53	53	23	23	13	7	16	9	7	2	3	0	0	0	25	30	32	27	27	23	24	22	15	23	23	13	7	16	9	7	2	3	0	0	0	25	30	32	27	27
Q9UBU9;E9PIN3;B4E227;E9PQA4;E9PLA7	Q9UBU9;E9PIN3	9;8;3;2;1	9;8;3;2;1	9;8;3;2;1	Nuclear RNA export factor 1	NXF1	sp|Q9UBU9|NXF1_HUMAN Nuclear RNA export factor 1 OS=Homo sapiens OX=9606 GN=NXF1 PE=1 SV=1;tr|E9PIN3|E9PIN3_HUMAN Nuclear RNA export factor 1 (Fragment) OS=Homo sapiens OX=9606 GN=NXF1 PE=1 SV=1	5	9	9	9	4	5	4	3	0	0	0	0	0	0	0	0	0	0	0	0	0	0	0	0	0	4	5	4	3	0	0	0	0	0	0	0	0	0	0	0	0	0
Q9UHD9;Q9UMX0	Q9UHD9	6;1	6;1	6;1	Ubiquilin-2	UBQLN2	sp|Q9UHD9|UBQL2_HUMAN Ubiquilin-2 OS=Homo sapiens OX=9606 GN=UBQLN2 PE=1 SV=2	2	6	6	6	1	1	0	0	0	0	0	0	0	0	0	0	2	3	4	1	3	1	0	1	0	1	1	0	0	0	0	0	0	0	0	0	0	2	3	4	1	3
Q9UJX2;D6RBY8;D6RCF8;H0Y936	Q9UJX2	11;1;1;1	11;1;1;1	11;1;1;1	Cell division cycle protein 23 homolog	CDC23	sp|Q9UJX2|CDC23_HUMAN Cell division cycle protein 23 homolog OS=Homo sapiens OX=9606 GN=CDC23 PE=1 SV=3	4	11	11	11	2	1	0	0	0	0	0	0	0	0	0	0	2	4	5	4	4	2	1	3	0	2	1	0	0	0	0	0	0	0	0	0	0	2	4	5	4	4
Q9UJX3	Q9UJX3	1	1	1	Anaphase-promoting complex subunit 7	ANAPC7	sp|Q9UJX3|APC7_HUMAN Anaphase-promoting complex subunit 7 OS=Homo sapiens OX=9606 GN=ANAPC7 PE=1 SV=4	1	1	1	1	0	0	0	0	0	0	0	0	0	0	0	0	0	1	0	0	0	0	0	0	0	0	0	0	0	0	0	0	0	0	0	0	0	0	1	0	0	0
Q9UK41;E9PQR7;E9PM90;E9PR04;E9PLM9	Q9UK41;E9PQR7;E9PM90	13;12;7;4;2	13;12;7;4;2	13;12;7;4;2	Vacuolar protein sorting-associated protein 28 homolog	VPS28	sp|Q9UK41|VPS28_HUMAN Vacuolar protein sorting-associated protein 28 homolog OS=Homo sapiens OX=9606 GN=VPS28 PE=1 SV=1;tr|E9PQR7|E9PQR7_HUMAN Vacuolar protein sorting-associated protein 28 homolog (Fragment) OS=Homo sapiens OX=9606 GN=VPS28 PE=1 SV=1;tr|E	5	13	13	13	4	5	4	3	4	3	2	0	0	0	0	0	9	9	10	9	9	8	7	6	5	4	5	4	3	4	3	2	0	0	0	0	0	9	9	10	9	9
Q9UKS6;A0A0C4DGG1;E9PIY1;E9PJ75;E9PNM9;E9PJ33;H0YDM6	Q9UKS6;A0A0C4DGG1;E9PIY1	11;10;7;4;4;2;2	11;10;7;4;4;2;2	11;10;7;4;4;2;2	Protein kinase C and casein kinase substrate in neurons protein 3	PACSIN3	sp|Q9UKS6|PACN3_HUMAN Protein kinase C and casein kinase substrate in neurons protein 3 OS=Homo sapiens OX=9606 GN=PACSIN3 PE=1 SV=2;tr|A0A0C4DGG1|A0A0C4DGG1_HUMAN Protein kinase C and casein kinase substrate in neurons protein 3 (Fragment) OS=Homo sapiens	7	11	11	11	6	3	3	1	1	0	0	0	0	0	0	0	6	6	7	5	5	2	5	5	3	6	3	3	1	1	0	0	0	0	0	0	0	6	6	7	5	5
Q9UL25	Q9UL25	1	1	1	Ras-related protein Rab-21	RAB21	sp|Q9UL25|RAB21_HUMAN Ras-related protein Rab-21 OS=Homo sapiens OX=9606 GN=RAB21 PE=1 SV=3	1	1	1	1	0	0	0	0	0	0	0	0	0	0	0	0	0	1	0	1	0	0	0	0	0	0	0	0	0	0	0	0	0	0	0	0	0	0	1	0	1	0
Q9UN37;I3L4J1	Q9UN37;I3L4J1	10;8	7;5	7;5	Vacuolar protein sorting-associated protein 4A	VPS4A	sp|Q9UN37|VPS4A_HUMAN Vacuolar protein sorting-associated protein 4A OS=Homo sapiens OX=9606 GN=VPS4A PE=1 SV=1;tr|I3L4J1|I3L4J1_HUMAN Vesicle-fusing ATPase (Fragment) OS=Homo sapiens OX=9606 PE=1 SV=3	2	10	7	7	4	4	2	1	3	2	2	0	0	0	0	1	2	4	5	2	2	1	2	4	1	2	2	1	1	2	1	1	0	0	0	0	0	1	3	4	1	1
Q9UNF0;A0A0U1RR22;B0QYG7;B0QYG8;H0Y923	Q9UNF0;A0A0U1RR22	19;17;6;6;1	19;17;6;6;1	19;17;6;6;1	Protein kinase C and casein kinase substrate in neurons protein 2	PACSIN2	sp|Q9UNF0|PACN2_HUMAN Protein kinase C and casein kinase substrate in neurons protein 2 OS=Homo sapiens OX=9606 GN=PACSIN2 PE=1 SV=2;tr|A0A0U1RR22|A0A0U1RR22_HUMAN Protein kinase C and casein kinase substrate in neurons protein 2 (Fragment) OS=Homo sapiens	5	19	19	19	9	8	3	2	1	0	0	0	0	0	0	0	10	13	12	10	11	10	7	4	6	9	8	3	2	1	0	0	0	0	0	0	0	10	13	12	10	11
Q9Y2A7	Q9Y2A7	1	1	1	Nck-associated protein 1	NCKAP1	sp|Q9Y2A7|NCKP1_HUMAN Nck-associated protein 1 OS=Homo sapiens OX=9606 GN=NCKAP1 PE=1 SV=1	1	1	1	1	0	1	0	0	0	0	0	0	0	0	0	0	0	0	0	0	0	0	0	0	0	0	1	0	0	0	0	0	0	0	0	0	0	0	0	0	0	0
Q9Y3E7	Q9Y3E7	3	3	3	Charged multivesicular body protein 3	CHMP3	sp|Q9Y3E7|CHMP3_HUMAN Charged multivesicular body protein 3 OS=Homo sapiens OX=9606 GN=CHMP3 PE=1 SV=3	1	3	3	3	0	1	0	0	0	0	0	0	0	0	0	0	1	2	1	0	1	1	0	1	0	0	1	0	0	0	0	0	0	0	0	0	0	1	2	1	0	1
Q9Y3I0	Q9Y3I0	2	2	2	tRNA-splicing ligase RtcB homolog	RTCB	sp|Q9Y3I0|RTCB_HUMAN RNA-splicing ligase RtcB homolog OS=Homo sapiens OX=9606 GN=RTCB PE=1 SV=1	1	2	2	2	1	1	0	0	0	0	0	0	0	0	0	0	0	0	0	0	1	0	0	0	0	1	1	0	0	0	0	0	0	0	0	0	0	0	0	0	0	1
Q9Y490	Q9Y490	4	4	4	Talin-1	TLN1	sp|Q9Y490|TLN1_HUMAN Talin-1 OS=Homo sapiens OX=9606 GN=TLN1 PE=1 SV=3	1	4	4	4	1	1	0	0	1	0	4	0	0	0	0	0	0	0	0	0	0	0	0	0	0	1	1	0	0	1	0	4	0	0	0	0	0	0	0	0	0	0
Q9Y5K6	Q9Y5K6	13	13	13	CD2-associated protein	CD2AP	sp|Q9Y5K6|CD2AP_HUMAN CD2-associated protein OS=Homo sapiens OX=9606 GN=CD2AP PE=1 SV=1	1	13	13	13	5	3	6	1	0	0	0	0	0	0	0	0	1	4	8	4	3	2	1	1	3	5	3	6	1	0	0	0	0	0	0	0	0	1	4	8	4	3
Q9Y5V3;Q5H907;Q5H909;Q9UNF1;Q96JG8	Q9Y5V3	4;1;1;1;1	4;1;1;1;1	4;1;1;1;1	Melanoma-associated antigen D1	MAGED1	sp|Q9Y5V3|MAGD1_HUMAN Melanoma-associated antigen D1 OS=Homo sapiens OX=9606 GN=MAGED1 PE=1 SV=3	5	4	4	4	0	0	0	0	0	0	0	0	0	0	0	0	0	1	1	2	1	0	0	0	0	0	0	0	0	0	0	0	0	0	0	0	0	0	1	1	2	1
Q9Y5X1	Q9Y5X1	5	5	5	Sorting nexin-9	SNX9	sp|Q9Y5X1|SNX9_HUMAN Sorting nexin-9 OS=Homo sapiens OX=9606 GN=SNX9 PE=1 SV=1	1	5	5	5	0	0	1	1	0	0	0	0	0	0	0	0	2	1	4	2	2	4	0	1	1	0	0	1	1	0	0	0	0	0	0	0	0	2	1	4	2	2
Q9Y5Y0	Q9Y5Y0	2	2	2	Feline leukemia virus subgroup C receptor-related protein 1	FLVCR1	sp|Q9Y5Y0|FLVC1_HUMAN Feline leukemia virus subgroup C receptor-related protein 1 OS=Homo sapiens OX=9606 GN=FLVCR1 PE=1 SV=1	1	2	2	2	2	1	0	0	0	0	0	0	0	0	0	0	0	0	0	0	0	0	0	0	0	2	1	0	0	0	0	0	0	0	0	0	0	0	0	0	0	0
Q9Y6M4	Q9Y6M4	9	9	3	Casein kinase I isoform gamma-3	CSNK1G3	sp|Q9Y6M4|KC1G3_HUMAN Casein kinase I isoform gamma-3 OS=Homo sapiens OX=9606 GN=CSNK1G3 PE=1 SV=2	1	9	9	3	0	1	0	0	2	0	0	0	0	0	0	0	4	4	5	3	2	2	3	5	1	0	1	0	0	2	0	0	0	0	0	0	0	4	4	5	3	2
REV__A0A088AWL3;REV__O75376	REV__A0A088AWL3;REV__O75376	1;1	1;1	1;1			tr|A0A088AWL3|A0A088AWL3_HUMAN Nuclear receptor corepressor 1 OS=Homo sapiens OX=9606 GN=NCOR1 PE=1 SV=1;sp|O75376|NCOR1_HUMAN Nuclear receptor corepressor 1 OS=Homo sapiens OX=9606 GN=NCOR1 PE=1 SV=2	2	1	1	1	1	1	0	0	0	0	0	0	0	0	0	0	0	1	1	0	0	1	0	1	0	1	1	0	0	0	0	0	0	0	0	0	0	0	1	1	0	0
REV__H0YAQ5;REV__E5RFQ2;REV__A0A0A0MTC7;REV__Q16363;REV__A0A0A0MQS9	REV__H0YAQ5;REV__E5RFQ2;REV__A0A0A0MTC7;REV__Q16363;REV__A0A0A0MQS9	1;1;1;1;1	1;1;1;1;1	1;1;1;1;1			tr|H0YAQ5|H0YAQ5_HUMAN Laminin subunit alpha-4 (Fragment) OS=Homo sapiens OX=9606 GN=LAMA4 PE=1 SV=2;tr|E5RFQ2|E5RFQ2_HUMAN Laminin subunit alpha-4 (Fragment) OS=Homo sapiens OX=9606 GN=LAMA4 PE=1 SV=2;tr|A0A0A0MTC7|A0A0A0MTC7_HUMAN Laminin subunit alpha-4	5	1	1	1	0	0	0	0	0	0	0	0	0	0	0	0	0	0	0	0	0	0	0	1	1	0	0	0	0	0	0	0	0	0	0	0	0	0	0	0	0	0
REV__H3BTF6;REV__H3BND0;REV__Q7L2K0	REV__H3BTF6;REV__H3BND0;REV__Q7L2K0	1;1;1	1;1;1	1;1;1			tr|H3BTF6|H3BTF6_HUMAN Tubulin epsilon and delta complex protein 2 (Fragment) OS=Homo sapiens OX=9606 GN=TEDC2 PE=1 SV=1;tr|H3BND0|H3BND0_HUMAN Tubulin epsilon and delta complex protein 2 OS=Homo sapiens OX=9606 GN=TEDC2 PE=1 SV=1;sp|Q7L2K0|TEDC2_HUMAN Tub	3	1	1	1	0	0	0	0	0	0	0	0	0	0	0	0	0	0	1	0	0	0	0	0	0	0	0	0	0	0	0	0	0	0	0	0	0	0	0	1	0	0
REV__Q96RF0	REV__Q96RF0	1	1	1			sp|Q96RF0|SNX18_HUMAN Sorting nexin-18 OS=Homo sapiens OX=9606 GN=SNX18 PE=1 SV=2	1	1	1	1	0	0	1	0	1	0	0	0	0	0	0	0	0	0	0	0	0	0	0	0	0	0	0	1	0	1	0	0	0	0	0	0	0	0	0	0	0	0
REV__Q9NY28	REV__Q9NY28	1	1	1			sp|Q9NY28|GALT8_HUMAN Probable polypeptide N-acetylgalactosaminyltransferase 8 OS=Homo sapiens OX=9606 GN=GALNT8 PE=2 SV=1	1	1	1	1	0	0	0	0	0	0	1	0	0	0	0	0	0	0	0	0	0	0	0	0	0	0	0	0	0	0	0	1	0	0	0	0	0	0	0	0	0	0
S4R3V8;Q86X29	S4R3V8;Q86X29	1;1	1;1	1;1	Lipolysis-stimulated lipoprotein receptor	LSR	tr|S4R3V8|S4R3V8_HUMAN Lipolysis-stimulated lipoprotein receptor OS=Homo sapiens OX=9606 GN=LSR PE=1 SV=2;sp|Q86X29|LSR_HUMAN Lipolysis-stimulated lipoprotein receptor OS=Homo sapiens OX=9606 GN=LSR PE=1 SV=4	2	1	1	1	0	0	0	0	0	0	0	0	0	0	0	0	0	1	1	0	1	0	0	0	0	0	0	0	0	0	0	0	0	0	0	0	0	0	1	1	0	1
U3KPX3;A0A590UJ43;P48729;H0Y9X2;U3KQK7;Q8N752;A0A590UK94;A0A590UJQ7;E5RG27;D6RGE5;U3KQ83	U3KPX3;A0A590UJ43;P48729;H0Y9X2;U3KQK7;Q8N752	11;11;11;6;6;6;3;2;2;2;1	11;11;11;6;6;6;3;2;2;2;1	1;1;1;1;1;0;0;0;0;0;0	Casein kinase I isoform alpha;Casein kinase I isoform alpha-like	CSNK1A1;CSNK1A1L	tr|U3KPX3|U3KPX3_HUMAN Casein kinase I isoform alpha OS=Homo sapiens OX=9606 GN=CSNK1A1 PE=1 SV=2;tr|A0A590UJ43|A0A590UJ43_HUMAN Casein kinase I isoform alpha OS=Homo sapiens OX=9606 GN=CSNK1A1 PE=1 SV=1;sp|P48729|KC1A_HUMAN Casein kinase I isoform alpha O	11	11	11	1	2	2	0	1	1	0	0	0	0	0	0	0	7	8	9	5	5	4	4	3	1	2	2	0	1	1	0	0	0	0	0	0	0	7	8	9	5	5
U3KQK0;Q99880;Q99879;Q99877;Q93079;Q5QNW6;P62807;P58876;P57053;O60814;Q96A08;A0A2R8Y619	U3KQK0;Q99880;Q99879;Q99877;Q93079;Q5QNW6;P62807;P58876;P57053;O60814	6;6;6;6;6;6;6;6;6;6;2;1	6;6;6;6;6;6;6;6;6;6;2;1	2;2;2;2;2;2;2;2;2;2;0;0	Histone H2B;Histone H2B type 1-L;Histone H2B type 1-M;Histone H2B type 1-N;Histone H2B type 1-H;Histone H2B type 2-F;Histone H2B type 1-C/E/F/G/I;Histone H2B type 1-D;Histone H2B type F-S;Histone H2B type 1-K	HIST1H2BN;HIST1H2BL;HIST1H2BM;HIST1H2BH;HIST2H2BF;HIST1H2BC;HIST1H2BD;H2BFS;HIST1H2BK	tr|U3KQK0|U3KQK0_HUMAN Histone H2B OS=Homo sapiens OX=9606 GN=H2BC15 PE=1 SV=1;sp|Q99880|H2B1L_HUMAN Histone H2B type 1-L OS=Homo sapiens OX=9606 GN=H2BC13 PE=1 SV=3;sp|Q99879|H2B1M_HUMAN Histone H2B type 1-M OS=Homo sapiens OX=9606 GN=H2BC14 PE=1 SV=3;sp|	12	6	6	2	2	2	1	0	2	2	2	0	2	3	3	2	0	0	0	0	0	0	1	0	0	2	2	1	0	2	2	2	0	2	3	3	2	0	0	0	0	0
V9GYR2;P05026	V9GYR2;P05026	2;2	2;2	2;2	Sodium/potassium-transporting ATPase subunit beta-1	ATP1B1	tr|V9GYR2|V9GYR2_HUMAN Sodium/potassium-transporting ATPase subunit beta (Fragment) OS=Homo sapiens OX=9606 GN=ATP1B1 PE=1 SV=1;sp|P05026|AT1B1_HUMAN Sodium/potassium-transporting ATPase subunit beta-1 OS=Homo sapiens OX=9606 GN=ATP1B1 PE=1 SV=1	2	2	2	2	1	0	1	0	0	0	0	0	0	0	0	0	0	0	0	0	1	1	0	0	0	1	0	1	0	0	0	0	0	0	0	0	0	0	0	0	0	1
[truncated: 131 more columns]

## Sheet: WT
Protein IDs	Majority protein IDs	Peptide counts (all)	Peptide counts (razor+unique)	Peptide counts (unique)	Protein names	Gene names	Fasta headers	count_WT	count_dG-patch	count_mock	Number of proteins	Peptides	Razor + unique peptides	Unique peptides	Peptides dG-patch_1-1	Peptides dG-patch_1-2	Peptides dG-patch_1-3	Peptides dG-patch_2-1	Peptides dG-patch_2-2	Peptides dG-patch_2-3	Peptides dG-patch_3-1	Peptides dG-patch_3-2	Peptides dG-patch_3-3	Peptides mock_1	Peptides mock_2	Peptides mock_3	Peptides WT_1-1	Peptides WT_1-2	Peptides WT_1-3	Peptides WT_2-1	Peptides WT_2-2	Peptides WT_2-3	Peptides WT_3-1	Peptides WT_3-2	Peptides WT_3-3	Razor + unique peptides dG-patch_1-1	Razor + unique peptides dG-patch_1-2	Razor + unique peptides dG-patch_1-3	Razor + unique peptides dG-patch_2-1	Razor + unique peptides dG-patch_2-2	Razor + unique peptides dG-patch_2-3	Razor + unique peptides dG-patch_3-1	Razor + unique peptides dG-patch_3-2	Razor + unique peptides dG-patch_3-3	Razor + unique peptides mock_1	Razor + unique peptides mock_2	Razor + unique peptides mock_3	Razor + unique peptides WT_1-1	Razor + unique peptides WT_1-2
A0A087WTT1;P11940;E7EQV3;E7ERJ7;H0YAR2;E5RGH3;E5RJB9;Q9H361;H0YBN4;E5RH24;H0YB86;E5RHG7;H0YEQ8;H0YAP2;Q4VXU2;E5RGC4;E5RFD8;A0A6I8PS38;A0A6I8PLA1;Q5JQF8	A0A087WTT1;P11940;E7EQV3;E7ERJ7;H0YAR2	13;13;12;11;7;6;6;6;5;4;4;3;3;3;2;1;1;1;1;1	13;13;12;11;7;6;6;6;5;4;4;3;3;3;2;1;1;1;1;1	6;6;5;6;5;1;1;4;2;1;2;1;0;3;1;1;1;0;0;1	Polyadenylate-binding protein;Polyadenylate-binding protein 1	PABPC1	tr|A0A087WTT1|A0A087WTT1_HUMAN Polyadenylate-binding protein OS=Homo sapiens OX=9606 GN=PABPC1 PE=1 SV=1;sp|P11940|PABP1_HUMAN Polyadenylate-binding protein 1 OS=Homo sapiens OX=9606 GN=PABPC1 PE=1 SV=2;tr|E7EQV3|E7EQV3_HUMAN Polyadenylate-binding protein	9	5	0	20	13	13	6	8	9	3	1	3	2	1	0	0	0	0	0	7	7	8	6	5	5	5	5	3	8	9	3	1	3	2	1	0	0	0	0	0	7	7
A0A087WVQ6;Q00610;J3KS13;A0A087WX41;P53675;K7EJJ5;J3KSQ2;J3QL20;F5H5N6	A0A087WVQ6;Q00610	28;28;10;5;5;3;2;1;1	28;28;10;5;5;3;2;1;1	28;28;10;5;5;3;2;1;1	Clathrin heavy chain;Clathrin heavy chain 1	CLTC	tr|A0A087WVQ6|A0A087WVQ6_HUMAN Clathrin heavy chain OS=Homo sapiens OX=9606 GN=CLTC PE=1 SV=1;sp|Q00610|CLH1_HUMAN Clathrin heavy chain 1 OS=Homo sapiens OX=9606 GN=CLTC PE=1 SV=5	9	7	3	9	28	28	28	9	8	3	5	5	7	5	0	0	3	3	10	7	8	15	9	4	3	5	5	3	9	8	3	5	5	7	5	0	0	3	3	10	7	8
A0A087WY55;Q9NP79;Q5TGM0	A0A087WY55;Q9NP79;Q5TGM0	7;7;4	7;7;4	7;7;4	Vacuolar protein sorting-associated protein VTA1 homolog	VTA1	tr|A0A087WY55|A0A087WY55_HUMAN Chromosome 6 open reading frame 55, isoform CRA_b OS=Homo sapiens OX=9606 GN=VTA1 PE=1 SV=1;sp|Q9NP79|VTA1_HUMAN Vacuolar protein sorting-associated protein VTA1 homolog OS=Homo sapiens OX=9606 GN=VTA1 PE=1 SV=1;tr|Q5TGM0|Q5T	9	6	0	3	7	7	7	3	4	3	1	2	2	2	0	0	0	0	1	5	5	5	3	3	3	4	3	2	3	4	3	1	2	2	2	0	0	0	0	1	5	5
A0A0G2JIW1;P0DMV9;P0DMV8;V9GZ37	A0A0G2JIW1;P0DMV9;P0DMV8;V9GZ37	44;44;44;28	44;44;44;28	27;27;27;17	Heat shock 70 kDa protein 1B;Heat shock 70 kDa protein 1A	HSPA1B;HSPA1A	tr|A0A0G2JIW1|A0A0G2JIW1_HUMAN Heat shock 70 kDa protein 1B OS=Homo sapiens OX=9606 GN=HSPA1B PE=1 SV=1;sp|P0DMV9|HS71B_HUMAN Heat shock 70 kDa protein 1B OS=Homo sapiens OX=9606 GN=HSPA1B PE=1 SV=1;sp|P0DMV8|HS71A_HUMAN Heat shock 70 kDa protein 1A OS=Hom	9	7	3	4	44	44	27	26	31	26	12	22	16	9	1	1	8	7	11	18	23	24	18	19	18	18	19	17	26	31	26	12	22	16	9	1	1	8	7	11	18	23
E9PC69;Q7KZI7;E7ETY4;B4DIB3;A0A087X0I6;Q9P0L2;F5H4F6;P27448;F5H6N2;H0YNV4;J3KNR0;K7EK17;K7EKG8;F5H4J8;H0YKJ3;H0YIY6;Q96L34	E9PC69;Q7KZI7;E7ETY4	21;19;16;4;4;4;3;3;2;2;2;1;1;1;1;1;1	21;19;16;4;4;4;3;3;2;2;2;1;1;1;1;1;1	21;19;16;4;4;4;3;3;2;2;2;1;1;1;1;1;1	Serine/threonine-protein kinase MARK2	MARK2	tr|E9PC69|E9PC69_HUMAN Non-specific serine/threonine protein kinase OS=Homo sapiens OX=9606 GN=MARK2 PE=1 SV=3;sp|Q7KZI7|MARK2_HUMAN Serine/threonine-protein kinase MARK2 OS=Homo sapiens OX=9606 GN=MARK2 PE=1 SV=2;tr|E7ETY4|E7ETY4_HUMAN Non-specific serine	9	2	0	17	21	21	21	2	3	2	2	2	0	0	0	0	0	0	0	8	17	14	10	10	6	7	8	4	2	3	2	2	2	0	0	0	0	0	0	0	8	17
E9PJK1;E9PRJ8;H0YDL9;H0YDJ9;E9PIF1;A6NMH8;P60033;E9PM31;H0YEE2	E9PJK1;E9PRJ8;H0YDL9;H0YDJ9;E9PIF1;A6NMH8;P60033	5;5;5;5;5;5;5;2;2	5;5;5;5;5;5;5;2;2	5;5;5;5;5;5;5;2;2	Tetraspanin;CD81 antigen	CD81	tr|E9PJK1|E9PJK1_HUMAN Tetraspanin OS=Homo sapiens OX=9606 GN=CD81 PE=1 SV=1;tr|E9PRJ8|E9PRJ8_HUMAN Tetraspanin (Fragment) OS=Homo sapiens OX=9606 GN=CD81 PE=1 SV=1;tr|H0YDL9|H0YDL9_HUMAN Tetraspanin (Fragment) OS=Homo sapiens OX=9606 GN=CD81 PE=1 SV=1;tr|	9	7	0	9	5	5	5	4	3	3	1	3	2	2	0	0	1	0	1	4	4	4	4	3	4	3	4	3	4	3	3	1	3	2	2	0	0	1	0	1	4	4
F5GZS6;J3KPF3;P08195;F5H0E2;H0YFS2;F5H867;F5GZI0;F5GZR9;H0YFX4	F5GZS6;J3KPF3;P08195	17;17;17;6;6;4;4;2;2	17;17;17;6;6;4;4;2;2	17;17;17;6;6;4;4;2;2	4F2 cell-surface antigen heavy chain	SLC3A2	tr|F5GZS6|F5GZS6_HUMAN 4F2 cell-surface antigen heavy chain OS=Homo sapiens OX=9606 GN=SLC3A2 PE=1 SV=1;tr|J3KPF3|J3KPF3_HUMAN 4F2 cell-surface antigen heavy chain OS=Homo sapiens OX=9606 GN=SLC3A2 PE=1 SV=1;sp|P08195|4F2_HUMAN 4F2 cell-surface antigen hea	9	6	1	9	17	17	17	6	8	2	2	4	3	1	0	0	1	1	5	7	8	11	9	9	5	7	7	4	6	8	2	2	4	3	1	0	0	1	1	5	7	8
F8VXH9;H3BRU6;F8VZX2;Q15366;F8W0G4;F8W1G6;J3QT27;E9PFP8;P57721;H3BND9;F8VTZ0;F8VRH0	F8VXH9;H3BRU6;F8VZX2;Q15366;F8W0G4;F8W1G6;J3QT27;E9PFP8;P57721	6;6;6;6;5;4;3;3;3;2;1;1	6;6;6;6;5;4;3;3;3;2;1;1	4;4;4;4;3;3;1;1;1;2;0;1	Poly(rC)-binding protein 2;Poly(rC)-binding protein 3	PCBP2;PCBP3	tr|F8VXH9|F8VXH9_HUMAN Poly(rC)-binding protein 2 (Fragment) OS=Homo sapiens OX=9606 GN=PCBP2 PE=1 SV=1;tr|H3BRU6|H3BRU6_HUMAN Poly(rC)-binding protein 2 (Fragment) OS=Homo sapiens OX=9606 GN=PCBP2 PE=1 SV=1;tr|F8VZX2|F8VZX2_HUMAN Poly(rC)-binding protein	9	5	0	12	6	6	4	4	3	2	2	2	1	1	0	0	0	0	0	5	4	4	3	3	3	3	2	3	4	3	2	2	2	1	1	0	0	0	0	0	5	4
J3QS39;J3QTR3;F5H6Q2;F5GYU3;F5H2Z3;F5H265;B4DV12;F5H388;F5H747;F5GXK7;J3QKN0;Q5PY61;Q96C32;P62987;P62979;P0CG47;P0CG48;M0R1V7;Q49A90;M0R1M6;M0R2S1;A0A2R8Y422;F5GZ39;J3QSA3	J3QS39;J3QTR3;F5H6Q2;F5GYU3;F5H2Z3;F5H265;B4DV12;F5H388;F5H747;F5GXK7;J3QKN0;Q5PY61;Q96C32;P62987;P62979;P0CG47;P0CG48;M0R1V7;Q49A90;M0R1M6;M0R2S1;A0A2R8Y422;F5GZ39;J3QSA3	13;13;13;13;13;13;13;13;13;13;13;13;13;13;13;13;13;10;10;9;9;9;8;7	13;13;13;13;13;13;13;13;13;13;13;13;13;13;13;13;13;10;10;9;9;9;8;7	13;13;13;13;13;13;13;13;13;13;13;13;13;13;13;13;13;10;10;9;9;9;8;7	Ubiquitin-60S ribosomal protein L40;Ubiquitin;60S ribosomal protein L40;Ubiquitin-40S ribosomal protein S27a;Ubiquitin;40S ribosomal protein S27a;Polyubiquitin-B;Ubiquitin;Polyubiquitin-C;Ubiquitin	UBB;RPS27A;UBC;UBA52	tr|J3QS39|J3QS39_HUMAN Polyubiquitin-B (Fragment) OS=Homo sapiens OX=9606 GN=UBB PE=1 SV=1;tr|J3QTR3|J3QTR3_HUMAN Ubiquitin-40S ribosomal protein S27a (Fragment) OS=Homo sapiens OX=9606 GN=RPS27A PE=1 SV=1;tr|F5H6Q2|F5H6Q2_HUMAN Polyubiquitin-C (Fragment)	9	8	3	24	13	13	13	9	8	7	5	11	8	9	1	2	3	3	2	7	7	5	3	5	6	6	5	6	9	8	7	5	11	8	9	1	2	3	3	2	7	7
O00560;B4DHN5;E9PBU7	O00560;B4DHN5;E9PBU7	16;9;9	16;9;9	3;2;2	Syntenin-1	SDCBP	sp|O00560|SDCB1_HUMAN Syntenin-1 OS=Homo sapiens OX=9606 GN=SDCBP PE=1 SV=1;tr|B4DHN5|B4DHN5_HUMAN Syntenin-1 OS=Homo sapiens OX=9606 GN=SDCBP PE=1 SV=1;tr|E9PBU7|E9PBU7_HUMAN Syntenin-1 OS=Homo sapiens OX=9606 GN=SDCBP PE=1 SV=1	9	7	3	3	16	16	3	6	6	3	3	3	2	3	1	0	4	3	4	7	7	8	6	5	5	6	8	7	6	6	3	3	3	2	3	1	0	4	3	4	7	7
O14965;A3KFJ0;Q5QPD4;A3KFJ1;Q5QPD2;Q5QPD1;A3KFJ2;B4DXA6;A0A0A0MSY3;Q5Y191;Q9UQB9	O14965;A3KFJ0;Q5QPD4	19;15;11;8;7;4;3;1;1;1;1	19;15;11;8;7;4;3;1;1;1;1	18;14;10;7;7;4;3;0;0;0;0	Aurora kinase A	AURKA	sp|O14965|AURKA_HUMAN Aurora kinase A OS=Homo sapiens OX=9606 GN=AURKA PE=1 SV=2;tr|A3KFJ0|A3KFJ0_HUMAN Non-specific serine/threonine protein kinase OS=Homo sapiens OX=9606 GN=AURKA PE=1 SV=1;tr|Q5QPD4|Q5QPD4_HUMAN Non-specific serine/threonine protein kin	9	7	0	11	19	19	18	8	5	6	2	4	2	5	0	0	0	0	0	13	14	14	10	12	8	11	9	7	8	5	6	2	4	2	5	0	0	0	0	0	13	14
O43143;A0A140T947;F5H658;O60231;Q14562	O43143	28;1;1;1;1	28;1;1;1;1	28;1;1;1;1	Pre-mRNA-splicing factor ATP-dependent RNA helicase DHX15	DHX15	sp|O43143|DHX15_HUMAN Pre-mRNA-splicing factor ATP-dependent RNA helicase DHX15 OS=Homo sapiens OX=9606 GN=DHX15 PE=1 SV=2	9	0	0	5	28	28	28	0	1	0	0	0	0	0	0	0	0	0	0	18	20	25	21	21	21	11	17	11	0	1	0	0	0	0	0	0	0	0	0	0	18	20
O75351;K7EL71;K7EKZ3;Q6PIW4	O75351	17;1;1;1	17;1;1;1	14;1;1;0	Vacuolar protein sorting-associated protein 4B	VPS4B	sp|O75351|VPS4B_HUMAN Vacuolar protein sorting-associated protein 4B OS=Homo sapiens OX=9606 GN=VPS4B PE=1 SV=2	9	6	0	4	17	17	14	8	11	5	1	3	4	2	0	0	0	0	1	5	8	9	7	5	3	2	7	3	8	11	5	1	3	4	2	0	0	0	0	1	5	8
O94973;A0A0G2JS82;E9PR62;A0A0G2JRF9;A0A0G2JQA4;A0A0G2JRS3;M0R2D9;E9PNC4	O94973;A0A0G2JS82	29;27;11;9;9;5;4;4	17;17;6;6;6;4;0;3	5;5;1;1;1;1;0;1	AP-2 complex subunit alpha-2	AP2A2	sp|O94973|AP2A2_HUMAN AP-2 complex subunit alpha-2 OS=Homo sapiens OX=9606 GN=AP2A2 PE=1 SV=2;tr|A0A0G2JS82|A0A0G2JS82_HUMAN AP-2 complex subunit alpha-2 (Fragment) OS=Homo sapiens OX=9606 GN=AP2A2 PE=1 SV=1	9	3	0	8	29	17	5	11	11	4	2	4	0	2	1	0	0	0	0	8	12	16	9	8	8	8	5	6	4	5	1	0	2	0	0	0	0	0	0	0	4	6
O95782	O95782	34	34	22	AP-2 complex subunit alpha-1	AP2A1	sp|O95782|AP2A1_HUMAN AP-2 complex subunit alpha-1 OS=Homo sapiens OX=9606 GN=AP2A1 PE=1 SV=3	9	6	0	1	34	34	22	13	12	7	3	4	2	3	1	0	0	0	0	13	18	20	15	13	12	10	8	10	13	12	7	3	4	2	3	1	0	0	0	0	13	18
P05023;M0R116;A0A2R8YEY8;A0A0A0MT26;P13637;B1AKY9;P50993;H0Y7C1;Q13733;Q5TC01;E9PRA5;Q5TC02;A0A669K9X0;M0QXF2;P20648;P54707	P05023	29;12;12;12;12;10;10;8;6;4;4;3;3;2;2;2	29;12;12;12;12;10;10;8;6;4;4;3;3;2;2;2	29;12;12;12;12;10;10;8;6;4;4;3;3;2;2;2	Sodium/potassium-transporting ATPase subunit alpha-1	ATP1A1	sp|P05023|AT1A1_HUMAN Sodium/potassium-transporting ATPase subunit alpha-1 OS=Homo sapiens OX=9606 GN=ATP1A1 PE=1 SV=1	9	7	3	16	29	29	29	10	14	11	10	11	11	8	0	1	7	7	8	9	10	16	13	12	9	12	9	4	10	14	11	10	11	11	8	0	1	7	7	8	9	10
P07567	P07567	62	5	5			sp|P07567|GAG_MPMV Gag polyprotein OS=Mason-Pfizer monkey virus OX=11855 GN=gag PE=1 SV=3	9	3	0	1	62	5	5	36	35	31	17	23	18	22	3	0	9	5	0	35	39	37	35	32	35	31	31	27	3	1	1	1	0	0	3	0	0	0	0	0	3	4
P07572;E9PGM3	P07572;E9PGM3	109;72	109;72	52;16		DEPDC4	sp|P07572|POL_MPMV Gag-Pro-Pol polyprotein OS=Mason-Pfizer monkey virus OX=11855 GN=gag-pro-pol PE=1 SV=2;tr|E9PGM3|E9PGM3_HUMAN DEP domain-containing protein 4 (Fragment) OS=Homo sapiens OX=9606 GN=DEPDC4 PE=4 SV=2	9	8	2	2	109	109	52	56	58	42	22	37	23	26	4	1	9	5	0	66	77	76	67	61	66	56	59	48	56	58	42	22	37	23	26	4	1	9	5	0	66	77
P08238;Q58FF7;F8W026;Q96GW1;A0A1W2PRR1	P08238	21;8;1;1;1	21;8;1;1;1	12;4;0;0;0	Heat shock protein HSP 90-beta	HSP90AB1	sp|P08238|HS90B_HUMAN Heat shock protein HSP 90-beta OS=Homo sapiens OX=9606 GN=HSP90AB1 PE=1 SV=4	9	7	2	5	21	21	12	9	8	4	3	8	4	3	0	0	4	1	6	7	13	15	11	12	8	9	6	6	9	8	4	3	8	4	3	0	0	4	1	6	7	13
P09543;K7ERC4	P09543	49;20	49;20	32;5	2,3-cyclic-nucleotide 3-phosphodiesterase	CNP	sp|P09543|CN37_HUMAN 2,3-cyclic-nucleotide 3-phosphodiesterase OS=Homo sapiens OX=9606 GN=CNP PE=1 SV=2	9	9	0	2	49	49	32	30	26	21	19	23	16	13	3	4	0	0	0	17	23	21	18	15	16	17	19	14	30	26	21	19	23	16	13	3	4	0	0	0	17	23
P11142;E9PKE3;E9PNE6;A8K7Q2;E9PLF4;E9PQQ4;E9PQK7;E9PK54;E9PPY6;E9PI65;P54652;E9PN25;E9PS65;E9PM13	P11142;E9PKE3;E9PNE6;A8K7Q2	44;42;31;24;17;16;16;16;13;13;12;11;10;7	41;39;28;23;15;14;14;14;11;11;9;9;9;6	15;15;15;11;4;4;4;4;4;2;0;4;9;6	Heat shock cognate 71 kDa protein	HSPA8	sp|P11142|HSP7C_HUMAN Heat shock cognate 71 kDa protein OS=Homo sapiens OX=9606 GN=HSPA8 PE=1 SV=1;tr|E9PKE3|E9PKE3_HUMAN Heat shock cognate 71 kDa protein OS=Homo sapiens OX=9606 GN=HSPA8 PE=1 SV=1;tr|E9PNE6|E9PNE6_HUMAN Heat shock cognate 71 kDa protein	9	7	3	14	44	41	15	25	27	26	18	22	14	15	0	2	8	8	15	22	23	26	22	24	23	20	19	17	24	26	24	18	20	13	14	0	1	7	7	14	21	22
P31689	P31689	12	12	12	DnaJ homolog subfamily A member 1	DNAJA1	sp|P31689|DNJA1_HUMAN DnaJ homolog subfamily A member 1 OS=Homo sapiens OX=9606 GN=DNAJA1 PE=1 SV=2	9	5	0	1	12	12	12	6	2	3	2	3	1	1	0	0	1	0	1	5	6	4	4	6	5	2	4	2	6	2	3	2	3	1	1	0	0	1	0	1	5	6
P35613;A0A087WUV8;A0A087X2B5;I3L192;R4GMX5;R4GN83;A0A2R8YDZ0	P35613;A0A087WUV8;A0A087X2B5;I3L192	7;6;6;4;3;2;1	7;6;6;4;3;2;1	7;6;6;4;3;2;1	Basigin	BSG	sp|P35613|BASI_HUMAN Basigin OS=Homo sapiens OX=9606 GN=BSG PE=1 SV=2;tr|A0A087WUV8|A0A087WUV8_HUMAN Basigin OS=Homo sapiens OX=9606 GN=BSG PE=1 SV=1;tr|A0A087X2B5|A0A087X2B5_HUMAN Basigin (Fragment) OS=Homo sapiens OX=9606 GN=BSG PE=1 SV=1;tr|I3L192|I3L19	9	7	2	7	7	7	7	4	4	5	4	3	3	2	1	0	1	2	4	5	6	7	6	6	5	7	6	5	4	4	5	4	3	3	2	1	0	1	2	4	5	6
P40222;Q8N3L3	P40222	25;1	25;1	24;0	Alpha-taxilin	TXLNA	sp|P40222|TXLNA_HUMAN Alpha-taxilin OS=Homo sapiens OX=9606 GN=TXLNA PE=1 SV=3	9	6	0	2	25	25	24	7	3	3	5	3	1	4	1	1	0	0	0	7	13	12	12	10	8	9	6	4	7	3	3	5	3	1	4	1	1	0	0	0	7	13
P42566;B1AUU8;S4R3U1	P42566;B1AUU8	33;28;4	33;28;4	33;28;4	Epidermal growth factor receptor substrate 15	EPS15	sp|P42566|EPS15_HUMAN Epidermal growth factor receptor substrate 15 OS=Homo sapiens OX=9606 GN=EPS15 PE=1 SV=2;tr|B1AUU8|B1AUU8_HUMAN Epidermal growth factor receptor substrate 15 OS=Homo sapiens OX=9606 GN=EPS15 PE=1 SV=1	9	7	0	3	33	33	33	11	8	7	5	6	3	3	0	0	0	0	0	19	21	23	17	18	11	14	15	12	11	8	7	5	6	3	3	0	0	0	0	0	19	21
P49674;H0Y645;B0QY35;B0QY34;A0A669KBC0;H0Y682;H0Y5S9;J3QQI9;B0QY36;H0Y2N6	P49674;H0Y645;B0QY35;B0QY34;A0A669KBC0	15;10;10;10;10;6;5;5;5;4	15;10;10;10;10;6;5;5;5;4	6;1;1;1;1;5;5;0;0;0	Casein kinase I isoform epsilon	CSNK1E	sp|P49674|KC1E_HUMAN Casein kinase I isoform epsilon OS=Homo sapiens OX=9606 GN=CSNK1E PE=1 SV=1;tr|H0Y645|H0Y645_HUMAN Casein kinase I isoform epsilon (Fragment) OS=Homo sapiens OX=9606 GN=CSNK1E PE=1 SV=1;tr|B0QY35|B0QY35_HUMAN Casein kinase I isoform ep	9	4	0	10	15	15	6	6	5	1	3	5	1	1	1	0	0	0	0	6	9	6	5	4	6	4	3	3	6	5	1	3	5	1	1	1	0	0	0	0	6	9
P49841;A0A3B3ITW1	P49841;A0A3B3ITW1	19;17	19;17	14;12	Glycogen synthase kinase-3 beta	GSK3B	sp|P49841|GSK3B_HUMAN Glycogen synthase kinase-3 beta OS=Homo sapiens OX=9606 GN=GSK3B PE=1 SV=2;tr|A0A3B3ITW1|A0A3B3ITW1_HUMAN Glycogen synthase kinase-3 beta OS=Homo sapiens OX=9606 GN=GSK3B PE=1 SV=1	9	6	0	2	19	19	14	6	6	3	3	2	2	1	0	0	0	0	0	9	11	15	10	11	9	8	4	5	6	6	3	3	2	2	1	0	0	0	0	0	9	11
P51149;C9J592;C9J8S3;C9IZZ0;C9J4V0;C9J4S4;C9J7D1	P51149;C9J592;C9J8S3;C9IZZ0	8;6;5;4;3;2;1	8;6;5;4;3;2;1	8;6;5;4;3;2;1	Ras-related protein Rab-7a	RAB7A	sp|P51149|RAB7A_HUMAN Ras-related protein Rab-7a OS=Homo sapiens OX=9606 GN=RAB7A PE=1 SV=1;tr|C9J592|C9J592_HUMAN Ras-related protein Rab-7a (Fragment) OS=Homo sapiens OX=9606 GN=RAB7A PE=1 SV=1;tr|C9J8S3|C9J8S3_HUMAN Ras-related protein Rab-7a OS=Homo sa	9	0	0	7	8	8	8	1	1	0	1	1	0	0	0	0	0	1	1	6	6	7	6	4	5	4	5	5	1	1	0	1	1	0	0	0	0	0	1	1	6	6
P51153;A0A087WWB9	P51153	7;3	7;3	5;3	Ras-related protein Rab-13	RAB13	sp|P51153|RAB13_HUMAN Ras-related protein Rab-13 OS=Homo sapiens OX=9606 GN=RAB13 PE=1 SV=1	9	0	0	2	7	7	5	2	2	0	2	1	0	1	0	0	1	0	1	3	5	4	3	3	2	2	2	2	2	2	0	2	1	0	1	0	0	1	0	1	3	5
P53350;I3L2H5;I3L387;I3L309	P53350	18;4;4;1	18;4;4;1	18;4;4;1	Serine/threonine-protein kinase PLK1	PLK1	sp|P53350|PLK1_HUMAN Serine/threonine-protein kinase PLK1 OS=Homo sapiens OX=9606 GN=PLK1 PE=1 SV=1	9	6	0	4	18	18	18	7	7	3	2	4	1	3	1	0	0	0	0	7	7	11	7	9	5	6	6	6	7	7	3	2	4	1	3	1	0	0	0	0	7	7
P61224;E7ESV4;F5H7Y6;F5GX62;A6NIZ1;F5H823;B7ZB78;F5GZG1;F5H6R7;F5H004;F5H077;F5GWU8;F5H491;F5H0B7;F5H500;F5GYB5;F5H4H0;F5GYH7;F8WBC0	P61224;E7ESV4;F5H7Y6;F5GX62;A6NIZ1;F5H823;B7ZB78;F5GZG1;F5H6R7;F5H004	11;9;9;8;8;6;6;6;6;6;5;5;5;5;5;5;4;4;2	11;9;9;8;8;6;6;6;6;6;5;5;5;5;5;5;4;4;2	3;3;3;2;2;2;2;2;2;2;1;1;1;1;1;1;0;0;0	Ras-related protein Rap-1b;Ras-related protein Rap-1b-like protein	RAP1B	sp|P61224|RAP1B_HUMAN Ras-related protein Rap-1b OS=Homo sapiens OX=9606 GN=RAP1B PE=1 SV=1;tr|E7ESV4|E7ESV4_HUMAN Ras-related protein Rap-1b (Fragment) OS=Homo sapiens OX=9606 GN=RAP1B PE=1 SV=1;tr|F5H7Y6|F5H7Y6_HUMAN Ras-related protein Rap-1b OS=Homo sa	9	6	0	19	11	11	3	4	4	3	2	2	1	2	0	0	1	1	1	4	9	8	4	3	4	4	3	2	4	4	3	2	2	1	2	0	0	1	1	1	4	9
P63010;A0A087X253;A0A087WU93;A0A087WZQ6;A0A087WYD1;K7ERB2;K7EN71;K7EJ01;H7C034;K7EJX1;A0A087WXS3;K7EKZ5	P63010;A0A087X253;A0A087WU93;A0A087WZQ6	25;21;16;16;12;6;5;4;3;2;1;1	25;21;16;16;12;6;5;4;3;2;1;1	14;14;6;6;6;2;2;1;0;2;1;1	AP-2 complex subunit beta	AP2B1	sp|P63010|AP2B1_HUMAN AP-2 complex subunit beta OS=Homo sapiens OX=9606 GN=AP2B1 PE=1 SV=1;tr|A0A087X253|A0A087X253_HUMAN AP complex subunit beta OS=Homo sapiens OX=9606 GN=AP2B1 PE=1 SV=1;tr|A0A087WU93|A0A087WU93_HUMAN AP-2 complex subunit beta (Fragment)	9	1	0	12	25	25	14	1	5	2	2	2	0	1	1	0	0	0	0	9	12	13	7	9	4	4	8	2	1	5	2	2	2	0	1	1	0	0	0	0	9	12
P63167;Q96FJ2;F8VXI7;F8VXL2;F8VRV5	P63167;Q96FJ2	4;3;1;1;1	4;3;1;1;1	4;3;1;1;1	Dynein light chain 1, cytoplasmic;Dynein light chain 2, cytoplasmic	DYNLL1;DYNLL2	sp|P63167|DYL1_HUMAN Dynein light chain 1, cytoplasmic OS=Homo sapiens OX=9606 GN=DYNLL1 PE=1 SV=1;sp|Q96FJ2|DYL2_HUMAN Dynein light chain 2, cytoplasmic OS=Homo sapiens OX=9606 GN=DYNLL2 PE=1 SV=1	9	0	0	5	4	4	4	0	0	0	1	0	0	0	0	0	0	0	0	3	3	4	4	3	3	3	2	2	0	0	0	1	0	0	0	0	0	0	0	0	3	3
P63261;I3L3I0;I3L1U9;I3L3R2;J3KT65;I3L4N8;K7EM38	P63261;I3L3I0;I3L1U9;I3L3R2;J3KT65;I3L4N8	24;16;16;12;12;12;11	24;16;16;12;12;12;11	1;1;1;1;1;1;1	Actin, cytoplasmic 2;Actin, cytoplasmic 2, N-terminally processed	ACTG1	sp|P63261|ACTG_HUMAN Actin, cytoplasmic 2 OS=Homo sapiens OX=9606 GN=ACTG1 PE=1 SV=1;tr|I3L3I0|I3L3I0_HUMAN Actin, cytoplasmic 2 (Fragment) OS=Homo sapiens OX=9606 GN=ACTG1 PE=1 SV=1;tr|I3L1U9|I3L1U9_HUMAN Actin, cytoplasmic 2 (Fragment) OS=Homo sapiens OX	9	9	3	7	24	24	1	13	12	11	6	12	5	7	3	5	5	6	6	10	10	11	10	11	9	7	8	9	13	12	11	6	12	5	7	3	5	5	6	6	10	10
P68363;F8VVB9;F8VQQ4;F8VRZ4;F8VS66;F8VX09;F8VWV9;F8VRK0;C9K0S6;F8W0F6;F8VXZ7;A6NHL2	P68363;F8VVB9;F8VQQ4	15;9;8;7;7;6;6;4;2;2;1;1	15;9;8;7;7;6;6;4;2;2;1;1	0;0;0;0;0;0;0;0;0;0;0;0	Tubulin alpha-1B chain	TUBA1B;TUBA1A	sp|P68363|TBA1B_HUMAN Tubulin alpha-1B chain OS=Homo sapiens OX=9606 GN=TUBA1B PE=1 SV=1;tr|F8VVB9|F8VVB9_HUMAN Tubulin alpha-1B chain (Fragment) OS=Homo sapiens OX=9606 GN=TUBA1B PE=1 SV=8;tr|F8VQQ4|F8VQQ4_HUMAN Tubulin alpha chain (Fragment) OS=Homo sapi	9	7	1	12	15	15	0	7	7	8	2	6	5	4	0	0	1	1	8	6	9	10	9	5	5	4	6	4	7	7	8	2	6	5	4	0	0	1	1	8	6	9
P84077;P61204;F5H423;F5H0C7;C9J1Z8;P84085;C9JPM4;P18085;H0YGG7;C9JAK5;F5H1V1;F5H6T5;F8WDB3	P84077;P61204;F5H423;F5H0C7;C9J1Z8;P84085	10;10;8;5;5;5;4;4;2;2;1;1;1	10;10;8;5;5;5;4;4;2;2;1;1;1	10;10;8;5;5;5;4;4;2;2;1;1;1	ADP-ribosylation factor 1;ADP-ribosylation factor 3;ADP-ribosylation factor 5	ARF1;ARF3;ARF5	sp|P84077|ARF1_HUMAN ADP-ribosylation factor 1 OS=Homo sapiens OX=9606 GN=ARF1 PE=1 SV=2;sp|P61204|ARF3_HUMAN ADP-ribosylation factor 3 OS=Homo sapiens OX=9606 GN=ARF3 PE=1 SV=2;tr|F5H423|F5H423_HUMAN Uncharacterized protein OS=Homo sapiens OX=9606 PE=3 SV	9	0	0	13	10	10	10	0	0	0	0	0	0	0	0	0	0	0	0	6	6	7	6	5	4	2	3	3	0	0	0	0	0	0	0	0	0	0	0	0	6	6
Q08431;H0YKS8;A0A087WUV5	Q08431;H0YKS8	16;10;3	16;10;3	16;10;3	Lactadherin;Lactadherin short form;Medin	MFGE8	sp|Q08431|MFGM_HUMAN Lactadherin OS=Homo sapiens OX=9606 GN=MFGE8 PE=1 SV=3;tr|H0YKS8|H0YKS8_HUMAN Lactadherin (Fragment) OS=Homo sapiens OX=9606 GN=MFGE8 PE=1 SV=1	9	5	2	3	16	16	16	7	8	5	3	5	1	2	0	0	4	2	6	7	9	8	5	6	3	5	5	5	7	8	5	3	5	1	2	0	0	4	2	6	7	9
Q0JRZ9;H7BXJ4;H0YAE2	Q0JRZ9;H7BXJ4	16;8;5	16;8;5	16;8;5	F-BAR domain only protein 2	FCHO2	sp|Q0JRZ9|FCHO2_HUMAN F-BAR domain only protein 2 OS=Homo sapiens OX=9606 GN=FCHO2 PE=1 SV=2;tr|H7BXJ4|H7BXJ4_HUMAN F-BAR domain only protein 2 OS=Homo sapiens OX=9606 GN=FCHO2 PE=1 SV=1	9	4	0	3	16	16	16	4	5	2	0	3	1	0	0	0	0	0	0	4	12	10	7	5	3	3	5	3	4	5	2	0	3	1	0	0	0	0	0	0	4	12
Q15758;M0QXM4;M0QX44;M0R144	Q15758;M0QXM4	13;9;3;2	13;9;3;2	13;9;3;2	Neutral amino acid transporter B(0);Amino acid transporter	SLC1A5	sp|Q15758|AAAT_HUMAN Neutral amino acid transporter B(0) OS=Homo sapiens OX=9606 GN=SLC1A5 PE=1 SV=2;tr|M0QXM4|M0QXM4_HUMAN Amino acid transporter OS=Homo sapiens OX=9606 GN=SLC1A5 PE=1 SV=1	9	5	1	4	13	13	13	7	6	4	1	3	3	1	0	0	1	1	3	7	7	7	5	5	6	6	6	6	7	6	4	1	3	3	1	0	0	1	1	3	7	7
Q15811;F8W7U0;A8CTZ0;C9JQZ7;D6PAW0;H7C429;H0Y523;H0Y6W3;Q6J334;H0Y3G5	Q15811;F8W7U0;A8CTZ0	24;22;21;6;4;2;2;1;1;1	24;22;21;6;4;2;2;1;1;1	9;9;9;3;3;1;2;0;0;0	Intersectin-1	ITSN1	sp|Q15811|ITSN1_HUMAN Intersectin-1 OS=Homo sapiens OX=9606 GN=ITSN1 PE=1 SV=3;tr|F8W7U0|F8W7U0_HUMAN Intersectin-1 OS=Homo sapiens OX=9606 GN=ITSN1 PE=1 SV=1;tr|A8CTZ0|A8CTZ0_HUMAN Intersectin 1 short form variant 13 OS=Homo sapiens OX=9606 GN=ITSN1 PE=1	9	7	0	10	24	24	9	9	8	2	2	2	2	2	0	0	0	0	0	8	11	13	10	10	7	8	7	4	9	8	2	2	2	2	2	0	0	0	0	0	8	11
Q53EZ4;H0Y432	Q53EZ4	20;9	20;9	20;9	Centrosomal protein of 55 kDa	CEP55	sp|Q53EZ4|CEP55_HUMAN Centrosomal protein of 55 kDa OS=Homo sapiens OX=9606 GN=CEP55 PE=1 SV=3	9	6	0	2	20	20	20	6	11	3	8	4	1	3	1	0	0	0	0	4	7	6	5	4	5	4	5	4	6	11	3	8	4	1	3	1	0	0	0	0	4	7
Q6P1N0;K7EJY5	Q6P1N0	21;5	21;5	9;5	Coiled-coil and C2 domain-containing protein 1A	CC2D1A	sp|Q6P1N0|C2D1A_HUMAN Coiled-coil and C2 domain-containing protein 1A OS=Homo sapiens OX=9606 GN=CC2D1A PE=1 SV=1	9	6	0	2	21	21	9	7	8	6	5	4	2	2	0	0	0	0	0	8	9	14	8	6	9	10	7	5	7	8	6	5	4	2	2	0	0	0	0	0	8	9
Q77YG6	Q77YG6	20	20	20			tr|Q77YG6|Q77YG6_MPMV Glycoprotein 20 OS=Mason-Pfizer monkey virus OX=11855 GN=env PE=4 SV=1	9	7	0	1	20	20	20	11	13	8	8	8	7	6	1	1	1	0	0	10	12	14	13	12	11	11	9	8	11	13	8	8	8	7	6	1	1	1	0	0	10	12
Q8WUM4;A0A3B3IT07;C9IZF9;F8WEQ7;F8WBR8;F8WDK9	Q8WUM4	68;16;11;8;8;6	68;16;11;8;8;6	68;16;11;8;8;6	Programmed cell death 6-interacting protein	PDCD6IP	sp|Q8WUM4|PDC6I_HUMAN Programmed cell death 6-interacting protein OS=Homo sapiens OX=9606 GN=PDCD6IP PE=1 SV=1	9	8	3	6	68	68	68	29	40	27	21	32	23	18	2	1	3	3	5	32	38	40	35	30	29	31	31	26	29	40	27	21	32	23	18	2	1	3	3	5	32	38
Q969P0;C9J8Z4	Q969P0;C9J8Z4	17;12	17;12	17;12	Immunoglobulin superfamily member 8	IGSF8	sp|Q969P0|IGSF8_HUMAN Immunoglobulin superfamily member 8 OS=Homo sapiens OX=9606 GN=IGSF8 PE=1 SV=1;tr|C9J8Z4|C9J8Z4_HUMAN Immunoglobulin superfamily member 8 (Fragment) OS=Homo sapiens OX=9606 GN=IGSF8 PE=1 SV=1	9	7	1	2	17	17	17	9	11	5	8	5	4	3	0	0	0	0	2	8	6	12	11	8	7	8	8	5	9	11	5	8	5	4	3	0	0	0	0	2	8	6
Q99816;F5H442;J3QRU6;J3QKS4	Q99816;F5H442	15;14;2;2	15;14;2;2	15;14;2;2	Tumor susceptibility gene 101 protein	TSG101	sp|Q99816|TS101_HUMAN Tumor susceptibility gene 101 protein OS=Homo sapiens OX=9606 GN=TSG101 PE=1 SV=2;tr|F5H442|F5H442_HUMAN Tumor susceptibility gene 101 protein OS=Homo sapiens OX=9606 GN=TSG101 PE=1 SV=1	9	8	0	4	15	15	15	7	7	6	5	5	4	3	2	1	0	0	0	10	8	8	8	8	7	8	5	7	7	7	6	5	5	4	3	2	1	0	0	0	10	8
Q9H223	Q9H223	17	17	14	EH domain-containing protein 4	EHD4	sp|Q9H223|EHD4_HUMAN EH domain-containing protein 4 OS=Homo sapiens OX=9606 GN=EHD4 PE=1 SV=1	9	7	0	1	17	17	14	3	5	4	5	5	2	3	0	0	0	0	0	9	8	12	8	10	5	5	5	3	3	5	4	5	5	2	3	0	0	0	0	0	9	8
Q9H444	Q9H444	11	11	10	Charged multivesicular body protein 4b	CHMP4B	sp|Q9H444|CHM4B_HUMAN Charged multivesicular body protein 4b OS=Homo sapiens OX=9606 GN=CHMP4B PE=1 SV=1	9	8	0	1	11	11	10	5	7	7	3	4	3	4	1	2	0	0	0	3	4	4	2	2	3	3	2	2	5	7	7	3	4	3	4	1	2	0	0	0	3	4
Q9H9H4;F5H4M0;F5H1F6	Q9H9H4;F5H4M0	15;11;7	15;11;7	15;11;7	Vacuolar protein sorting-associated protein 37B	VPS37B	sp|Q9H9H4|VP37B_HUMAN Vacuolar protein sorting-associated protein 37B OS=Homo sapiens OX=9606 GN=VPS37B PE=1 SV=1;tr|F5H4M0|F5H4M0_HUMAN Vacuolar protein sorting-associated protein 37B (Fragment) OS=Homo sapiens OX=9606 GN=VPS37B PE=1 SV=1	9	4	0	3	15	15	15	5	6	2	0	2	0	1	0	0	0	0	0	6	9	8	4	4	4	3	5	4	5	6	2	0	2	0	1	0	0	0	0	0	6	9
Q9HCE1;Q5JR04	Q9HCE1;Q5JR04	28;27	28;27	28;27	Putative helicase MOV-10	MOV10	sp|Q9HCE1|MOV10_HUMAN Helicase MOV-10 OS=Homo sapiens OX=9606 GN=MOV10 PE=1 SV=2;tr|Q5JR04|Q5JR04_HUMAN RNA helicase OS=Homo sapiens OX=9606 GN=MOV10 PE=1 SV=1	9	2	0	2	28	28	28	7	1	2	1	2	1	2	0	0	0	0	0	14	15	17	13	17	10	11	12	6	7	1	2	1	2	1	2	0	0	0	0	0	14	15
Q9NUQ3	Q9NUQ3	12	11	11	Gamma-taxilin	TXLNG	sp|Q9NUQ3|TXLNG_HUMAN Gamma-taxilin OS=Homo sapiens OX=9606 GN=TXLNG PE=1 SV=2	9	1	0	1	12	11	11	2	1	1	1	0	1	2	1	0	0	0	0	6	9	7	6	6	5	6	5	2	2	1	0	1	0	1	1	0	0	0	0	0	6	9
Q9P2B2	Q9P2B2	31	31	31	Prostaglandin F2 receptor negative regulator	PTGFRN	sp|Q9P2B2|FPRP_HUMAN Prostaglandin F2 receptor negative regulator OS=Homo sapiens OX=9606 GN=PTGFRN PE=1 SV=2	9	4	0	1	31	31	31	13	8	6	4	2	1	0	1	1	1	0	0	18	20	22	19	18	15	15	14	9	13	8	6	4	2	1	0	1	1	1	0	0	18	20
Q9UBC2;M0R165;M0R2S2;M0R1V5;M0R3I1;K7EJR2;M0R330;M0QX30	Q9UBC2;M0R165;M0R2S2	53;51;31;10;10;7;7;6	53;51;31;10;10;7;7;6	53;51;31;10;10;7;7;6	Epidermal growth factor receptor substrate 15-like 1	EPS15L1	sp|Q9UBC2|EP15R_HUMAN Epidermal growth factor receptor substrate 15-like 1 OS=Homo sapiens OX=9606 GN=EPS15L1 PE=1 SV=1;tr|M0R165|M0R165_HUMAN Epidermal growth factor receptor substrate 15-like 1 OS=Homo sapiens OX=9606 GN=EPS15L1 PE=1 SV=1;tr|M0R2S2|M0R2S	9	9	0	8	53	53	53	23	23	13	7	16	9	7	2	3	0	0	0	25	30	32	27	27	23	24	22	15	23	23	13	7	16	9	7	2	3	0	0	0	25	30
Q9UK41;E9PQR7;E9PM90;E9PR04;E9PLM9	Q9UK41;E9PQR7;E9PM90	13;12;7;4;2	13;12;7;4;2	13;12;7;4;2	Vacuolar protein sorting-associated protein 28 homolog	VPS28	sp|Q9UK41|VPS28_HUMAN Vacuolar protein sorting-associated protein 28 homolog OS=Homo sapiens OX=9606 GN=VPS28 PE=1 SV=1;tr|E9PQR7|E9PQR7_HUMAN Vacuolar protein sorting-associated protein 28 homolog (Fragment) OS=Homo sapiens OX=9606 GN=VPS28 PE=1 SV=1;tr|E	9	7	0	5	13	13	13	4	5	4	3	4	3	2	0	0	0	0	0	9	9	10	9	9	8	7	6	5	4	5	4	3	4	3	2	0	0	0	0	0	9	9
Q9UKS6;A0A0C4DGG1;E9PIY1;E9PJ75;E9PNM9;E9PJ33;H0YDM6	Q9UKS6;A0A0C4DGG1;E9PIY1	11;10;7;4;4;2;2	11;10;7;4;4;2;2	11;10;7;4;4;2;2	Protein kinase C and casein kinase substrate in neurons protein 3	PACSIN3	sp|Q9UKS6|PACN3_HUMAN Protein kinase C and casein kinase substrate in neurons protein 3 OS=Homo sapiens OX=9606 GN=PACSIN3 PE=1 SV=2;tr|A0A0C4DGG1|A0A0C4DGG1_HUMAN Protein kinase C and casein kinase substrate in neurons protein 3 (Fragment) OS=Homo sapiens	9	3	0	7	11	11	11	6	3	3	1	1	0	0	0	0	0	0	0	6	6	7	5	5	2	5	5	3	6	3	3	1	1	0	0	0	0	0	0	0	6	6
Q9UNF0;A0A0U1RR22;B0QYG7;B0QYG8;H0Y923	Q9UNF0;A0A0U1RR22	19;17;6;6;1	19;17;6;6;1	19;17;6;6;1	Protein kinase C and casein kinase substrate in neurons protein 2	PACSIN2	sp|Q9UNF0|PACN2_HUMAN Protein kinase C and casein kinase substrate in neurons protein 2 OS=Homo sapiens OX=9606 GN=PACSIN2 PE=1 SV=2;tr|A0A0U1RR22|A0A0U1RR22_HUMAN Protein kinase C and casein kinase substrate in neurons protein 2 (Fragment) OS=Homo sapiens	9	3	0	5	19	19	19	9	8	3	2	1	0	0	0	0	0	0	0	10	13	12	10	11	10	7	4	6	9	8	3	2	1	0	0	0	0	0	0	0	10	13
A0A024R571;Q9H4M9;C9JC03;C9J2Z4;C9JDQ8;C9JIJ3;C9IZH1	A0A024R571;Q9H4M9;C9JC03;C9J2Z4	17;17;14;13;8;3;3	15;15;12;11;6;3;3	9;9;6;7;3;1;1	EH domain-containing protein 1	EHD1	tr|A0A024R571|A0A024R571_HUMAN EH domain-containing protein 1 OS=Homo sapiens OX=9606 GN=EHD1 PE=1 SV=1;sp|Q9H4M9|EHD1_HUMAN EH domain-containing protein 1 OS=Homo sapiens OX=9606 GN=EHD1 PE=1 SV=2;tr|C9JC03|C9JC03_HUMAN EH domain-containing protein 1 (Fra	8	2	0	7	17	15	9	3	3	1	0	0	0	0	0	0	0	0	0	4	9	11	6	6	5	1	3	2	3	3	1	0	0	0	0	0	0	0	0	0	3	8
A0A087WVF7;Q9NZM3;E7EPJ2;H7BZD4	A0A087WVF7;Q9NZM3	22;22;8;1	20;20;8;1	20;20;8;1	Intersectin-2	ITSN2	tr|A0A087WVF7|A0A087WVF7_HUMAN Intersectin-2 OS=Homo sapiens OX=9606 GN=ITSN2 PE=1 SV=1;sp|Q9NZM3|ITSN2_HUMAN Intersectin-2 OS=Homo sapiens OX=9606 GN=ITSN2 PE=1 SV=3	8	4	0	4	22	20	20	6	4	4	1	1	1	2	1	0	0	0	0	9	9	10	9	6	4	6	6	3	6	4	4	1	1	1	2	1	0	0	0	0	8	7
A0A087WY71;E9PFW3;Q96CW1;C9JJ47;C9JTK4;C9JGT8;C9JJD3;C9JPV8;H7C4C3	A0A087WY71;E9PFW3;Q96CW1;C9JJ47	11;11;11;8;4;4;3;3;1	11;11;11;8;4;4;3;3;1	11;11;11;8;4;4;3;3;1	AP-2 complex subunit mu	AP2M1	tr|A0A087WY71|A0A087WY71_HUMAN AP-2 complex subunit mu OS=Homo sapiens OX=9606 GN=AP2M1 PE=1 SV=1;tr|E9PFW3|E9PFW3_HUMAN AP-2 complex subunit mu OS=Homo sapiens OX=9606 GN=AP2M1 PE=1 SV=1;sp|Q96CW1|AP2M1_HUMAN AP-2 complex subunit mu OS=Homo sapiens OX=960	8	3	0	9	11	11	11	6	5	1	2	1	2	1	0	0	0	0	0	2	3	5	4	3	3	3	3	1	6	5	1	2	1	2	1	0	0	0	0	0	2	3
H3BMH2;H3BSC1;P62491;Q15907;B4DQU5	H3BMH2;H3BSC1;P62491;Q15907	5;5;5;5;2	5;5;5;5;2	5;5;5;5;2	Ras-related protein Rab-11A;Ras-related protein Rab-11B	RAB11A;RAB11B	tr|H3BMH2|H3BMH2_HUMAN Ras-related protein Rab-11A (Fragment) OS=Homo sapiens OX=9606 GN=RAB11A PE=4 SV=1;tr|H3BSC1|H3BSC1_HUMAN Ras-related protein Rab-11A OS=Homo sapiens OX=9606 GN=RAB11A PE=1 SV=1;sp|P62491|RB11A_HUMAN Ras-related protein Rab-11A OS=Ho	8	2	0	5	5	5	5	2	0	1	1	0	1	3	0	0	0	0	1	3	4	4	4	4	3	3	2	1	2	0	1	1	0	1	3	0	0	0	0	1	3	4
P00742	P00742	4	4	4	Coagulation factor X;Factor X light chain;Factor X heavy chain;Activated factor Xa heavy chain	F10	sp|P00742|FA10_HUMAN Coagulation factor X OS=Homo sapiens OX=9606 GN=F10 PE=1 SV=2	8	4	1	1	4	4	4	1	2	2	2	2	0	2	1	1	1	0	3	3	4	3	3	2	2	1	2	3	1	2	2	2	2	0	2	1	1	1	0	3	3	4
P49840;A8MT37;M0QYV0	P49840;A8MT37	19;16;7	14;11;6	14;11;6	Glycogen synthase kinase-3 alpha	GSK3A	sp|P49840|GSK3A_HUMAN Glycogen synthase kinase-3 alpha OS=Homo sapiens OX=9606 GN=GSK3A PE=1 SV=2;tr|A8MT37|A8MT37_HUMAN [Tau protein] kinase OS=Homo sapiens OX=9606 GN=GSK3A PE=1 SV=2	8	5	0	3	19	14	14	8	4	3	0	4	2	0	0	0	0	0	0	8	10	14	7	8	9	7	5	2	6	4	3	0	4	2	0	0	0	0	0	0	6	8
P53985;Q5T8R3;Q5T8R5	P53985;Q5T8R3;Q5T8R5	6;4;4	6;4;4	6;4;4	Monocarboxylate transporter 1	SLC16A1	sp|P53985|MOT1_HUMAN Monocarboxylate transporter 1 OS=Homo sapiens OX=9606 GN=SLC16A1 PE=1 SV=3;tr|Q5T8R3|Q5T8R3_HUMAN Monocarboxylate transporter 1 (Fragment) OS=Homo sapiens OX=9606 GN=SLC16A1 PE=1 SV=1;tr|Q5T8R5|Q5T8R5_HUMAN Monocarboxylate transporter	8	0	0	3	6	6	6	1	1	1	1	3	2	3	0	1	1	1	0	2	4	3	2	2	2	2	2	1	1	1	1	1	3	2	3	0	1	1	1	0	2	4
P55072;C9JUP7;C9IZA5	P55072	21;2;2	21;2;2	21;2;2	Transitional endoplasmic reticulum ATPase	VCP	sp|P55072|TERA_HUMAN Transitional endoplasmic reticulum ATPase OS=Homo sapiens OX=9606 GN=VCP PE=1 SV=4	8	3	0	3	21	21	21	5	12	4	1	0	0	0	0	0	0	0	0	7	11	10	8	5	3	3	2	0	5	12	4	1	0	0	0	0	0	0	0	0	7	11
P62937;F8WE65;C9J5S7;E5RIZ5;P0DN26;A0A0H2UH34;A0A0B4J2A2;A0A075B767;A0A075B759;Q9Y536;F5H284	P62937;F8WE65;C9J5S7	9;7;7;1;1;1;1;1;1;1;1	9;7;7;1;1;1;1;1;1;1;1	9;7;7;1;1;1;1;1;1;1;1	Peptidyl-prolyl cis-trans isomerase A;Peptidyl-prolyl cis-trans isomerase A, N-terminally processed;Peptidyl-prolyl cis-trans isomerase	PPIA	sp|P62937|PPIA_HUMAN Peptidyl-prolyl cis-trans isomerase A OS=Homo sapiens OX=9606 GN=PPIA PE=1 SV=2;tr|F8WE65|F8WE65_HUMAN Peptidyl-prolyl cis-trans isomerase OS=Homo sapiens OX=9606 GN=PPIA PE=1 SV=1;tr|C9J5S7|C9J5S7_HUMAN Peptidyl-prolyl cis-trans isome	8	1	0	11	9	9	9	1	2	1	0	2	0	0	0	0	0	0	1	2	3	7	4	3	4	2	3	2	1	2	1	0	2	0	0	0	0	0	0	1	2	3
Q5VTE0;P68104;A0A087WVQ9;A0A087WV01;A0A2U3TZH3;Q05639;A6PW80;Q5JR01;A0A2R8Y660;A0A2R8Y488;A0A2R8YDN5	Q5VTE0;P68104;A0A087WVQ9;A0A087WV01;A0A2U3TZH3;Q05639	6;6;5;4;3;3;2;2;2;2;1	6;6;5;4;3;3;2;2;2;2;1	6;6;5;4;3;3;2;2;2;2;1	Putative elongation factor 1-alpha-like 3;Elongation factor 1-alpha 1;Elongation factor 1-alpha;Elongation factor 1-alpha 2	EEF1A1P5;EEF1A1;EEF1A2	sp|Q5VTE0|EF1A3_HUMAN Putative elongation factor 1-alpha-like 3 OS=Homo sapiens OX=9606 GN=EEF1A1P5 PE=5 SV=1;sp|P68104|EF1A1_HUMAN Elongation factor 1-alpha 1 OS=Homo sapiens OX=9606 GN=EEF1A1 PE=1 SV=1;tr|A0A087WVQ9|A0A087WVQ9_HUMAN Elongation factor 1-a	8	3	1	11	6	6	6	2	3	1	1	2	1	1	0	0	1	1	3	3	3	4	3	2	3	3	2	0	2	3	1	1	2	1	1	0	0	1	1	3	3	3
Q5VW32;F5GXQ0;Q5VW33	Q5VW32;F5GXQ0	13;10;6	13;10;6	13;10;6	BRO1 domain-containing protein BROX	BROX	sp|Q5VW32|BROX_HUMAN BRO1 domain-containing protein BROX OS=Homo sapiens OX=9606 GN=BROX PE=1 SV=1;tr|F5GXQ0|F5GXQ0_HUMAN BRO1 domain- and CAAX motif-containing protein OS=Homo sapiens OX=9606 GN=BROX PE=1 SV=1	8	5	0	3	13	13	13	4	4	3	0	3	0	2	0	0	0	0	0	3	4	6	4	3	3	3	3	1	4	4	3	0	3	0	2	0	0	0	0	0	3	4
Q86YM7;Q86YM6	Q86YM7;Q86YM6	12;7	12;7	10;7	Homer protein homolog 1	HOMER1	sp|Q86YM7|HOME1_HUMAN Homer protein homolog 1 OS=Homo sapiens OX=9606 GN=HOMER1 PE=1 SV=2;tr|Q86YM6|Q86YM6_HUMAN HOMER1F OS=Homo sapiens OX=9606 GN=HOMER1 PE=1 SV=1	8	0	0	2	12	12	10	1	0	0	0	0	0	0	0	0	0	0	0	6	5	8	6	4	3	5	2	1	1	0	0	0	0	0	0	0	0	0	0	0	6	5
Q99961;M0QYE0;M0R0I3;Q99962;M0R2K6	Q99961;M0QYE0;M0R0I3	10;6;6;2;1	10;6;6;2;1	10;6;6;2;1	Endophilin-A2	SH3GL1	sp|Q99961|SH3G1_HUMAN Endophilin-A2 OS=Homo sapiens OX=9606 GN=SH3GL1 PE=1 SV=1;tr|M0QYE0|M0QYE0_HUMAN Endophilin-A2 (Fragment) OS=Homo sapiens OX=9606 GN=SH3GL1 PE=1 SV=8;tr|M0R0I3|M0R0I3_HUMAN Endophilin-A2 (Fragment) OS=Homo sapiens OX=9606 GN=SH3GL1 PE	8	2	0	5	10	10	10	4	2	1	0	1	1	0	0	0	0	0	0	4	5	4	5	3	4	3	3	1	4	2	1	0	1	1	0	0	0	0	0	0	4	5
Q9BRG1;K7EKV4;K7EP45;K7ENE3	Q9BRG1;K7EKV4	7;4;3;2	7;4;3;2	7;4;3;2	Vacuolar protein-sorting-associated protein 25	VPS25	sp|Q9BRG1|VPS25_HUMAN Vacuolar protein-sorting-associated protein 25 OS=Homo sapiens OX=9606 GN=VPS25 PE=1 SV=1;tr|K7EKV4|K7EKV4_HUMAN ESCRT-II complex subunit VPS25 (Fragment) OS=Homo sapiens OX=9606 GN=VPS25 PE=1 SV=1	8	1	0	4	7	7	7	3	0	0	0	0	0	0	0	0	0	0	0	3	5	5	2	4	3	1	3	3	3	0	0	0	0	0	0	0	0	0	0	0	3	5
Q9Y6M4	Q9Y6M4	9	9	3	Casein kinase I isoform gamma-3	CSNK1G3	sp|Q9Y6M4|KC1G3_HUMAN Casein kinase I isoform gamma-3 OS=Homo sapiens OX=9606 GN=CSNK1G3 PE=1 SV=2	8	0	0	1	9	9	3	0	1	0	0	2	0	0	0	0	0	0	0	4	4	5	3	2	2	3	5	1	0	1	0	0	2	0	0	0	0	0	0	0	4	4
U3KPX3;A0A590UJ43;P48729;H0Y9X2;U3KQK7;Q8N752;A0A590UK94;A0A590UJQ7;E5RG27;D6RGE5;U3KQ83	U3KPX3;A0A590UJ43;P48729;H0Y9X2;U3KQK7;Q8N752	11;11;11;6;6;6;3;2;2;2;1	11;11;11;6;6;6;3;2;2;2;1	1;1;1;1;1;0;0;0;0;0;0	Casein kinase I isoform alpha;Casein kinase I isoform alpha-like	CSNK1A1;CSNK1A1L	tr|U3KPX3|U3KPX3_HUMAN Casein kinase I isoform alpha OS=Homo sapiens OX=9606 GN=CSNK1A1 PE=1 SV=2;tr|A0A590UJ43|A0A590UJ43_HUMAN Casein kinase I isoform alpha OS=Homo sapiens OX=9606 GN=CSNK1A1 PE=1 SV=1;sp|P48729|KC1A_HUMAN Casein kinase I isoform alpha O	8	0	0	11	11	11	1	2	2	0	1	1	0	0	0	0	0	0	0	7	8	9	5	5	4	4	3	1	2	2	0	1	1	0	0	0	0	0	0	0	7	8
A0A0C4DGH0;Q5ZPR3;H0YL10;H0YK40;H0YK59;H0YLT8;H0YN85;H0YN29	A0A0C4DGH0;Q5ZPR3;H0YL10	5;5;3;2;2;1;1;1	5;5;3;2;2;1;1;1	5;5;3;2;2;1;1;1	CD276 antigen	CD276	tr|A0A0C4DGH0|A0A0C4DGH0_HUMAN CD276 antigen OS=Homo sapiens OX=9606 GN=CD276 PE=1 SV=1;sp|Q5ZPR3|CD276_HUMAN CD276 antigen OS=Homo sapiens OX=9606 GN=CD276 PE=1 SV=1;tr|H0YL10|H0YL10_HUMAN CD276 antigen (Fragment) OS=Homo sapiens OX=9606 GN=CD276 PE=1 SV=	7	0	0	8	5	5	5	1	1	0	1	0	0	0	0	0	0	0	0	2	3	3	3	1	2	2	2	1	1	1	0	1	0	0	0	0	0	0	0	0	2	3
E9PNW4;A0A2U3TZL5;P13987;H0YET2	E9PNW4;A0A2U3TZL5;P13987;H0YET2	3;3;3;2	3;3;3;2	3;3;3;2	CD59 glycoprotein	CD59	tr|E9PNW4|E9PNW4_HUMAN CD59 glycoprotein OS=Homo sapiens OX=9606 PE=1 SV=1;tr|A0A2U3TZL5|A0A2U3TZL5_HUMAN CD59 glycoprotein (Fragment) OS=Homo sapiens OX=9606 GN=CD59 PE=1 SV=1;sp|P13987|CD59_HUMAN CD59 glycoprotein OS=Homo sapiens OX=9606 GN=CD59 PE=1 SV=	7	0	0	4	3	3	3	1	1	0	2	2	0	0	0	0	0	0	0	2	2	2	2	2	1	2	2	1	1	1	0	2	2	0	0	0	0	0	0	0	2	2
E9PP50;P23528;G3V1A4;E9PK25;E9PS23;E9PQB7;E9PLJ3;Q9Y281	E9PP50;P23528;G3V1A4;E9PK25;E9PS23;E9PQB7	6;6;4;4;3;3;2;2	6;6;4;4;3;3;2;2	6;6;4;4;3;3;2;2	Cofilin-1	CFL1	tr|E9PP50|E9PP50_HUMAN Cofilin, non-muscle isoform (Fragment) OS=Homo sapiens OX=9606 GN=CFL1 PE=1 SV=8;sp|P23528|COF1_HUMAN Cofilin-1 OS=Homo sapiens OX=9606 GN=CFL1 PE=1 SV=3;tr|G3V1A4|G3V1A4_HUMAN Cofilin, non-muscle isoform OS=Homo sapiens OX=9606 GN=C	7	4	2	8	6	6	6	2	4	1	2	1	2	1	0	0	2	2	1	3	5	2	2	2	2	2	0	2	2	4	1	2	1	2	1	0	0	2	2	1	3	5
O14672;H0YNC5	O14672	8;1	8;1	8;1	Disintegrin and metalloproteinase domain-containing protein 10	ADAM10	sp|O14672|ADA10_HUMAN Disintegrin and metalloproteinase domain-containing protein 10 OS=Homo sapiens OX=9606 GN=ADAM10 PE=1 SV=1	7	0	0	2	8	8	8	2	1	0	0	0	0	1	1	0	0	0	0	3	3	6	3	2	3	2	2	1	2	1	0	0	0	0	1	1	0	0	0	0	3	3
O43633;M0R1L7;M0R1T5;M0QXX8	O43633;M0R1L7;M0R1T5	11;7;7;4	11;7;7;4	11;7;7;4	Charged multivesicular body protein 2a	CHMP2A	sp|O43633|CHM2A_HUMAN Charged multivesicular body protein 2a OS=Homo sapiens OX=9606 GN=CHMP2A PE=1 SV=1;tr|M0R1L7|M0R1L7_HUMAN Charged multivesicular body protein 2a (Fragment) OS=Homo sapiens OX=9606 GN=CHMP2A PE=1 SV=1;tr|M0R1T5|M0R1T5_HUMAN Charged mul	7	5	0	4	11	11	11	3	6	5	1	6	3	0	0	0	0	0	0	2	4	5	2	1	2	2	1	2	3	6	5	1	6	3	0	0	0	0	0	0	2	4
P01111;G3V4K2;G3V5T7	P01111	6;2;2	6;2;2	2;0;0	GTPase NRas	NRAS	sp|P01111|RASN_HUMAN GTPase NRas OS=Homo sapiens OX=9606 GN=NRAS PE=1 SV=1	7	1	0	3	6	6	2	3	1	2	0	2	1	1	0	0	0	0	0	5	4	4	2	1	2	4	4	1	3	1	2	0	2	1	1	0	0	0	0	0	5	4
P02786;G3V0E5;F8WBE5;H7C3V5	P02786;G3V0E5	9;7;2;1	9;7;2;1	9;7;2;1	Transferrin receptor protein 1;Transferrin receptor protein 1, serum form	TFRC	sp|P02786|TFR1_HUMAN Transferrin receptor protein 1 OS=Homo sapiens OX=9606 GN=TFRC PE=1 SV=2;tr|G3V0E5|G3V0E5_HUMAN Transferrin receptor protein 1 OS=Homo sapiens OX=9606 GN=TFRC PE=1 SV=1	7	7	1	4	9	9	9	4	2	2	2	3	3	4	0	0	1	1	3	3	5	3	4	4	3	3	1	1	4	2	2	2	3	3	4	0	0	1	1	3	3	5
P04406;E7EUT5	P04406;E7EUT5	6;5	6;5	6;5	Glyceraldehyde-3-phosphate dehydrogenase	GAPDH	sp|P04406|G3P_HUMAN Glyceraldehyde-3-phosphate dehydrogenase OS=Homo sapiens OX=9606 GN=GAPDH PE=1 SV=3;tr|E7EUT5|E7EUT5_HUMAN Glyceraldehyde-3-phosphate dehydrogenase OS=Homo sapiens OX=9606 GN=GAPDH PE=1 SV=1	7	5	2	2	6	6	6	3	2	2	3	2	0	1	0	0	2	1	3	2	2	4	5	3	2	3	2	2	3	2	2	3	2	0	1	0	0	2	1	3	2	2
P51148;K7ERI8;K7ERQ8;F8VVK3;K7ENY4;K7EIP6;F8WCY6;F8WD79;F8VPW9;F8VSF8;F8VWZ7;F8VWU4;F8VVZ0;F8VUA5;P61020;P20339	P51148;K7ERI8;K7ERQ8	6;3;3;2;2;1;1;1;1;1;1;1;1;1;1;1	6;3;3;2;2;1;1;1;1;1;1;1;1;1;1;1	6;3;3;2;2;1;1;1;1;1;1;1;1;1;1;1	Ras-related protein Rab-5C	RAB5C	sp|P51148|RAB5C_HUMAN Ras-related protein Rab-5C OS=Homo sapiens OX=9606 GN=RAB5C PE=1 SV=2;tr|K7ERI8|K7ERI8_HUMAN Uncharacterized protein OS=Homo sapiens OX=9606 PE=4 SV=1;tr|K7ERQ8|K7ERQ8_HUMAN PCAF_N domain-containing protein (Fragment) OS=Homo sapiens	7	0	0	16	6	6	6	1	4	1	0	0	0	0	0	0	0	0	1	2	3	3	2	2	1	2	2	1	1	4	1	0	0	0	0	0	0	0	0	1	2	3
P61586;Q5JR08;P08134;Q5JR07;C9JNR4;E9PQH6;C9JX21;Q5JR05;E9PLA2;C9JRM1;Q5JR06;E9PN11;U3KQA9;U3KQV3	P61586;Q5JR08;P08134;Q5JR07;C9JNR4;E9PQH6;C9JX21;Q5JR05	8;6;6;5;5;5;5;5;2;2;2;2;2;2	8;6;6;5;5;5;5;5;2;2;2;2;2;2	7;5;5;4;4;4;4;4;1;1;1;1;1;1	Transforming protein RhoA;Rho-related GTP-binding protein RhoC	RHOA;RHOC	sp|P61586|RHOA_HUMAN Transforming protein RhoA OS=Homo sapiens OX=9606 GN=RHOA PE=1 SV=1;tr|Q5JR08|Q5JR08_HUMAN Rho-related GTP-binding protein RhoC (Fragment) OS=Homo sapiens OX=9606 GN=RHOC PE=1 SV=8;sp|P08134|RHOC_HUMAN Rho-related GTP-binding protein R	7	1	0	14	8	8	7	3	2	1	0	1	1	1	0	0	0	0	1	5	3	4	3	2	3	2	1	1	3	2	1	0	1	1	1	0	0	0	0	1	5	3
P63000;P15153;B1AH77;B1AH80;B1AH78	P63000;P15153	10;5;4;4;3	10;5;4;4;3	5;1;1;1;1	Ras-related C3 botulinum toxin substrate 1;Ras-related C3 botulinum toxin substrate 2	RAC1;RAC2	sp|P63000|RAC1_HUMAN Ras-related C3 botulinum toxin substrate 1 OS=Homo sapiens OX=9606 GN=RAC1 PE=1 SV=1;sp|P15153|RAC2_HUMAN Ras-related C3 botulinum toxin substrate 2 OS=Homo sapiens OX=9606 GN=RAC2 PE=1 SV=1	7	5	1	5	10	10	5	6	5	1	2	2	1	2	1	1	1	1	2	3	4	5	6	6	4	2	3	1	6	5	1	2	2	1	2	1	1	1	1	2	3	4
Q02413	Q02413	4	4	4	Desmoglein-1	DSG1	sp|Q02413|DSG1_HUMAN Desmoglein-1 OS=Homo sapiens OX=9606 GN=DSG1 PE=1 SV=2	7	0	0	1	4	4	4	0	0	0	1	0	0	0	0	0	0	0	1	2	2	3	2	3	4	1	1	2	0	0	0	1	0	0	0	0	0	0	0	1	2	2
Q14974;J3KTM9;J3QR48;J3QKQ5;J3QRG4	Q14974;J3KTM9	10;7;3;2;1	10;7;3;2;1	10;7;3;2;1	Importin subunit beta-1	KPNB1	sp|Q14974|IMB1_HUMAN Importin subunit beta-1 OS=Homo sapiens OX=9606 GN=KPNB1 PE=1 SV=2;tr|J3KTM9|J3KTM9_HUMAN Importin subunit beta-1 (Fragment) OS=Homo sapiens OX=9606 GN=KPNB1 PE=1 SV=1	7	1	0	5	10	10	10	1	3	0	1	0	0	0	0	0	0	0	0	3	6	6	3	4	2	2	2	0	1	3	0	1	0	0	0	0	0	0	0	0	3	6
Q99808	Q99808	5	5	5	Equilibrative nucleoside transporter 1	SLC29A1	sp|Q99808|S29A1_HUMAN Equilibrative nucleoside transporter 1 OS=Homo sapiens OX=9606 GN=SLC29A1 PE=1 SV=3	7	0	0	1	5	5	5	0	0	0	1	1	0	0	0	0	0	0	0	3	4	5	4	3	3	1	2	0	0	0	0	1	1	0	0	0	0	0	0	0	3	4
A0A1W2PPR8;P01889;F6U0H7;Q5SS57;A0A140TA21;A0A140TA05;A0A140T951;A0A1W2PNZ7;A0A140T9D4;A0A140T9L3;A0A140T9E1;A0A140T942;A0A140T9W2;Q53YP1;A0A140T9U0;A0A140T9M0;P13747;F8W9Z8;A0A140TA12;A0A140T9Z7;A0A140T9X6;A0A140T9W7;A0A140T9W3;A0A140T9D9;A0A140T9C2;A0A140T939;A0A140T9S9;A0A140T9H3;A0A140T9G0;A0A140T9A9;Q31611;A0A0G2JNX1;A0A140T9T1;A0A140T9V0;A0A140T8X0;Q8MH48;Q5RJ85;A0A0G2JPQ3;D0EV57;A0A0G2JPA3…	A0A1W2PPR8;P01889;F6U0H7;Q5SS57	5;5;4;3;2;2;2;2;2;2;2;2;2;2;2;2;2;1;1;1;1;1;1;1;1;1;1;1;1;1;1;1;1;1;1;1;1;1;1;1;1;1;1;1;1;1	5;5;4;3;2;2;2;2;2;2;2;2;2;2;2;2;2;1;1;1;1;1;1;1;1;1;1;1;1;1;1;1;1;1;1;1;1;1;1;1;1;1;1;1;1;1	1;1;1;0;0;0;0;0;0;0;0;0;0;0;0;0;0;0;0;0;0;0;0;0;0;0;0;0;0;0;0;0;0;0;0;0;0;0;0;0;0;0;0;0;0;0	HLA class I histocompatibility antigen, B-7 alpha chain	HLA-B	tr|A0A1W2PPR8|A0A1W2PPR8_HUMAN HLA class I histocompatibility antigen, B alpha chain OS=Homo sapiens OX=9606 GN=HLA-B PE=1 SV=1;sp|P01889|HLAB_HUMAN HLA class I histocompatibility antigen, B alpha chain OS=Homo sapiens OX=9606 GN=HLA-B PE=1 SV=3;tr|F6U0H7|	6	0	0	46	5	5	1	2	1	0	0	1	0	0	0	0	0	0	0	3	2	4	4	2	0	0	2	0	2	1	0	0	1	0	0	0	0	0	0	0	3	2
A6NNI4;A0A2R8Y478;G8JLH6;P21926;A0A087WU13	A6NNI4;A0A2R8Y478;G8JLH6;P21926	4;4;4;4;1	4;4;4;4;1	4;4;4;4;1	Tetraspanin;CD9 antigen	CD9	tr|A6NNI4|A6NNI4_HUMAN Tetraspanin OS=Homo sapiens OX=9606 GN=CD9 PE=1 SV=1;tr|A0A2R8Y478|A0A2R8Y478_HUMAN Tetraspanin OS=Homo sapiens OX=9606 GN=CD9 PE=1 SV=1;tr|G8JLH6|G8JLH6_HUMAN Tetraspanin OS=Homo sapiens OX=9606 GN=CD9 PE=1 SV=2;sp|P21926|CD9_HUMAN	6	1	0	5	4	4	4	1	2	1	0	0	0	0	0	0	1	0	0	2	3	2	2	2	2	2	3	2	1	2	1	0	0	0	0	0	0	1	0	0	2	3
C9J2C4;A0A0J9YX62;O75190;C9JDR7;C9JDX6;F8WCZ4;C9J2P2;E9PH18;C9JB42;C9JN01;C9JRD2;C9JXB9;Q8WWF6;Q8NHS0;P25686	C9J2C4;A0A0J9YX62;O75190;C9JDR7;C9JDX6;F8WCZ4;C9J2P2;E9PH18;C9JB42	4;4;4;3;3;3;3;3;2;1;1;1;1;1;1	4;4;4;3;3;3;3;3;2;1;1;1;1;1;1	4;4;4;3;3;3;3;3;2;1;1;1;1;1;1	DnaJ homolog subfamily B member 6	DNAJB6	tr|C9J2C4|C9J2C4_HUMAN DnaJ homolog subfamily B member 6 (Fragment) OS=Homo sapiens OX=9606 GN=DNAJB6 PE=1 SV=1;tr|A0A0J9YX62|A0A0J9YX62_HUMAN DnaJ homolog subfamily B member 6 OS=Homo sapiens OX=9606 GN=DNAJB6 PE=1 SV=1;sp|O75190|DNJB6_HUMAN DnaJ homolog	6	0	0	15	4	4	4	0	0	0	0	1	0	0	0	0	0	0	0	2	2	3	2	3	2	2	1	1	0	0	0	0	1	0	0	0	0	0	0	0	2	2
O43657;A0A087WYV6;A0A087WZU5	O43657;A0A087WYV6;A0A087WZU5	7;5;5	7;5;5	7;5;5	Tetraspanin-6	TSPAN6	sp|O43657|TSN6_HUMAN Tetraspanin-6 OS=Homo sapiens OX=9606 GN=TSPAN6 PE=1 SV=1;tr|A0A087WYV6|A0A087WYV6_HUMAN Tetraspanin-6 OS=Homo sapiens OX=9606 GN=TSPAN6 PE=1 SV=1;tr|A0A087WZU5|A0A087WZU5_HUMAN Tetraspanin-6 OS=Homo sapiens OX=9606 GN=TSPAN6 PE=1 SV=1	6	0	0	3	7	7	7	2	2	1	1	1	1	1	1	1	0	0	0	3	3	4	2	3	2	1	3	0	2	2	1	1	1	1	1	1	1	0	0	0	3	3
P06733;A0A2R8Y6G6;K7ERS8;A0A2R8Y879;A0A2R8YEM5;K7EM90;A0A2R8Y798;A0A2R8YEG5;A0A2R8Y6I8;F5H1C3;E5RI09;E5RG95;K7EPM1;K7EKN2;E5RGZ4;F5H0C8;P13929;P09104	P06733;A0A2R8Y6G6	12;11;5;5;5;5;4;4;1;1;1;1;1;1;1;1;1;1	12;11;5;5;5;5;4;4;1;1;1;1;1;1;1;1;1;1	12;11;5;5;5;5;4;4;1;1;1;1;1;1;1;1;1;1	Alpha-enolase	ENO1	sp|P06733|ENOA_HUMAN Alpha-enolase OS=Homo sapiens OX=9606 GN=ENO1 PE=1 SV=2;tr|A0A2R8Y6G6|A0A2R8Y6G6_HUMAN 2-phospho-D-glycerate hydro-lyase OS=Homo sapiens OX=9606 GN=ENO1 PE=1 SV=1	6	4	1	18	12	12	12	4	5	3	4	3	0	2	0	0	0	2	2	1	3	4	2	2	2	2	1	1	4	5	3	4	3	0	2	0	0	0	2	2	1	3
P07355;H0YMD0;H0YMU9;H0YN42;H0YMM1;H0YKS4;A6NMY6;H0YKZ7;H0YLV6;H0YMT9;H0YKX9;H0YKV8;H0YKL9;H0YMW4;H0YNP5;H0YM50;H0YMD9;H0YNB8;H0YKN4;H0YNA0;H0YN28;H0YL33;H0YLE2;H0YN52	P07355;H0YMD0;H0YMU9;H0YN42;H0YMM1;H0YKS4;A6NMY6;H0YKZ7;H0YLV6;H0YMT9;H0YKX9	11;9;9;9;8;8;8;6;6;6;6;5;5;5;5;5;4;3;3;3;3;3;2;2	11;9;9;9;8;8;8;6;6;6;6;5;5;5;5;5;4;3;3;3;3;3;2;2	11;9;9;9;8;8;8;6;6;6;6;5;5;5;5;5;4;3;3;3;3;3;2;2	Annexin A2;Annexin;Putative annexin A2-like protein	ANXA2;ANXA2P2	sp|P07355|ANXA2_HUMAN Annexin A2 OS=Homo sapiens OX=9606 GN=ANXA2 PE=1 SV=2;tr|H0YMD0|H0YMD0_HUMAN Annexin (Fragment) OS=Homo sapiens OX=9606 GN=ANXA2 PE=1 SV=1;tr|H0YMU9|H0YMU9_HUMAN Annexin OS=Homo sapiens OX=9606 GN=ANXA2 PE=1 SV=1;tr|H0YN42|H0YN42_HUMA	6	0	1	24	11	11	11	4	4	2	1	0	0	3	0	0	1	0	3	2	4	4	5	3	3	1	0	0	4	4	2	1	0	0	3	0	0	1	0	3	2	4
P11233;H7C3P7;P11234;F8WEQ6;C9JPE8;C9JYR1;C9J6B1;C9JQB3	P11233;H7C3P7;P11234	4;3;2;1;1;1;1;1	4;3;2;1;1;1;1;1	4;3;2;1;1;1;1;1	Ras-related protein Ral-A;Ras-related protein Ral-B	RALA;RALB	sp|P11233|RALA_HUMAN Ras-related protein Ral-A OS=Homo sapiens OX=9606 GN=RALA PE=1 SV=1;tr|H7C3P7|H7C3P7_HUMAN Ras-related protein Ral-A (Fragment) OS=Homo sapiens OX=9606 GN=RALA PE=1 SV=1;sp|P11234|RALB_HUMAN Ras-related protein Ral-B OS=Homo sapiens OX	6	0	0	8	4	4	4	1	1	0	0	0	0	0	0	0	0	0	0	2	2	3	2	1	2	1	2	2	1	1	0	0	0	0	0	0	0	0	0	0	2	2
P81605	P81605	3	3	3	Dermcidin;Survival-promoting peptide;DCD-1	DCD	sp|P81605|DCD_HUMAN Dermcidin OS=Homo sapiens OX=9606 GN=DCD PE=1 SV=2	6	0	1	1	3	3	3	0	0	0	0	0	0	0	0	0	0	0	2	2	1	2	0	3	2	0	1	2	0	0	0	0	0	0	0	0	0	0	0	2	2	1
Q15773;F5H7L5;F5H800;F5H0Y3	Q15773	6;2;2;2	6;2;2;2	6;2;2;2	Myeloid leukemia factor 2	MLF2	sp|Q15773|MLF2_HUMAN Myeloid leukemia factor 2 OS=Homo sapiens OX=9606 GN=MLF2 PE=1 SV=1	6	0	0	4	6	6	6	1	2	0	0	1	0	0	0	0	0	0	0	2	4	5	4	2	3	0	1	1	1	2	0	0	1	0	0	0	0	0	0	0	2	4
Q8WV92;B8ZZL5;H7C3Q6;F8WED5;A0A1W2PP14	Q8WV92;B8ZZL5;H7C3Q6	7;5;5;2;2	7;5;5;2;2	7;5;5;2;2	MIT domain-containing protein 1	MITD1	sp|Q8WV92|MITD1_HUMAN MIT domain-containing protein 1 OS=Homo sapiens OX=9606 GN=MITD1 PE=1 SV=1;tr|B8ZZL5|B8ZZL5_HUMAN MIT domain-containing protein 1 (Fragment) OS=Homo sapiens OX=9606 GN=MITD1 PE=1 SV=1;tr|H7C3Q6|H7C3Q6_HUMAN MIT domain-containing prote	6	0	0	5	7	7	7	2	2	1	1	0	0	0	0	0	0	0	0	3	3	4	4	3	2	2	1	2	2	2	1	1	0	0	0	0	0	0	0	0	3	3
Q8WWI5	Q8WWI5	4	4	4	Choline transporter-like protein 1	SLC44A1	sp|Q8WWI5|CTL1_HUMAN Choline transporter-like protein 1 OS=Homo sapiens OX=9606 GN=SLC44A1 PE=1 SV=1	6	0	0	1	4	4	4	1	1	1	0	0	0	1	0	0	0	0	0	2	1	4	2	3	3	2	2	1	1	1	1	0	0	0	1	0	0	0	0	0	2	1
Q9UJX2;D6RBY8;D6RCF8;H0Y936	Q9UJX2	11;1;1;1	11;1;1;1	11;1;1;1	Cell division cycle protein 23 homolog	CDC23	sp|Q9UJX2|CDC23_HUMAN Cell division cycle protein 23 homolog OS=Homo sapiens OX=9606 GN=CDC23 PE=1 SV=3	6	0	0	4	11	11	11	2	1	0	0	0	0	0	0	0	0	0	0	2	4	5	4	4	2	1	3	0	2	1	0	0	0	0	0	0	0	0	0	0	2	4
Q9Y5K6	Q9Y5K6	13	13	13	CD2-associated protein	CD2AP	sp|Q9Y5K6|CD2AP_HUMAN CD2-associated protein OS=Homo sapiens OX=9606 GN=CD2AP PE=1 SV=1	6	3	0	1	13	13	13	5	3	6	1	0	0	0	0	0	0	0	0	1	4	8	4	3	2	1	1	3	5	3	6	1	0	0	0	0	0	0	0	0	1	4
A0A3B3ISW7;Q86VN1	A0A3B3ISW7;Q86VN1	5;5	5;5	5;5	Vacuolar protein-sorting-associated protein 36	VPS36	tr|A0A3B3ISW7|A0A3B3ISW7_HUMAN ESCRT-II complex subunit VPS36 OS=Homo sapiens OX=9606 GN=VPS36 PE=1 SV=1;sp|Q86VN1|VPS36_HUMAN Vacuolar protein-sorting-associated protein 36 OS=Homo sapiens OX=9606 GN=VPS36 PE=1 SV=1	5	0	0	2	5	5	5	1	1	0	0	1	0	0	0	0	0	0	0	3	4	4	3	3	1	1	3	1	1	1	0	0	1	0	0	0	0	0	0	0	3	4
P07900;G3V2J8;Q14568;Q58FF6;Q58FG0	P07900	17;6;3;2;1	9;2;1;0;1	9;2;1;0;1	Heat shock protein HSP 90-alpha	HSP90AA1	sp|P07900|HS90A_HUMAN Heat shock protein HSP 90-alpha OS=Homo sapiens OX=9606 GN=HSP90AA1 PE=1 SV=5	5	4	0	5	17	9	9	4	5	4	3	5	4	3	0	0	3	1	2	5	8	10	6	5	6	7	3	5	2	1	3	1	2	2	2	0	0	0	0	1	3	3
P26038;V9GZ54	P26038	10;3	10;3	6;2	Moesin	MSN	sp|P26038|MOES_HUMAN Moesin OS=Homo sapiens OX=9606 GN=MSN PE=1 SV=3	5	4	1	2	10	10	6	3	6	1	1	2	2	1	0	0	1	2	4	1	2	2	2	2	1	2	1	1	3	6	1	1	2	2	1	0	0	1	2	4	1	2
P27105;F8VSL7	P27105;F8VSL7	7;4	7;4	7;4	Erythrocyte band 7 integral membrane protein	STOM	sp|P27105|STOM_HUMAN Erythrocyte band 7 integral membrane protein OS=Homo sapiens OX=9606 GN=STOM PE=1 SV=3;tr|F8VSL7|F8VSL7_HUMAN Erythrocyte band 7 integral membrane protein OS=Homo sapiens OX=9606 GN=STOM PE=1 SV=1	5	3	0	2	7	7	7	0	3	0	1	2	1	3	0	0	0	0	1	2	3	3	1	3	2	0	1	1	0	3	0	1	2	1	3	0	0	0	0	1	2	3
P54709;H7C547;F8WBY4;C9JXZ1;C9JA36	P54709;H7C547;F8WBY4;C9JXZ1;C9JA36	4;2;2;2;2	4;2;2;2;2	4;2;2;2;2	Sodium/potassium-transporting ATPase subunit beta-3	ATP1B3	sp|P54709|AT1B3_HUMAN Sodium/potassium-transporting ATPase subunit beta-3 OS=Homo sapiens OX=9606 GN=ATP1B3 PE=1 SV=1;tr|H7C547|H7C547_HUMAN Sodium/potassium-transporting ATPase subunit beta-3 (Fragment) OS=Homo sapiens OX=9606 GN=ATP1B3 PE=1 SV=1;tr|F8WBY	5	0	0	5	4	4	4	1	1	1	1	1	1	1	0	0	0	1	1	2	2	3	2	2	1	2	1	1	1	1	1	1	1	1	1	0	0	0	1	1	2	2
P60842;J3QKZ9;J3QLN6;J3KS25;J3QR64;J3KTB5;J3QL43;J3QS69;J3KT12;E7EQG2;Q14240;J3KT04;J3KS93;E7EMV8;J3KSN7;J3QQP0;E9PBH4;F8WE11;I3L3H2;P38919	P60842;J3QKZ9;J3QLN6;J3KS25;J3QR64;J3KTB5;J3QL43;J3QS69;J3KT12;E7EQG2;Q14240;J3KT04;J3KS93;E7EMV8;J3KSN7	4;3;3;3;3;3;3;3;3;3;3;2;2;2;2;1;1;1;1;1	4;3;3;3;3;3;3;3;3;3;3;2;2;2;2;1;1;1;1;1	4;3;3;3;3;3;3;3;3;3;3;2;2;2;2;1;1;1;1;1	Eukaryotic initiation factor 4A-I;Eukaryotic initiation factor 4A-II;Eukaryotic initiation factor 4A-II, N-terminally processed	EIF4A1;EIF4A2	sp|P60842|IF4A1_HUMAN Eukaryotic initiation factor 4A-I OS=Homo sapiens OX=9606 GN=EIF4A1 PE=1 SV=1;tr|J3QKZ9|J3QKZ9_HUMAN RNA helicase (Fragment) OS=Homo sapiens OX=9606 GN=EIF4A1 PE=1 SV=8;tr|J3QLN6|J3QLN6_HUMAN RNA helicase (Fragment) OS=Homo sapiens OX	5	0	1	20	4	4	4	0	0	0	0	0	0	0	0	0	0	0	2	2	3	4	0	2	0	2	1	0	0	0	0	0	0	0	0	0	0	0	0	2	2	3
P61026	P61026	5	4	4	Ras-related protein Rab-10	RAB10	sp|P61026|RAB10_HUMAN Ras-related protein Rab-10 OS=Homo sapiens OX=9606 GN=RAB10 PE=1 SV=1	5	0	0	1	5	4	4	2	3	1	1	1	0	1	0	0	1	0	1	3	3	4	3	2	3	1	1	1	1	2	1	0	0	0	0	0	0	0	0	0	2	2
P62873;F6UT28;B1AKQ8;F6X3N5;B3KVK2	P62873;F6UT28;B1AKQ8;F6X3N5	8;6;5;5;3	8;6;5;5;3	6;4;3;3;3	Guanine nucleotide-binding protein G(I)/G(S)/G(T) subunit beta-1	GNB1	sp|P62873|GBB1_HUMAN Guanine nucleotide-binding protein G(I)/G(S)/G(T) subunit beta-1 OS=Homo sapiens OX=9606 GN=GNB1 PE=1 SV=3;tr|F6UT28|F6UT28_HUMAN Guanine nucleotide-binding protein G(I)/G(S)/G(T) subunit beta-1 (Fragment) OS=Homo sapiens OX=9606 GN=GN	5	0	0	5	8	8	6	4	4	2	0	2	0	1	0	0	1	1	1	2	4	3	1	1	2	1	2	0	4	4	2	0	2	0	1	0	0	1	1	1	2	4
P63104;E7EX29;E7ESK7;B0AZS6;E5RGE1;E5RIR4;E9PD24;E7EVZ2;B7Z2E6;H0YB80	P63104;E7EX29;E7ESK7;B0AZS6	10;7;6;6;4;4;4;4;4;4	10;7;6;6;4;4;4;4;4;4	8;5;5;5;3;3;3;3;3;3	14-3-3 protein zeta/delta	YWHAZ	sp|P63104|1433Z_HUMAN 14-3-3 protein zeta/delta OS=Homo sapiens OX=9606 GN=YWHAZ PE=1 SV=1;tr|E7EX29|E7EX29_HUMAN 14-3-3 protein zeta/delta (Fragment) OS=Homo sapiens OX=9606 GN=YWHAZ PE=1 SV=1;tr|E7ESK7|E7ESK7_HUMAN 14-3-3 protein zeta/delta (Fragment) OS	5	2	0	10	10	10	8	4	4	0	0	0	1	1	0	0	0	0	3	2	4	4	3	3	0	0	1	0	4	4	0	0	0	1	1	0	0	0	0	3	2	4
Q96H20;D6RJ86;D6RFY6;H0Y8S5;D6RBI1	Q96H20;D6RJ86;D6RFY6;H0Y8S5;D6RBI1	4;3;3;2;2	4;3;3;2;2	4;3;3;2;2	Vacuolar-sorting protein SNF8	SNF8	sp|Q96H20|SNF8_HUMAN Vacuolar-sorting protein SNF8 OS=Homo sapiens OX=9606 GN=SNF8 PE=1 SV=1;tr|D6RJ86|D6RJ86_HUMAN ESCRT-II complex subunit VPS22 OS=Homo sapiens OX=9606 GN=SNF8 PE=1 SV=1;tr|D6RFY6|D6RFY6_HUMAN ESCRT-II complex subunit VPS22 OS=Homo sapie	5	0	0	5	4	4	4	0	0	0	0	0	0	0	0	0	0	0	0	1	4	2	2	2	3	1	1	1	0	0	0	0	0	0	0	0	0	0	0	0	1	4
A0A087WY82;Q9Y624	A0A087WY82;Q9Y624	7;7	7;7	7;7	Junctional adhesion molecule A	F11R	tr|A0A087WY82|A0A087WY82_HUMAN Junctional adhesion molecule 1 OS=Homo sapiens OX=9606 GN=F11R PE=1 SV=1;sp|Q9Y624|JAM1_HUMAN Junctional adhesion molecule A OS=Homo sapiens OX=9606 GN=F11R PE=1 SV=1	4	0	0	2	7	7	7	2	3	1	0	1	0	0	0	0	0	0	0	1	2	2	1	3	1	2	3	1	2	3	1	0	1	0	0	0	0	0	0	0	1	2
C9J0A7;Q9UQN3;A0A087WW88	C9J0A7;Q9UQN3	7;7;1	7;7;1	7;7;1	Charged multivesicular body protein 2b	CHMP2B	tr|C9J0A7|C9J0A7_HUMAN Charged multivesicular body protein 2b OS=Homo sapiens OX=9606 GN=CHMP2B PE=1 SV=1;sp|Q9UQN3|CHM2B_HUMAN Charged multivesicular body protein 2b OS=Homo sapiens OX=9606 GN=CHMP2B PE=1 SV=1	4	3	0	3	7	7	7	5	4	2	1	2	0	0	0	0	0	0	0	2	2	2	2	2	2	1	2	1	5	4	2	1	2	0	0	0	0	0	0	0	2	2
E9PLD0;E7END7;Q9H0U4;Q92928;P62820;A0A2R8YDI9;H0YLJ8;H0YL94;G3V196;A0A2R8YFB8;P59190	E9PLD0;E7END7;Q9H0U4;Q92928;P62820	3;3;3;3;3;1;1;1;1;1;1	2;2;2;2;2;0;0;0;0;0;0	2;2;2;2;2;0;0;0;0;0;0	Ras-related protein Rab-1B;Putative Ras-related protein Rab-1C;Ras-related protein Rab-1A	RAB1B;RAB1A;RAB1C	tr|E9PLD0|E9PLD0_HUMAN Ras-related protein Rab-1B OS=Homo sapiens OX=9606 GN=RAB1B PE=1 SV=1;tr|E7END7|E7END7_HUMAN Ras-related protein Rab-1A OS=Homo sapiens OX=9606 GN=RAB1A PE=1 SV=1;sp|Q9H0U4|RAB1B_HUMAN Ras-related protein Rab-1B OS=Homo sapiens OX=96	4	0	0	11	3	2	2	2	2	0	1	1	0	1	0	0	1	0	1	2	3	3	3	3	2	1	2	1	1	1	0	0	0	0	0	0	0	0	0	0	1	2
P05556;C9JPK5;Q5T3E6;E9PLR6;E7EUI6;E7EQW5;H7C4N8;E7ERX5	P05556	11;2;2;2;2;2;1;1	11;2;2;2;2;2;1;1	11;2;2;2;2;2;1;1	Integrin beta-1	ITGB1	sp|P05556|ITB1_HUMAN Integrin beta-1 OS=Homo sapiens OX=9606 GN=ITGB1 PE=1 SV=2	4	4	0	8	11	11	11	6	3	1	2	1	1	3	0	0	0	0	0	1	3	7	4	3	1	1	1	1	6	3	1	2	1	1	3	0	0	0	0	0	1	3
P35579;P35749;B1AH99;Q5BKV1;A0A2R8Y4C3;A0A0C4DFM8;A0A494C024;P35580	P35579	12;2;1;1;1;1;1;1	12;2;1;1;1;1;1;1	10;0;1;1;0;0;0;1	Myosin-9	MYH9	sp|P35579|MYH9_HUMAN Myosin-9 OS=Homo sapiens OX=9606 GN=MYH9 PE=1 SV=4	4	0	1	8	12	12	10	1	2	0	0	0	0	3	0	0	0	0	4	5	4	4	3	1	0	1	0	0	1	2	0	0	0	0	3	0	0	0	0	4	5	4
P50995;H0Y6E1	P50995	9;3	9;3	9;3	Annexin A11	ANXA11	sp|P50995|ANX11_HUMAN Annexin A11 OS=Homo sapiens OX=9606 GN=ANXA11 PE=1 SV=1	4	2	2	2	9	9	9	3	3	1	1	1	0	0	0	0	2	2	3	2	4	4	1	1	0	2	2	0	3	3	1	1	1	0	0	0	0	2	2	3	2	4
P63244;H0YAF8;D6R9Z1;D6RAC2;J3KPE3;H0Y8W2;D6R9L0;D6REE5;H0Y8R5;D6RFX4;D6RHH4;H0YAM7;D6RF23;D6RAU2;E9PD14;D6RBD0;D6RFZ9;D6RGK8;H0Y9P0;D6R909	P63244;H0YAF8;D6R9Z1;D6RAC2;J3KPE3;H0Y8W2;D6R9L0;D6REE5;H0Y8R5;D6RFX4;D6RHH4;H0YAM7	5;4;4;4;4;4;4;4;3;3;3;3;2;2;2;2;2;1;1;1	5;4;4;4;4;4;4;4;3;3;3;3;2;2;2;2;2;1;1;1	5;4;4;4;4;4;4;4;3;3;3;3;2;2;2;2;2;1;1;1	Guanine nucleotide-binding protein subunit beta-2-like 1;Guanine nucleotide-binding protein subunit beta-2-like 1, N-terminally processed	GNB2L1	sp|P63244|RACK1_HUMAN Receptor of activated protein C kinase 1 OS=Homo sapiens OX=9606 GN=RACK1 PE=1 SV=3;tr|H0YAF8|H0YAF8_HUMAN Receptor of-activated protein C kinase 1 (Fragment) OS=Homo sapiens OX=9606 GN=RACK1 PE=1 SV=1;tr|D6R9Z1|D6R9Z1_HUMAN Receptor	4	0	0	20	5	5	5	0	0	0	0	0	0	0	0	0	0	0	0	3	0	5	3	1	2	0	0	0	0	0	0	0	0	0	0	0	0	0	0	0	3	0
Q5T749	Q5T749	6	6	6	Keratinocyte proline-rich protein	KPRP	sp|Q5T749|KPRP_HUMAN Keratinocyte proline-rich protein OS=Homo sapiens OX=9606 GN=KPRP PE=1 SV=1	4	0	0	1	6	6	6	0	0	0	0	0	0	0	0	0	0	0	0	0	3	0	3	1	4	3	0	0	0	0	0	0	0	0	0	0	0	0	0	0	0	3
Q99963	Q99963	4	4	4	Endophilin-A3	SH3GL3	sp|Q99963|SH3G3_HUMAN Endophilin-A3 OS=Homo sapiens OX=9606 GN=SH3GL3 PE=1 SV=1	4	0	0	1	4	4	4	0	0	0	0	0	0	0	0	0	0	0	0	2	2	3	2	2	0	1	0	1	0	0	0	0	0	0	0	0	0	0	0	0	2	2
Q9UHD9;Q9UMX0	Q9UHD9	6;1	6;1	6;1	Ubiquilin-2	UBQLN2	sp|Q9UHD9|UBQL2_HUMAN Ubiquilin-2 OS=Homo sapiens OX=9606 GN=UBQLN2 PE=1 SV=2	4	0	0	2	6	6	6	1	1	0	0	0	0	0	0	0	0	0	0	2	3	4	1	3	1	0	1	0	1	1	0	0	0	0	0	0	0	0	0	0	2	3
Q9Y5X1	Q9Y5X1	5	5	5	Sorting nexin-9	SNX9	sp|Q9Y5X1|SNX9_HUMAN Sorting nexin-9 OS=Homo sapiens OX=9606 GN=SNX9 PE=1 SV=1	4	0	0	1	5	5	5	0	0	1	1	0	0	0	0	0	0	0	0	2	1	4	2	2	4	0	1	1	0	0	1	1	0	0	0	0	0	0	0	0	2	1
A0A494C175;A0A0S2Z4A4;P58340;A0A494C127;A0A494C1S3;A0A494C1P6	A0A494C175;A0A0S2Z4A4;P58340;A0A494C127;A0A494C1S3;A0A494C1P6	3;3;3;2;2;2	3;3;3;2;2;2	3;3;3;2;2;2	Myeloid leukemia factor 1	MLF1	tr|A0A494C175|A0A494C175_HUMAN Myeloid leukemia factor 1 OS=Homo sapiens OX=9606 GN=MLF1 PE=1 SV=1;tr|A0A0S2Z4A4|A0A0S2Z4A4_HUMAN Myeloid leukemia factor 1 (Fragment) OS=Homo sapiens OX=9606 GN=MLF1 PE=1 SV=1;sp|P58340|MLF1_HUMAN Myeloid leukemia factor 1	3	0	0	6	3	3	3	0	0	0	0	0	0	0	0	0	0	0	0	2	1	2	1	2	1	2	1	0	0	0	0	0	0	0	0	0	0	0	0	0	2	1
B1ANR0;Q13310;H0Y5F5;B1ANR1;H0YEU6;H0YCC8	B1ANR0;Q13310;H0Y5F5;B1ANR1	11;11;7;6;4;1	4;4;3;1;2;1	4;4;3;1;2;1	Polyadenylate-binding protein;Polyadenylate-binding protein 4	PABPC4	tr|B1ANR0|B1ANR0_HUMAN Polyadenylate-binding protein OS=Homo sapiens OX=9606 GN=PABPC4 PE=1 SV=1;sp|Q13310|PABP4_HUMAN Polyadenylate-binding protein 4 OS=Homo sapiens OX=9606 GN=PABPC4 PE=1 SV=1;tr|H0Y5F5|H0Y5F5_HUMAN Polyadenylate-binding protein (Fragmen	3	0	0	6	11	4	4	6	7	1	1	3	2	1	0	0	0	0	0	5	3	5	4	3	1	3	2	2	1	2	0	0	2	0	0	0	0	0	0	0	2	1
B5MDF5;P62826;F5H018;J3KQE5;B4DV51;A0A087X0W0;H0YFC6	B5MDF5;P62826;F5H018;J3KQE5;B4DV51	5;5;4;4;3;1;1	5;5;4;4;3;1;1	5;5;4;4;3;1;1	GTP-binding nuclear protein Ran	RAN	tr|B5MDF5|B5MDF5_HUMAN GTP-binding nuclear protein Ran OS=Homo sapiens OX=9606 GN=RAN PE=1 SV=1;sp|P62826|RAN_HUMAN GTP-binding nuclear protein Ran OS=Homo sapiens OX=9606 GN=RAN PE=1 SV=3;tr|F5H018|F5H018_HUMAN GTP-binding nuclear protein Ran (Fragment) O	3	0	0	7	5	5	5	0	1	1	0	0	0	0	0	0	0	0	1	2	1	3	0	1	1	1	2	0	0	1	1	0	0	0	0	0	0	0	0	1	2	1
F8VNT9;F8VV56;F8W022;F8VWK8;P08962	F8VNT9;F8VV56;F8W022;F8VWK8;P08962	2;2;2;2;2	2;2;2;2;2	2;2;2;2;2	Tetraspanin;CD63 antigen	CD63	tr|F8VNT9|F8VNT9_HUMAN CD63 antigen (Fragment) OS=Homo sapiens OX=9606 GN=CD63 PE=1 SV=1;tr|F8VV56|F8VV56_HUMAN CD63 antigen OS=Homo sapiens OX=9606 GN=CD63 PE=1 SV=1;tr|F8W022|F8W022_HUMAN Tetraspanin (Fragment) OS=Homo sapiens OX=9606 GN=CD63 PE=1 SV=1;t	3	0	0	5	2	2	2	0	0	0	0	0	0	0	0	0	0	0	1	2	2	2	1	1	2	1	0	1	0	0	0	0	0	0	0	0	0	0	0	1	2	2
H3BLV0;B1AP13;H7BY55;P08174;B1AP15;A0A2R8YDY3;A0A2R8YEC5	H3BLV0;B1AP13;H7BY55;P08174	5;5;5;5;2;1;1	5;5;5;5;2;1;1	5;5;5;5;2;1;1	Complement decay-accelerating factor	CD55	tr|H3BLV0|H3BLV0_HUMAN Complement decay-accelerating factor (Fragment) OS=Homo sapiens OX=9606 GN=CD55 PE=1 SV=1;tr|B1AP13|B1AP13_HUMAN Complement decay-accelerating factor OS=Homo sapiens OX=9606 GN=CD55 PE=1 SV=1;tr|H7BY55|H7BY55_HUMAN Complement decay-a	3	0	0	7	5	5	5	1	1	0	0	0	0	0	0	0	0	0	0	1	3	3	3	1	0	1	0	0	1	1	0	0	0	0	0	0	0	0	0	0	1	3
H7C3I1;F6VDH7;Q3KNR6;P50502;Q8IZP2;Q8NFI4	H7C3I1;F6VDH7;Q3KNR6;P50502;Q8IZP2;Q8NFI4	5;5;5;5;4;4	5;5;5;5;4;4	5;5;5;5;4;4	Hsc70-interacting protein;Putative protein FAM10A4;Putative protein FAM10A5	ST13;ST13P4;ST13P5	tr|H7C3I1|H7C3I1_HUMAN Hsc70-interacting protein (Fragment) OS=Homo sapiens OX=9606 GN=ST13 PE=1 SV=1;tr|F6VDH7|F6VDH7_HUMAN Hsc70-interacting protein (Fragment) OS=Homo sapiens OX=9606 GN=ST13 PE=1 SV=1;tr|Q3KNR6|Q3KNR6_HUMAN Hsc70-interacting protein OS=	3	0	0	6	5	5	5	1	3	1	1	2	2	1	0	0	0	0	1	2	2	2	0	2	1	2	1	1	1	3	1	1	2	2	1	0	0	0	0	1	2	2
O95630;C9JK83;C9JEK5;F5H5B9;C9JZ93	O95630;C9JK83	8;5;2;2;1	8;5;2;2;1	8;5;2;2;1	STAM-binding protein	STAMBP	sp|O95630|STABP_HUMAN STAM-binding protein OS=Homo sapiens OX=9606 GN=STAMBP PE=1 SV=1;tr|C9JK83|C9JK83_HUMAN STAM-binding protein (Fragment) OS=Homo sapiens OX=9606 GN=STAMBP PE=1 SV=1	3	2	0	5	8	8	8	5	2	1	2	1	2	0	0	0	0	0	0	0	2	3	2	0	1	0	1	0	5	2	1	2	1	2	0	0	0	0	0	0	0	2
P14923;C9JTX4;C9J826;C9JK18;C9JKY1	P14923;C9JTX4;C9J826;C9JK18;C9JKY1	6;3;3;3;3	6;3;3;3;3	6;3;3;3;3	Junction plakoglobin	JUP	sp|P14923|PLAK_HUMAN Junction plakoglobin OS=Homo sapiens OX=9606 GN=JUP PE=1 SV=3;tr|C9JTX4|C9JTX4_HUMAN Junction plakoglobin (Fragment) OS=Homo sapiens OX=9606 GN=JUP PE=1 SV=1;tr|C9J826|C9J826_HUMAN Junction plakoglobin (Fragment) OS=Homo sapiens OX=960	3	0	0	5	6	6	6	0	0	0	0	0	0	1	0	0	0	0	2	2	3	1	3	1	2	1	1	0	0	0	0	0	0	0	1	0	0	0	0	2	2	3
P68366;C9JEV8;C9JQ00;C9JJQ8;C9JDL2	P68366	14;6;6;6;5	5;4;4;4;3	5;4;4;4;3	Tubulin alpha-4A chain	TUBA4A	sp|P68366|TBA4A_HUMAN Tubulin alpha-4A chain OS=Homo sapiens OX=9606 GN=TUBA4A PE=1 SV=1	3	3	1	5	14	5	5	7	7	6	3	7	4	5	0	0	1	1	7	6	10	11	6	5	4	3	6	3	2	3	1	1	3	0	1	0	0	0	0	2	2	3
Q01650	Q01650	4	4	4	Large neutral amino acids transporter small subunit 1	SLC7A5	sp|Q01650|LAT1_HUMAN Large neutral amino acids transporter small subunit 1 OS=Homo sapiens OX=9606 GN=SLC7A5 PE=1 SV=2	3	1	0	1	4	4	4	3	1	1	1	2	0	2	0	0	0	0	0	2	1	3	2	1	1	2	1	0	3	1	1	1	2	0	2	0	0	0	0	0	2	1
Q15365	Q15365	5	3	3	Poly(rC)-binding protein 1	PCBP1	sp|Q15365|PCBP1_HUMAN Poly(rC)-binding protein 1 OS=Homo sapiens OX=9606 GN=PCBP1 PE=1 SV=2	3	3	0	1	5	3	3	3	2	1	3	0	1	1	0	0	0	0	0	4	3	3	2	2	3	1	2	1	3	2	0	2	0	0	0	0	0	0	0	0	2	2
Q96EY5;E9PQA6;E9PLZ8;M0QZK6;E9PLL0;E9PJW8	Q96EY5;E9PQA6;E9PLZ8;M0QZK6	10;8;6;5;4;1	10;8;6;5;4;1	10;8;6;5;4;1	Multivesicular body subunit 12A	MVB12A	sp|Q96EY5|MB12A_HUMAN Multivesicular body subunit 12A OS=Homo sapiens OX=9606 GN=MVB12A PE=1 SV=1;tr|E9PQA6|E9PQA6_HUMAN Multivesicular body subunit 12A OS=Homo sapiens OX=9606 GN=MVB12A PE=1 SV=1;tr|E9PLZ8|E9PLZ8_HUMAN ESCRT-I complex subunit MVB12A (Frag	3	3	0	6	10	10	10	3	5	3	1	2	0	0	0	0	0	0	0	3	4	5	1	2	2	1	0	1	3	5	3	1	2	0	0	0	0	0	0	0	3	4
Q9NZZ3	Q9NZZ3	6	6	6	Charged multivesicular body protein 5	CHMP5	sp|Q9NZZ3|CHMP5_HUMAN Charged multivesicular body protein 5 OS=Homo sapiens OX=9606 GN=CHMP5 PE=1 SV=1	3	2	0	1	6	6	6	4	4	0	1	0	1	1	0	0	0	0	0	1	1	4	1	0	2	1	2	0	4	4	0	1	0	1	1	0	0	0	0	0	1	1
Q9UN37;I3L4J1	Q9UN37;I3L4J1	10;8	7;5	7;5	Vacuolar protein sorting-associated protein 4A	VPS4A	sp|Q9UN37|VPS4A_HUMAN Vacuolar protein sorting-associated protein 4A OS=Homo sapiens OX=9606 GN=VPS4A PE=1 SV=1;tr|I3L4J1|I3L4J1_HUMAN Vesicle-fusing ATPase (Fragment) OS=Homo sapiens OX=9606 PE=1 SV=3	3	1	0	2	10	7	7	4	4	2	1	3	2	2	0	0	0	0	1	2	4	5	2	2	1	2	4	1	2	2	1	1	2	1	1	0	0	0	0	0	1	3
A0A0U1RR32;A0A0U1RRH7;Q99878;Q96KK5;Q9BTM1;Q16777;Q6FI13;P20671;P0C0S8;H0YFX9;A0A3B3IS11;Q96QV6;P16104;C9J0D1;A0A494C189;Q71UI9;P0C0S5;C9J386;Q8IUE6	A0A0U1RR32;A0A0U1RRH7;Q99878;Q96KK5;Q9BTM1;Q16777;Q6FI13;P20671;P0C0S8;H0YFX9;A0A3B3IS11;Q96QV6;P16104	5;5;5;5;5;5;5;5;5;4;3;3;3;2;2;2;2;1;1	5;5;5;5;5;5;5;5;5;4;3;3;3;2;2;2;2;1;1	1;1;1;1;1;1;1;1;1;1;0;0;0;0;0;0;0;0;0	Histone H2A type 1-J;Histone H2A type 1-H;Histone H2A.J;Histone H2A type 2-C;Histone H2A type 2-A;Histone H2A type 1-D;Histone H2A type 1;Histone H2A;Histone H2A type 1-A;Histone H2AX	HIST1H2AJ;HIST1H2AH;H2AFJ;HIST2H2AC;HIST2H2AA3;HIST1H2AD;HIST1H2AG;HIST1H2AA;H2AFX	tr|A0A0U1RR32|A0A0U1RR32_HUMAN Histone H2A OS=Homo sapiens OX=9606 GN=hCG_2039566 PE=3 SV=1;tr|A0A0U1RRH7|A0A0U1RRH7_HUMAN Histone H2A OS=Homo sapiens OX=9606 PE=3 SV=1;sp|Q99878|H2A1J_HUMAN Histone H2A type 1-J OS=Homo sapiens OX=9606 GN=H2AC14 PE=1 SV=3;	2	4	0	19	5	5	1	2	2	1	0	2	0	2	1	2	3	2	3	0	1	2	0	0	0	1	2	1	2	2	1	0	2	0	2	1	2	3	2	3	0	1
A0A2R8Y484;Q08722	A0A2R8Y484;Q08722	2;2	2;2	2;2	Leukocyte surface antigen CD47	CD47	tr|A0A2R8Y484|A0A2R8Y484_HUMAN Integrin-associated protein (Fragment) OS=Homo sapiens OX=9606 GN=CD47 PE=1 SV=1;sp|Q08722|CD47_HUMAN Leukocyte surface antigen CD47 OS=Homo sapiens OX=9606 GN=CD47 PE=1 SV=1	2	0	0	2	2	2	2	0	0	0	0	0	0	0	0	0	0	0	0	1	0	2	1	1	2	0	0	0	0	0	0	0	0	0	0	0	0	0	0	0	1	0
A0A3B3IST1;B5MD23;O75954	A0A3B3IST1;B5MD23;O75954	2;2;2	2;2;2	2;2;2	Tetraspanin;Tetraspanin-9	TSPAN9	tr|A0A3B3IST1|A0A3B3IST1_HUMAN Tetraspanin-9 (Fragment) OS=Homo sapiens OX=9606 GN=TSPAN9 PE=1 SV=1;tr|B5MD23|B5MD23_HUMAN Tetraspanin OS=Homo sapiens OX=9606 GN=TSPAN9 PE=1 SV=1;sp|O75954|TSN9_HUMAN Tetraspanin-9 OS=Homo sapiens OX=9606 GN=TSPAN9 PE=1 SV=	2	0	0	3	2	2	2	0	0	0	0	0	0	0	0	0	0	0	0	1	2	0	1	0	2	0	0	0	0	0	0	0	0	0	0	0	0	0	0	0	1	2
F8VUA2;F8VVT7;Q9HD42	F8VUA2;F8VVT7;Q9HD42	3;3;3	3;3;3	3;3;3	Charged multivesicular body protein 1a	CHMP1A	tr|F8VUA2|F8VUA2_HUMAN Charged multivesicular body protein 1a OS=Homo sapiens OX=9606 GN=CHMP1A PE=1 SV=1;tr|F8VVT7|F8VVT7_HUMAN Charged multivesicular body protein 1a OS=Homo sapiens OX=9606 GN=CHMP1A PE=1 SV=1;sp|Q9HD42|CHM1A_HUMAN Charged multivesicular	2	0	0	3	3	3	3	1	1	0	0	1	1	0	0	0	0	0	0	2	1	1	2	2	1	1	1	0	1	1	0	0	1	1	0	0	0	0	0	0	2	1
H3BMU1;H3BUI0;P53990;H3BQF7;J3KR23;F5GXM3;H3BPP6;H3BRE2	H3BMU1;H3BUI0;P53990;H3BQF7;J3KR23;F5GXM3	10;10;10;9;7;5;3;3	10;10;10;9;7;5;3;3	10;10;10;9;7;5;3;3	IST1 homolog	IST1	tr|H3BMU1|H3BMU1_HUMAN IST1 homolog (Fragment) OS=Homo sapiens OX=9606 GN=IST1 PE=1 SV=1;tr|H3BUI0|H3BUI0_HUMAN IST1 homolog (Fragment) OS=Homo sapiens OX=9606 GN=IST1 PE=1 SV=1;sp|P53990|IST1_HUMAN IST1 homolog OS=Homo sapiens OX=9606 GN=IST1 PE=1 SV=1;tr	2	5	0	8	10	10	10	6	7	2	2	3	0	2	0	0	0	0	1	2	2	2	1	2	1	2	1	1	6	7	2	2	3	0	2	0	0	0	0	1	2	2
J3KT86;Q96GD4;J3QLN8;J3QR41;J3KTD6;J3KRJ2;J3KRF8	J3KT86;Q96GD4;J3QLN8;J3QR41;J3KTD6	5;5;4;3;3;2;1	4;4;3;2;2;1;1	4;4;3;2;2;1;1	Aurora kinase B	AURKB	tr|J3KT86|J3KT86_HUMAN Aurora 1 (Fragment) OS=Homo sapiens OX=9606 GN=AURKB PE=1 SV=1;sp|Q96GD4|AURKB_HUMAN Aurora kinase B OS=Homo sapiens OX=9606 GN=AURKB PE=1 SV=3;tr|J3QLN8|J3QLN8_HUMAN Aurora 1 (Fragment) OS=Homo sapiens OX=9606 GN=AURKB PE=1 SV=8;tr|	2	0	0	7	5	4	4	1	0	0	0	0	0	1	0	0	0	0	0	2	4	2	3	2	0	1	1	0	1	0	0	0	0	0	0	0	0	0	0	0	1	3
P08758;E9PHT9;D6RBE9;D6RCN3	P08758;E9PHT9;D6RBE9	9;5;5;1	9;5;5;1	3;3;1;1	Annexin A5;Annexin	ANXA5	sp|P08758|ANXA5_HUMAN Annexin A5 OS=Homo sapiens OX=9606 GN=ANXA5 PE=1 SV=2;tr|E9PHT9|E9PHT9_HUMAN Annexin OS=Homo sapiens OX=9606 GN=ANXA5 PE=1 SV=1;tr|D6RBE9|D6RBE9_HUMAN Annexin OS=Homo sapiens OX=9606 GN=ANXA5 PE=1 SV=1	2	2	0	4	9	9	3	3	3	1	1	1	0	0	0	0	0	1	6	0	2	3	1	0	0	1	0	1	3	3	1	1	1	0	0	0	0	0	1	6	0	2
P11166;A0A590UJ26	P11166	5;1	5;1	5;1	Solute carrier family 2, facilitated glucose transporter member 1	SLC2A1	sp|P11166|GTR1_HUMAN Solute carrier family 2, facilitated glucose transporter member 1 OS=Homo sapiens OX=9606 GN=SLC2A1 PE=1 SV=2	2	0	0	2	5	5	5	2	1	0	1	1	0	2	0	0	1	0	1	1	2	2	0	1	0	1	2	0	2	1	0	1	1	0	2	0	0	1	0	1	1	2
P47929	P47929	3	3	3	Galectin-7	LGALS7	sp|P47929|LEG7_HUMAN Galectin-7 OS=Homo sapiens OX=9606 GN=LGALS7 PE=1 SV=2	2	0	0	1	3	3	3	0	0	0	0	0	0	0	0	0	0	0	0	0	0	0	3	0	0	2	0	0	0	0	0	0	0	0	0	0	0	0	0	0	0	0
P50570;K7EMQ3;K7EPK9;A0A1B0GUX5;A0A1B0GU67;A0A0D9SFB1;A0A0U1RQP1;A0A0D9SFE4;Q05193	P50570	8;2;1;1;1;1;1;1;1	8;2;1;1;1;1;1;1;1	6;2;0;1;1;1;1;1;1	Dynamin-2	DNM2	sp|P50570|DYN2_HUMAN Dynamin-2 OS=Homo sapiens OX=9606 GN=DNM2 PE=1 SV=2	2	0	0	9	8	8	6	1	2	0	2	1	0	1	1	0	0	0	0	3	4	4	2	0	0	2	1	1	1	2	0	2	1	0	1	1	0	0	0	0	3	4
P60953;Q5JYX0;A0A590UJK8	P60953	7;2;2	6;1;1	6;1;1	Cell division control protein 42 homolog	CDC42	sp|P60953|CDC42_HUMAN Cell division control protein 42 homolog OS=Homo sapiens OX=9606 GN=CDC42 PE=1 SV=2	2	3	0	3	7	6	6	3	7	2	0	0	1	1	0	0	0	0	0	1	1	2	2	2	1	1	2	1	3	6	2	0	0	1	1	0	0	0	0	0	1	1
P61019;E9PKL7;A0A3B3ITL1;Q8WUD1;H7C125;Q6PIK3	P61019;E9PKL7;A0A3B3ITL1;Q8WUD1	3;2;2;2;1;1	3;2;2;2;1;1	3;2;2;2;1;1	Ras-related protein Rab-2A;Ras-related protein Rab-2B	RAB2A;RAB2B	sp|P61019|RAB2A_HUMAN Ras-related protein Rab-2A OS=Homo sapiens OX=9606 GN=RAB2A PE=1 SV=1;tr|E9PKL7|E9PKL7_HUMAN Ras-related protein Rab-2A OS=Homo sapiens OX=9606 GN=RAB2A PE=1 SV=1;tr|A0A3B3ITL1|A0A3B3ITL1_HUMAN Ras-related protein Rab-2B OS=Homo sapie	2	0	0	6	3	3	3	0	0	0	0	0	0	0	0	0	0	0	0	1	3	3	0	1	0	0	0	0	0	0	0	0	0	0	0	0	0	0	0	0	1	3
P62942;Q1JUQ3;Q1JUQ5;A0A087WTS4;Q5W0X3;A0A087WV48;A0A087WZM5	P62942;Q1JUQ3;Q1JUQ5;A0A087WTS4;Q5W0X3;A0A087WV48;A0A087WZM5	2;1;1;1;1;1;1	2;1;1;1;1;1;1	2;1;1;1;1;1;1	Peptidyl-prolyl cis-trans isomerase FKBP1A;Peptidyl-prolyl cis-trans isomerase	FKBP1A;FKBP12-Exin;FKBP12-Exip2	sp|P62942|FKB1A_HUMAN Peptidyl-prolyl cis-trans isomerase FKBP1A OS=Homo sapiens OX=9606 GN=FKBP1A PE=1 SV=2;tr|Q1JUQ3|Q1JUQ3_HUMAN FK506 binding protein12 OS=Homo sapiens OX=9606 GN=FKBP1A PE=2 SV=1;tr|Q1JUQ5|Q1JUQ5_HUMAN Peptidylprolyl isomerase OS=Homo	2	0	0	7	2	2	2	1	0	0	0	0	0	0	0	0	0	0	0	2	1	2	1	1	0	0	1	1	1	0	0	0	0	0	0	0	0	0	0	0	2	1
P78310	P78310	2	2	2	Coxsackievirus and adenovirus receptor	CXADR	sp|P78310|CXAR_HUMAN Coxsackievirus and adenovirus receptor OS=Homo sapiens OX=9606 GN=CXADR PE=1 SV=1	2	0	0	1	2	2	2	0	0	0	0	1	0	0	0	0	0	0	0	2	0	2	0	1	1	1	0	1	0	0	0	0	1	0	0	0	0	0	0	0	2	0
Q8WWK9;C9J7Y4	Q8WWK9	3;1	3;1	3;1	Cytoskeleton-associated protein 2	CKAP2	sp|Q8WWK9|CKAP2_HUMAN Cytoskeleton-associated protein 2 OS=Homo sapiens OX=9606 GN=CKAP2 PE=1 SV=1	2	0	0	2	3	3	3	1	1	0	0	0	0	0	0	0	0	0	0	0	2	1	0	2	0	0	0	0	1	1	0	0	0	0	0	0	0	0	0	0	0	2
Q96CF2	Q96CF2	4	3	3	Charged multivesicular body protein 4c	CHMP4C	sp|Q96CF2|CHM4C_HUMAN Charged multivesicular body protein 4c OS=Homo sapiens OX=9606 GN=CHMP4C PE=1 SV=1	2	0	0	1	4	3	3	2	3	0	1	0	0	0	0	0	0	0	0	1	2	2	0	0	0	0	1	0	2	2	0	1	0	0	0	0	0	0	0	0	1	2
Q9BWD3;A6ZKI3;Q17RB0	Q9BWD3;A6ZKI3	4;2;1	4;2;1	4;2;1	Protein FAM127B;Protein FAM127A	FAM127B;FAM127A	sp|Q9BWD3|RTL8A_HUMAN Retrotransposon Gag-like protein 8A OS=Homo sapiens OX=9606 GN=RTL8A PE=1 SV=3;sp|A6ZKI3|RTL8C_HUMAN Retrotransposon Gag-like protein 8C OS=Homo sapiens OX=9606 GN=RTL8C PE=1 SV=1	2	0	0	3	4	4	4	0	0	0	0	0	0	0	0	0	0	0	0	1	2	3	0	1	1	2	0	0	0	0	0	0	0	0	0	0	0	0	0	0	1	2
Q9NSB8;H0YNR9;M0R2T8;M0QZN1;M0R2U7;Q9NSC5	Q9NSB8	9;2;1;1;1;1	7;2;0;0;0;0	7;2;0;0;0;0	Homer protein homolog 2	HOMER2	sp|Q9NSB8|HOME2_HUMAN Homer protein homolog 2 OS=Homo sapiens OX=9606 GN=HOMER2 PE=1 SV=1	2	0	0	6	9	7	7	3	3	1	1	2	2	0	0	0	0	0	0	3	5	4	4	2	2	2	1	0	3	3	1	1	2	2	0	0	0	0	0	0	1	4
Q9NZI8;F8W930;O00425;Q9Y6M1	Q9NZI8	3;1;1;1	3;1;1;1	3;1;1;1	Insulin-like growth factor 2 mRNA-binding protein 1	IGF2BP1	sp|Q9NZI8|IF2B1_HUMAN Insulin-like growth factor 2 mRNA-binding protein 1 OS=Homo sapiens OX=9606 GN=IGF2BP1 PE=1 SV=2	2	2	0	4	3	3	3	3	2	1	0	0	0	1	0	0	0	0	0	1	1	2	2	1	1	0	0	0	3	2	1	0	0	0	1	0	0	0	0	0	1	1
A0A087WT15;A0A096LP10	A0A087WT15;A0A096LP10	1;1	1;1	1;1		ALG13	tr|A0A087WT15|A0A087WT15_HUMAN N-acetylglucosaminyldiphosphodolichol N-acetylglucosaminyltransferase OS=Homo sapiens OX=9606 GN=ALG13 PE=1 SV=1;tr|A0A096LP10|A0A096LP10_HUMAN N-acetylglucosaminyldiphosphodolichol N-acetylglucosaminyltransferase (Fragment)	1	0	0	2	1	1	1	0	0	0	0	0	0	0	0	0	0	0	0	1	0	0	0	0	1	1	0	0	0	0	0	0	0	0	0	0	0	0	0	0	1	0
A0A087WWF8;F8VV13;Q96DR8	A0A087WWF8;F8VV13;Q96DR8	1;1;1	1;1;1	1;1;1	Mucin-like protein 1	MUCL1	tr|A0A087WWF8|A0A087WWF8_HUMAN Mucin-like protein 1 OS=Homo sapiens OX=9606 GN=MUCL1 PE=1 SV=1;tr|F8VV13|F8VV13_HUMAN Mucin-like protein 1 OS=Homo sapiens OX=9606 GN=MUCL1 PE=1 SV=1;sp|Q96DR8|MUCL1_HUMAN Mucin-like protein 1 OS=Homo sapiens OX=9606 GN=MUCL	1	0	0	3	1	1	1	0	0	0	0	0	0	0	0	0	0	1	0	0	0	1	0	0	0	0	0	0	0	0	0	0	0	0	0	0	0	0	1	0	0	0
A0A0C4DGP3;D3DX46;Q13368	A0A0C4DGP3;D3DX46;Q13368	1;1;1	1;1;1	1;1;1	MAGUK p55 subfamily member 3	MPP3	tr|A0A0C4DGP3|A0A0C4DGP3_HUMAN MAGUK p55 subfamily member 3 OS=Homo sapiens OX=9606 GN=MPP3 PE=1 SV=1;tr|D3DX46|D3DX46_HUMAN MAGUK p55 subfamily member 3 OS=Homo sapiens OX=9606 GN=MPP3 PE=1 SV=1;sp|Q13368|MPP3_HUMAN MAGUK p55 subfamily member 3 OS=Homo sa	1	0	0	3	1	1	1	0	1	0	0	0	0	0	0	0	0	0	0	1	0	0	1	0	0	0	1	0	0	1	0	0	0	0	0	0	0	0	0	0	1	0
A0A0U1RQQ4;Q9UNN8	A0A0U1RQQ4;Q9UNN8	2;2	2;2	2;2	Endothelial protein C receptor	PROCR	tr|A0A0U1RQQ4|A0A0U1RQQ4_HUMAN Endothelial protein C receptor (Fragment) OS=Homo sapiens OX=9606 GN=PROCR PE=1 SV=1;sp|Q9UNN8|EPCR_HUMAN Endothelial protein C receptor OS=Homo sapiens OX=9606 GN=PROCR PE=1 SV=1	1	0	0	2	2	2	2	1	0	0	0	0	0	0	0	0	0	0	0	1	1	1	1	0	1	1	2	0	1	0	0	0	0	0	0	0	0	0	0	0	1	1
A0A0U1RQT9;C9JYN0;Q16563	A0A0U1RQT9;C9JYN0;Q16563	1;1;1	1;1;1	1;1;1	Synaptophysin-like protein 1	SYPL1	tr|A0A0U1RQT9|A0A0U1RQT9_HUMAN Synaptophysin-like protein 1 (Fragment) OS=Homo sapiens OX=9606 GN=SYPL1 PE=1 SV=1;tr|C9JYN0|C9JYN0_HUMAN Synaptophysin-like protein 1 OS=Homo sapiens OX=9606 GN=SYPL1 PE=1 SV=1;sp|Q16563|SYPL1_HUMAN Synaptophysin-like protei	1	0	0	3	1	1	1	0	0	0	0	0	0	0	0	0	0	0	0	1	1	1	0	1	1	0	1	1	0	0	0	0	0	0	0	0	0	0	0	0	1	1
A0A140T955;A0A140T933;A0A1W2PPQ2;A0A1W2PRT9;Q53Z42;A0A140T9I0;A0A140T9X5;A0A140T913	A0A140T955;A0A140T933;A0A1W2PPQ2;A0A1W2PRT9;Q53Z42;A0A140T9I0;A0A140T9X5;A0A140T913	4;4;4;4;4;4;4;4	4;4;4;4;4;4;4;4	1;1;1;1;1;1;1;1		HLA-A	tr|A0A140T955|A0A140T955_HUMAN HLA class I histocompatibility antigen, A alpha chain OS=Homo sapiens OX=9606 GN=HLA-A PE=1 SV=1;tr|A0A140T933|A0A140T933_HUMAN HLA class I histocompatibility antigen, A alpha chain (Fragment) OS=Homo sapiens OX=9606 GN=HLA-A	1	5	0	8	4	4	1	3	3	1	2	2	1	2	0	0	0	0	0	1	1	2	1	2	2	0	2	0	3	3	1	2	2	1	2	0	0	0	0	0	1	1
A0A2U3TZL8;H7BYN4;Q02241	A0A2U3TZL8;H7BYN4;Q02241	1;1;1	1;1;1	1;1;1	Kinesin-like protein;Kinesin-like protein KIF23	KIF23	tr|A0A2U3TZL8|A0A2U3TZL8_HUMAN Kinesin-like protein OS=Homo sapiens OX=9606 GN=KIF23 PE=1 SV=1;tr|H7BYN4|H7BYN4_HUMAN Kinesin-like protein OS=Homo sapiens OX=9606 GN=KIF23 PE=1 SV=1;sp|Q02241|KIF23_HUMAN Kinesin-like protein KIF23 OS=Homo sapiens OX=9606 G	1	0	0	3	1	1	1	0	0	0	0	0	0	0	0	0	0	0	0	0	0	1	0	0	0	0	0	0	0	0	0	0	0	0	0	0	0	0	0	0	0	0
A0A494C017;C9JJV6;C9JZL8;A0A499FIY8;C9JC07;Q96S97	A0A494C017;C9JJV6;C9JZL8;A0A499FIY8;C9JC07;Q96S97	1;1;1;1;1;1	1;1;1;1;1;1	1;1;1;1;1;1	Myeloid-associated differentiation marker	MYADM	tr|A0A494C017|A0A494C017_HUMAN Myeloid-associated differentiation marker (Fragment) OS=Homo sapiens OX=9606 GN=MYADM PE=1 SV=1;tr|C9JJV6|C9JJV6_HUMAN Myeloid-associated differentiation marker (Fragment) OS=Homo sapiens OX=9606 GN=MYADM PE=1 SV=8;tr|C9JZL8|	1	0	0	6	1	1	1	0	0	0	0	0	0	0	0	0	0	0	0	1	1	1	1	1	1	1	1	0	0	0	0	0	0	0	0	0	0	0	0	0	1	1
A0A590UK44;A0A590UJW8;A0A590UJQ1;Q96J02;Q9H0M0;H0YBS9;H0YBA4;A0A590UK95;O00308	A0A590UK44;A0A590UJW8;A0A590UJQ1;Q96J02;Q9H0M0	3;3;3;3;2;1;1;1;1	3;3;3;3;2;1;1;1;1	3;3;3;3;2;1;1;1;1	E3 ubiquitin-protein ligase Itchy homolog;NEDD4-like E3 ubiquitin-protein ligase WWP1	ITCH;WWP1	tr|A0A590UK44|A0A590UK44_HUMAN E3 ubiquitin-protein ligase OS=Homo sapiens OX=9606 GN=ITCH PE=1 SV=1;tr|A0A590UJW8|A0A590UJW8_HUMAN E3 ubiquitin-protein ligase OS=Homo sapiens OX=9606 GN=ITCH PE=1 SV=1;tr|A0A590UJQ1|A0A590UJQ1_HUMAN E3 ubiquitin-protein li	1	0	0	9	3	3	3	0	0	0	0	0	0	0	0	0	0	0	0	0	1	2	0	0	2	0	0	0	0	0	0	0	0	0	0	0	0	0	0	0	0	1
A0A5F9W493;E7ETM0	A0A5F9W493;E7ETM0	10;8	1;1	0;0		CSNK1A1	tr|A0A5F9W493|A0A5F9W493_HUMAN Casein kinase 1, alpha 1, isoform CRA_d OS=Homo sapiens OX=9606 GN=CSNK1A1 PE=1 SV=1;tr|E7ETM0|E7ETM0_HUMAN Casein kinase I isoform alpha OS=Homo sapiens OX=9606 GN=CSNK1A1 PE=1 SV=1	1	0	0	2	10	1	0	1	1	0	0	1	0	0	0	0	0	0	0	8	8	9	5	5	3	5	2	1	0	0	0	0	0	0	0	0	0	0	0	0	1	1
A0A5H1ZRQ3;P01834	A0A5H1ZRQ3;P01834	1;1	1;1	1;1	Ig kappa chain C region	IGKC	tr|A0A5H1ZRQ3|A0A5H1ZRQ3_HUMAN Immunoglobulin kappa constant (Fragment) OS=Homo sapiens OX=9606 GN=IGKC PE=1 SV=1;sp|P01834|IGKC_HUMAN Immunoglobulin kappa constant OS=Homo sapiens OX=9606 GN=IGKC PE=1 SV=2	1	0	0	2	1	1	1	0	0	0	0	0	0	0	0	0	0	0	0	0	0	0	1	0	0	0	0	0	0	0	0	0	0	0	0	0	0	0	0	0	0	0
A8MUA9;A8MU27;Q6EEV6;P61956;P55854	A8MUA9;A8MU27;Q6EEV6;P61956;P55854	1;1;1;1;1	1;1;1;1;1	1;1;1;1;1	Small ubiquitin-related modifier 4;Small ubiquitin-related modifier 2;Small ubiquitin-related modifier 3	SUMO3;SUMO4;SUMO2	tr|A8MUA9|A8MUA9_HUMAN SMT3 suppressor of mif two 3 homolog 3 (Yeast), isoform CRA_d OS=Homo sapiens OX=9606 GN=SUMO3 PE=1 SV=1;tr|A8MU27|A8MU27_HUMAN Small ubiquitin-related modifier 3 OS=Homo sapiens OX=9606 GN=SUMO3 PE=1 SV=1;sp|Q6EEV6|SUMO4_HUMAN Small	1	0	0	5	1	1	1	0	0	0	1	0	0	0	0	0	0	0	0	1	1	1	1	1	1	0	1	0	0	0	0	1	0	0	0	0	0	0	0	0	1	1
B1AK85;P47756;A0A6I8PRV6;A0A6I8PIN8;B1AK87;B1AK88	B1AK85;P47756;A0A6I8PRV6;A0A6I8PIN8;B1AK87;B1AK88	2;2;1;1;1;1	2;2;1;1;1;1	2;2;1;1;1;1	F-actin-capping protein subunit beta	CAPZB	tr|B1AK85|B1AK85_HUMAN F-actin-capping protein subunit beta OS=Homo sapiens OX=9606 GN=CAPZB PE=1 SV=1;sp|P47756|CAPZB_HUMAN F-actin-capping protein subunit beta OS=Homo sapiens OX=9606 GN=CAPZB PE=1 SV=4;tr|A0A6I8PRV6|A0A6I8PRV6_HUMAN F-actin-capping prot	1	0	0	6	2	2	2	1	0	0	0	1	0	0	0	0	0	0	0	0	2	0	1	1	0	1	0	0	1	0	0	0	1	0	0	0	0	0	0	0	0	2
B7Z248;B7Z613;Q13491	B7Z248;B7Z613;Q13491	1;1;1	1;1;1	1;1;1	Neuronal membrane glycoprotein M6-b	GPM6B	tr|B7Z248|B7Z248_HUMAN Neuronal membrane glycoprotein M6-b OS=Homo sapiens OX=9606 GN=GPM6B PE=1 SV=1;tr|B7Z613|B7Z613_HUMAN Neuronal membrane glycoprotein M6-b OS=Homo sapiens OX=9606 GN=GPM6B PE=1 SV=1;sp|Q13491|GPM6B_HUMAN Neuronal membrane glycoprotein	1	0	0	3	1	1	1	0	0	0	0	0	0	0	0	0	0	0	0	1	0	1	0	0	0	0	0	1	0	0	0	0	0	0	0	0	0	0	0	0	1	0
B7ZKQ9;Q8WTV0;F5H4X0;F5H5E8	B7ZKQ9;Q8WTV0;F5H4X0	4;3;2;1	4;3;2;1	4;3;2;1	Scavenger receptor class B member 1	SCARB1	tr|B7ZKQ9|B7ZKQ9_HUMAN SCARB1 protein OS=Homo sapiens OX=9606 GN=SCARB1 PE=1 SV=1;sp|Q8WTV0|SCRB1_HUMAN Scavenger receptor class B member 1 OS=Homo sapiens OX=9606 GN=SCARB1 PE=1 SV=1;tr|F5H4X0|F5H4X0_HUMAN Scavenger receptor class B member 1 OS=Homo sapie	1	0	0	4	4	4	4	0	1	0	0	0	0	1	0	0	0	0	0	0	1	0	0	0	0	1	1	0	0	1	0	0	0	0	1	0	0	0	0	0	0	1
C9J0E4;P01040	C9J0E4;P01040	1;1	1;1	1;1	Cystatin-A;Cystatin-A, N-terminally processed	CSTA	tr|C9J0E4|C9J0E4_HUMAN Cystatin-A OS=Homo sapiens OX=9606 GN=CSTA PE=1 SV=1;sp|P01040|CYTA_HUMAN Cystatin-A OS=Homo sapiens OX=9606 GN=CSTA PE=1 SV=1	1	0	0	2	1	1	1	0	0	0	0	0	0	0	0	0	0	0	1	0	1	0	0	0	0	0	0	0	0	0	0	0	0	0	0	0	0	0	0	1	0	1
C9J6P4;Q7Z2W4;H7C5K1	C9J6P4;Q7Z2W4;H7C5K1	2;2;1	2;2;1	2;2;1	Zinc finger CCCH-type antiviral protein 1	ZC3HAV1	tr|C9J6P4|C9J6P4_HUMAN Zinc finger CCCH-type antiviral protein 1 OS=Homo sapiens OX=9606 GN=ZC3HAV1 PE=1 SV=1;sp|Q7Z2W4|ZCCHV_HUMAN Zinc finger CCCH-type antiviral protein 1 OS=Homo sapiens OX=9606 GN=ZC3HAV1 PE=1 SV=3;tr|H7C5K1|H7C5K1_HUMAN Zinc finger CC	1	0	0	3	2	2	2	0	1	0	0	0	0	0	0	0	0	0	0	0	1	1	0	0	0	0	0	0	0	1	0	0	0	0	0	0	0	0	0	0	0	1
C9JB90;C9JU14;J3KR73;Q9NRW1;P20340;Q14964	C9JB90;C9JU14;J3KR73;Q9NRW1;P20340;Q14964	1;1;1;1;1;1	1;1;1;1;1;1	1;1;1;1;1;1	Ras-related protein Rab-6B;Ras-related protein Rab-6A;Ras-related protein Rab-39A	RAB6B;RAB6A;RAB39A	tr|C9JB90|C9JB90_HUMAN Ras-related protein Rab-6B (Fragment) OS=Homo sapiens OX=9606 GN=RAB6B PE=4 SV=1;tr|C9JU14|C9JU14_HUMAN Ras-related protein Rab-6B (Fragment) OS=Homo sapiens OX=9606 GN=RAB6B PE=1 SV=3;tr|J3KR73|J3KR73_HUMAN Ras-related protein Rab-6	1	0	0	6	1	1	1	1	0	0	0	1	0	0	0	0	0	0	1	1	1	1	1	1	1	1	1	0	1	0	0	0	1	0	0	0	0	0	0	1	1	1
C9JEV0;P25311	C9JEV0;P25311	3;3	3;3	3;3	Zinc-alpha-2-glycoprotein	AZGP1	tr|C9JEV0|C9JEV0_HUMAN Zinc-alpha-2-glycoprotein OS=Homo sapiens OX=9606 GN=AZGP1 PE=1 SV=1;sp|P25311|ZA2G_HUMAN Zinc-alpha-2-glycoprotein OS=Homo sapiens OX=9606 GN=AZGP1 PE=1 SV=2	1	0	0	2	3	3	3	0	0	0	0	0	0	0	0	0	0	0	1	2	1	0	0	1	1	0	0	0	0	0	0	0	0	0	0	0	0	0	0	1	2	1
E5RIU6;A0A087WZZ9;A0A024QZP7;P06493;F8VXD2;A0A2R8YEB7;K7ELV5;F8VYH9;F8VZZ0;F8VTV8;F8VWX7;F8VZ51;K7EJ83;E7ESI2;A0A2R8Y644;H0YAZ9;Q9BVE2;E7EUK8;G3V5T9;E5RGN0;A0A087X209;A0A087WZU2;A0A2R8YD28;F5H6Z0;A0A2R8YF61;A0A2R8Y7W5;J3QSD7;A0A2R8Y4Z0;Q00535;P24941;P11802;Q00526;Q00534;P50750;Q96Q40;O94921;Q07002;Q00536;Q00537;Q9NYV4;Q14004	E5RIU6;A0A087WZZ9;A0A024QZP7;P06493;F8VXD2;A0A2R8YEB7;K7ELV5;F8VYH9;F8VZZ0;F8VTV8;F8VWX7;F8VZ51;K7EJ83;E7ESI2;A0A2R8Y644;H0YAZ9;Q9BVE2;E7EUK8;G3V5T9;E5RGN0;A0A087X209;A0A087WZU2;A0A2R8YD28;F5H6Z0;A0A2R8YF61;A0A2R8Y7W5;J3QSD7;A0A2R8Y4Z0;Q00535;P24941;P11802;Q00526;Q00534;P50750;Q96Q40;O94921;Q07002;Q00536;Q00537;Q9NYV4;Q14004	2;2;2;2;1;1;1;1;1;1;1;1;1;1;1;1;1;1;1;1;1;1;1;1;1;1;1;1;1;1;1;1;1;1;1;1;1;1;1;1;1	2;2;2;2;1;1;1;1;1;1;1;1;1;1;1;1;1;1;1;1;1;1;1;1;1;1;1;1;1;1;1;1;1;1;1;1;1;1;1;1;1	2;2;2;2;1;1;1;1;1;1;1;1;1;1;1;1;1;1;1;1;1;1;1;1;1;1;1;1;1;1;1;1;1;1;1;1;1;1;1;1;1	Cyclin-dependent kinase 1;Cyclin-dependent-like kinase 5;Cyclin-dependent kinase 2;Cyclin-dependent kinase 4;Cyclin-dependent kinase 3;Cyclin-dependent kinase 6;Cyclin-dependent kinase 9;Cyclin-dependent kinase 15;Cyclin-dependent kinase 14;Cyclin-dependent kinase 18;Cyclin-dependent kinase 16;Cyclin-dependent kinase 17;Cyclin-dependent kinase 12;Cyclin-dependent kinase 13	CDK1;CDC2;CDK4;CDK3;CDK2;CDK16;CDK13;CDK14;CDK17;CDK12;CDK5;CDK6;CDK9;CDK15;CDK18	tr|E5RIU6|E5RIU6_HUMAN Cyclin-dependent kinase 1 (Fragment) OS=Homo sapiens OX=9606 GN=CDK1 PE=1 SV=2;tr|A0A087WZZ9|A0A087WZZ9_HUMAN Cyclin-dependent kinase 1 OS=Homo sapiens OX=9606 GN=CDK1 PE=1 SV=1;tr|A0A024QZP7|A0A024QZP7_HUMAN Cell division cycle 2, G	1	0	0	41	2	2	2	0	1	0	1	1	0	1	0	0	0	0	0	1	1	0	0	0	1	0	0	0	0	1	0	1	1	0	1	0	0	0	0	0	1	1
E5RJ10;E5RHB8;E5RJX6;E5RG91;Q8NEZ2	E5RJ10;E5RHB8;E5RJX6;E5RG91;Q8NEZ2	1;1;1;1;1	1;1;1;1;1	1;1;1;1;1	Vacuolar protein sorting-associated protein 37A	VPS37A	tr|E5RJ10|E5RJ10_HUMAN Vacuolar protein sorting-associated protein 37A OS=Homo sapiens OX=9606 GN=VPS37A PE=1 SV=1;tr|E5RHB8|E5RHB8_HUMAN Vacuolar protein sorting-associated protein 37A OS=Homo sapiens OX=9606 GN=VPS37A PE=1 SV=1;tr|E5RJX6|E5RJX6_HUMAN Vac	1	0	0	5	1	1	1	0	0	0	0	0	0	0	0	0	0	0	0	0	0	1	0	0	0	0	0	0	0	0	0	0	0	0	0	0	0	0	0	0	0	0
E9PEZ5;A0A1B0GUL6;Q9UPP5	E9PEZ5;A0A1B0GUL6;Q9UPP5	2;2;1	2;2;1	2;2;1	Uncharacterized protein KIAA1107	KIAA1107	tr|E9PEZ5|E9PEZ5_HUMAN BTB/POZ domain-containing protein 8 OS=Homo sapiens OX=9606 GN=BTBD8 PE=1 SV=2;tr|A0A1B0GUL6|A0A1B0GUL6_HUMAN BTB/POZ domain-containing protein 8 OS=Homo sapiens OX=9606 GN=BTBD8 PE=1 SV=1;sp|Q9UPP5|K1107_HUMAN AP2-interacting clathr	1	0	0	3	2	2	2	0	0	0	0	0	0	0	0	0	0	0	0	0	0	1	0	0	0	1	0	0	0	0	0	0	0	0	0	0	0	0	0	0	0	0
E9PRJ3;K4DIA7;E9PMR4;P48509	E9PRJ3;K4DIA7;E9PMR4;P48509	1;1;1;1	1;1;1;1	1;1;1;1	Tetraspanin;CD151 antigen	CD151	tr|E9PRJ3|E9PRJ3_HUMAN Tetraspanin (Fragment) OS=Homo sapiens OX=9606 GN=CD151 PE=1 SV=1;tr|K4DIA7|K4DIA7_HUMAN Tetraspanin (Fragment) OS=Homo sapiens OX=9606 GN=CD151 PE=1 SV=1;tr|E9PMR4|E9PMR4_HUMAN Tetraspanin OS=Homo sapiens OX=9606 GN=CD151 PE=1 SV=1;	1	0	0	4	1	1	1	0	0	0	0	0	0	0	0	0	0	0	0	1	1	1	0	0	0	0	1	0	0	0	0	0	0	0	0	0	0	0	0	0	1	1
F5GZ56;Q9UG01	F5GZ56;Q9UG01	1;1	1;1	1;1	Intraflagellar transport protein 172 homolog	IFT172	tr|F5GZ56|F5GZ56_HUMAN Intraflagellar transport protein 172 homolog OS=Homo sapiens OX=9606 GN=IFT172 PE=1 SV=1;sp|Q9UG01|IF172_HUMAN Intraflagellar transport protein 172 homolog OS=Homo sapiens OX=9606 GN=IFT172 PE=1 SV=2	1	0	0	2	1	1	1	0	1	0	0	1	1	0	0	0	0	0	0	0	0	0	0	0	0	0	1	0	0	1	0	0	1	1	0	0	0	0	0	0	0	0
F5H157;Q15286	F5H157;Q15286	3;3	3;3	3;3	Ras-related protein Rab-35	RAB35	tr|F5H157|F5H157_HUMAN Ras-related protein Rab-35 (Fragment) OS=Homo sapiens OX=9606 GN=RAB35 PE=1 SV=1;sp|Q15286|RAB35_HUMAN Ras-related protein Rab-35 OS=Homo sapiens OX=9606 GN=RAB35 PE=1 SV=1	1	0	0	2	3	3	3	1	0	1	0	0	0	1	0	0	0	0	0	1	1	2	1	1	1	1	1	0	1	0	1	0	0	0	1	0	0	0	0	0	1	1
F6RFD5;P60981	F6RFD5;P60981	2;2	2;2	2;2	Destrin	DSTN	tr|F6RFD5|F6RFD5_HUMAN Actin-depolymerizing factor OS=Homo sapiens OX=9606 GN=DSTN PE=1 SV=1;sp|P60981|DEST_HUMAN Destrin OS=Homo sapiens OX=9606 GN=DSTN PE=1 SV=3	1	0	0	2	2	2	2	0	0	0	1	0	0	0	0	0	0	0	0	0	0	2	0	1	0	0	0	0	0	0	0	1	0	0	0	0	0	0	0	0	0	0
F6U4U2;P51955	F6U4U2;P51955	2;2	2;2	2;2	Serine/threonine-protein kinase Nek2	NEK2	tr|F6U4U2|F6U4U2_HUMAN Serine/threonine-protein kinase Nek2 OS=Homo sapiens OX=9606 GN=NEK2 PE=1 SV=1;sp|P51955|NEK2_HUMAN Serine/threonine-protein kinase Nek2 OS=Homo sapiens OX=9606 GN=NEK2 PE=1 SV=1	1	0	0	2	2	2	2	0	0	0	0	0	0	0	0	0	0	0	0	0	1	0	0	0	0	1	0	0	0	0	0	0	0	0	0	0	0	0	0	0	0	1
F8VWW8;Q92485;Q5T0Y8	F8VWW8;Q92485;Q5T0Y8	2;2;1	2;2;1	2;2;1	Acid sphingomyelinase-like phosphodiesterase 3b	SMPDL3B	tr|F8VWW8|F8VWW8_HUMAN Acid sphingomyelinase-like phosphodiesterase 3b OS=Homo sapiens OX=9606 GN=SMPDL3B PE=1 SV=1;sp|Q92485|ASM3B_HUMAN Acid sphingomyelinase-like phosphodiesterase 3b OS=Homo sapiens OX=9606 GN=SMPDL3B PE=1 SV=2;tr|Q5T0Y8|Q5T0Y8_HUMAN Ac	1	0	0	3	2	2	2	0	0	0	0	0	0	0	0	0	0	0	0	0	1	2	0	0	0	0	0	0	0	0	0	0	0	0	0	0	0	0	0	0	0	1
F8WE04;P04792	F8WE04;P04792	2;2	2;2	2;2	Heat shock protein beta-1	HSPB1	tr|F8WE04|F8WE04_HUMAN Heat shock protein beta-1 OS=Homo sapiens OX=9606 GN=HSPB1 PE=1 SV=1;sp|P04792|HSPB1_HUMAN Heat shock protein beta-1 OS=Homo sapiens OX=9606 GN=HSPB1 PE=1 SV=2	1	0	0	2	2	2	2	1	0	0	0	0	0	0	0	0	0	0	0	0	0	1	2	0	1	0	0	0	1	0	0	0	0	0	0	0	0	0	0	0	0	0
G5EA09	G5EA09	14	1	1		SDCBP	tr|G5EA09|G5EA09_HUMAN Syndecan binding protein (Syntenin), isoform CRA_a OS=Homo sapiens OX=9606 GN=SDCBP PE=1 SV=1	1	0	0	1	14	1	1	5	6	2	3	2	1	3	1	0	2	1	3	6	6	7	4	5	4	5	5	5	0	0	0	0	0	0	0	0	0	0	0	1	0	0
H0Y579;P54727	H0Y579;P54727	1;1	1;1	1;1	UV excision repair protein RAD23 homolog B	RAD23B	tr|H0Y579|H0Y579_HUMAN UV excision repair protein RAD23 homolog B (Fragment) OS=Homo sapiens OX=9606 GN=RAD23B PE=1 SV=1;sp|P54727|RD23B_HUMAN UV excision repair protein RAD23 homolog B OS=Homo sapiens OX=9606 GN=RAD23B PE=1 SV=1	1	0	0	2	1	1	1	0	0	0	0	0	0	0	0	0	0	0	0	0	1	1	1	0	0	0	0	0	0	0	0	0	0	0	0	0	0	0	0	0	0	1
H0YKJ9;O60637;H0YMH8	H0YKJ9;O60637;H0YMH8	2;2;1	2;2;1	2;2;1	Tetraspanin-3	TSPAN3	tr|H0YKJ9|H0YKJ9_HUMAN Tetraspanin-3 OS=Homo sapiens OX=9606 GN=TSPAN3 PE=1 SV=1;sp|O60637|TSN3_HUMAN Tetraspanin-3 OS=Homo sapiens OX=9606 GN=TSPAN3 PE=2 SV=1;tr|H0YMH8|H0YMH8_HUMAN Tetraspanin-3 OS=Homo sapiens OX=9606 GN=TSPAN3 PE=1 SV=1	1	0	0	3	2	2	2	0	1	0	1	0	0	0	1	0	0	0	0	0	1	0	0	0	0	0	0	0	0	1	0	1	0	0	0	1	0	0	0	0	0	1
H0YNE9;Q92930;H0YMN7;M0R257;P20337;O95716;P20336;Q96E17	H0YNE9;Q92930;H0YMN7	3;3;2;1;1;1;1;1	1;1;0;0;0;0;0;0	1;1;0;0;0;0;0;0	Ras-related protein Rab-8B	RAB8B	tr|H0YNE9|H0YNE9_HUMAN Ras-related protein Rab-8B (Fragment) OS=Homo sapiens OX=9606 GN=RAB8B PE=1 SV=1;sp|Q92930|RAB8B_HUMAN Ras-related protein Rab-8B OS=Homo sapiens OX=9606 GN=RAB8B PE=1 SV=2;tr|H0YMN7|H0YMN7_HUMAN Ras-related protein Rab-8B OS=Homo sa	1	0	0	8	3	1	1	1	1	0	1	1	0	1	0	0	1	0	1	1	3	1	1	1	1	1	1	1	0	0	0	0	0	0	0	0	0	0	0	0	0	1
H3BPR3;Q8WV41	H3BPR3;Q8WV41	1;1	1;1	1;1	Sorting nexin-33	SNX33	tr|H3BPR3|H3BPR3_HUMAN Sorting nexin-33 (Fragment) OS=Homo sapiens OX=9606 GN=SNX33 PE=1 SV=1;sp|Q8WV41|SNX33_HUMAN Sorting nexin-33 OS=Homo sapiens OX=9606 GN=SNX33 PE=1 SV=1	1	0	0	2	1	1	1	0	0	0	0	0	0	0	0	0	0	0	0	1	0	0	0	0	0	0	0	0	0	0	0	0	0	0	0	0	0	0	0	0	1	0
H3BSW0;A0A3B3ISV5;Q8N9N7	H3BSW0;A0A3B3ISV5;Q8N9N7	3;3;3	3;3;3	3;3;3	Leucine-rich repeat-containing protein 57	LRRC57	tr|H3BSW0|H3BSW0_HUMAN Leucine-rich repeat-containing protein 57 (Fragment) OS=Homo sapiens OX=9606 GN=LRRC57 PE=1 SV=1;tr|A0A3B3ISV5|A0A3B3ISV5_HUMAN Uncharacterized protein OS=Homo sapiens OX=9606 PE=4 SV=1;sp|Q8N9N7|LRC57_HUMAN Leucine-rich repeat-conta	1	0	0	3	3	3	3	0	1	0	0	0	0	0	0	0	0	0	0	1	1	0	1	1	0	0	1	0	0	1	0	0	0	0	0	0	0	0	0	0	1	1
H3BTL1;Q9GZQ8;A6NCE7;Q9H492	H3BTL1;Q9GZQ8;A6NCE7;Q9H492	2;2;2;1	2;2;2;1	2;2;2;1	Microtubule-associated proteins 1A/1B light chain 3B;Microtubule-associated proteins 1A/1B light chain 3 beta 2;Microtubule-associated proteins 1A/1B light chain 3A	MAP1LC3B;MAP1LC3B2;MAP1LC3A	tr|H3BTL1|H3BTL1_HUMAN Microtubule-associated protein 1 light chain 3 beta, isoform CRA_f OS=Homo sapiens OX=9606 GN=MAP1LC3B PE=3 SV=1;sp|Q9GZQ8|MLP3B_HUMAN Microtubule-associated proteins 1A/1B light chain 3B OS=Homo sapiens OX=9606 GN=MAP1LC3B PE=1 SV=3	1	0	0	4	2	2	2	0	0	0	0	0	0	0	0	0	0	0	0	0	1	0	0	2	1	1	0	1	0	0	0	0	0	0	0	0	0	0	0	0	0	1
H7BXY6;A6NEP9;Q8NG11	H7BXY6;A6NEP9;Q8NG11	1;1;1	1;1;1	1;1;1	Tetraspanin;Tetraspanin-14	TSPAN14	tr|H7BXY6|H7BXY6_HUMAN Tetraspanin OS=Homo sapiens OX=9606 GN=TSPAN14 PE=1 SV=1;tr|A6NEP9|A6NEP9_HUMAN Tetraspanin (Fragment) OS=Homo sapiens OX=9606 GN=TSPAN14 PE=1 SV=2;sp|Q8NG11|TSN14_HUMAN Tetraspanin-14 OS=Homo sapiens OX=9606 GN=TSPAN14 PE=1 SV=1	1	0	0	3	1	1	1	1	1	0	0	0	0	0	0	0	0	0	0	1	1	1	1	1	0	1	0	0	1	1	0	0	0	0	0	0	0	0	0	0	1	1
H7C0V0;Q8WWC4	H7C0V0;Q8WWC4	1;1	1;1	1;1	Uncharacterized protein C2orf47, mitochondrial	C2orf47	tr|H7C0V0|H7C0V0_HUMAN m-AAA protease-interacting protein 1, mitochondrial (Fragment) OS=Homo sapiens OX=9606 GN=MAIP1 PE=1 SV=1;sp|Q8WWC4|MAIP1_HUMAN m-AAA protease-interacting protein 1, mitochondrial OS=Homo sapiens OX=9606 GN=MAIP1 PE=1 SV=1	1	0	0	2	1	1	1	0	1	0	0	0	0	0	0	0	0	0	0	0	1	0	0	0	0	0	1	0	0	1	0	0	0	0	0	0	0	0	0	0	0	1
H7C543;F5GXJ9;Q13740	H7C543;F5GXJ9;Q13740	1;1;1	1;1;1	1;1;1	CD166 antigen	ALCAM	tr|H7C543|H7C543_HUMAN Activated leukocyte cell adhesion molecule (Fragment) OS=Homo sapiens OX=9606 GN=ALCAM PE=1 SV=1;tr|F5GXJ9|F5GXJ9_HUMAN Activated leukocyte cell adhesion molecule OS=Homo sapiens OX=9606 GN=ALCAM PE=1 SV=1;sp|Q13740|CD166_HUMAN CD166	1	0	0	3	1	1	1	0	0	0	0	0	0	0	0	0	0	0	0	0	1	1	0	1	0	0	0	0	0	0	0	0	0	0	0	0	0	0	0	0	0	1
J3KR66;Q96L35;B1AKC9;E9PG71;A0A3B3IRY8;A0A0B4J1T8;P29317;P54762;P54764;P54760;Q15375;P54753;Q9UF33;P29323	J3KR66;Q96L35;B1AKC9;E9PG71;A0A3B3IRY8;A0A0B4J1T8;P29317;P54762;P54764;P54760;Q15375;P54753;Q9UF33;P29323	1;1;1;1;1;1;1;1;1;1;1;1;1;1	1;1;1;1;1;1;1;1;1;1;1;1;1;1	1;1;1;1;1;1;1;1;1;1;1;1;1;1	Receptor protein-tyrosine kinase;Ephrin type-A receptor 2;Ephrin type-B receptor 1;Ephrin type-A receptor 4;Ephrin type-B receptor 4;Ephrin type-A receptor 7;Ephrin type-B receptor 3;Ephrin type-A receptor 6;Ephrin type-B receptor 2	EPHA6;EPHB4;EPHB2;EPHA4;EPHA2;EPHB1;EPHA7;EPHB3	tr|J3KR66|J3KR66_HUMAN Ephrin type-A receptor 6 OS=Homo sapiens OX=9606 GN=EPHA6 PE=1 SV=1;tr|Q96L35|Q96L35_HUMAN Receptor protein-tyrosine kinase OS=Homo sapiens OX=9606 GN=EPHB4 PE=1 SV=1;tr|B1AKC9|B1AKC9_HUMAN Receptor protein-tyrosine kinase OS=Homo sa	1	0	0	14	1	1	1	1	0	0	0	0	0	0	0	0	0	0	0	1	1	0	0	1	0	0	0	0	1	0	0	0	0	0	0	0	0	0	0	0	1	1
J3KRE2;J3KTF8;J3QQX2;P52565;J3KS60;J3KRY1	J3KRE2;J3KTF8;J3QQX2;P52565;J3KS60;J3KRY1	2;2;2;2;1;1	2;2;2;2;1;1	2;2;2;2;1;1	Rho GDP-dissociation inhibitor 1	ARHGDIA	tr|J3KRE2|J3KRE2_HUMAN Rho GDP-dissociation inhibitor 1 OS=Homo sapiens OX=9606 GN=ARHGDIA PE=1 SV=1;tr|J3KTF8|J3KTF8_HUMAN Rho GDP-dissociation inhibitor 1 (Fragment) OS=Homo sapiens OX=9606 GN=ARHGDIA PE=1 SV=8;tr|J3QQX2|J3QQX2_HUMAN Rho GDP-dissociation	1	0	0	6	2	2	2	1	0	0	1	1	0	0	0	0	0	0	1	0	0	1	1	0	0	0	0	0	1	0	0	1	1	0	0	0	0	0	0	1	0	0
J3QRU1;P12931;P06241;P07947;Q573B4;P06239	J3QRU1;P12931;P06241;P07947;Q573B4;P06239	2;2;2;2;1;1	2;2;2;2;1;1	2;2;2;2;1;1	Non-specific protein-tyrosine kinase;Proto-oncogene tyrosine-protein kinase Src;Tyrosine-protein kinase Fyn;Tyrosine-protein kinase Yes;Tyrosine-protein kinase Lck	YES1;SRC;FYN;LCK	tr|J3QRU1|J3QRU1_HUMAN Tyrosine-protein kinase OS=Homo sapiens OX=9606 GN=YES1 PE=1 SV=1;sp|P12931|SRC_HUMAN Proto-oncogene tyrosine-protein kinase Src OS=Homo sapiens OX=9606 GN=SRC PE=1 SV=3;sp|P06241|FYN_HUMAN Tyrosine-protein kinase Fyn OS=Homo sapiens	1	0	0	6	2	2	2	0	1	1	1	0	1	1	0	0	0	0	0	0	1	1	0	0	0	0	1	0	0	1	1	1	0	1	1	0	0	0	0	0	0	1
K7EMP1	K7EMP1	13	1	1		CC2D1A	tr|K7EMP1|K7EMP1_HUMAN Coiled-coil and C2 domain-containing protein 1A (Fragment) OS=Homo sapiens OX=9606 GN=CC2D1A PE=1 SV=1	1	0	0	1	13	1	1	4	3	3	3	1	0	1	0	0	0	0	0	3	3	6	4	3	3	4	4	1	1	0	0	0	0	0	0	0	0	0	0	0	0	0
K7EMV3;A0A590UJJ6;B4DEB1;K7EK07;K7ES00;Q71DI3;Q16695;P84243;P68431;K7EP01;Q6NXT2	K7EMV3;A0A590UJJ6;B4DEB1;K7EK07;K7ES00;Q71DI3;Q16695;P84243;P68431;K7EP01;Q6NXT2	3;3;3;3;3;3;3;3;3;2;2	3;3;3;3;3;3;3;3;3;2;2	1;1;1;1;1;1;1;1;1;0;0	Histone H3;Histone H3.2;Histone H3.1t;Histone H3.3;Histone H3.1;Histone H3.3C	H3F3B;H3F3A;HIST2H3A;HIST3H3;HIST1H3A;H3F3C	tr|K7EMV3|K7EMV3_HUMAN Histone H3 OS=Homo sapiens OX=9606 GN=H3-3B PE=1 SV=1;tr|A0A590UJJ6|A0A590UJJ6_HUMAN Histone H3 OS=Homo sapiens OX=9606 GN=H3-3A PE=1 SV=1;tr|B4DEB1|B4DEB1_HUMAN Histone H3 OS=Homo sapiens OX=9606 GN=H3-3A PE=1 SV=1;tr|K7EK07|K7EK07_	1	3	3	11	3	3	1	1	2	1	2	2	1	1	1	0	3	2	3	0	0	0	1	0	0	1	2	1	1	2	1	2	2	1	1	1	0	3	2	3	0	0
K7ENK9;K7EKX0;J3QRU4;F8WCA0;L7N2F9;Q15836;P63027	K7ENK9;K7EKX0;J3QRU4;F8WCA0;L7N2F9;Q15836;P63027	1;1;1;1;1;1;1	1;1;1;1;1;1;1	1;1;1;1;1;1;1	Vesicle-associated membrane protein 3;Vesicle-associated membrane protein 2	VAMP2;VAMP3	tr|K7ENK9|K7ENK9_HUMAN Vesicle-associated membrane protein 2 OS=Homo sapiens OX=9606 GN=VAMP2 PE=3 SV=1;tr|K7EKX0|K7EKX0_HUMAN Vesicle-associated membrane protein 3 OS=Homo sapiens OX=9606 GN=VAMP3 PE=3 SV=1;tr|J3QRU4|J3QRU4_HUMAN Synaptobrevin-2 OS=Homo s	1	0	0	7	1	1	1	0	0	0	0	0	0	0	0	0	0	0	0	0	0	0	0	1	1	0	0	0	0	0	0	0	0	0	0	0	0	0	0	0	0	0
M0QY01	M0QY01	1	1	1		EPS15L1	tr|M0QY01|M0QY01_HUMAN Epidermal growth factor receptor substrate 15-like 1 (Fragment) OS=Homo sapiens OX=9606 GN=EPS15L1 PE=1 SV=1	1	0	0	1	1	1	1	1	0	1	1	0	0	0	0	0	0	0	0	1	0	0	0	0	0	0	0	0	1	0	1	1	0	0	0	0	0	0	0	0	1	0
O00186	O00186	1	1	1	Syntaxin-binding protein 3	STXBP3	sp|O00186|STXB3_HUMAN Syntaxin-binding protein 3 OS=Homo sapiens OX=9606 GN=STXBP3 PE=1 SV=2	1	0	0	1	1	1	1	0	0	0	1	0	0	0	0	0	0	0	0	0	1	0	0	0	0	0	0	0	0	0	0	1	0	0	0	0	0	0	0	0	0	1
O60673	O60673	1	1	1	DNA polymerase zeta catalytic subunit	REV3L	sp|O60673|REV3L_HUMAN DNA polymerase zeta catalytic subunit OS=Homo sapiens OX=9606 GN=REV3L PE=1 SV=2	1	0	0	1	1	1	1	0	0	0	0	0	0	0	0	0	0	0	0	0	0	1	0	0	0	0	0	0	0	0	0	0	0	0	0	0	0	0	0	0	0	0
O75054	O75054	3	3	3	Immunoglobulin superfamily member 3	IGSF3	sp|O75054|IGSF3_HUMAN Immunoglobulin superfamily member 3 OS=Homo sapiens OX=9606 GN=IGSF3 PE=2 SV=3	1	0	0	1	3	3	3	0	0	0	0	0	0	0	0	0	0	0	0	1	2	2	1	0	0	1	0	0	0	0	0	0	0	0	0	0	0	0	0	0	1	2
O95297;Q9UEL6	O95297	3;1	3;1	3;1	Myelin protein zero-like protein 1	MPZL1	sp|O95297|MPZL1_HUMAN Myelin protein zero-like protein 1 OS=Homo sapiens OX=9606 GN=MPZL1 PE=1 SV=1	1	0	0	2	3	3	3	0	1	0	1	0	0	0	0	0	0	0	0	1	1	2	1	0	0	1	1	0	0	1	0	1	0	0	0	0	0	0	0	0	1	1
P00558;P07205	P00558	3;1	3;1	3;1	Phosphoglycerate kinase 1	PGK1	sp|P00558|PGK1_HUMAN Phosphoglycerate kinase 1 OS=Homo sapiens OX=9606 GN=PGK1 PE=1 SV=3	1	0	0	2	3	3	3	1	0	0	0	0	0	0	0	0	0	0	0	0	1	0	1	0	0	0	0	0	1	0	0	0	0	0	0	0	0	0	0	0	0	1
P01024	P01024	6	1	1	Complement C3;Complement C3 beta chain;C3-beta-c;Complement C3 alpha chain;C3a anaphylatoxin;Acylation stimulating protein;Complement C3b alpha chain;Complement C3c alpha chain fragment 1;Complement C3dg fragment;Complement C3g fragment;Complement C3d fragment;Complement C3f fragment;Complement C3c alpha chain fragment 2	C3	sp|P01024|CO3_HUMAN Complement C3 OS=Homo sapiens OX=9606 GN=C3 PE=1 SV=2	1	0	0	1	6	1	1	2	0	0	3	0	0	2	0	0	0	0	4	0	1	3	2	1	0	1	2	0	1	0	0	0	0	0	0	0	0	0	0	0	0	0
P01112	P01112	4	1	0	GTPase HRas;GTPase HRas, N-terminally processed	HRAS	sp|P01112|RASH_HUMAN GTPase HRas OS=Homo sapiens OX=9606 GN=HRAS PE=1 SV=1	1	0	0	1	4	1	0	2	2	1	0	2	1	0	0	0	0	0	0	3	3	1	1	1	2	2	3	1	0	1	0	0	1	0	0	0	0	0	0	0	1	1
P04040	P04040	2	2	2	Catalase	CAT	sp|P04040|CATA_HUMAN Catalase OS=Homo sapiens OX=9606 GN=CAT PE=1 SV=3	1	0	0	1	2	2	2	0	0	0	0	0	0	0	0	0	0	0	0	0	0	0	0	0	0	1	0	1	0	0	0	0	0	0	0	0	0	0	0	0	0	0
P05109	P05109	2	2	2	Protein S100-A8;Protein S100-A8, N-terminally processed	S100A8	sp|P05109|S10A8_HUMAN Protein S100-A8 OS=Homo sapiens OX=9606 GN=S100A8 PE=1 SV=1	1	0	0	1	2	2	2	0	0	0	0	0	0	0	0	0	0	0	1	0	1	1	2	1	1	0	1	0	0	0	0	0	0	0	0	0	0	0	0	1	0	1
P06702	P06702	1	1	1	Protein S100-A9	S100A9	sp|P06702|S10A9_HUMAN Protein S100-A9 OS=Homo sapiens OX=9606 GN=S100A9 PE=1 SV=1	1	0	0	1	1	1	1	0	0	0	0	0	0	0	0	0	0	0	0	0	0	1	1	1	1	0	0	0	0	0	0	0	0	0	0	0	0	0	0	0	0	0
P08754	P08754	5	4	3	Guanine nucleotide-binding protein G(k) subunit alpha	GNAI3	sp|P08754|GNAI3_HUMAN Guanine nucleotide-binding protein G(i) subunit alpha OS=Homo sapiens OX=9606 GN=GNAI3 PE=1 SV=3	1	0	0	1	5	4	3	1	1	1	1	1	1	2	0	0	1	1	2	2	3	3	2	1	2	1	2	1	0	0	0	0	0	0	1	0	0	0	0	1	1	2
P09874;Q5VX84;Q5VX85	P09874	16;1;1	16;1;1	16;1;1	Poly [ADP-ribose] polymerase 1	PARP1	sp|P09874|PARP1_HUMAN Poly [ADP-ribose] polymerase 1 OS=Homo sapiens OX=9606 GN=PARP1 PE=1 SV=4	1	4	2	3	16	16	16	3	2	1	1	2	0	2	0	0	5	0	14	1	1	3	0	0	1	1	1	0	3	2	1	1	2	0	2	0	0	5	0	14	1	1
P11169;Q8TDB8	P11169;Q8TDB8	1;1	1;1	1;1	Solute carrier family 2, facilitated glucose transporter member 3;Solute carrier family 2, facilitated glucose transporter member 14	SLC2A3;SLC2A14	sp|P11169|GTR3_HUMAN Solute carrier family 2, facilitated glucose transporter member 3 OS=Homo sapiens OX=9606 GN=SLC2A3 PE=1 SV=1;sp|Q8TDB8|GTR14_HUMAN Solute carrier family 2, facilitated glucose transporter member 14 OS=Homo sapiens OX=9606 GN=SLC2A14 P	1	0	0	2	1	1	1	1	1	0	0	0	0	0	0	0	0	0	0	0	0	0	1	0	0	0	0	1	1	1	0	0	0	0	0	0	0	0	0	0	0	0
P13473	P13473	1	1	1	Lysosome-associated membrane glycoprotein 2	LAMP2	sp|P13473|LAMP2_HUMAN Lysosome-associated membrane glycoprotein 2 OS=Homo sapiens OX=9606 GN=LAMP2 PE=1 SV=2	1	0	0	1	1	1	1	1	1	0	0	0	0	0	0	0	1	0	1	1	0	1	1	0	0	0	0	0	1	1	0	0	0	0	0	0	0	1	0	1	1	0
P14550;V9GYG2;V9GYP9;Q5T621	P14550;V9GYG2;V9GYP9;Q5T621	2;1;1;1	2;1;1;1	2;1;1;1	Alcohol dehydrogenase [NADP(+)]	AKR1A1	sp|P14550|AK1A1_HUMAN Aldo-keto reductase family 1 member A1 OS=Homo sapiens OX=9606 GN=AKR1A1 PE=1 SV=3;tr|V9GYG2|V9GYG2_HUMAN Aldo-keto reductase family 1 member A1 OS=Homo sapiens OX=9606 GN=AKR1A1 PE=1 SV=1;tr|V9GYP9|V9GYP9_HUMAN Aldo-keto reductase fa	1	0	0	4	2	2	2	1	0	0	0	0	0	0	0	0	0	0	1	1	1	1	0	0	0	1	0	0	1	0	0	0	0	0	0	0	0	0	0	1	1	1
P14618;B4DNK4;H3BTN5;H3BQ34;H3BT25;H3BUW1;H3BTJ2;H3BU13;H3BN34;H3BQZ3;H3BR70	P14618;B4DNK4;H3BTN5;H3BQ34	7;6;5;4;3;3;3;2;1;1;1	7;6;5;4;3;3;3;2;1;1;1	7;6;5;4;3;3;3;2;1;1;1	Pyruvate kinase PKM;Pyruvate kinase	PKM	sp|P14618|KPYM_HUMAN Pyruvate kinase PKM OS=Homo sapiens OX=9606 GN=PKM PE=1 SV=4;tr|B4DNK4|B4DNK4_HUMAN Pyruvate kinase OS=Homo sapiens OX=9606 GN=PKM PE=1 SV=1;tr|H3BTN5|H3BTN5_HUMAN Pyruvate kinase (Fragment) OS=Homo sapiens OX=9606 GN=PKM PE=1 SV=1;tr|	1	0	2	11	7	7	7	4	3	1	1	1	0	1	0	0	2	0	3	1	1	2	2	0	1	1	1	0	4	3	1	1	1	0	1	0	0	2	0	3	1	1
P15924	P15924	12	12	12	Desmoplakin	DSP	sp|P15924|DESP_HUMAN Desmoplakin OS=Homo sapiens OX=9606 GN=DSP PE=1 SV=3	1	0	0	1	12	12	12	0	0	0	0	0	0	0	0	0	0	0	3	3	2	0	6	1	2	0	0	0	0	0	0	0	0	0	0	0	0	0	0	3	3	2
P23284	P23284	1	1	1	Peptidyl-prolyl cis-trans isomerase B	PPIB	sp|P23284|PPIB_HUMAN Peptidyl-prolyl cis-trans isomerase B OS=Homo sapiens OX=9606 GN=PPIB PE=1 SV=2	1	0	0	1	1	1	1	0	0	0	0	0	0	0	0	0	0	0	0	0	1	1	1	0	0	0	0	0	0	0	0	0	0	0	0	0	0	0	0	0	0	1
P26196;Q8IV96	P26196	3;1	3;1	3;1	Probable ATP-dependent RNA helicase DDX6	DDX6	sp|P26196|DDX6_HUMAN Probable ATP-dependent RNA helicase DDX6 OS=Homo sapiens OX=9606 GN=DDX6 PE=1 SV=2	1	0	0	2	3	3	3	0	0	0	0	0	0	0	0	0	0	0	0	0	1	1	1	1	1	1	1	0	0	0	0	0	0	0	0	0	0	0	0	0	0	1
P29966	P29966	4	4	4	Myristoylated alanine-rich C-kinase substrate	MARCKS	sp|P29966|MARCS_HUMAN Myristoylated alanine-rich C-kinase substrate OS=Homo sapiens OX=9606 GN=MARCKS PE=1 SV=4	1	0	1	1	4	4	4	0	1	0	1	0	0	0	0	0	0	0	3	0	1	2	1	1	1	1	1	0	0	1	0	1	0	0	0	0	0	0	0	3	0	1
P30086	P30086	2	2	2	Phosphatidylethanolamine-binding protein 1;Hippocampal cholinergic neurostimulating peptide	PEBP1	sp|P30086|PEBP1_HUMAN Phosphatidylethanolamine-binding protein 1 OS=Homo sapiens OX=9606 GN=PEBP1 PE=1 SV=3	1	0	0	1	2	2	2	0	0	0	0	0	0	0	0	0	0	0	0	1	1	1	0	0	0	0	1	0	0	0	0	0	0	0	0	0	0	0	0	0	1	1
P30825;Q5JR49;A0A1W2PR06;P52569	P30825	4;1;1;1	4;1;1;1	4;1;1;1	High affinity cationic amino acid transporter 1	SLC7A1	sp|P30825|SL7A1_HUMAN High affinity cationic amino acid transporter 1 OS=Homo sapiens OX=9606 GN=SLC7A1 PE=1 SV=1	1	0	0	4	4	4	4	0	0	0	0	0	0	0	0	0	0	0	0	0	0	2	1	2	0	1	0	0	0	0	0	0	0	0	0	0	0	0	0	0	0	0
P31948;H0YGI8	P31948;H0YGI8	2;1	2;1	2;1	Stress-induced-phosphoprotein 1	STIP1	sp|P31948|STIP1_HUMAN Stress-induced-phosphoprotein 1 OS=Homo sapiens OX=9606 GN=STIP1 PE=1 SV=1;tr|H0YGI8|H0YGI8_HUMAN Stress-induced-phosphoprotein 1 (Fragment) OS=Homo sapiens OX=9606 GN=STIP1 PE=1 SV=1	1	0	0	2	2	2	2	1	1	0	1	0	0	0	0	0	0	0	0	1	1	1	1	0	0	0	0	0	1	1	0	1	0	0	0	0	0	0	0	0	1	1
P32119;A6NIW5	P32119;A6NIW5	2;1	2;1	1;1	Peroxiredoxin-2	PRDX2	sp|P32119|PRDX2_HUMAN Peroxiredoxin-2 OS=Homo sapiens OX=9606 GN=PRDX2 PE=1 SV=5;tr|A6NIW5|A6NIW5_HUMAN Peroxiredoxin 2, isoform CRA_a OS=Homo sapiens OX=9606 GN=PRDX2 PE=1 SV=2	1	0	0	2	2	2	1	0	1	0	1	0	1	1	0	1	1	1	1	1	1	0	1	0	1	0	1	1	0	1	0	1	0	1	1	0	1	1	1	1	1	1
P35326;P35325;P22532;P22531;Q9BYE4	P35326;P35325;P22532;P22531;Q9BYE4	1;1;1;1;1	1;1;1;1;1	1;1;1;1;1	Small proline-rich protein 2A;Small proline-rich protein 2B;Small proline-rich protein 2D;Small proline-rich protein 2E;Small proline-rich protein 2G	SPRR2A;SPRR2B;SPRR2D;SPRR2E;SPRR2G	sp|P35326|SPR2A_HUMAN Small proline-rich protein 2A OS=Homo sapiens OX=9606 GN=SPRR2A PE=1 SV=1;sp|P35325|SPR2B_HUMAN Small proline-rich protein 2B OS=Homo sapiens OX=9606 GN=SPRR2B PE=2 SV=1;sp|P22532|SPR2D_HUMAN Small proline-rich protein 2D OS=Homo sapi	1	0	0	5	1	1	1	0	0	0	0	0	0	0	0	0	0	0	0	0	0	0	1	0	0	0	0	0	0	0	0	0	0	0	0	0	0	0	0	0	0	0
P37108;H0YLA2	P37108;H0YLA2	3;2	3;2	3;2	Signal recognition particle 14 kDa protein	2014-08-01	sp|P37108|SRP14_HUMAN Signal recognition particle 14 kDa protein OS=Homo sapiens OX=9606 GN=SRP14 PE=1 SV=2;tr|H0YLA2|H0YLA2_HUMAN Signal recognition particle 14 kDa protein OS=Homo sapiens OX=9606 GN=SRP14 PE=1 SV=1	1	0	0	2	3	3	3	1	1	1	0	0	0	1	0	0	0	0	0	1	1	1	1	1	0	0	0	0	1	1	1	0	0	0	1	0	0	0	0	0	1	1
P43121	P43121	1	1	1	Cell surface glycoprotein MUC18	MCAM	sp|P43121|MUC18_HUMAN Cell surface glycoprotein MUC18 OS=Homo sapiens OX=9606 GN=MCAM PE=1 SV=2	1	0	0	1	1	1	1	0	0	0	0	0	0	0	0	0	0	0	0	0	0	1	0	0	0	0	0	0	0	0	0	0	0	0	0	0	0	0	0	0	0	0
P46109	P46109	2	2	2	Crk-like protein	CRKL	sp|P46109|CRKL_HUMAN Crk-like protein OS=Homo sapiens OX=9606 GN=CRKL PE=1 SV=1	1	0	0	1	2	2	2	1	0	0	0	0	0	0	0	0	0	0	0	0	1	0	0	0	0	0	0	0	1	0	0	0	0	0	0	0	0	0	0	0	0	1
P48730;H7BYT1;J3KRM8;B4DLF1	P48730;H7BYT1	13;12;1;1	4;3;1;1	4;3;1;1	Casein kinase I isoform delta	CSNK1D	sp|P48730|KC1D_HUMAN Casein kinase I isoform delta OS=Homo sapiens OX=9606 GN=CSNK1D PE=1 SV=2;tr|H7BYT1|H7BYT1_HUMAN Casein kinase I isoform delta OS=Homo sapiens OX=9606 GN=CSNK1D PE=1 SV=2	1	0	0	4	13	4	4	3	1	0	0	2	0	0	0	0	0	0	0	5	8	8	6	3	5	2	3	3	2	1	0	0	1	0	0	0	0	0	0	0	1	2
P52292;J3QLL0;J3KS65	P52292	4;1;1	4;1;1	4;1;1	Importin subunit alpha-1	KPNA2	sp|P52292|IMA1_HUMAN Importin subunit alpha-1 OS=Homo sapiens OX=9606 GN=KPNA2 PE=1 SV=1	1	2	0	3	4	4	4	2	2	0	0	0	0	0	0	0	0	0	0	1	3	3	1	1	1	0	0	0	2	2	0	0	0	0	0	0	0	0	0	0	1	3
P60709;A0A2R8Y793;G5E9R0;E7EVS6;A0A2R8YGF8;C9JUM1;C9JZR7;C9JTX5;A0A2R8YEA7;Q9BYX7;F8WCH0;A0A2R8YFE2	P60709;A0A2R8Y793;G5E9R0;E7EVS6;A0A2R8YGF8	24;22;12;12;12;10;10;9;7;4;3;2	1;1;1;1;1;1;1;1;0;0;0;0	1;1;1;1;1;1;1;1;0;0;0;0	Actin, cytoplasmic 1;Actin, cytoplasmic 1, N-terminally processed	ACTB	sp|P60709|ACTB_HUMAN Actin, cytoplasmic 1 OS=Homo sapiens OX=9606 GN=ACTB PE=1 SV=1;tr|A0A2R8Y793|A0A2R8Y793_HUMAN Actin, cytoplasmic 1 (Fragment) OS=Homo sapiens OX=9606 GN=ACTB PE=1 SV=1;tr|G5E9R0|G5E9R0_HUMAN Actin, cytoplasmic 1 OS=Homo sapiens OX=9606	1	0	0	12	24	1	1	13	12	11	7	12	5	7	3	5	5	6	7	9	9	11	10	10	8	7	8	9	1	1	1	1	1	1	0	0	0	0	0	1	0	0
P60763;J3KSC4;J3QLK0;A0A3B3IRV0;F8WET9;B1AH79;A0A494C1M1;G3V4H1;A0A494BZX6;G3V476;P17081;Q9H4E5	P60763;J3KSC4;J3QLK0	6;4;4;1;1;1;1;1;1;1;1;1	1;1;1;0;0;0;0;0;0;0;0;0	1;1;1;0;0;0;0;0;0;0;0;0	Ras-related C3 botulinum toxin substrate 3	RAC3	sp|P60763|RAC3_HUMAN Ras-related C3 botulinum toxin substrate 3 OS=Homo sapiens OX=9606 GN=RAC3 PE=1 SV=1;tr|J3KSC4|J3KSC4_HUMAN Ras-related C3 botulinum toxin substrate 3 (Fragment) OS=Homo sapiens OX=9606 GN=RAC3 PE=1 SV=1;tr|J3QLK0|J3QLK0_HUMAN Ras-rela	1	0	0	12	6	1	1	2	4	0	2	1	0	2	1	1	1	1	2	2	2	4	4	3	2	2	3	1	0	0	0	1	0	0	0	0	0	0	0	0	0	0
P62070;E9PK85;P10301;E9PQK5;E9PQC5	P62070;E9PK85;P10301	3;2;2;1;1	3;2;2;1;1	3;2;2;1;1	Ras-related protein R-Ras2;Ras-related protein R-Ras	RRAS2;RRAS	sp|P62070|RRAS2_HUMAN Ras-related protein R-Ras2 OS=Homo sapiens OX=9606 GN=RRAS2 PE=1 SV=1;tr|E9PK85|E9PK85_HUMAN Ras-related protein R-Ras2 (Fragment) OS=Homo sapiens OX=9606 GN=RRAS2 PE=1 SV=1;sp|P10301|RRAS_HUMAN Ras-related protein R-Ras OS=Homo sapie	1	0	0	5	3	3	3	0	1	0	1	0	0	0	0	0	0	0	0	0	1	2	0	3	2	2	1	1	0	1	0	1	0	0	0	0	0	0	0	0	0	1
P62136;H0Y3Y6;E7ETD8;E9PMD7;F8VR82;F8VYE8;F8W0W8;P36873	P62136;H0Y3Y6;E7ETD8;E9PMD7;F8VR82;F8VYE8;F8W0W8;P36873	2;1;1;1;1;1;1;1	2;1;1;1;1;1;1;1	1;0;0;1;0;0;0;0	Serine/threonine-protein phosphatase PP1-alpha catalytic subunit;Serine/threonine-protein phosphatase;Serine/threonine-protein phosphatase PP1-gamma catalytic subunit	PPP1CA;PPP1CB;PPP1CC	sp|P62136|PP1A_HUMAN Serine/threonine-protein phosphatase PP1-alpha catalytic subunit OS=Homo sapiens OX=9606 GN=PPP1CA PE=1 SV=1;tr|H0Y3Y6|H0Y3Y6_HUMAN Serine/threonine-protein phosphatase PP1-beta catalytic subunit (Fragment) OS=Homo sapiens OX=9606 GN=P	1	0	0	8	2	2	1	1	0	0	0	0	0	0	0	0	0	0	0	0	1	1	0	0	0	0	0	0	1	0	0	0	0	0	0	0	0	0	0	0	0	1
P62318	P62318	1	1	1	Small nuclear ribonucleoprotein Sm D3	SNRPD3	sp|P62318|SMD3_HUMAN Small nuclear ribonucleoprotein Sm D3 OS=Homo sapiens OX=9606 GN=SNRPD3 PE=1 SV=1	1	0	0	1	1	1	1	0	0	0	0	0	0	0	0	0	0	0	1	1	1	1	1	1	1	1	0	1	0	0	0	0	0	0	0	0	0	0	0	1	1	1
P62330	P62330	3	3	3	ADP-ribosylation factor 6	ARF6	sp|P62330|ARF6_HUMAN ADP-ribosylation factor 6 OS=Homo sapiens OX=9606 GN=ARF6 PE=1 SV=2	1	0	0	1	3	3	3	0	0	0	0	0	0	0	0	0	0	0	0	1	2	1	2	1	0	1	1	0	0	0	0	0	0	0	0	0	0	0	0	0	1	2
P62834;A0A075B6Q0	P62834;A0A075B6Q0	10;6	2;1	2;1	Ras-related protein Rap-1A	RAP1A	sp|P62834|RAP1A_HUMAN Ras-related protein Rap-1A OS=Homo sapiens OX=9606 GN=RAP1A PE=1 SV=1;tr|A0A075B6Q0|A0A075B6Q0_HUMAN Ras-related protein Rap-1A (Fragment) OS=Homo sapiens OX=9606 GN=RAP1A PE=1 SV=1	1	0	0	2	10	2	2	3	3	2	2	1	1	1	0	0	1	1	1	4	8	8	2	2	3	4	3	1	0	0	0	1	0	1	0	0	0	0	0	0	1	1
P62993;J3KT38	P62993	3;1	3;1	3;1	Growth factor receptor-bound protein 2	GRB2	sp|P62993|GRB2_HUMAN Growth factor receptor-bound protein 2 OS=Homo sapiens OX=9606 GN=GRB2 PE=1 SV=1	1	0	0	2	3	3	3	0	0	0	0	1	0	1	0	0	0	0	0	0	1	1	0	0	0	0	0	0	0	0	0	0	1	0	1	0	0	0	0	0	0	1
P68133;P68032;P63267;P62736;A6NL76;C9JFL5;F6UVQ4;F6QUT6;F8WB63;B8ZZJ2	P68133;P68032;P63267;P62736;A6NL76;C9JFL5;F6UVQ4;F6QUT6;F8WB63;B8ZZJ2	16;15;14;14;13;10;10;10;9;9	3;2;2;2;3;2;2;2;1;1	3;2;2;2;3;2;2;2;1;1	Actin, alpha skeletal muscle;Actin, alpha cardiac muscle 1;Actin, gamma-enteric smooth muscle;Actin, aortic smooth muscle	ACTA1;ACTC1;ACTG2;ACTA2	sp|P68133|ACTS_HUMAN Actin, alpha skeletal muscle OS=Homo sapiens OX=9606 GN=ACTA1 PE=1 SV=1;sp|P68032|ACTC_HUMAN Actin, alpha cardiac muscle 1 OS=Homo sapiens OX=9606 GN=ACTC1 PE=1 SV=1;sp|P63267|ACTH_HUMAN Actin, gamma-enteric smooth muscle OS=Homo sapie	1	0	0	10	16	3	3	7	4	7	4	6	4	8	3	5	3	3	3	5	4	5	6	6	6	4	3	6	0	0	0	0	0	0	2	0	0	0	0	0	1	1
P78368;K7ESB6;A0A087WZK4;A0A087WW97;A0A087WWF5;U3KQA5;A0A0U1RQT7;Q8IXA3;A0A0U1RQY7;U3KQB3;Q9HCP0;A0A0U1RQK2;A0A0U1RR14;A0A087WXD7;K7EP38;A0A0U1RRH5;K7EJC0;A0A0U1RQH9	P78368;K7ESB6;A0A087WZK4	8;5;4;3;3;3;3;3;3;3;3;2;2;2;1;1;1;1	3;2;1;1;1;0;0;0;0;0;0;0;0;1;0;0;0;0	2;2;0;0;1;0;0;0;0;0;0;0;0;1;0;0;0;0	Casein kinase I isoform gamma-2	CSNK1G2	sp|P78368|KC1G2_HUMAN Casein kinase I isoform gamma-2 OS=Homo sapiens OX=9606 GN=CSNK1G2 PE=1 SV=1;tr|K7ESB6|K7ESB6_HUMAN Casein kinase I isoform gamma-2 (Fragment) OS=Homo sapiens OX=9606 GN=CSNK1G2 PE=1 SV=1;tr|A0A087WZK4|A0A087WZK4_HUMAN Casein kinase I	1	0	0	18	8	3	2	0	1	0	0	2	0	0	0	0	0	0	0	3	3	4	1	2	2	1	2	1	0	0	0	0	0	0	0	0	0	0	0	0	0	2
Q01469	Q01469	1	1	1	Fatty acid-binding protein, epidermal	FABP5	sp|Q01469|FABP5_HUMAN Fatty acid-binding protein 5 OS=Homo sapiens OX=9606 GN=FABP5 PE=1 SV=3	1	0	0	1	1	1	1	0	0	0	0	0	0	0	0	0	0	0	1	1	1	1	1	1	0	1	0	0	0	0	0	0	0	0	0	0	0	0	0	1	1	1
Q08554	Q08554	2	2	2	Desmocollin-1	DSC1	sp|Q08554|DSC1_HUMAN Desmocollin-1 OS=Homo sapiens OX=9606 GN=DSC1 PE=1 SV=2	1	0	0	1	2	2	2	0	0	0	0	0	0	0	0	0	0	0	1	1	1	1	1	0	2	1	0	0	0	0	0	0	0	0	0	0	0	0	0	1	1	1
Q10567;C9J1E7	Q10567;C9J1E7	13;11	2;1	2;1	AP-1 complex subunit beta-1	AP1B1	sp|Q10567|AP1B1_HUMAN AP-1 complex subunit beta-1 OS=Homo sapiens OX=9606 GN=AP1B1 PE=1 SV=2;tr|C9J1E7|C9J1E7_HUMAN AP-1 complex subunit beta-1 (Fragment) OS=Homo sapiens OX=9606 GN=AP1B1 PE=1 SV=1	1	0	0	2	13	2	2	1	3	1	1	1	0	1	1	0	0	0	0	5	7	8	6	6	3	3	6	2	0	1	0	0	0	0	0	0	0	0	0	0	0	1
Q13835	Q13835	1	1	1	Plakophilin-1	PKP1	sp|Q13835|PKP1_HUMAN Plakophilin-1 OS=Homo sapiens OX=9606 GN=PKP1 PE=1 SV=2	1	0	0	1	1	1	1	0	0	0	0	0	0	0	0	0	0	0	0	0	0	0	1	0	0	0	0	0	0	0	0	0	0	0	0	0	0	0	0	0	0	0
Q14344	Q14344	2	2	2	Guanine nucleotide-binding protein subunit alpha-13	GNA13	sp|Q14344|GNA13_HUMAN Guanine nucleotide-binding protein subunit alpha-13 OS=Homo sapiens OX=9606 GN=GNA13 PE=1 SV=2	1	0	0	1	2	2	2	0	0	0	1	0	0	0	0	0	0	0	0	0	1	0	0	0	0	0	0	0	0	0	0	1	0	0	0	0	0	0	0	0	0	1
Q5H936;Q13530	Q5H936;Q13530	1;1	1;1	1;1	Serine incorporator 3	SERINC3	tr|Q5H936|Q5H936_HUMAN Serine incorporator 3 (Fragment) OS=Homo sapiens OX=9606 GN=SERINC3 PE=1 SV=1;sp|Q13530|SERC3_HUMAN Serine incorporator 3 OS=Homo sapiens OX=9606 GN=SERINC3 PE=2 SV=2	1	0	0	2	1	1	1	0	0	0	0	0	0	0	0	0	0	0	0	1	1	1	0	1	1	1	1	0	0	0	0	0	0	0	0	0	0	0	0	0	1	1
Q5T0F9;H0Y517;H7C1U3	Q5T0F9;H0Y517;H7C1U3	2;1;1	2;1;1	2;1;1	Coiled-coil and C2 domain-containing protein 1B	CC2D1B	sp|Q5T0F9|C2D1B_HUMAN Coiled-coil and C2 domain-containing protein 1B OS=Homo sapiens OX=9606 GN=CC2D1B PE=1 SV=1;tr|H0Y517|H0Y517_HUMAN Coiled-coil and C2 domain-containing protein 1B (Fragment) OS=Homo sapiens OX=9606 GN=CC2D1B PE=1 SV=1;tr|H7C1U3|H7C1U3	1	0	0	3	2	2	2	0	0	0	0	0	0	1	0	0	0	0	0	0	0	0	1	0	0	0	0	0	0	0	0	0	0	0	1	0	0	0	0	0	0	0
Q5VSP4;P31025	Q5VSP4;P31025	1;1	1;1	1;1	Putative lipocalin 1-like protein 1;Lipocalin-1	LCN1P1;LCN1	sp|Q5VSP4|LC1L1_HUMAN Putative lipocalin 1-like protein 1 OS=Homo sapiens OX=9606 GN=LCN1P1 PE=5 SV=1;sp|P31025|LCN1_HUMAN Lipocalin-1 OS=Homo sapiens OX=9606 GN=LCN1 PE=1 SV=1	1	0	0	2	1	1	1	0	0	0	0	0	0	0	0	0	0	0	0	0	1	0	0	0	0	0	0	0	0	0	0	0	0	0	0	0	0	0	0	0	0	1
Q5VZR0;Q9H4G4;A0A087WUM5	Q5VZR0;Q9H4G4;A0A087WUM5	2;2;1	2;2;1	2;2;1	Golgi-associated plant pathogenesis-related protein 1	GLIPR2	tr|Q5VZR0|Q5VZR0_HUMAN Golgi-associated plant pathogenesis-related protein 1 OS=Homo sapiens OX=9606 GN=GLIPR2 PE=1 SV=1;sp|Q9H4G4|GAPR1_HUMAN Golgi-associated plant pathogenesis-related protein 1 OS=Homo sapiens OX=9606 GN=GLIPR2 PE=1 SV=3;tr|A0A087WUM5|A	1	0	0	3	2	2	2	0	0	0	0	0	0	1	0	0	0	0	0	0	0	0	0	1	1	0	0	0	0	0	0	0	0	0	1	0	0	0	0	0	0	0
Q8IWA5;K7EPV6;K7ESF5	Q8IWA5;K7EPV6;K7ESF5	2;1;1	2;1;1	2;1;1	Choline transporter-like protein 2	SLC44A2	sp|Q8IWA5|CTL2_HUMAN Choline transporter-like protein 2 OS=Homo sapiens OX=9606 GN=SLC44A2 PE=1 SV=3;tr|K7EPV6|K7EPV6_HUMAN Choline transporter-like protein 2 (Fragment) OS=Homo sapiens OX=9606 GN=SLC44A2 PE=1 SV=1;tr|K7ESF5|K7ESF5_HUMAN Choline transporte	1	0	0	3	2	2	2	0	0	0	0	0	0	0	0	0	0	0	0	0	2	1	0	0	0	0	0	0	0	0	0	0	0	0	0	0	0	0	0	0	0	2
Q8NBT0	Q8NBT0	1	1	1	POC1 centriolar protein homolog A	POC1A	sp|Q8NBT0|POC1A_HUMAN POC1 centriolar protein homolog A OS=Homo sapiens OX=9606 GN=POC1A PE=1 SV=2	1	0	0	1	1	1	1	0	0	0	0	0	0	0	0	0	0	0	0	0	1	1	0	0	0	0	0	0	0	0	0	0	0	0	0	0	0	0	0	0	0	1
Q8WUY9	Q8WUY9	1	1	1	DEP domain-containing protein 1B	DEPDC1B	sp|Q8WUY9|DEP1B_HUMAN DEP domain-containing protein 1B OS=Homo sapiens OX=9606 GN=DEPDC1B PE=1 SV=2	1	0	0	1	1	1	1	0	0	0	0	0	0	0	0	0	0	0	0	0	0	0	0	1	0	0	0	0	0	0	0	0	0	0	0	0	0	0	0	0	0	0
Q969E2;K7EJJ4;C9JWM2	Q969E2;K7EJJ4;C9JWM2	2;1;1	2;1;1	2;1;1	Secretory carrier-associated membrane protein 4	SCAMP4	sp|Q969E2|SCAM4_HUMAN Secretory carrier-associated membrane protein 4 OS=Homo sapiens OX=9606 GN=SCAMP4 PE=1 SV=1;tr|K7EJJ4|K7EJJ4_HUMAN Secretory carrier-associated membrane protein (Fragment) OS=Homo sapiens OX=9606 GN=SCAMP4 PE=1 SV=2;tr|C9JWM2|C9JWM2_H	1	0	0	3	2	2	2	1	1	1	0	1	0	0	0	0	0	0	0	0	1	1	0	0	0	0	0	0	1	1	1	0	1	0	0	0	0	0	0	0	0	1
Q96P63	Q96P63	1	1	1	Serpin B12	SERPINB12	sp|Q96P63|SPB12_HUMAN Serpin B12 OS=Homo sapiens OX=9606 GN=SERPINB12 PE=1 SV=1	1	0	0	1	1	1	1	0	0	0	0	0	0	0	0	0	0	0	1	1	0	0	0	0	1	0	1	0	0	0	0	0	0	0	0	0	0	0	0	1	1	0
Q96RF0	Q96RF0	4	4	4	Sorting nexin-18	SNX18	sp|Q96RF0|SNX18_HUMAN Sorting nexin-18 OS=Homo sapiens OX=9606 GN=SNX18 PE=1 SV=2	1	0	0	1	4	4	4	1	0	0	0	0	0	0	0	0	0	0	0	0	1	2	0	1	1	0	0	0	1	0	0	0	0	0	0	0	0	0	0	0	0	1
Q99698	Q99698	1	1	1	Lysosomal-trafficking regulator	LYST	sp|Q99698|LYST_HUMAN Lysosomal-trafficking regulator OS=Homo sapiens OX=9606 GN=LYST PE=1 SV=3	1	0	0	1	1	1	1	1	0	0	1	0	1	1	0	0	0	0	0	1	1	0	0	0	1	0	1	1	1	0	0	1	0	1	1	0	0	0	0	0	1	1
Q9BX67	Q9BX67	2	2	2	Junctional adhesion molecule C	JAM3	sp|Q9BX67|JAM3_HUMAN Junctional adhesion molecule C OS=Homo sapiens OX=9606 GN=JAM3 PE=1 SV=1	1	0	0	1	2	2	2	0	0	0	0	0	0	0	0	0	0	0	0	1	0	2	0	0	0	1	1	0	0	0	0	0	0	0	0	0	0	0	0	0	1	0
Q9BY43;H0YIN6;E9PQI5;E9PQ80;E9PSI1	Q9BY43;H0YIN6;E9PQI5;E9PQ80;E9PSI1	2;1;1;1;1	2;1;1;1;1	2;1;1;1;1	Charged multivesicular body protein 4a	CHMP4A	sp|Q9BY43|CHM4A_HUMAN Charged multivesicular body protein 4a OS=Homo sapiens OX=9606 GN=CHMP4A PE=1 SV=3;tr|H0YIN6|H0YIN6_HUMAN Charged multivesicular body protein 4a OS=Homo sapiens OX=9606 GN=CHMP4A PE=1 SV=2;tr|E9PQI5|E9PQI5_HUMAN Charged multivesicular	1	0	0	5	2	2	2	1	1	0	0	0	0	0	0	0	0	0	0	1	1	1	1	1	0	1	1	0	1	1	0	0	0	0	0	0	0	0	0	0	1	1
Q9NQP5;A6PVK5;P00488	Q9NQP5;A6PVK5;P00488	1;1;1	1;1;1	1;1;1	Coagulation factor XIII A chain	F13A1	tr|Q9NQP5|Q9NQP5_HUMAN Coagulation factor XIII A chain (Fragment) OS=Homo sapiens OX=9606 GN=F13A1 PE=1 SV=2;tr|A6PVK5|A6PVK5_HUMAN Coagulation factor XIII A chain (Fragment) OS=Homo sapiens OX=9606 GN=F13A1 PE=1 SV=9;sp|P00488|F13A_HUMAN Coagulation facto	1	0	0	3	1	1	1	0	0	0	0	0	0	0	0	0	0	0	1	1	0	0	0	0	0	0	0	0	0	0	0	0	0	0	0	0	0	0	0	1	1	0
Q9NRX5	Q9NRX5	2	2	2	Serine incorporator 1	SERINC1	sp|Q9NRX5|SERC1_HUMAN Serine incorporator 1 OS=Homo sapiens OX=9606 GN=SERINC1 PE=1 SV=1	1	0	0	1	2	2	2	1	0	1	0	0	0	0	0	0	0	0	0	0	1	1	0	1	1	0	0	0	1	0	1	0	0	0	0	0	0	0	0	0	0	1
Q9NZT1	Q9NZT1	2	2	2	Calmodulin-like protein 5	CALML5	sp|Q9NZT1|CALL5_HUMAN Calmodulin-like protein 5 OS=Homo sapiens OX=9606 GN=CALML5 PE=1 SV=2	1	0	0	1	2	2	2	0	0	0	0	0	0	0	0	0	0	0	0	0	0	1	1	0	0	1	0	0	0	0	0	0	0	0	0	0	0	0	0	0	0	0
Q9UJX3	Q9UJX3	1	1	1	Anaphase-promoting complex subunit 7	ANAPC7	sp|Q9UJX3|APC7_HUMAN Anaphase-promoting complex subunit 7 OS=Homo sapiens OX=9606 GN=ANAPC7 PE=1 SV=4	1	0	0	1	1	1	1	0	0	0	0	0	0	0	0	0	0	0	0	0	1	0	0	0	0	0	0	0	0	0	0	0	0	0	0	0	0	0	0	0	0	1
Q9UL25	Q9UL25	1	1	1	Ras-related protein Rab-21	RAB21	sp|Q9UL25|RAB21_HUMAN Ras-related protein Rab-21 OS=Homo sapiens OX=9606 GN=RAB21 PE=1 SV=3	1	0	0	1	1	1	1	0	0	0	0	0	0	0	0	0	0	0	0	0	1	0	1	0	0	0	0	0	0	0	0	0	0	0	0	0	0	0	0	0	0	1
Q9Y3E7	Q9Y3E7	3	3	3	Charged multivesicular body protein 3	CHMP3	sp|Q9Y3E7|CHMP3_HUMAN Charged multivesicular body protein 3 OS=Homo sapiens OX=9606 GN=CHMP3 PE=1 SV=3	1	0	0	1	3	3	3	0	1	0	0	0	0	0	0	0	0	0	0	1	2	1	0	1	1	0	1	0	0	1	0	0	0	0	0	0	0	0	0	0	1	2
Q9Y5V3;Q5H907;Q5H909;Q9UNF1;Q96JG8	Q9Y5V3	4;1;1;1;1	4;1;1;1;1	4;1;1;1;1	Melanoma-associated antigen D1	MAGED1	sp|Q9Y5V3|MAGD1_HUMAN Melanoma-associated antigen D1 OS=Homo sapiens OX=9606 GN=MAGED1 PE=1 SV=3	1	0	0	5	4	4	4	0	0	0	0	0	0	0	0	0	0	0	0	0	1	1	2	1	0	0	0	0	0	0	0	0	0	0	0	0	0	0	0	0	0	1
S4R3V8;Q86X29	S4R3V8;Q86X29	1;1	1;1	1;1	Lipolysis-stimulated lipoprotein receptor	LSR	tr|S4R3V8|S4R3V8_HUMAN Lipolysis-stimulated lipoprotein receptor OS=Homo sapiens OX=9606 GN=LSR PE=1 SV=2;sp|Q86X29|LSR_HUMAN Lipolysis-stimulated lipoprotein receptor OS=Homo sapiens OX=9606 GN=LSR PE=1 SV=4	1	0	0	2	1	1	1	0	0	0	0	0	0	0	0	0	0	0	0	0	1	1	0	1	0	0	0	0	0	0	0	0	0	0	0	0	0	0	0	0	0	1
[truncated: 134 more columns]

## Sheet: dG-patch
Protein IDs	Majority protein IDs	Peptide counts (all)	Peptide counts (razor+unique)	Peptide counts (unique)	Protein names	Gene names	Fasta headers	count_WT	count_dG-patch	count_mock	Number of proteins	Peptides	Razor + unique peptides	Unique peptides	Peptides dG-patch_1-1	Peptides dG-patch_1-2	Peptides dG-patch_1-3	Peptides dG-patch_2-1	Peptides dG-patch_2-2	Peptides dG-patch_2-3	Peptides dG-patch_3-1	Peptides dG-patch_3-2	Peptides dG-patch_3-3	Peptides mock_1	Peptides mock_2	Peptides mock_3	Peptides WT_1-1	Peptides WT_1-2	Peptides WT_1-3	Peptides WT_2-1	Peptides WT_2-2	Peptides WT_2-3	Peptides WT_3-1	Peptides WT_3-2	Peptides WT_3-3	Razor + unique peptides dG-patch_1-1	Razor + unique peptides dG-patch_1-2	Razor + unique peptides dG-patch_1-3	Razor + unique peptides dG-patch_2-1	Razor + unique peptides dG-patch_2-2	Razor + unique peptides dG-patch_2-3	Razor + unique peptides dG-patch_3-1	Razor + unique peptides dG-patch_3-2	Razor + unique peptides dG-patch_3-3	Razor + unique peptides mock_1	Razor + unique peptides mock_2	Razor + unique peptides mock_3	Razor + unique peptides WT_1-1	Razor + unique peptides WT_1-2
A0A024R571;Q9H4M9;C9JC03;C9J2Z4;C9JDQ8;C9JIJ3;C9IZH1	A0A024R571;Q9H4M9;C9JC03;C9J2Z4	17;17;14;13;8;3;3	15;15;12;11;6;3;3	9;9;6;7;3;1;1	EH domain-containing protein 1	EHD1	tr|A0A024R571|A0A024R571_HUMAN EH domain-containing protein 1 OS=Homo sapiens OX=9606 GN=EHD1 PE=1 SV=1;sp|Q9H4M9|EHD1_HUMAN EH domain-containing protein 1 OS=Homo sapiens OX=9606 GN=EHD1 PE=1 SV=2;tr|C9JC03|C9JC03_HUMAN EH domain-containing protein 1 (Fra	8	2	0	7	17	15	9	3	3	1	0	0	0	0	0	0	0	0	0	4	9	11	6	6	5	1	3	2	3	3	1	0	0	0	0	0	0	0	0	0	3	8
A0A087WTT1;P11940;E7EQV3;E7ERJ7;H0YAR2;E5RGH3;E5RJB9;Q9H361;H0YBN4;E5RH24;H0YB86;E5RHG7;H0YEQ8;H0YAP2;Q4VXU2;E5RGC4;E5RFD8;A0A6I8PS38;A0A6I8PLA1;Q5JQF8	A0A087WTT1;P11940;E7EQV3;E7ERJ7;H0YAR2	13;13;12;11;7;6;6;6;5;4;4;3;3;3;2;1;1;1;1;1	13;13;12;11;7;6;6;6;5;4;4;3;3;3;2;1;1;1;1;1	6;6;5;6;5;1;1;4;2;1;2;1;0;3;1;1;1;0;0;1	Polyadenylate-binding protein;Polyadenylate-binding protein 1	PABPC1	tr|A0A087WTT1|A0A087WTT1_HUMAN Polyadenylate-binding protein OS=Homo sapiens OX=9606 GN=PABPC1 PE=1 SV=1;sp|P11940|PABP1_HUMAN Polyadenylate-binding protein 1 OS=Homo sapiens OX=9606 GN=PABPC1 PE=1 SV=2;tr|E7EQV3|E7EQV3_HUMAN Polyadenylate-binding protein	9	5	0	20	13	13	6	8	9	3	1	3	2	1	0	0	0	0	0	7	7	8	6	5	5	5	5	3	8	9	3	1	3	2	1	0	0	0	0	0	7	7
A0A087WVF7;Q9NZM3;E7EPJ2;H7BZD4	A0A087WVF7;Q9NZM3	22;22;8;1	20;20;8;1	20;20;8;1	Intersectin-2	ITSN2	tr|A0A087WVF7|A0A087WVF7_HUMAN Intersectin-2 OS=Homo sapiens OX=9606 GN=ITSN2 PE=1 SV=1;sp|Q9NZM3|ITSN2_HUMAN Intersectin-2 OS=Homo sapiens OX=9606 GN=ITSN2 PE=1 SV=3	8	4	0	4	22	20	20	6	4	4	1	1	1	2	1	0	0	0	0	9	9	10	9	6	4	6	6	3	6	4	4	1	1	1	2	1	0	0	0	0	8	7
A0A087WVQ6;Q00610;J3KS13;A0A087WX41;P53675;K7EJJ5;J3KSQ2;J3QL20;F5H5N6	A0A087WVQ6;Q00610	28;28;10;5;5;3;2;1;1	28;28;10;5;5;3;2;1;1	28;28;10;5;5;3;2;1;1	Clathrin heavy chain;Clathrin heavy chain 1	CLTC	tr|A0A087WVQ6|A0A087WVQ6_HUMAN Clathrin heavy chain OS=Homo sapiens OX=9606 GN=CLTC PE=1 SV=1;sp|Q00610|CLH1_HUMAN Clathrin heavy chain 1 OS=Homo sapiens OX=9606 GN=CLTC PE=1 SV=5	9	7	3	9	28	28	28	9	8	3	5	5	7	5	0	0	3	3	10	7	8	15	9	4	3	5	5	3	9	8	3	5	5	7	5	0	0	3	3	10	7	8
A0A087WY55;Q9NP79;Q5TGM0	A0A087WY55;Q9NP79;Q5TGM0	7;7;4	7;7;4	7;7;4	Vacuolar protein sorting-associated protein VTA1 homolog	VTA1	tr|A0A087WY55|A0A087WY55_HUMAN Chromosome 6 open reading frame 55, isoform CRA_b OS=Homo sapiens OX=9606 GN=VTA1 PE=1 SV=1;sp|Q9NP79|VTA1_HUMAN Vacuolar protein sorting-associated protein VTA1 homolog OS=Homo sapiens OX=9606 GN=VTA1 PE=1 SV=1;tr|Q5TGM0|Q5T	9	6	0	3	7	7	7	3	4	3	1	2	2	2	0	0	0	0	1	5	5	5	3	3	3	4	3	2	3	4	3	1	2	2	2	0	0	0	0	1	5	5
A0A087WY71;E9PFW3;Q96CW1;C9JJ47;C9JTK4;C9JGT8;C9JJD3;C9JPV8;H7C4C3	A0A087WY71;E9PFW3;Q96CW1;C9JJ47	11;11;11;8;4;4;3;3;1	11;11;11;8;4;4;3;3;1	11;11;11;8;4;4;3;3;1	AP-2 complex subunit mu	AP2M1	tr|A0A087WY71|A0A087WY71_HUMAN AP-2 complex subunit mu OS=Homo sapiens OX=9606 GN=AP2M1 PE=1 SV=1;tr|E9PFW3|E9PFW3_HUMAN AP-2 complex subunit mu OS=Homo sapiens OX=9606 GN=AP2M1 PE=1 SV=1;sp|Q96CW1|AP2M1_HUMAN AP-2 complex subunit mu OS=Homo sapiens OX=960	8	3	0	9	11	11	11	6	5	1	2	1	2	1	0	0	0	0	0	2	3	5	4	3	3	3	3	1	6	5	1	2	1	2	1	0	0	0	0	0	2	3
A0A0G2JIW1;P0DMV9;P0DMV8;V9GZ37	A0A0G2JIW1;P0DMV9;P0DMV8;V9GZ37	44;44;44;28	44;44;44;28	27;27;27;17	Heat shock 70 kDa protein 1B;Heat shock 70 kDa protein 1A	HSPA1B;HSPA1A	tr|A0A0G2JIW1|A0A0G2JIW1_HUMAN Heat shock 70 kDa protein 1B OS=Homo sapiens OX=9606 GN=HSPA1B PE=1 SV=1;sp|P0DMV9|HS71B_HUMAN Heat shock 70 kDa protein 1B OS=Homo sapiens OX=9606 GN=HSPA1B PE=1 SV=1;sp|P0DMV8|HS71A_HUMAN Heat shock 70 kDa protein 1A OS=Hom	9	7	3	4	44	44	27	26	31	26	12	22	16	9	1	1	8	7	11	18	23	24	18	19	18	18	19	17	26	31	26	12	22	16	9	1	1	8	7	11	18	23
A0A0U1RR32;A0A0U1RRH7;Q99878;Q96KK5;Q9BTM1;Q16777;Q6FI13;P20671;P0C0S8;H0YFX9;A0A3B3IS11;Q96QV6;P16104;C9J0D1;A0A494C189;Q71UI9;P0C0S5;C9J386;Q8IUE6	A0A0U1RR32;A0A0U1RRH7;Q99878;Q96KK5;Q9BTM1;Q16777;Q6FI13;P20671;P0C0S8;H0YFX9;A0A3B3IS11;Q96QV6;P16104	5;5;5;5;5;5;5;5;5;4;3;3;3;2;2;2;2;1;1	5;5;5;5;5;5;5;5;5;4;3;3;3;2;2;2;2;1;1	1;1;1;1;1;1;1;1;1;1;0;0;0;0;0;0;0;0;0	Histone H2A type 1-J;Histone H2A type 1-H;Histone H2A.J;Histone H2A type 2-C;Histone H2A type 2-A;Histone H2A type 1-D;Histone H2A type 1;Histone H2A;Histone H2A type 1-A;Histone H2AX	HIST1H2AJ;HIST1H2AH;H2AFJ;HIST2H2AC;HIST2H2AA3;HIST1H2AD;HIST1H2AG;HIST1H2AA;H2AFX	tr|A0A0U1RR32|A0A0U1RR32_HUMAN Histone H2A OS=Homo sapiens OX=9606 GN=hCG_2039566 PE=3 SV=1;tr|A0A0U1RRH7|A0A0U1RRH7_HUMAN Histone H2A OS=Homo sapiens OX=9606 PE=3 SV=1;sp|Q99878|H2A1J_HUMAN Histone H2A type 1-J OS=Homo sapiens OX=9606 GN=H2AC14 PE=1 SV=3;	2	4	0	19	5	5	1	2	2	1	0	2	0	2	1	2	3	2	3	0	1	2	0	0	0	1	2	1	2	2	1	0	2	0	2	1	2	3	2	3	0	1
A0A140T955;A0A140T933;A0A1W2PPQ2;A0A1W2PRT9;Q53Z42;A0A140T9I0;A0A140T9X5;A0A140T913	A0A140T955;A0A140T933;A0A1W2PPQ2;A0A1W2PRT9;Q53Z42;A0A140T9I0;A0A140T9X5;A0A140T913	4;4;4;4;4;4;4;4	4;4;4;4;4;4;4;4	1;1;1;1;1;1;1;1		HLA-A	tr|A0A140T955|A0A140T955_HUMAN HLA class I histocompatibility antigen, A alpha chain OS=Homo sapiens OX=9606 GN=HLA-A PE=1 SV=1;tr|A0A140T933|A0A140T933_HUMAN HLA class I histocompatibility antigen, A alpha chain (Fragment) OS=Homo sapiens OX=9606 GN=HLA-A	1	5	0	8	4	4	1	3	3	1	2	2	1	2	0	0	0	0	0	1	1	2	1	2	2	0	2	0	3	3	1	2	2	1	2	0	0	0	0	0	1	1
A6NNI4;A0A2R8Y478;G8JLH6;P21926;A0A087WU13	A6NNI4;A0A2R8Y478;G8JLH6;P21926	4;4;4;4;1	4;4;4;4;1	4;4;4;4;1	Tetraspanin;CD9 antigen	CD9	tr|A6NNI4|A6NNI4_HUMAN Tetraspanin OS=Homo sapiens OX=9606 GN=CD9 PE=1 SV=1;tr|A0A2R8Y478|A0A2R8Y478_HUMAN Tetraspanin OS=Homo sapiens OX=9606 GN=CD9 PE=1 SV=1;tr|G8JLH6|G8JLH6_HUMAN Tetraspanin OS=Homo sapiens OX=9606 GN=CD9 PE=1 SV=2;sp|P21926|CD9_HUMAN	6	1	0	5	4	4	4	1	2	1	0	0	0	0	0	0	1	0	0	2	3	2	2	2	2	2	3	2	1	2	1	0	0	0	0	0	0	1	0	0	2	3
C9J0A7;Q9UQN3;A0A087WW88	C9J0A7;Q9UQN3	7;7;1	7;7;1	7;7;1	Charged multivesicular body protein 2b	CHMP2B	tr|C9J0A7|C9J0A7_HUMAN Charged multivesicular body protein 2b OS=Homo sapiens OX=9606 GN=CHMP2B PE=1 SV=1;sp|Q9UQN3|CHM2B_HUMAN Charged multivesicular body protein 2b OS=Homo sapiens OX=9606 GN=CHMP2B PE=1 SV=1	4	3	0	3	7	7	7	5	4	2	1	2	0	0	0	0	0	0	0	2	2	2	2	2	2	1	2	1	5	4	2	1	2	0	0	0	0	0	0	0	2	2
E9PC69;Q7KZI7;E7ETY4;B4DIB3;A0A087X0I6;Q9P0L2;F5H4F6;P27448;F5H6N2;H0YNV4;J3KNR0;K7EK17;K7EKG8;F5H4J8;H0YKJ3;H0YIY6;Q96L34	E9PC69;Q7KZI7;E7ETY4	21;19;16;4;4;4;3;3;2;2;2;1;1;1;1;1;1	21;19;16;4;4;4;3;3;2;2;2;1;1;1;1;1;1	21;19;16;4;4;4;3;3;2;2;2;1;1;1;1;1;1	Serine/threonine-protein kinase MARK2	MARK2	tr|E9PC69|E9PC69_HUMAN Non-specific serine/threonine protein kinase OS=Homo sapiens OX=9606 GN=MARK2 PE=1 SV=3;sp|Q7KZI7|MARK2_HUMAN Serine/threonine-protein kinase MARK2 OS=Homo sapiens OX=9606 GN=MARK2 PE=1 SV=2;tr|E7ETY4|E7ETY4_HUMAN Non-specific serine	9	2	0	17	21	21	21	2	3	2	2	2	0	0	0	0	0	0	0	8	17	14	10	10	6	7	8	4	2	3	2	2	2	0	0	0	0	0	0	0	8	17
E9PJK1;E9PRJ8;H0YDL9;H0YDJ9;E9PIF1;A6NMH8;P60033;E9PM31;H0YEE2	E9PJK1;E9PRJ8;H0YDL9;H0YDJ9;E9PIF1;A6NMH8;P60033	5;5;5;5;5;5;5;2;2	5;5;5;5;5;5;5;2;2	5;5;5;5;5;5;5;2;2	Tetraspanin;CD81 antigen	CD81	tr|E9PJK1|E9PJK1_HUMAN Tetraspanin OS=Homo sapiens OX=9606 GN=CD81 PE=1 SV=1;tr|E9PRJ8|E9PRJ8_HUMAN Tetraspanin (Fragment) OS=Homo sapiens OX=9606 GN=CD81 PE=1 SV=1;tr|H0YDL9|H0YDL9_HUMAN Tetraspanin (Fragment) OS=Homo sapiens OX=9606 GN=CD81 PE=1 SV=1;tr|	9	7	0	9	5	5	5	4	3	3	1	3	2	2	0	0	1	0	1	4	4	4	4	3	4	3	4	3	4	3	3	1	3	2	2	0	0	1	0	1	4	4
E9PP50;P23528;G3V1A4;E9PK25;E9PS23;E9PQB7;E9PLJ3;Q9Y281	E9PP50;P23528;G3V1A4;E9PK25;E9PS23;E9PQB7	6;6;4;4;3;3;2;2	6;6;4;4;3;3;2;2	6;6;4;4;3;3;2;2	Cofilin-1	CFL1	tr|E9PP50|E9PP50_HUMAN Cofilin, non-muscle isoform (Fragment) OS=Homo sapiens OX=9606 GN=CFL1 PE=1 SV=8;sp|P23528|COF1_HUMAN Cofilin-1 OS=Homo sapiens OX=9606 GN=CFL1 PE=1 SV=3;tr|G3V1A4|G3V1A4_HUMAN Cofilin, non-muscle isoform OS=Homo sapiens OX=9606 GN=C	7	4	2	8	6	6	6	2	4	1	2	1	2	1	0	0	2	2	1	3	5	2	2	2	2	2	0	2	2	4	1	2	1	2	1	0	0	2	2	1	3	5
F5GZS6;J3KPF3;P08195;F5H0E2;H0YFS2;F5H867;F5GZI0;F5GZR9;H0YFX4	F5GZS6;J3KPF3;P08195	17;17;17;6;6;4;4;2;2	17;17;17;6;6;4;4;2;2	17;17;17;6;6;4;4;2;2	4F2 cell-surface antigen heavy chain	SLC3A2	tr|F5GZS6|F5GZS6_HUMAN 4F2 cell-surface antigen heavy chain OS=Homo sapiens OX=9606 GN=SLC3A2 PE=1 SV=1;tr|J3KPF3|J3KPF3_HUMAN 4F2 cell-surface antigen heavy chain OS=Homo sapiens OX=9606 GN=SLC3A2 PE=1 SV=1;sp|P08195|4F2_HUMAN 4F2 cell-surface antigen hea	9	6	1	9	17	17	17	6	8	2	2	4	3	1	0	0	1	1	5	7	8	11	9	9	5	7	7	4	6	8	2	2	4	3	1	0	0	1	1	5	7	8
F8VXH9;H3BRU6;F8VZX2;Q15366;F8W0G4;F8W1G6;J3QT27;E9PFP8;P57721;H3BND9;F8VTZ0;F8VRH0	F8VXH9;H3BRU6;F8VZX2;Q15366;F8W0G4;F8W1G6;J3QT27;E9PFP8;P57721	6;6;6;6;5;4;3;3;3;2;1;1	6;6;6;6;5;4;3;3;3;2;1;1	4;4;4;4;3;3;1;1;1;2;0;1	Poly(rC)-binding protein 2;Poly(rC)-binding protein 3	PCBP2;PCBP3	tr|F8VXH9|F8VXH9_HUMAN Poly(rC)-binding protein 2 (Fragment) OS=Homo sapiens OX=9606 GN=PCBP2 PE=1 SV=1;tr|H3BRU6|H3BRU6_HUMAN Poly(rC)-binding protein 2 (Fragment) OS=Homo sapiens OX=9606 GN=PCBP2 PE=1 SV=1;tr|F8VZX2|F8VZX2_HUMAN Poly(rC)-binding protein	9	5	0	12	6	6	4	4	3	2	2	2	1	1	0	0	0	0	0	5	4	4	3	3	3	3	2	3	4	3	2	2	2	1	1	0	0	0	0	0	5	4
H3BMH2;H3BSC1;P62491;Q15907;B4DQU5	H3BMH2;H3BSC1;P62491;Q15907	5;5;5;5;2	5;5;5;5;2	5;5;5;5;2	Ras-related protein Rab-11A;Ras-related protein Rab-11B	RAB11A;RAB11B	tr|H3BMH2|H3BMH2_HUMAN Ras-related protein Rab-11A (Fragment) OS=Homo sapiens OX=9606 GN=RAB11A PE=4 SV=1;tr|H3BSC1|H3BSC1_HUMAN Ras-related protein Rab-11A OS=Homo sapiens OX=9606 GN=RAB11A PE=1 SV=1;sp|P62491|RB11A_HUMAN Ras-related protein Rab-11A OS=Ho	8	2	0	5	5	5	5	2	0	1	1	0	1	3	0	0	0	0	1	3	4	4	4	4	3	3	2	1	2	0	1	1	0	1	3	0	0	0	0	1	3	4
H3BMU1;H3BUI0;P53990;H3BQF7;J3KR23;F5GXM3;H3BPP6;H3BRE2	H3BMU1;H3BUI0;P53990;H3BQF7;J3KR23;F5GXM3	10;10;10;9;7;5;3;3	10;10;10;9;7;5;3;3	10;10;10;9;7;5;3;3	IST1 homolog	IST1	tr|H3BMU1|H3BMU1_HUMAN IST1 homolog (Fragment) OS=Homo sapiens OX=9606 GN=IST1 PE=1 SV=1;tr|H3BUI0|H3BUI0_HUMAN IST1 homolog (Fragment) OS=Homo sapiens OX=9606 GN=IST1 PE=1 SV=1;sp|P53990|IST1_HUMAN IST1 homolog OS=Homo sapiens OX=9606 GN=IST1 PE=1 SV=1;tr	2	5	0	8	10	10	10	6	7	2	2	3	0	2	0	0	0	0	1	2	2	2	1	2	1	2	1	1	6	7	2	2	3	0	2	0	0	0	0	1	2	2
J3QS39;J3QTR3;F5H6Q2;F5GYU3;F5H2Z3;F5H265;B4DV12;F5H388;F5H747;F5GXK7;J3QKN0;Q5PY61;Q96C32;P62987;P62979;P0CG47;P0CG48;M0R1V7;Q49A90;M0R1M6;M0R2S1;A0A2R8Y422;F5GZ39;J3QSA3	J3QS39;J3QTR3;F5H6Q2;F5GYU3;F5H2Z3;F5H265;B4DV12;F5H388;F5H747;F5GXK7;J3QKN0;Q5PY61;Q96C32;P62987;P62979;P0CG47;P0CG48;M0R1V7;Q49A90;M0R1M6;M0R2S1;A0A2R8Y422;F5GZ39;J3QSA3	13;13;13;13;13;13;13;13;13;13;13;13;13;13;13;13;13;10;10;9;9;9;8;7	13;13;13;13;13;13;13;13;13;13;13;13;13;13;13;13;13;10;10;9;9;9;8;7	13;13;13;13;13;13;13;13;13;13;13;13;13;13;13;13;13;10;10;9;9;9;8;7	Ubiquitin-60S ribosomal protein L40;Ubiquitin;60S ribosomal protein L40;Ubiquitin-40S ribosomal protein S27a;Ubiquitin;40S ribosomal protein S27a;Polyubiquitin-B;Ubiquitin;Polyubiquitin-C;Ubiquitin	UBB;RPS27A;UBC;UBA52	tr|J3QS39|J3QS39_HUMAN Polyubiquitin-B (Fragment) OS=Homo sapiens OX=9606 GN=UBB PE=1 SV=1;tr|J3QTR3|J3QTR3_HUMAN Ubiquitin-40S ribosomal protein S27a (Fragment) OS=Homo sapiens OX=9606 GN=RPS27A PE=1 SV=1;tr|F5H6Q2|F5H6Q2_HUMAN Polyubiquitin-C (Fragment)	9	8	3	24	13	13	13	9	8	7	5	11	8	9	1	2	3	3	2	7	7	5	3	5	6	6	5	6	9	8	7	5	11	8	9	1	2	3	3	2	7	7
K7EMV3;A0A590UJJ6;B4DEB1;K7EK07;K7ES00;Q71DI3;Q16695;P84243;P68431;K7EP01;Q6NXT2	K7EMV3;A0A590UJJ6;B4DEB1;K7EK07;K7ES00;Q71DI3;Q16695;P84243;P68431;K7EP01;Q6NXT2	3;3;3;3;3;3;3;3;3;2;2	3;3;3;3;3;3;3;3;3;2;2	1;1;1;1;1;1;1;1;1;0;0	Histone H3;Histone H3.2;Histone H3.1t;Histone H3.3;Histone H3.1;Histone H3.3C	H3F3B;H3F3A;HIST2H3A;HIST3H3;HIST1H3A;H3F3C	tr|K7EMV3|K7EMV3_HUMAN Histone H3 OS=Homo sapiens OX=9606 GN=H3-3B PE=1 SV=1;tr|A0A590UJJ6|A0A590UJJ6_HUMAN Histone H3 OS=Homo sapiens OX=9606 GN=H3-3A PE=1 SV=1;tr|B4DEB1|B4DEB1_HUMAN Histone H3 OS=Homo sapiens OX=9606 GN=H3-3A PE=1 SV=1;tr|K7EK07|K7EK07_	1	3	3	11	3	3	1	1	2	1	2	2	1	1	1	0	3	2	3	0	0	0	1	0	0	1	2	1	1	2	1	2	2	1	1	1	0	3	2	3	0	0
O00560;B4DHN5;E9PBU7	O00560;B4DHN5;E9PBU7	16;9;9	16;9;9	3;2;2	Syntenin-1	SDCBP	sp|O00560|SDCB1_HUMAN Syntenin-1 OS=Homo sapiens OX=9606 GN=SDCBP PE=1 SV=1;tr|B4DHN5|B4DHN5_HUMAN Syntenin-1 OS=Homo sapiens OX=9606 GN=SDCBP PE=1 SV=1;tr|E9PBU7|E9PBU7_HUMAN Syntenin-1 OS=Homo sapiens OX=9606 GN=SDCBP PE=1 SV=1	9	7	3	3	16	16	3	6	6	3	3	3	2	3	1	0	4	3	4	7	7	8	6	5	5	6	8	7	6	6	3	3	3	2	3	1	0	4	3	4	7	7
O14965;A3KFJ0;Q5QPD4;A3KFJ1;Q5QPD2;Q5QPD1;A3KFJ2;B4DXA6;A0A0A0MSY3;Q5Y191;Q9UQB9	O14965;A3KFJ0;Q5QPD4	19;15;11;8;7;4;3;1;1;1;1	19;15;11;8;7;4;3;1;1;1;1	18;14;10;7;7;4;3;0;0;0;0	Aurora kinase A	AURKA	sp|O14965|AURKA_HUMAN Aurora kinase A OS=Homo sapiens OX=9606 GN=AURKA PE=1 SV=2;tr|A3KFJ0|A3KFJ0_HUMAN Non-specific serine/threonine protein kinase OS=Homo sapiens OX=9606 GN=AURKA PE=1 SV=1;tr|Q5QPD4|Q5QPD4_HUMAN Non-specific serine/threonine protein kin	9	7	0	11	19	19	18	8	5	6	2	4	2	5	0	0	0	0	0	13	14	14	10	12	8	11	9	7	8	5	6	2	4	2	5	0	0	0	0	0	13	14
O43633;M0R1L7;M0R1T5;M0QXX8	O43633;M0R1L7;M0R1T5	11;7;7;4	11;7;7;4	11;7;7;4	Charged multivesicular body protein 2a	CHMP2A	sp|O43633|CHM2A_HUMAN Charged multivesicular body protein 2a OS=Homo sapiens OX=9606 GN=CHMP2A PE=1 SV=1;tr|M0R1L7|M0R1L7_HUMAN Charged multivesicular body protein 2a (Fragment) OS=Homo sapiens OX=9606 GN=CHMP2A PE=1 SV=1;tr|M0R1T5|M0R1T5_HUMAN Charged mul	7	5	0	4	11	11	11	3	6	5	1	6	3	0	0	0	0	0	0	2	4	5	2	1	2	2	1	2	3	6	5	1	6	3	0	0	0	0	0	0	2	4
O75351;K7EL71;K7EKZ3;Q6PIW4	O75351	17;1;1;1	17;1;1;1	14;1;1;0	Vacuolar protein sorting-associated protein 4B	VPS4B	sp|O75351|VPS4B_HUMAN Vacuolar protein sorting-associated protein 4B OS=Homo sapiens OX=9606 GN=VPS4B PE=1 SV=2	9	6	0	4	17	17	14	8	11	5	1	3	4	2	0	0	0	0	1	5	8	9	7	5	3	2	7	3	8	11	5	1	3	4	2	0	0	0	0	1	5	8
O94973;A0A0G2JS82;E9PR62;A0A0G2JRF9;A0A0G2JQA4;A0A0G2JRS3;M0R2D9;E9PNC4	O94973;A0A0G2JS82	29;27;11;9;9;5;4;4	17;17;6;6;6;4;0;3	5;5;1;1;1;1;0;1	AP-2 complex subunit alpha-2	AP2A2	sp|O94973|AP2A2_HUMAN AP-2 complex subunit alpha-2 OS=Homo sapiens OX=9606 GN=AP2A2 PE=1 SV=2;tr|A0A0G2JS82|A0A0G2JS82_HUMAN AP-2 complex subunit alpha-2 (Fragment) OS=Homo sapiens OX=9606 GN=AP2A2 PE=1 SV=1	9	3	0	8	29	17	5	11	11	4	2	4	0	2	1	0	0	0	0	8	12	16	9	8	8	8	5	6	4	5	1	0	2	0	0	0	0	0	0	0	4	6
O95630;C9JK83;C9JEK5;F5H5B9;C9JZ93	O95630;C9JK83	8;5;2;2;1	8;5;2;2;1	8;5;2;2;1	STAM-binding protein	STAMBP	sp|O95630|STABP_HUMAN STAM-binding protein OS=Homo sapiens OX=9606 GN=STAMBP PE=1 SV=1;tr|C9JK83|C9JK83_HUMAN STAM-binding protein (Fragment) OS=Homo sapiens OX=9606 GN=STAMBP PE=1 SV=1	3	2	0	5	8	8	8	5	2	1	2	1	2	0	0	0	0	0	0	0	2	3	2	0	1	0	1	0	5	2	1	2	1	2	0	0	0	0	0	0	0	2
O95782	O95782	34	34	22	AP-2 complex subunit alpha-1	AP2A1	sp|O95782|AP2A1_HUMAN AP-2 complex subunit alpha-1 OS=Homo sapiens OX=9606 GN=AP2A1 PE=1 SV=3	9	6	0	1	34	34	22	13	12	7	3	4	2	3	1	0	0	0	0	13	18	20	15	13	12	10	8	10	13	12	7	3	4	2	3	1	0	0	0	0	13	18
P00742	P00742	4	4	4	Coagulation factor X;Factor X light chain;Factor X heavy chain;Activated factor Xa heavy chain	F10	sp|P00742|FA10_HUMAN Coagulation factor X OS=Homo sapiens OX=9606 GN=F10 PE=1 SV=2	8	4	1	1	4	4	4	1	2	2	2	2	0	2	1	1	1	0	3	3	4	3	3	2	2	1	2	3	1	2	2	2	2	0	2	1	1	1	0	3	3	4
P01111;G3V4K2;G3V5T7	P01111	6;2;2	6;2;2	2;0;0	GTPase NRas	NRAS	sp|P01111|RASN_HUMAN GTPase NRas OS=Homo sapiens OX=9606 GN=NRAS PE=1 SV=1	7	1	0	3	6	6	2	3	1	2	0	2	1	1	0	0	0	0	0	5	4	4	2	1	2	4	4	1	3	1	2	0	2	1	1	0	0	0	0	0	5	4
P02786;G3V0E5;F8WBE5;H7C3V5	P02786;G3V0E5	9;7;2;1	9;7;2;1	9;7;2;1	Transferrin receptor protein 1;Transferrin receptor protein 1, serum form	TFRC	sp|P02786|TFR1_HUMAN Transferrin receptor protein 1 OS=Homo sapiens OX=9606 GN=TFRC PE=1 SV=2;tr|G3V0E5|G3V0E5_HUMAN Transferrin receptor protein 1 OS=Homo sapiens OX=9606 GN=TFRC PE=1 SV=1	7	7	1	4	9	9	9	4	2	2	2	3	3	4	0	0	1	1	3	3	5	3	4	4	3	3	1	1	4	2	2	2	3	3	4	0	0	1	1	3	3	5
P04406;E7EUT5	P04406;E7EUT5	6;5	6;5	6;5	Glyceraldehyde-3-phosphate dehydrogenase	GAPDH	sp|P04406|G3P_HUMAN Glyceraldehyde-3-phosphate dehydrogenase OS=Homo sapiens OX=9606 GN=GAPDH PE=1 SV=3;tr|E7EUT5|E7EUT5_HUMAN Glyceraldehyde-3-phosphate dehydrogenase OS=Homo sapiens OX=9606 GN=GAPDH PE=1 SV=1	7	5	2	2	6	6	6	3	2	2	3	2	0	1	0	0	2	1	3	2	2	4	5	3	2	3	2	2	3	2	2	3	2	0	1	0	0	2	1	3	2	2
P05023;M0R116;A0A2R8YEY8;A0A0A0MT26;P13637;B1AKY9;P50993;H0Y7C1;Q13733;Q5TC01;E9PRA5;Q5TC02;A0A669K9X0;M0QXF2;P20648;P54707	P05023	29;12;12;12;12;10;10;8;6;4;4;3;3;2;2;2	29;12;12;12;12;10;10;8;6;4;4;3;3;2;2;2	29;12;12;12;12;10;10;8;6;4;4;3;3;2;2;2	Sodium/potassium-transporting ATPase subunit alpha-1	ATP1A1	sp|P05023|AT1A1_HUMAN Sodium/potassium-transporting ATPase subunit alpha-1 OS=Homo sapiens OX=9606 GN=ATP1A1 PE=1 SV=1	9	7	3	16	29	29	29	10	14	11	10	11	11	8	0	1	7	7	8	9	10	16	13	12	9	12	9	4	10	14	11	10	11	11	8	0	1	7	7	8	9	10
P05556;C9JPK5;Q5T3E6;E9PLR6;E7EUI6;E7EQW5;H7C4N8;E7ERX5	P05556	11;2;2;2;2;2;1;1	11;2;2;2;2;2;1;1	11;2;2;2;2;2;1;1	Integrin beta-1	ITGB1	sp|P05556|ITB1_HUMAN Integrin beta-1 OS=Homo sapiens OX=9606 GN=ITGB1 PE=1 SV=2	4	4	0	8	11	11	11	6	3	1	2	1	1	3	0	0	0	0	0	1	3	7	4	3	1	1	1	1	6	3	1	2	1	1	3	0	0	0	0	0	1	3
P06733;A0A2R8Y6G6;K7ERS8;A0A2R8Y879;A0A2R8YEM5;K7EM90;A0A2R8Y798;A0A2R8YEG5;A0A2R8Y6I8;F5H1C3;E5RI09;E5RG95;K7EPM1;K7EKN2;E5RGZ4;F5H0C8;P13929;P09104	P06733;A0A2R8Y6G6	12;11;5;5;5;5;4;4;1;1;1;1;1;1;1;1;1;1	12;11;5;5;5;5;4;4;1;1;1;1;1;1;1;1;1;1	12;11;5;5;5;5;4;4;1;1;1;1;1;1;1;1;1;1	Alpha-enolase	ENO1	sp|P06733|ENOA_HUMAN Alpha-enolase OS=Homo sapiens OX=9606 GN=ENO1 PE=1 SV=2;tr|A0A2R8Y6G6|A0A2R8Y6G6_HUMAN 2-phospho-D-glycerate hydro-lyase OS=Homo sapiens OX=9606 GN=ENO1 PE=1 SV=1	6	4	1	18	12	12	12	4	5	3	4	3	0	2	0	0	0	2	2	1	3	4	2	2	2	2	1	1	4	5	3	4	3	0	2	0	0	0	2	2	1	3
P07567	P07567	62	5	5			sp|P07567|GAG_MPMV Gag polyprotein OS=Mason-Pfizer monkey virus OX=11855 GN=gag PE=1 SV=3	9	3	0	1	62	5	5	36	35	31	17	23	18	22	3	0	9	5	0	35	39	37	35	32	35	31	31	27	3	1	1	1	0	0	3	0	0	0	0	0	3	4
P07572;E9PGM3	P07572;E9PGM3	109;72	109;72	52;16		DEPDC4	sp|P07572|POL_MPMV Gag-Pro-Pol polyprotein OS=Mason-Pfizer monkey virus OX=11855 GN=gag-pro-pol PE=1 SV=2;tr|E9PGM3|E9PGM3_HUMAN DEP domain-containing protein 4 (Fragment) OS=Homo sapiens OX=9606 GN=DEPDC4 PE=4 SV=2	9	8	2	2	109	109	52	56	58	42	22	37	23	26	4	1	9	5	0	66	77	76	67	61	66	56	59	48	56	58	42	22	37	23	26	4	1	9	5	0	66	77
P07900;G3V2J8;Q14568;Q58FF6;Q58FG0	P07900	17;6;3;2;1	9;2;1;0;1	9;2;1;0;1	Heat shock protein HSP 90-alpha	HSP90AA1	sp|P07900|HS90A_HUMAN Heat shock protein HSP 90-alpha OS=Homo sapiens OX=9606 GN=HSP90AA1 PE=1 SV=5	5	4	0	5	17	9	9	4	5	4	3	5	4	3	0	0	3	1	2	5	8	10	6	5	6	7	3	5	2	1	3	1	2	2	2	0	0	0	0	1	3	3
P08238;Q58FF7;F8W026;Q96GW1;A0A1W2PRR1	P08238	21;8;1;1;1	21;8;1;1;1	12;4;0;0;0	Heat shock protein HSP 90-beta	HSP90AB1	sp|P08238|HS90B_HUMAN Heat shock protein HSP 90-beta OS=Homo sapiens OX=9606 GN=HSP90AB1 PE=1 SV=4	9	7	2	5	21	21	12	9	8	4	3	8	4	3	0	0	4	1	6	7	13	15	11	12	8	9	6	6	9	8	4	3	8	4	3	0	0	4	1	6	7	13
P08758;E9PHT9;D6RBE9;D6RCN3	P08758;E9PHT9;D6RBE9	9;5;5;1	9;5;5;1	3;3;1;1	Annexin A5;Annexin	ANXA5	sp|P08758|ANXA5_HUMAN Annexin A5 OS=Homo sapiens OX=9606 GN=ANXA5 PE=1 SV=2;tr|E9PHT9|E9PHT9_HUMAN Annexin OS=Homo sapiens OX=9606 GN=ANXA5 PE=1 SV=1;tr|D6RBE9|D6RBE9_HUMAN Annexin OS=Homo sapiens OX=9606 GN=ANXA5 PE=1 SV=1	2	2	0	4	9	9	3	3	3	1	1	1	0	0	0	0	0	1	6	0	2	3	1	0	0	1	0	1	3	3	1	1	1	0	0	0	0	0	1	6	0	2
P09543;K7ERC4	P09543	49;20	49;20	32;5	2,3-cyclic-nucleotide 3-phosphodiesterase	CNP	sp|P09543|CN37_HUMAN 2,3-cyclic-nucleotide 3-phosphodiesterase OS=Homo sapiens OX=9606 GN=CNP PE=1 SV=2	9	9	0	2	49	49	32	30	26	21	19	23	16	13	3	4	0	0	0	17	23	21	18	15	16	17	19	14	30	26	21	19	23	16	13	3	4	0	0	0	17	23
P09874;Q5VX84;Q5VX85	P09874	16;1;1	16;1;1	16;1;1	Poly [ADP-ribose] polymerase 1	PARP1	sp|P09874|PARP1_HUMAN Poly [ADP-ribose] polymerase 1 OS=Homo sapiens OX=9606 GN=PARP1 PE=1 SV=4	1	4	2	3	16	16	16	3	2	1	1	2	0	2	0	0	5	0	14	1	1	3	0	0	1	1	1	0	3	2	1	1	2	0	2	0	0	5	0	14	1	1
P11142;E9PKE3;E9PNE6;A8K7Q2;E9PLF4;E9PQQ4;E9PQK7;E9PK54;E9PPY6;E9PI65;P54652;E9PN25;E9PS65;E9PM13	P11142;E9PKE3;E9PNE6;A8K7Q2	44;42;31;24;17;16;16;16;13;13;12;11;10;7	41;39;28;23;15;14;14;14;11;11;9;9;9;6	15;15;15;11;4;4;4;4;4;2;0;4;9;6	Heat shock cognate 71 kDa protein	HSPA8	sp|P11142|HSP7C_HUMAN Heat shock cognate 71 kDa protein OS=Homo sapiens OX=9606 GN=HSPA8 PE=1 SV=1;tr|E9PKE3|E9PKE3_HUMAN Heat shock cognate 71 kDa protein OS=Homo sapiens OX=9606 GN=HSPA8 PE=1 SV=1;tr|E9PNE6|E9PNE6_HUMAN Heat shock cognate 71 kDa protein	9	7	3	14	44	41	15	25	27	26	18	22	14	15	0	2	8	8	15	22	23	26	22	24	23	20	19	17	24	26	24	18	20	13	14	0	1	7	7	14	21	22
P26038;V9GZ54	P26038	10;3	10;3	6;2	Moesin	MSN	sp|P26038|MOES_HUMAN Moesin OS=Homo sapiens OX=9606 GN=MSN PE=1 SV=3	5	4	1	2	10	10	6	3	6	1	1	2	2	1	0	0	1	2	4	1	2	2	2	2	1	2	1	1	3	6	1	1	2	2	1	0	0	1	2	4	1	2
P27105;F8VSL7	P27105;F8VSL7	7;4	7;4	7;4	Erythrocyte band 7 integral membrane protein	STOM	sp|P27105|STOM_HUMAN Erythrocyte band 7 integral membrane protein OS=Homo sapiens OX=9606 GN=STOM PE=1 SV=3;tr|F8VSL7|F8VSL7_HUMAN Erythrocyte band 7 integral membrane protein OS=Homo sapiens OX=9606 GN=STOM PE=1 SV=1	5	3	0	2	7	7	7	0	3	0	1	2	1	3	0	0	0	0	1	2	3	3	1	3	2	0	1	1	0	3	0	1	2	1	3	0	0	0	0	1	2	3
P31689	P31689	12	12	12	DnaJ homolog subfamily A member 1	DNAJA1	sp|P31689|DNJA1_HUMAN DnaJ homolog subfamily A member 1 OS=Homo sapiens OX=9606 GN=DNAJA1 PE=1 SV=2	9	5	0	1	12	12	12	6	2	3	2	3	1	1	0	0	1	0	1	5	6	4	4	6	5	2	4	2	6	2	3	2	3	1	1	0	0	1	0	1	5	6
P35613;A0A087WUV8;A0A087X2B5;I3L192;R4GMX5;R4GN83;A0A2R8YDZ0	P35613;A0A087WUV8;A0A087X2B5;I3L192	7;6;6;4;3;2;1	7;6;6;4;3;2;1	7;6;6;4;3;2;1	Basigin	BSG	sp|P35613|BASI_HUMAN Basigin OS=Homo sapiens OX=9606 GN=BSG PE=1 SV=2;tr|A0A087WUV8|A0A087WUV8_HUMAN Basigin OS=Homo sapiens OX=9606 GN=BSG PE=1 SV=1;tr|A0A087X2B5|A0A087X2B5_HUMAN Basigin (Fragment) OS=Homo sapiens OX=9606 GN=BSG PE=1 SV=1;tr|I3L192|I3L19	9	7	2	7	7	7	7	4	4	5	4	3	3	2	1	0	1	2	4	5	6	7	6	6	5	7	6	5	4	4	5	4	3	3	2	1	0	1	2	4	5	6
P40222;Q8N3L3	P40222	25;1	25;1	24;0	Alpha-taxilin	TXLNA	sp|P40222|TXLNA_HUMAN Alpha-taxilin OS=Homo sapiens OX=9606 GN=TXLNA PE=1 SV=3	9	6	0	2	25	25	24	7	3	3	5	3	1	4	1	1	0	0	0	7	13	12	12	10	8	9	6	4	7	3	3	5	3	1	4	1	1	0	0	0	7	13
P42566;B1AUU8;S4R3U1	P42566;B1AUU8	33;28;4	33;28;4	33;28;4	Epidermal growth factor receptor substrate 15	EPS15	sp|P42566|EPS15_HUMAN Epidermal growth factor receptor substrate 15 OS=Homo sapiens OX=9606 GN=EPS15 PE=1 SV=2;tr|B1AUU8|B1AUU8_HUMAN Epidermal growth factor receptor substrate 15 OS=Homo sapiens OX=9606 GN=EPS15 PE=1 SV=1	9	7	0	3	33	33	33	11	8	7	5	6	3	3	0	0	0	0	0	19	21	23	17	18	11	14	15	12	11	8	7	5	6	3	3	0	0	0	0	0	19	21
P49674;H0Y645;B0QY35;B0QY34;A0A669KBC0;H0Y682;H0Y5S9;J3QQI9;B0QY36;H0Y2N6	P49674;H0Y645;B0QY35;B0QY34;A0A669KBC0	15;10;10;10;10;6;5;5;5;4	15;10;10;10;10;6;5;5;5;4	6;1;1;1;1;5;5;0;0;0	Casein kinase I isoform epsilon	CSNK1E	sp|P49674|KC1E_HUMAN Casein kinase I isoform epsilon OS=Homo sapiens OX=9606 GN=CSNK1E PE=1 SV=1;tr|H0Y645|H0Y645_HUMAN Casein kinase I isoform epsilon (Fragment) OS=Homo sapiens OX=9606 GN=CSNK1E PE=1 SV=1;tr|B0QY35|B0QY35_HUMAN Casein kinase I isoform ep	9	4	0	10	15	15	6	6	5	1	3	5	1	1	1	0	0	0	0	6	9	6	5	4	6	4	3	3	6	5	1	3	5	1	1	1	0	0	0	0	6	9
P49840;A8MT37;M0QYV0	P49840;A8MT37	19;16;7	14;11;6	14;11;6	Glycogen synthase kinase-3 alpha	GSK3A	sp|P49840|GSK3A_HUMAN Glycogen synthase kinase-3 alpha OS=Homo sapiens OX=9606 GN=GSK3A PE=1 SV=2;tr|A8MT37|A8MT37_HUMAN [Tau protein] kinase OS=Homo sapiens OX=9606 GN=GSK3A PE=1 SV=2	8	5	0	3	19	14	14	8	4	3	0	4	2	0	0	0	0	0	0	8	10	14	7	8	9	7	5	2	6	4	3	0	4	2	0	0	0	0	0	0	6	8
P49841;A0A3B3ITW1	P49841;A0A3B3ITW1	19;17	19;17	14;12	Glycogen synthase kinase-3 beta	GSK3B	sp|P49841|GSK3B_HUMAN Glycogen synthase kinase-3 beta OS=Homo sapiens OX=9606 GN=GSK3B PE=1 SV=2;tr|A0A3B3ITW1|A0A3B3ITW1_HUMAN Glycogen synthase kinase-3 beta OS=Homo sapiens OX=9606 GN=GSK3B PE=1 SV=1	9	6	0	2	19	19	14	6	6	3	3	2	2	1	0	0	0	0	0	9	11	15	10	11	9	8	4	5	6	6	3	3	2	2	1	0	0	0	0	0	9	11
P50995;H0Y6E1	P50995	9;3	9;3	9;3	Annexin A11	ANXA11	sp|P50995|ANX11_HUMAN Annexin A11 OS=Homo sapiens OX=9606 GN=ANXA11 PE=1 SV=1	4	2	2	2	9	9	9	3	3	1	1	1	0	0	0	0	2	2	3	2	4	4	1	1	0	2	2	0	3	3	1	1	1	0	0	0	0	2	2	3	2	4
P52292;J3QLL0;J3KS65	P52292	4;1;1	4;1;1	4;1;1	Importin subunit alpha-1	KPNA2	sp|P52292|IMA1_HUMAN Importin subunit alpha-1 OS=Homo sapiens OX=9606 GN=KPNA2 PE=1 SV=1	1	2	0	3	4	4	4	2	2	0	0	0	0	0	0	0	0	0	0	1	3	3	1	1	1	0	0	0	2	2	0	0	0	0	0	0	0	0	0	0	1	3
P53350;I3L2H5;I3L387;I3L309	P53350	18;4;4;1	18;4;4;1	18;4;4;1	Serine/threonine-protein kinase PLK1	PLK1	sp|P53350|PLK1_HUMAN Serine/threonine-protein kinase PLK1 OS=Homo sapiens OX=9606 GN=PLK1 PE=1 SV=1	9	6	0	4	18	18	18	7	7	3	2	4	1	3	1	0	0	0	0	7	7	11	7	9	5	6	6	6	7	7	3	2	4	1	3	1	0	0	0	0	7	7
P55072;C9JUP7;C9IZA5	P55072	21;2;2	21;2;2	21;2;2	Transitional endoplasmic reticulum ATPase	VCP	sp|P55072|TERA_HUMAN Transitional endoplasmic reticulum ATPase OS=Homo sapiens OX=9606 GN=VCP PE=1 SV=4	8	3	0	3	21	21	21	5	12	4	1	0	0	0	0	0	0	0	0	7	11	10	8	5	3	3	2	0	5	12	4	1	0	0	0	0	0	0	0	0	7	11
P60953;Q5JYX0;A0A590UJK8	P60953	7;2;2	6;1;1	6;1;1	Cell division control protein 42 homolog	CDC42	sp|P60953|CDC42_HUMAN Cell division control protein 42 homolog OS=Homo sapiens OX=9606 GN=CDC42 PE=1 SV=2	2	3	0	3	7	6	6	3	7	2	0	0	1	1	0	0	0	0	0	1	1	2	2	2	1	1	2	1	3	6	2	0	0	1	1	0	0	0	0	0	1	1
P61224;E7ESV4;F5H7Y6;F5GX62;A6NIZ1;F5H823;B7ZB78;F5GZG1;F5H6R7;F5H004;F5H077;F5GWU8;F5H491;F5H0B7;F5H500;F5GYB5;F5H4H0;F5GYH7;F8WBC0	P61224;E7ESV4;F5H7Y6;F5GX62;A6NIZ1;F5H823;B7ZB78;F5GZG1;F5H6R7;F5H004	11;9;9;8;8;6;6;6;6;6;5;5;5;5;5;5;4;4;2	11;9;9;8;8;6;6;6;6;6;5;5;5;5;5;5;4;4;2	3;3;3;2;2;2;2;2;2;2;1;1;1;1;1;1;0;0;0	Ras-related protein Rap-1b;Ras-related protein Rap-1b-like protein	RAP1B	sp|P61224|RAP1B_HUMAN Ras-related protein Rap-1b OS=Homo sapiens OX=9606 GN=RAP1B PE=1 SV=1;tr|E7ESV4|E7ESV4_HUMAN Ras-related protein Rap-1b (Fragment) OS=Homo sapiens OX=9606 GN=RAP1B PE=1 SV=1;tr|F5H7Y6|F5H7Y6_HUMAN Ras-related protein Rap-1b OS=Homo sa	9	6	0	19	11	11	3	4	4	3	2	2	1	2	0	0	1	1	1	4	9	8	4	3	4	4	3	2	4	4	3	2	2	1	2	0	0	1	1	1	4	9
P61586;Q5JR08;P08134;Q5JR07;C9JNR4;E9PQH6;C9JX21;Q5JR05;E9PLA2;C9JRM1;Q5JR06;E9PN11;U3KQA9;U3KQV3	P61586;Q5JR08;P08134;Q5JR07;C9JNR4;E9PQH6;C9JX21;Q5JR05	8;6;6;5;5;5;5;5;2;2;2;2;2;2	8;6;6;5;5;5;5;5;2;2;2;2;2;2	7;5;5;4;4;4;4;4;1;1;1;1;1;1	Transforming protein RhoA;Rho-related GTP-binding protein RhoC	RHOA;RHOC	sp|P61586|RHOA_HUMAN Transforming protein RhoA OS=Homo sapiens OX=9606 GN=RHOA PE=1 SV=1;tr|Q5JR08|Q5JR08_HUMAN Rho-related GTP-binding protein RhoC (Fragment) OS=Homo sapiens OX=9606 GN=RHOC PE=1 SV=8;sp|P08134|RHOC_HUMAN Rho-related GTP-binding protein R	7	1	0	14	8	8	7	3	2	1	0	1	1	1	0	0	0	0	1	5	3	4	3	2	3	2	1	1	3	2	1	0	1	1	1	0	0	0	0	1	5	3
P62937;F8WE65;C9J5S7;E5RIZ5;P0DN26;A0A0H2UH34;A0A0B4J2A2;A0A075B767;A0A075B759;Q9Y536;F5H284	P62937;F8WE65;C9J5S7	9;7;7;1;1;1;1;1;1;1;1	9;7;7;1;1;1;1;1;1;1;1	9;7;7;1;1;1;1;1;1;1;1	Peptidyl-prolyl cis-trans isomerase A;Peptidyl-prolyl cis-trans isomerase A, N-terminally processed;Peptidyl-prolyl cis-trans isomerase	PPIA	sp|P62937|PPIA_HUMAN Peptidyl-prolyl cis-trans isomerase A OS=Homo sapiens OX=9606 GN=PPIA PE=1 SV=2;tr|F8WE65|F8WE65_HUMAN Peptidyl-prolyl cis-trans isomerase OS=Homo sapiens OX=9606 GN=PPIA PE=1 SV=1;tr|C9J5S7|C9J5S7_HUMAN Peptidyl-prolyl cis-trans isome	8	1	0	11	9	9	9	1	2	1	0	2	0	0	0	0	0	0	1	2	3	7	4	3	4	2	3	2	1	2	1	0	2	0	0	0	0	0	0	1	2	3
P63000;P15153;B1AH77;B1AH80;B1AH78	P63000;P15153	10;5;4;4;3	10;5;4;4;3	5;1;1;1;1	Ras-related C3 botulinum toxin substrate 1;Ras-related C3 botulinum toxin substrate 2	RAC1;RAC2	sp|P63000|RAC1_HUMAN Ras-related C3 botulinum toxin substrate 1 OS=Homo sapiens OX=9606 GN=RAC1 PE=1 SV=1;sp|P15153|RAC2_HUMAN Ras-related C3 botulinum toxin substrate 2 OS=Homo sapiens OX=9606 GN=RAC2 PE=1 SV=1	7	5	1	5	10	10	5	6	5	1	2	2	1	2	1	1	1	1	2	3	4	5	6	6	4	2	3	1	6	5	1	2	2	1	2	1	1	1	1	2	3	4
P63010;A0A087X253;A0A087WU93;A0A087WZQ6;A0A087WYD1;K7ERB2;K7EN71;K7EJ01;H7C034;K7EJX1;A0A087WXS3;K7EKZ5	P63010;A0A087X253;A0A087WU93;A0A087WZQ6	25;21;16;16;12;6;5;4;3;2;1;1	25;21;16;16;12;6;5;4;3;2;1;1	14;14;6;6;6;2;2;1;0;2;1;1	AP-2 complex subunit beta	AP2B1	sp|P63010|AP2B1_HUMAN AP-2 complex subunit beta OS=Homo sapiens OX=9606 GN=AP2B1 PE=1 SV=1;tr|A0A087X253|A0A087X253_HUMAN AP complex subunit beta OS=Homo sapiens OX=9606 GN=AP2B1 PE=1 SV=1;tr|A0A087WU93|A0A087WU93_HUMAN AP-2 complex subunit beta (Fragment)	9	1	0	12	25	25	14	1	5	2	2	2	0	1	1	0	0	0	0	9	12	13	7	9	4	4	8	2	1	5	2	2	2	0	1	1	0	0	0	0	9	12
P63104;E7EX29;E7ESK7;B0AZS6;E5RGE1;E5RIR4;E9PD24;E7EVZ2;B7Z2E6;H0YB80	P63104;E7EX29;E7ESK7;B0AZS6	10;7;6;6;4;4;4;4;4;4	10;7;6;6;4;4;4;4;4;4	8;5;5;5;3;3;3;3;3;3	14-3-3 protein zeta/delta	YWHAZ	sp|P63104|1433Z_HUMAN 14-3-3 protein zeta/delta OS=Homo sapiens OX=9606 GN=YWHAZ PE=1 SV=1;tr|E7EX29|E7EX29_HUMAN 14-3-3 protein zeta/delta (Fragment) OS=Homo sapiens OX=9606 GN=YWHAZ PE=1 SV=1;tr|E7ESK7|E7ESK7_HUMAN 14-3-3 protein zeta/delta (Fragment) OS	5	2	0	10	10	10	8	4	4	0	0	0	1	1	0	0	0	0	3	2	4	4	3	3	0	0	1	0	4	4	0	0	0	1	1	0	0	0	0	3	2	4
P63261;I3L3I0;I3L1U9;I3L3R2;J3KT65;I3L4N8;K7EM38	P63261;I3L3I0;I3L1U9;I3L3R2;J3KT65;I3L4N8	24;16;16;12;12;12;11	24;16;16;12;12;12;11	1;1;1;1;1;1;1	Actin, cytoplasmic 2;Actin, cytoplasmic 2, N-terminally processed	ACTG1	sp|P63261|ACTG_HUMAN Actin, cytoplasmic 2 OS=Homo sapiens OX=9606 GN=ACTG1 PE=1 SV=1;tr|I3L3I0|I3L3I0_HUMAN Actin, cytoplasmic 2 (Fragment) OS=Homo sapiens OX=9606 GN=ACTG1 PE=1 SV=1;tr|I3L1U9|I3L1U9_HUMAN Actin, cytoplasmic 2 (Fragment) OS=Homo sapiens OX	9	9	3	7	24	24	1	13	12	11	6	12	5	7	3	5	5	6	6	10	10	11	10	11	9	7	8	9	13	12	11	6	12	5	7	3	5	5	6	6	10	10
P68363;F8VVB9;F8VQQ4;F8VRZ4;F8VS66;F8VX09;F8VWV9;F8VRK0;C9K0S6;F8W0F6;F8VXZ7;A6NHL2	P68363;F8VVB9;F8VQQ4	15;9;8;7;7;6;6;4;2;2;1;1	15;9;8;7;7;6;6;4;2;2;1;1	0;0;0;0;0;0;0;0;0;0;0;0	Tubulin alpha-1B chain	TUBA1B;TUBA1A	sp|P68363|TBA1B_HUMAN Tubulin alpha-1B chain OS=Homo sapiens OX=9606 GN=TUBA1B PE=1 SV=1;tr|F8VVB9|F8VVB9_HUMAN Tubulin alpha-1B chain (Fragment) OS=Homo sapiens OX=9606 GN=TUBA1B PE=1 SV=8;tr|F8VQQ4|F8VQQ4_HUMAN Tubulin alpha chain (Fragment) OS=Homo sapi	9	7	1	12	15	15	0	7	7	8	2	6	5	4	0	0	1	1	8	6	9	10	9	5	5	4	6	4	7	7	8	2	6	5	4	0	0	1	1	8	6	9
P68366;C9JEV8;C9JQ00;C9JJQ8;C9JDL2	P68366	14;6;6;6;5	5;4;4;4;3	5;4;4;4;3	Tubulin alpha-4A chain	TUBA4A	sp|P68366|TBA4A_HUMAN Tubulin alpha-4A chain OS=Homo sapiens OX=9606 GN=TUBA4A PE=1 SV=1	3	3	1	5	14	5	5	7	7	6	3	7	4	5	0	0	1	1	7	6	10	11	6	5	4	3	6	3	2	3	1	1	3	0	1	0	0	0	0	2	2	3
Q01650	Q01650	4	4	4	Large neutral amino acids transporter small subunit 1	SLC7A5	sp|Q01650|LAT1_HUMAN Large neutral amino acids transporter small subunit 1 OS=Homo sapiens OX=9606 GN=SLC7A5 PE=1 SV=2	3	1	0	1	4	4	4	3	1	1	1	2	0	2	0	0	0	0	0	2	1	3	2	1	1	2	1	0	3	1	1	1	2	0	2	0	0	0	0	0	2	1
Q08431;H0YKS8;A0A087WUV5	Q08431;H0YKS8	16;10;3	16;10;3	16;10;3	Lactadherin;Lactadherin short form;Medin	MFGE8	sp|Q08431|MFGM_HUMAN Lactadherin OS=Homo sapiens OX=9606 GN=MFGE8 PE=1 SV=3;tr|H0YKS8|H0YKS8_HUMAN Lactadherin (Fragment) OS=Homo sapiens OX=9606 GN=MFGE8 PE=1 SV=1	9	5	2	3	16	16	16	7	8	5	3	5	1	2	0	0	4	2	6	7	9	8	5	6	3	5	5	5	7	8	5	3	5	1	2	0	0	4	2	6	7	9
Q0JRZ9;H7BXJ4;H0YAE2	Q0JRZ9;H7BXJ4	16;8;5	16;8;5	16;8;5	F-BAR domain only protein 2	FCHO2	sp|Q0JRZ9|FCHO2_HUMAN F-BAR domain only protein 2 OS=Homo sapiens OX=9606 GN=FCHO2 PE=1 SV=2;tr|H7BXJ4|H7BXJ4_HUMAN F-BAR domain only protein 2 OS=Homo sapiens OX=9606 GN=FCHO2 PE=1 SV=1	9	4	0	3	16	16	16	4	5	2	0	3	1	0	0	0	0	0	0	4	12	10	7	5	3	3	5	3	4	5	2	0	3	1	0	0	0	0	0	0	4	12
Q14974;J3KTM9;J3QR48;J3QKQ5;J3QRG4	Q14974;J3KTM9	10;7;3;2;1	10;7;3;2;1	10;7;3;2;1	Importin subunit beta-1	KPNB1	sp|Q14974|IMB1_HUMAN Importin subunit beta-1 OS=Homo sapiens OX=9606 GN=KPNB1 PE=1 SV=2;tr|J3KTM9|J3KTM9_HUMAN Importin subunit beta-1 (Fragment) OS=Homo sapiens OX=9606 GN=KPNB1 PE=1 SV=1	7	1	0	5	10	10	10	1	3	0	1	0	0	0	0	0	0	0	0	3	6	6	3	4	2	2	2	0	1	3	0	1	0	0	0	0	0	0	0	0	3	6
Q15365	Q15365	5	3	3	Poly(rC)-binding protein 1	PCBP1	sp|Q15365|PCBP1_HUMAN Poly(rC)-binding protein 1 OS=Homo sapiens OX=9606 GN=PCBP1 PE=1 SV=2	3	3	0	1	5	3	3	3	2	1	3	0	1	1	0	0	0	0	0	4	3	3	2	2	3	1	2	1	3	2	0	2	0	0	0	0	0	0	0	0	2	2
Q15758;M0QXM4;M0QX44;M0R144	Q15758;M0QXM4	13;9;3;2	13;9;3;2	13;9;3;2	Neutral amino acid transporter B(0);Amino acid transporter	SLC1A5	sp|Q15758|AAAT_HUMAN Neutral amino acid transporter B(0) OS=Homo sapiens OX=9606 GN=SLC1A5 PE=1 SV=2;tr|M0QXM4|M0QXM4_HUMAN Amino acid transporter OS=Homo sapiens OX=9606 GN=SLC1A5 PE=1 SV=1	9	5	1	4	13	13	13	7	6	4	1	3	3	1	0	0	1	1	3	7	7	7	5	5	6	6	6	6	7	6	4	1	3	3	1	0	0	1	1	3	7	7
Q15811;F8W7U0;A8CTZ0;C9JQZ7;D6PAW0;H7C429;H0Y523;H0Y6W3;Q6J334;H0Y3G5	Q15811;F8W7U0;A8CTZ0	24;22;21;6;4;2;2;1;1;1	24;22;21;6;4;2;2;1;1;1	9;9;9;3;3;1;2;0;0;0	Intersectin-1	ITSN1	sp|Q15811|ITSN1_HUMAN Intersectin-1 OS=Homo sapiens OX=9606 GN=ITSN1 PE=1 SV=3;tr|F8W7U0|F8W7U0_HUMAN Intersectin-1 OS=Homo sapiens OX=9606 GN=ITSN1 PE=1 SV=1;tr|A8CTZ0|A8CTZ0_HUMAN Intersectin 1 short form variant 13 OS=Homo sapiens OX=9606 GN=ITSN1 PE=1	9	7	0	10	24	24	9	9	8	2	2	2	2	2	0	0	0	0	0	8	11	13	10	10	7	8	7	4	9	8	2	2	2	2	2	0	0	0	0	0	8	11
Q53EZ4;H0Y432	Q53EZ4	20;9	20;9	20;9	Centrosomal protein of 55 kDa	CEP55	sp|Q53EZ4|CEP55_HUMAN Centrosomal protein of 55 kDa OS=Homo sapiens OX=9606 GN=CEP55 PE=1 SV=3	9	6	0	2	20	20	20	6	11	3	8	4	1	3	1	0	0	0	0	4	7	6	5	4	5	4	5	4	6	11	3	8	4	1	3	1	0	0	0	0	4	7
Q5VTE0;P68104;A0A087WVQ9;A0A087WV01;A0A2U3TZH3;Q05639;A6PW80;Q5JR01;A0A2R8Y660;A0A2R8Y488;A0A2R8YDN5	Q5VTE0;P68104;A0A087WVQ9;A0A087WV01;A0A2U3TZH3;Q05639	6;6;5;4;3;3;2;2;2;2;1	6;6;5;4;3;3;2;2;2;2;1	6;6;5;4;3;3;2;2;2;2;1	Putative elongation factor 1-alpha-like 3;Elongation factor 1-alpha 1;Elongation factor 1-alpha;Elongation factor 1-alpha 2	EEF1A1P5;EEF1A1;EEF1A2	sp|Q5VTE0|EF1A3_HUMAN Putative elongation factor 1-alpha-like 3 OS=Homo sapiens OX=9606 GN=EEF1A1P5 PE=5 SV=1;sp|P68104|EF1A1_HUMAN Elongation factor 1-alpha 1 OS=Homo sapiens OX=9606 GN=EEF1A1 PE=1 SV=1;tr|A0A087WVQ9|A0A087WVQ9_HUMAN Elongation factor 1-a	8	3	1	11	6	6	6	2	3	1	1	2	1	1	0	0	1	1	3	3	3	4	3	2	3	3	2	0	2	3	1	1	2	1	1	0	0	1	1	3	3	3
Q5VW32;F5GXQ0;Q5VW33	Q5VW32;F5GXQ0	13;10;6	13;10;6	13;10;6	BRO1 domain-containing protein BROX	BROX	sp|Q5VW32|BROX_HUMAN BRO1 domain-containing protein BROX OS=Homo sapiens OX=9606 GN=BROX PE=1 SV=1;tr|F5GXQ0|F5GXQ0_HUMAN BRO1 domain- and CAAX motif-containing protein OS=Homo sapiens OX=9606 GN=BROX PE=1 SV=1	8	5	0	3	13	13	13	4	4	3	0	3	0	2	0	0	0	0	0	3	4	6	4	3	3	3	3	1	4	4	3	0	3	0	2	0	0	0	0	0	3	4
Q6P1N0;K7EJY5	Q6P1N0	21;5	21;5	9;5	Coiled-coil and C2 domain-containing protein 1A	CC2D1A	sp|Q6P1N0|C2D1A_HUMAN Coiled-coil and C2 domain-containing protein 1A OS=Homo sapiens OX=9606 GN=CC2D1A PE=1 SV=1	9	6	0	2	21	21	9	7	8	6	5	4	2	2	0	0	0	0	0	8	9	14	8	6	9	10	7	5	7	8	6	5	4	2	2	0	0	0	0	0	8	9
Q77YG6	Q77YG6	20	20	20			tr|Q77YG6|Q77YG6_MPMV Glycoprotein 20 OS=Mason-Pfizer monkey virus OX=11855 GN=env PE=4 SV=1	9	7	0	1	20	20	20	11	13	8	8	8	7	6	1	1	1	0	0	10	12	14	13	12	11	11	9	8	11	13	8	8	8	7	6	1	1	1	0	0	10	12
Q8WUM4;A0A3B3IT07;C9IZF9;F8WEQ7;F8WBR8;F8WDK9	Q8WUM4	68;16;11;8;8;6	68;16;11;8;8;6	68;16;11;8;8;6	Programmed cell death 6-interacting protein	PDCD6IP	sp|Q8WUM4|PDC6I_HUMAN Programmed cell death 6-interacting protein OS=Homo sapiens OX=9606 GN=PDCD6IP PE=1 SV=1	9	8	3	6	68	68	68	29	40	27	21	32	23	18	2	1	3	3	5	32	38	40	35	30	29	31	31	26	29	40	27	21	32	23	18	2	1	3	3	5	32	38
Q969P0;C9J8Z4	Q969P0;C9J8Z4	17;12	17;12	17;12	Immunoglobulin superfamily member 8	IGSF8	sp|Q969P0|IGSF8_HUMAN Immunoglobulin superfamily member 8 OS=Homo sapiens OX=9606 GN=IGSF8 PE=1 SV=1;tr|C9J8Z4|C9J8Z4_HUMAN Immunoglobulin superfamily member 8 (Fragment) OS=Homo sapiens OX=9606 GN=IGSF8 PE=1 SV=1	9	7	1	2	17	17	17	9	11	5	8	5	4	3	0	0	0	0	2	8	6	12	11	8	7	8	8	5	9	11	5	8	5	4	3	0	0	0	0	2	8	6
Q96EY5;E9PQA6;E9PLZ8;M0QZK6;E9PLL0;E9PJW8	Q96EY5;E9PQA6;E9PLZ8;M0QZK6	10;8;6;5;4;1	10;8;6;5;4;1	10;8;6;5;4;1	Multivesicular body subunit 12A	MVB12A	sp|Q96EY5|MB12A_HUMAN Multivesicular body subunit 12A OS=Homo sapiens OX=9606 GN=MVB12A PE=1 SV=1;tr|E9PQA6|E9PQA6_HUMAN Multivesicular body subunit 12A OS=Homo sapiens OX=9606 GN=MVB12A PE=1 SV=1;tr|E9PLZ8|E9PLZ8_HUMAN ESCRT-I complex subunit MVB12A (Frag	3	3	0	6	10	10	10	3	5	3	1	2	0	0	0	0	0	0	0	3	4	5	1	2	2	1	0	1	3	5	3	1	2	0	0	0	0	0	0	0	3	4
Q99816;F5H442;J3QRU6;J3QKS4	Q99816;F5H442	15;14;2;2	15;14;2;2	15;14;2;2	Tumor susceptibility gene 101 protein	TSG101	sp|Q99816|TS101_HUMAN Tumor susceptibility gene 101 protein OS=Homo sapiens OX=9606 GN=TSG101 PE=1 SV=2;tr|F5H442|F5H442_HUMAN Tumor susceptibility gene 101 protein OS=Homo sapiens OX=9606 GN=TSG101 PE=1 SV=1	9	8	0	4	15	15	15	7	7	6	5	5	4	3	2	1	0	0	0	10	8	8	8	8	7	8	5	7	7	7	6	5	5	4	3	2	1	0	0	0	10	8
Q99961;M0QYE0;M0R0I3;Q99962;M0R2K6	Q99961;M0QYE0;M0R0I3	10;6;6;2;1	10;6;6;2;1	10;6;6;2;1	Endophilin-A2	SH3GL1	sp|Q99961|SH3G1_HUMAN Endophilin-A2 OS=Homo sapiens OX=9606 GN=SH3GL1 PE=1 SV=1;tr|M0QYE0|M0QYE0_HUMAN Endophilin-A2 (Fragment) OS=Homo sapiens OX=9606 GN=SH3GL1 PE=1 SV=8;tr|M0R0I3|M0R0I3_HUMAN Endophilin-A2 (Fragment) OS=Homo sapiens OX=9606 GN=SH3GL1 PE	8	2	0	5	10	10	10	4	2	1	0	1	1	0	0	0	0	0	0	4	5	4	5	3	4	3	3	1	4	2	1	0	1	1	0	0	0	0	0	0	4	5
Q9BRG1;K7EKV4;K7EP45;K7ENE3	Q9BRG1;K7EKV4	7;4;3;2	7;4;3;2	7;4;3;2	Vacuolar protein-sorting-associated protein 25	VPS25	sp|Q9BRG1|VPS25_HUMAN Vacuolar protein-sorting-associated protein 25 OS=Homo sapiens OX=9606 GN=VPS25 PE=1 SV=1;tr|K7EKV4|K7EKV4_HUMAN ESCRT-II complex subunit VPS25 (Fragment) OS=Homo sapiens OX=9606 GN=VPS25 PE=1 SV=1	8	1	0	4	7	7	7	3	0	0	0	0	0	0	0	0	0	0	0	3	5	5	2	4	3	1	3	3	3	0	0	0	0	0	0	0	0	0	0	0	3	5
Q9H223	Q9H223	17	17	14	EH domain-containing protein 4	EHD4	sp|Q9H223|EHD4_HUMAN EH domain-containing protein 4 OS=Homo sapiens OX=9606 GN=EHD4 PE=1 SV=1	9	7	0	1	17	17	14	3	5	4	5	5	2	3	0	0	0	0	0	9	8	12	8	10	5	5	5	3	3	5	4	5	5	2	3	0	0	0	0	0	9	8
Q9H444	Q9H444	11	11	10	Charged multivesicular body protein 4b	CHMP4B	sp|Q9H444|CHM4B_HUMAN Charged multivesicular body protein 4b OS=Homo sapiens OX=9606 GN=CHMP4B PE=1 SV=1	9	8	0	1	11	11	10	5	7	7	3	4	3	4	1	2	0	0	0	3	4	4	2	2	3	3	2	2	5	7	7	3	4	3	4	1	2	0	0	0	3	4
Q9H9H4;F5H4M0;F5H1F6	Q9H9H4;F5H4M0	15;11;7	15;11;7	15;11;7	Vacuolar protein sorting-associated protein 37B	VPS37B	sp|Q9H9H4|VP37B_HUMAN Vacuolar protein sorting-associated protein 37B OS=Homo sapiens OX=9606 GN=VPS37B PE=1 SV=1;tr|F5H4M0|F5H4M0_HUMAN Vacuolar protein sorting-associated protein 37B (Fragment) OS=Homo sapiens OX=9606 GN=VPS37B PE=1 SV=1	9	4	0	3	15	15	15	5	6	2	0	2	0	1	0	0	0	0	0	6	9	8	4	4	4	3	5	4	5	6	2	0	2	0	1	0	0	0	0	0	6	9
Q9HCE1;Q5JR04	Q9HCE1;Q5JR04	28;27	28;27	28;27	Putative helicase MOV-10	MOV10	sp|Q9HCE1|MOV10_HUMAN Helicase MOV-10 OS=Homo sapiens OX=9606 GN=MOV10 PE=1 SV=2;tr|Q5JR04|Q5JR04_HUMAN RNA helicase OS=Homo sapiens OX=9606 GN=MOV10 PE=1 SV=1	9	2	0	2	28	28	28	7	1	2	1	2	1	2	0	0	0	0	0	14	15	17	13	17	10	11	12	6	7	1	2	1	2	1	2	0	0	0	0	0	14	15
Q9NUQ3	Q9NUQ3	12	11	11	Gamma-taxilin	TXLNG	sp|Q9NUQ3|TXLNG_HUMAN Gamma-taxilin OS=Homo sapiens OX=9606 GN=TXLNG PE=1 SV=2	9	1	0	1	12	11	11	2	1	1	1	0	1	2	1	0	0	0	0	6	9	7	6	6	5	6	5	2	2	1	0	1	0	1	1	0	0	0	0	0	6	9
Q9NZI8;F8W930;O00425;Q9Y6M1	Q9NZI8	3;1;1;1	3;1;1;1	3;1;1;1	Insulin-like growth factor 2 mRNA-binding protein 1	IGF2BP1	sp|Q9NZI8|IF2B1_HUMAN Insulin-like growth factor 2 mRNA-binding protein 1 OS=Homo sapiens OX=9606 GN=IGF2BP1 PE=1 SV=2	2	2	0	4	3	3	3	3	2	1	0	0	0	1	0	0	0	0	0	1	1	2	2	1	1	0	0	0	3	2	1	0	0	0	1	0	0	0	0	0	1	1
Q9NZZ3	Q9NZZ3	6	6	6	Charged multivesicular body protein 5	CHMP5	sp|Q9NZZ3|CHMP5_HUMAN Charged multivesicular body protein 5 OS=Homo sapiens OX=9606 GN=CHMP5 PE=1 SV=1	3	2	0	1	6	6	6	4	4	0	1	0	1	1	0	0	0	0	0	1	1	4	1	0	2	1	2	0	4	4	0	1	0	1	1	0	0	0	0	0	1	1
Q9P2B2	Q9P2B2	31	31	31	Prostaglandin F2 receptor negative regulator	PTGFRN	sp|Q9P2B2|FPRP_HUMAN Prostaglandin F2 receptor negative regulator OS=Homo sapiens OX=9606 GN=PTGFRN PE=1 SV=2	9	4	0	1	31	31	31	13	8	6	4	2	1	0	1	1	1	0	0	18	20	22	19	18	15	15	14	9	13	8	6	4	2	1	0	1	1	1	0	0	18	20
Q9UBC2;M0R165;M0R2S2;M0R1V5;M0R3I1;K7EJR2;M0R330;M0QX30	Q9UBC2;M0R165;M0R2S2	53;51;31;10;10;7;7;6	53;51;31;10;10;7;7;6	53;51;31;10;10;7;7;6	Epidermal growth factor receptor substrate 15-like 1	EPS15L1	sp|Q9UBC2|EP15R_HUMAN Epidermal growth factor receptor substrate 15-like 1 OS=Homo sapiens OX=9606 GN=EPS15L1 PE=1 SV=1;tr|M0R165|M0R165_HUMAN Epidermal growth factor receptor substrate 15-like 1 OS=Homo sapiens OX=9606 GN=EPS15L1 PE=1 SV=1;tr|M0R2S2|M0R2S	9	9	0	8	53	53	53	23	23	13	7	16	9	7	2	3	0	0	0	25	30	32	27	27	23	24	22	15	23	23	13	7	16	9	7	2	3	0	0	0	25	30
Q9UK41;E9PQR7;E9PM90;E9PR04;E9PLM9	Q9UK41;E9PQR7;E9PM90	13;12;7;4;2	13;12;7;4;2	13;12;7;4;2	Vacuolar protein sorting-associated protein 28 homolog	VPS28	sp|Q9UK41|VPS28_HUMAN Vacuolar protein sorting-associated protein 28 homolog OS=Homo sapiens OX=9606 GN=VPS28 PE=1 SV=1;tr|E9PQR7|E9PQR7_HUMAN Vacuolar protein sorting-associated protein 28 homolog (Fragment) OS=Homo sapiens OX=9606 GN=VPS28 PE=1 SV=1;tr|E	9	7	0	5	13	13	13	4	5	4	3	4	3	2	0	0	0	0	0	9	9	10	9	9	8	7	6	5	4	5	4	3	4	3	2	0	0	0	0	0	9	9
Q9UKS6;A0A0C4DGG1;E9PIY1;E9PJ75;E9PNM9;E9PJ33;H0YDM6	Q9UKS6;A0A0C4DGG1;E9PIY1	11;10;7;4;4;2;2	11;10;7;4;4;2;2	11;10;7;4;4;2;2	Protein kinase C and casein kinase substrate in neurons protein 3	PACSIN3	sp|Q9UKS6|PACN3_HUMAN Protein kinase C and casein kinase substrate in neurons protein 3 OS=Homo sapiens OX=9606 GN=PACSIN3 PE=1 SV=2;tr|A0A0C4DGG1|A0A0C4DGG1_HUMAN Protein kinase C and casein kinase substrate in neurons protein 3 (Fragment) OS=Homo sapiens	9	3	0	7	11	11	11	6	3	3	1	1	0	0	0	0	0	0	0	6	6	7	5	5	2	5	5	3	6	3	3	1	1	0	0	0	0	0	0	0	6	6
Q9UN37;I3L4J1	Q9UN37;I3L4J1	10;8	7;5	7;5	Vacuolar protein sorting-associated protein 4A	VPS4A	sp|Q9UN37|VPS4A_HUMAN Vacuolar protein sorting-associated protein 4A OS=Homo sapiens OX=9606 GN=VPS4A PE=1 SV=1;tr|I3L4J1|I3L4J1_HUMAN Vesicle-fusing ATPase (Fragment) OS=Homo sapiens OX=9606 PE=1 SV=3	3	1	0	2	10	7	7	4	4	2	1	3	2	2	0	0	0	0	1	2	4	5	2	2	1	2	4	1	2	2	1	1	2	1	1	0	0	0	0	0	1	3
Q9UNF0;A0A0U1RR22;B0QYG7;B0QYG8;H0Y923	Q9UNF0;A0A0U1RR22	19;17;6;6;1	19;17;6;6;1	19;17;6;6;1	Protein kinase C and casein kinase substrate in neurons protein 2	PACSIN2	sp|Q9UNF0|PACN2_HUMAN Protein kinase C and casein kinase substrate in neurons protein 2 OS=Homo sapiens OX=9606 GN=PACSIN2 PE=1 SV=2;tr|A0A0U1RR22|A0A0U1RR22_HUMAN Protein kinase C and casein kinase substrate in neurons protein 2 (Fragment) OS=Homo sapiens	9	3	0	5	19	19	19	9	8	3	2	1	0	0	0	0	0	0	0	10	13	12	10	11	10	7	4	6	9	8	3	2	1	0	0	0	0	0	0	0	10	13
Q9Y5K6	Q9Y5K6	13	13	13	CD2-associated protein	CD2AP	sp|Q9Y5K6|CD2AP_HUMAN CD2-associated protein OS=Homo sapiens OX=9606 GN=CD2AP PE=1 SV=1	6	3	0	1	13	13	13	5	3	6	1	0	0	0	0	0	0	0	0	1	4	8	4	3	2	1	1	3	5	3	6	1	0	0	0	0	0	0	0	0	1	4
[truncated: 134 more columns]

## Sheet: mock
Protein IDs	Majority protein IDs	Peptide counts (all)	Peptide counts (razor+unique)	Peptide counts (unique)	Protein names	Gene names	Fasta headers	count_WT	count_dG-patch	count_mock	Number of proteins	Peptides	Razor + unique peptides	Unique peptides	Peptides dG-patch_1-1	Peptides dG-patch_1-2	Peptides dG-patch_1-3	Peptides dG-patch_2-1	Peptides dG-patch_2-2	Peptides dG-patch_2-3	Peptides dG-patch_3-1	Peptides dG-patch_3-2	Peptides dG-patch_3-3	Peptides mock_1	Peptides mock_2	Peptides mock_3	Peptides WT_1-1	Peptides WT_1-2	Peptides WT_1-3	Peptides WT_2-1	Peptides WT_2-2	Peptides WT_2-3	Peptides WT_3-1	Peptides WT_3-2	Peptides WT_3-3	Razor + unique peptides dG-patch_1-1	Razor + unique peptides dG-patch_1-2	Razor + unique peptides dG-patch_1-3	Razor + unique peptides dG-patch_2-1	Razor + unique peptides dG-patch_2-2	Razor + unique peptides dG-patch_2-3	Razor + unique peptides dG-patch_3-1	Razor + unique peptides dG-patch_3-2	Razor + unique peptides dG-patch_3-3	Razor + unique peptides mock_1	Razor + unique peptides mock_2	Razor + unique peptides mock_3	Razor + unique peptides WT_1-1	Razor + unique peptides WT_1-2
A0A087WVQ6;Q00610;J3KS13;A0A087WX41;P53675;K7EJJ5;J3KSQ2;J3QL20;F5H5N6	A0A087WVQ6;Q00610	28;28;10;5;5;3;2;1;1	28;28;10;5;5;3;2;1;1	28;28;10;5;5;3;2;1;1	Clathrin heavy chain;Clathrin heavy chain 1	CLTC	tr|A0A087WVQ6|A0A087WVQ6_HUMAN Clathrin heavy chain OS=Homo sapiens OX=9606 GN=CLTC PE=1 SV=1;sp|Q00610|CLH1_HUMAN Clathrin heavy chain 1 OS=Homo sapiens OX=9606 GN=CLTC PE=1 SV=5	9	7	3	9	28	28	28	9	8	3	5	5	7	5	0	0	3	3	10	7	8	15	9	4	3	5	5	3	9	8	3	5	5	7	5	0	0	3	3	10	7	8
A0A0G2JIW1;P0DMV9;P0DMV8;V9GZ37	A0A0G2JIW1;P0DMV9;P0DMV8;V9GZ37	44;44;44;28	44;44;44;28	27;27;27;17	Heat shock 70 kDa protein 1B;Heat shock 70 kDa protein 1A	HSPA1B;HSPA1A	tr|A0A0G2JIW1|A0A0G2JIW1_HUMAN Heat shock 70 kDa protein 1B OS=Homo sapiens OX=9606 GN=HSPA1B PE=1 SV=1;sp|P0DMV9|HS71B_HUMAN Heat shock 70 kDa protein 1B OS=Homo sapiens OX=9606 GN=HSPA1B PE=1 SV=1;sp|P0DMV8|HS71A_HUMAN Heat shock 70 kDa protein 1A OS=Hom	9	7	3	4	44	44	27	26	31	26	12	22	16	9	1	1	8	7	11	18	23	24	18	19	18	18	19	17	26	31	26	12	22	16	9	1	1	8	7	11	18	23
E9PP50;P23528;G3V1A4;E9PK25;E9PS23;E9PQB7;E9PLJ3;Q9Y281	E9PP50;P23528;G3V1A4;E9PK25;E9PS23;E9PQB7	6;6;4;4;3;3;2;2	6;6;4;4;3;3;2;2	6;6;4;4;3;3;2;2	Cofilin-1	CFL1	tr|E9PP50|E9PP50_HUMAN Cofilin, non-muscle isoform (Fragment) OS=Homo sapiens OX=9606 GN=CFL1 PE=1 SV=8;sp|P23528|COF1_HUMAN Cofilin-1 OS=Homo sapiens OX=9606 GN=CFL1 PE=1 SV=3;tr|G3V1A4|G3V1A4_HUMAN Cofilin, non-muscle isoform OS=Homo sapiens OX=9606 GN=C	7	4	2	8	6	6	6	2	4	1	2	1	2	1	0	0	2	2	1	3	5	2	2	2	2	2	0	2	2	4	1	2	1	2	1	0	0	2	2	1	3	5
F5GZS6;J3KPF3;P08195;F5H0E2;H0YFS2;F5H867;F5GZI0;F5GZR9;H0YFX4	F5GZS6;J3KPF3;P08195	17;17;17;6;6;4;4;2;2	17;17;17;6;6;4;4;2;2	17;17;17;6;6;4;4;2;2	4F2 cell-surface antigen heavy chain	SLC3A2	tr|F5GZS6|F5GZS6_HUMAN 4F2 cell-surface antigen heavy chain OS=Homo sapiens OX=9606 GN=SLC3A2 PE=1 SV=1;tr|J3KPF3|J3KPF3_HUMAN 4F2 cell-surface antigen heavy chain OS=Homo sapiens OX=9606 GN=SLC3A2 PE=1 SV=1;sp|P08195|4F2_HUMAN 4F2 cell-surface antigen hea	9	6	1	9	17	17	17	6	8	2	2	4	3	1	0	0	1	1	5	7	8	11	9	9	5	7	7	4	6	8	2	2	4	3	1	0	0	1	1	5	7	8
J3QS39;J3QTR3;F5H6Q2;F5GYU3;F5H2Z3;F5H265;B4DV12;F5H388;F5H747;F5GXK7;J3QKN0;Q5PY61;Q96C32;P62987;P62979;P0CG47;P0CG48;M0R1V7;Q49A90;M0R1M6;M0R2S1;A0A2R8Y422;F5GZ39;J3QSA3	J3QS39;J3QTR3;F5H6Q2;F5GYU3;F5H2Z3;F5H265;B4DV12;F5H388;F5H747;F5GXK7;J3QKN0;Q5PY61;Q96C32;P62987;P62979;P0CG47;P0CG48;M0R1V7;Q49A90;M0R1M6;M0R2S1;A0A2R8Y422;F5GZ39;J3QSA3	13;13;13;13;13;13;13;13;13;13;13;13;13;13;13;13;13;10;10;9;9;9;8;7	13;13;13;13;13;13;13;13;13;13;13;13;13;13;13;13;13;10;10;9;9;9;8;7	13;13;13;13;13;13;13;13;13;13;13;13;13;13;13;13;13;10;10;9;9;9;8;7	Ubiquitin-60S ribosomal protein L40;Ubiquitin;60S ribosomal protein L40;Ubiquitin-40S ribosomal protein S27a;Ubiquitin;40S ribosomal protein S27a;Polyubiquitin-B;Ubiquitin;Polyubiquitin-C;Ubiquitin	UBB;RPS27A;UBC;UBA52	tr|J3QS39|J3QS39_HUMAN Polyubiquitin-B (Fragment) OS=Homo sapiens OX=9606 GN=UBB PE=1 SV=1;tr|J3QTR3|J3QTR3_HUMAN Ubiquitin-40S ribosomal protein S27a (Fragment) OS=Homo sapiens OX=9606 GN=RPS27A PE=1 SV=1;tr|F5H6Q2|F5H6Q2_HUMAN Polyubiquitin-C (Fragment)	9	8	3	24	13	13	13	9	8	7	5	11	8	9	1	2	3	3	2	7	7	5	3	5	6	6	5	6	9	8	7	5	11	8	9	1	2	3	3	2	7	7
K7EMV3;A0A590UJJ6;B4DEB1;K7EK07;K7ES00;Q71DI3;Q16695;P84243;P68431;K7EP01;Q6NXT2	K7EMV3;A0A590UJJ6;B4DEB1;K7EK07;K7ES00;Q71DI3;Q16695;P84243;P68431;K7EP01;Q6NXT2	3;3;3;3;3;3;3;3;3;2;2	3;3;3;3;3;3;3;3;3;2;2	1;1;1;1;1;1;1;1;1;0;0	Histone H3;Histone H3.2;Histone H3.1t;Histone H3.3;Histone H3.1;Histone H3.3C	H3F3B;H3F3A;HIST2H3A;HIST3H3;HIST1H3A;H3F3C	tr|K7EMV3|K7EMV3_HUMAN Histone H3 OS=Homo sapiens OX=9606 GN=H3-3B PE=1 SV=1;tr|A0A590UJJ6|A0A590UJJ6_HUMAN Histone H3 OS=Homo sapiens OX=9606 GN=H3-3A PE=1 SV=1;tr|B4DEB1|B4DEB1_HUMAN Histone H3 OS=Homo sapiens OX=9606 GN=H3-3A PE=1 SV=1;tr|K7EK07|K7EK07_	1	3	3	11	3	3	1	1	2	1	2	2	1	1	1	0	3	2	3	0	0	0	1	0	0	1	2	1	1	2	1	2	2	1	1	1	0	3	2	3	0	0
O00560;B4DHN5;E9PBU7	O00560;B4DHN5;E9PBU7	16;9;9	16;9;9	3;2;2	Syntenin-1	SDCBP	sp|O00560|SDCB1_HUMAN Syntenin-1 OS=Homo sapiens OX=9606 GN=SDCBP PE=1 SV=1;tr|B4DHN5|B4DHN5_HUMAN Syntenin-1 OS=Homo sapiens OX=9606 GN=SDCBP PE=1 SV=1;tr|E9PBU7|E9PBU7_HUMAN Syntenin-1 OS=Homo sapiens OX=9606 GN=SDCBP PE=1 SV=1	9	7	3	3	16	16	3	6	6	3	3	3	2	3	1	0	4	3	4	7	7	8	6	5	5	6	8	7	6	6	3	3	3	2	3	1	0	4	3	4	7	7
P00742	P00742	4	4	4	Coagulation factor X;Factor X light chain;Factor X heavy chain;Activated factor Xa heavy chain	F10	sp|P00742|FA10_HUMAN Coagulation factor X OS=Homo sapiens OX=9606 GN=F10 PE=1 SV=2	8	4	1	1	4	4	4	1	2	2	2	2	0	2	1	1	1	0	3	3	4	3	3	2	2	1	2	3	1	2	2	2	2	0	2	1	1	1	0	3	3	4
P02786;G3V0E5;F8WBE5;H7C3V5	P02786;G3V0E5	9;7;2;1	9;7;2;1	9;7;2;1	Transferrin receptor protein 1;Transferrin receptor protein 1, serum form	TFRC	sp|P02786|TFR1_HUMAN Transferrin receptor protein 1 OS=Homo sapiens OX=9606 GN=TFRC PE=1 SV=2;tr|G3V0E5|G3V0E5_HUMAN Transferrin receptor protein 1 OS=Homo sapiens OX=9606 GN=TFRC PE=1 SV=1	7	7	1	4	9	9	9	4	2	2	2	3	3	4	0	0	1	1	3	3	5	3	4	4	3	3	1	1	4	2	2	2	3	3	4	0	0	1	1	3	3	5
P04406;E7EUT5	P04406;E7EUT5	6;5	6;5	6;5	Glyceraldehyde-3-phosphate dehydrogenase	GAPDH	sp|P04406|G3P_HUMAN Glyceraldehyde-3-phosphate dehydrogenase OS=Homo sapiens OX=9606 GN=GAPDH PE=1 SV=3;tr|E7EUT5|E7EUT5_HUMAN Glyceraldehyde-3-phosphate dehydrogenase OS=Homo sapiens OX=9606 GN=GAPDH PE=1 SV=1	7	5	2	2	6	6	6	3	2	2	3	2	0	1	0	0	2	1	3	2	2	4	5	3	2	3	2	2	3	2	2	3	2	0	1	0	0	2	1	3	2	2
P05023;M0R116;A0A2R8YEY8;A0A0A0MT26;P13637;B1AKY9;P50993;H0Y7C1;Q13733;Q5TC01;E9PRA5;Q5TC02;A0A669K9X0;M0QXF2;P20648;P54707	P05023	29;12;12;12;12;10;10;8;6;4;4;3;3;2;2;2	29;12;12;12;12;10;10;8;6;4;4;3;3;2;2;2	29;12;12;12;12;10;10;8;6;4;4;3;3;2;2;2	Sodium/potassium-transporting ATPase subunit alpha-1	ATP1A1	sp|P05023|AT1A1_HUMAN Sodium/potassium-transporting ATPase subunit alpha-1 OS=Homo sapiens OX=9606 GN=ATP1A1 PE=1 SV=1	9	7	3	16	29	29	29	10	14	11	10	11	11	8	0	1	7	7	8	9	10	16	13	12	9	12	9	4	10	14	11	10	11	11	8	0	1	7	7	8	9	10
P06733;A0A2R8Y6G6;K7ERS8;A0A2R8Y879;A0A2R8YEM5;K7EM90;A0A2R8Y798;A0A2R8YEG5;A0A2R8Y6I8;F5H1C3;E5RI09;E5RG95;K7EPM1;K7EKN2;E5RGZ4;F5H0C8;P13929;P09104	P06733;A0A2R8Y6G6	12;11;5;5;5;5;4;4;1;1;1;1;1;1;1;1;1;1	12;11;5;5;5;5;4;4;1;1;1;1;1;1;1;1;1;1	12;11;5;5;5;5;4;4;1;1;1;1;1;1;1;1;1;1	Alpha-enolase	ENO1	sp|P06733|ENOA_HUMAN Alpha-enolase OS=Homo sapiens OX=9606 GN=ENO1 PE=1 SV=2;tr|A0A2R8Y6G6|A0A2R8Y6G6_HUMAN 2-phospho-D-glycerate hydro-lyase OS=Homo sapiens OX=9606 GN=ENO1 PE=1 SV=1	6	4	1	18	12	12	12	4	5	3	4	3	0	2	0	0	0	2	2	1	3	4	2	2	2	2	1	1	4	5	3	4	3	0	2	0	0	0	2	2	1	3
P07572;E9PGM3	P07572;E9PGM3	109;72	109;72	52;16		DEPDC4	sp|P07572|POL_MPMV Gag-Pro-Pol polyprotein OS=Mason-Pfizer monkey virus OX=11855 GN=gag-pro-pol PE=1 SV=2;tr|E9PGM3|E9PGM3_HUMAN DEP domain-containing protein 4 (Fragment) OS=Homo sapiens OX=9606 GN=DEPDC4 PE=4 SV=2	9	8	2	2	109	109	52	56	58	42	22	37	23	26	4	1	9	5	0	66	77	76	67	61	66	56	59	48	56	58	42	22	37	23	26	4	1	9	5	0	66	77
P08238;Q58FF7;F8W026;Q96GW1;A0A1W2PRR1	P08238	21;8;1;1;1	21;8;1;1;1	12;4;0;0;0	Heat shock protein HSP 90-beta	HSP90AB1	sp|P08238|HS90B_HUMAN Heat shock protein HSP 90-beta OS=Homo sapiens OX=9606 GN=HSP90AB1 PE=1 SV=4	9	7	2	5	21	21	12	9	8	4	3	8	4	3	0	0	4	1	6	7	13	15	11	12	8	9	6	6	9	8	4	3	8	4	3	0	0	4	1	6	7	13
P09874;Q5VX84;Q5VX85	P09874	16;1;1	16;1;1	16;1;1	Poly [ADP-ribose] polymerase 1	PARP1	sp|P09874|PARP1_HUMAN Poly [ADP-ribose] polymerase 1 OS=Homo sapiens OX=9606 GN=PARP1 PE=1 SV=4	1	4	2	3	16	16	16	3	2	1	1	2	0	2	0	0	5	0	14	1	1	3	0	0	1	1	1	0	3	2	1	1	2	0	2	0	0	5	0	14	1	1
P11142;E9PKE3;E9PNE6;A8K7Q2;E9PLF4;E9PQQ4;E9PQK7;E9PK54;E9PPY6;E9PI65;P54652;E9PN25;E9PS65;E9PM13	P11142;E9PKE3;E9PNE6;A8K7Q2	44;42;31;24;17;16;16;16;13;13;12;11;10;7	41;39;28;23;15;14;14;14;11;11;9;9;9;6	15;15;15;11;4;4;4;4;4;2;0;4;9;6	Heat shock cognate 71 kDa protein	HSPA8	sp|P11142|HSP7C_HUMAN Heat shock cognate 71 kDa protein OS=Homo sapiens OX=9606 GN=HSPA8 PE=1 SV=1;tr|E9PKE3|E9PKE3_HUMAN Heat shock cognate 71 kDa protein OS=Homo sapiens OX=9606 GN=HSPA8 PE=1 SV=1;tr|E9PNE6|E9PNE6_HUMAN Heat shock cognate 71 kDa protein	9	7	3	14	44	41	15	25	27	26	18	22	14	15	0	2	8	8	15	22	23	26	22	24	23	20	19	17	24	26	24	18	20	13	14	0	1	7	7	14	21	22
P26038;V9GZ54	P26038	10;3	10;3	6;2	Moesin	MSN	sp|P26038|MOES_HUMAN Moesin OS=Homo sapiens OX=9606 GN=MSN PE=1 SV=3	5	4	1	2	10	10	6	3	6	1	1	2	2	1	0	0	1	2	4	1	2	2	2	2	1	2	1	1	3	6	1	1	2	2	1	0	0	1	2	4	1	2
P35613;A0A087WUV8;A0A087X2B5;I3L192;R4GMX5;R4GN83;A0A2R8YDZ0	P35613;A0A087WUV8;A0A087X2B5;I3L192	7;6;6;4;3;2;1	7;6;6;4;3;2;1	7;6;6;4;3;2;1	Basigin	BSG	sp|P35613|BASI_HUMAN Basigin OS=Homo sapiens OX=9606 GN=BSG PE=1 SV=2;tr|A0A087WUV8|A0A087WUV8_HUMAN Basigin OS=Homo sapiens OX=9606 GN=BSG PE=1 SV=1;tr|A0A087X2B5|A0A087X2B5_HUMAN Basigin (Fragment) OS=Homo sapiens OX=9606 GN=BSG PE=1 SV=1;tr|I3L192|I3L19	9	7	2	7	7	7	7	4	4	5	4	3	3	2	1	0	1	2	4	5	6	7	6	6	5	7	6	5	4	4	5	4	3	3	2	1	0	1	2	4	5	6
P50995;H0Y6E1	P50995	9;3	9;3	9;3	Annexin A11	ANXA11	sp|P50995|ANX11_HUMAN Annexin A11 OS=Homo sapiens OX=9606 GN=ANXA11 PE=1 SV=1	4	2	2	2	9	9	9	3	3	1	1	1	0	0	0	0	2	2	3	2	4	4	1	1	0	2	2	0	3	3	1	1	1	0	0	0	0	2	2	3	2	4
P63000;P15153;B1AH77;B1AH80;B1AH78	P63000;P15153	10;5;4;4;3	10;5;4;4;3	5;1;1;1;1	Ras-related C3 botulinum toxin substrate 1;Ras-related C3 botulinum toxin substrate 2	RAC1;RAC2	sp|P63000|RAC1_HUMAN Ras-related C3 botulinum toxin substrate 1 OS=Homo sapiens OX=9606 GN=RAC1 PE=1 SV=1;sp|P15153|RAC2_HUMAN Ras-related C3 botulinum toxin substrate 2 OS=Homo sapiens OX=9606 GN=RAC2 PE=1 SV=1	7	5	1	5	10	10	5	6	5	1	2	2	1	2	1	1	1	1	2	3	4	5	6	6	4	2	3	1	6	5	1	2	2	1	2	1	1	1	1	2	3	4
P63261;I3L3I0;I3L1U9;I3L3R2;J3KT65;I3L4N8;K7EM38	P63261;I3L3I0;I3L1U9;I3L3R2;J3KT65;I3L4N8	24;16;16;12;12;12;11	24;16;16;12;12;12;11	1;1;1;1;1;1;1	Actin, cytoplasmic 2;Actin, cytoplasmic 2, N-terminally processed	ACTG1	sp|P63261|ACTG_HUMAN Actin, cytoplasmic 2 OS=Homo sapiens OX=9606 GN=ACTG1 PE=1 SV=1;tr|I3L3I0|I3L3I0_HUMAN Actin, cytoplasmic 2 (Fragment) OS=Homo sapiens OX=9606 GN=ACTG1 PE=1 SV=1;tr|I3L1U9|I3L1U9_HUMAN Actin, cytoplasmic 2 (Fragment) OS=Homo sapiens OX	9	9	3	7	24	24	1	13	12	11	6	12	5	7	3	5	5	6	6	10	10	11	10	11	9	7	8	9	13	12	11	6	12	5	7	3	5	5	6	6	10	10
P68363;F8VVB9;F8VQQ4;F8VRZ4;F8VS66;F8VX09;F8VWV9;F8VRK0;C9K0S6;F8W0F6;F8VXZ7;A6NHL2	P68363;F8VVB9;F8VQQ4	15;9;8;7;7;6;6;4;2;2;1;1	15;9;8;7;7;6;6;4;2;2;1;1	0;0;0;0;0;0;0;0;0;0;0;0	Tubulin alpha-1B chain	TUBA1B;TUBA1A	sp|P68363|TBA1B_HUMAN Tubulin alpha-1B chain OS=Homo sapiens OX=9606 GN=TUBA1B PE=1 SV=1;tr|F8VVB9|F8VVB9_HUMAN Tubulin alpha-1B chain (Fragment) OS=Homo sapiens OX=9606 GN=TUBA1B PE=1 SV=8;tr|F8VQQ4|F8VQQ4_HUMAN Tubulin alpha chain (Fragment) OS=Homo sapi	9	7	1	12	15	15	0	7	7	8	2	6	5	4	0	0	1	1	8	6	9	10	9	5	5	4	6	4	7	7	8	2	6	5	4	0	0	1	1	8	6	9
P68366;C9JEV8;C9JQ00;C9JJQ8;C9JDL2	P68366	14;6;6;6;5	5;4;4;4;3	5;4;4;4;3	Tubulin alpha-4A chain	TUBA4A	sp|P68366|TBA4A_HUMAN Tubulin alpha-4A chain OS=Homo sapiens OX=9606 GN=TUBA4A PE=1 SV=1	3	3	1	5	14	5	5	7	7	6	3	7	4	5	0	0	1	1	7	6	10	11	6	5	4	3	6	3	2	3	1	1	3	0	1	0	0	0	0	2	2	3
Q08431;H0YKS8;A0A087WUV5	Q08431;H0YKS8	16;10;3	16;10;3	16;10;3	Lactadherin;Lactadherin short form;Medin	MFGE8	sp|Q08431|MFGM_HUMAN Lactadherin OS=Homo sapiens OX=9606 GN=MFGE8 PE=1 SV=3;tr|H0YKS8|H0YKS8_HUMAN Lactadherin (Fragment) OS=Homo sapiens OX=9606 GN=MFGE8 PE=1 SV=1	9	5	2	3	16	16	16	7	8	5	3	5	1	2	0	0	4	2	6	7	9	8	5	6	3	5	5	5	7	8	5	3	5	1	2	0	0	4	2	6	7	9
Q15758;M0QXM4;M0QX44;M0R144	Q15758;M0QXM4	13;9;3;2	13;9;3;2	13;9;3;2	Neutral amino acid transporter B(0);Amino acid transporter	SLC1A5	sp|Q15758|AAAT_HUMAN Neutral amino acid transporter B(0) OS=Homo sapiens OX=9606 GN=SLC1A5 PE=1 SV=2;tr|M0QXM4|M0QXM4_HUMAN Amino acid transporter OS=Homo sapiens OX=9606 GN=SLC1A5 PE=1 SV=1	9	5	1	4	13	13	13	7	6	4	1	3	3	1	0	0	1	1	3	7	7	7	5	5	6	6	6	6	7	6	4	1	3	3	1	0	0	1	1	3	7	7
Q5VTE0;P68104;A0A087WVQ9;A0A087WV01;A0A2U3TZH3;Q05639;A6PW80;Q5JR01;A0A2R8Y660;A0A2R8Y488;A0A2R8YDN5	Q5VTE0;P68104;A0A087WVQ9;A0A087WV01;A0A2U3TZH3;Q05639	6;6;5;4;3;3;2;2;2;2;1	6;6;5;4;3;3;2;2;2;2;1	6;6;5;4;3;3;2;2;2;2;1	Putative elongation factor 1-alpha-like 3;Elongation factor 1-alpha 1;Elongation factor 1-alpha;Elongation factor 1-alpha 2	EEF1A1P5;EEF1A1;EEF1A2	sp|Q5VTE0|EF1A3_HUMAN Putative elongation factor 1-alpha-like 3 OS=Homo sapiens OX=9606 GN=EEF1A1P5 PE=5 SV=1;sp|P68104|EF1A1_HUMAN Elongation factor 1-alpha 1 OS=Homo sapiens OX=9606 GN=EEF1A1 PE=1 SV=1;tr|A0A087WVQ9|A0A087WVQ9_HUMAN Elongation factor 1-a	8	3	1	11	6	6	6	2	3	1	1	2	1	1	0	0	1	1	3	3	3	4	3	2	3	3	2	0	2	3	1	1	2	1	1	0	0	1	1	3	3	3
Q8WUM4;A0A3B3IT07;C9IZF9;F8WEQ7;F8WBR8;F8WDK9	Q8WUM4	68;16;11;8;8;6	68;16;11;8;8;6	68;16;11;8;8;6	Programmed cell death 6-interacting protein	PDCD6IP	sp|Q8WUM4|PDC6I_HUMAN Programmed cell death 6-interacting protein OS=Homo sapiens OX=9606 GN=PDCD6IP PE=1 SV=1	9	8	3	6	68	68	68	29	40	27	21	32	23	18	2	1	3	3	5	32	38	40	35	30	29	31	31	26	29	40	27	21	32	23	18	2	1	3	3	5	32	38
Q969P0;C9J8Z4	Q969P0;C9J8Z4	17;12	17;12	17;12	Immunoglobulin superfamily member 8	IGSF8	sp|Q969P0|IGSF8_HUMAN Immunoglobulin superfamily member 8 OS=Homo sapiens OX=9606 GN=IGSF8 PE=1 SV=1;tr|C9J8Z4|C9J8Z4_HUMAN Immunoglobulin superfamily member 8 (Fragment) OS=Homo sapiens OX=9606 GN=IGSF8 PE=1 SV=1	9	7	1	2	17	17	17	9	11	5	8	5	4	3	0	0	0	0	2	8	6	12	11	8	7	8	8	5	9	11	5	8	5	4	3	0	0	0	0	2	8	6
[truncated: 134 more columns]

## Sheet: dG-patch_to_WT
Significant	=-LOG(P-value)	Difference	Protein IDs	Majority protein IDs	Protein names	Gene names	count_WT	count_dG-patch	Peptides	Razor + unique peptides	Unique peptides	Sequence coverage [%]	Unique + razor sequence coverage [%]	Unique sequence coverage [%]	Mol. weight [kDa]	Q-value	Score	Intensity	MS/MS count	LFQ intensity dG-patch_1-1	LFQ intensity dG-patch_1-2	LFQ intensity dG-patch_1-3	LFQ intensity dG-patch_2-1	LFQ intensity dG-patch_2-2	LFQ intensity dG-patch_2-3	LFQ intensity dG-patch_3-1	LFQ intensity dG-patch_3-2	LFQ intensity dG-patch_3-3	LFQ intensity mock_1	LFQ intensity mock_2	LFQ intensity mock_3	LFQ intensity WT_1-1	LFQ intensity WT_1-2	LFQ intensity WT_1-3	LFQ intensity WT_2-1	LFQ intensity WT_2-2	LFQ intensity WT_2-3	LFQ intensity WT_3-1	LFQ intensity WT_3-2	LFQ intensity WT_3-3
	0.771751	-0.974458	A0A024R571;Q9H4M9;C9JC03;C9J2Z4;C9JDQ8;C9JIJ3;C9IZH1	A0A024R571;Q9H4M9;C9JC03;C9J2Z4	EH domain-containing protein 1	EHD1	8	2	17	15	9	36.1	32.5	21	61.927	0	122.59	3103400	53	14.9833	15.3696	13.219	13.5312	10.9308	13.2349	12.9399	14.8616	14.9468	13.9818	13.6878	11.4408	15.1991	15.1935	15.3369	15.1701	15.2255	15.0056	10.8908	15.2085	15.5573
	0.78311	0.967152	A0A087WT15;A0A096LP10	A0A087WT15;A0A096LP10		ALG13	1	0	1	1	1	11.5	11.5	11.5	6.878	0	15.403	334610	1	12.0726	10.2227	13.9222	14.6636	13.4948	13.8541	12.1127	14.858	14.5694	13.7464	13.3345	10.6925	12.6851	12.0901	10.7911	10.9111	12.0835	12.3462	15.1614	12.6727	12.3246
	1.34104	1.48742	A0A087WTA8;P08123	A0A087WTA8;P08123	Collagen alpha-2(I) chain	COL1A2	0	1	1	1	1	1.3	1.3	1.3	129.15	0	9.0468	43978	1	11.1718	11.0412	14.3912	14.6217	12.5107	14.1651	13.5932	15.0273	16.3466	13.3958	14.2303	12.8938	12.0365	11.6125	11.1265	10.663	11.945	12.2511	12.9036	12.7486	14.1953
	1.23708	1.17926	A0A087WTS8;D6RJ96;A0A087WYC1;A0A0A0MSM0;E9PDE8;O95757;P34932;Q92598	A0A087WTS8;D6RJ96;A0A087WYC1;A0A0A0MSM0;E9PDE8;O95757;P34932;Q92598	Heat shock 70 kDa protein 4L;Heat shock 70 kDa protein 4;Heat shock protein 105 kDa	HSPA4;HSPA4L;HSPH1	0	1	1	1	1	2.9	2.9	2.9	52.599	0	12.333	164530	3	11.0864	11.277	12.5092	14.5302	12.9354	12.5779	12.7049	15.5786	15.4318	13.6016	14.3026	13.1451	11.938	12.1641	12.0705	10.9933	12.9313	12.2291	11.657	11.7323	12.3025
	1.46042	-0.944514	A0A087WTT1;P11940;E7EQV3;E7ERJ7;H0YAR2;E5RGH3;E5RJB9;Q9H361;H0YBN4;E5RH24;H0YB86;E5RHG7;H0YEQ8;H0YAP2;Q4VXU2;E5RGC4;E5RFD8;A0A6I8PS38;A0A6I8PLA1;Q5JQF8	A0A087WTT1;P11940;E7EQV3;E7ERJ7;H0YAR2	Polyadenylate-binding protein;Polyadenylate-binding protein 1	PABPC1	9	5	13	13	6	25.7	25.7	12.8	58.535	0	205.92	8751300	81	16.7858	16.0498	16.1384	13.968	16.2213	15.8893	13.136	15.1542	14.5886	13.6714	14.2356	11.0065	16.5153	16.5166	16.4783	16.1767	16.414	16.0594	16.1478	16.2392	15.8847
	0.850411	0.954108	A0A087WUA0;P02671	A0A087WUA0;P02671	Fibrinogen alpha chain;Fibrinopeptide A;Fibrinogen alpha chain	FGA	0	1	1	1	1	4.8	4.8	4.8	33.005	0.0020704	6.9086	50572	4	11.4955	11.1338	14.5241	12.7647	12.3023	12.6362	11.4659	15.1678	15.6825	14.1935	13.0754	11.2176	12.4031	10.7994	11.3735	11.9272	12.7965	12.4613	11.4496	12.3025	13.0727
	0.334949	-0.405932	A0A087WVF7;Q9NZM3;E7EPJ2;H7BZD4	A0A087WVF7;Q9NZM3	Intersectin-2	ITSN2	8	4	22	20	20	17.3	15.9	15.9	191.6	0	168.26	4589300	72	15.7163	15.51	15.945	12.795	12.3464	14.4459	15.5181	15.1819	15.0837	13.4493	14.3927	11.7703	15.4506	15.3699	15.6588	15.4257	15.0919	14.9514	15.8939	15.6687	12.6845
	0.943896	0.711418	A0A087WWF8;F8VV13;Q96DR8	A0A087WWF8;F8VV13;Q96DR8	Mucin-like protein 1	MUCL1	1	0	1	1	1	11.2	11.2	11.2	8.2082	0.0020833	7.0209	85239	3	12.4205	11.3563	14.2945	12.8732	12.3427	13.7617	14.2387	15.031	13.7744	15.1112	13.9811	12.061	12.2764	11.4604	12.9078	12.8842	12.4875	13.0481	12.9099	13.0472	12.6687
+	4.62662	3.02383	A0A087WWY3;Q60FE5;P21333;F8WE98;A0A669KBC6;O75369;Q14315	A0A087WWY3;Q60FE5;P21333	Filamin-A	FLNA	0	5	13	13	13	8.3	8.3	8.3	245.85	0	121.12	3037300	29	15.4687	15.2363	15.0747	15.9768	12.4499	14.3208	17.7502	15.5408	14.0468	14.2934	14.7629	11.703	12.3873	12.2485	10.9686	11.5956	12.2797	12.5526	11.9625	11.9954	12.6602
	0.0198775	0.043512	A0A087WY55;Q9NP79;Q5TGM0	A0A087WY55;Q9NP79;Q5TGM0	Vacuolar protein sorting-associated protein VTA1 homolog	VTA1	9	6	7	7	7	36.8	36.8	36.8	31.102	0	323.31	18833000	152	18.4522	18.0665	18.7862	11.8817	17.8175	17.8966	16.6147	14.9806	14.7969	13.3178	14.174	13.4646	16.4819	16.7982	16.5726	16.5081	16.284	16.3173	16.406	16.8394	16.6937
	1.15236	-1.14036	A0A087WY71;E9PFW3;Q96CW1;C9JJ47;C9JTK4;C9JGT8;C9JJD3;C9JPV8;H7C4C3	A0A087WY71;E9PFW3;Q96CW1;C9JJ47	AP-2 complex subunit mu	AP2M1	8	3	11	11	11	30	30	30	49.526	0	111.13	5067800	44	15.9082	15.8253	12.7953	12.7213	11.9666	15.5147	12.5141	14.2399	14.614	13.4191	14.5921	10.8371	15.2628	15.5244	15.3668	15.173	15.6343	15.3415	15.5163	15.6205	12.923
	0.0935387	-0.15297	A0A087WY82;Q9Y624	A0A087WY82;Q9Y624	Junctional adhesion molecule A	F11R	4	0	7	7	7	35.5	35.5	35.5	30.197	0	48.562	1164800	24	10.6041	11.5362	14.0597	12.9808	12.9259	13.1611	11.5823	15.1809	14.59	13.4794	13.8885	11.3651	11.9568	14.2377	13.8412	12.1229	14.0131	12.5093	12.7471	14.568	12.0017
	1.51579	1.40275	A0A087X0S5;P12109	A0A087X0S5;P12109	Collagen alpha-1(VI) chain	COL6A1	0	1	1	1	1	1.6	1.6	1.6	108.34	0	8.1761	463660	4	11.5007	10.7522	12.4634	13.0761	13.678	14.0222	14.944	14.9814	15.5238	13.8301	14.6172	12.5016	12.5827	11.4239	10.9546	11.5043	11.6088	12.155	12.5153	12.6682	12.9041
	0.55832	0.612792	A0A087X243;P09211	A0A087X243;P09211	Glutathione S-transferase P	GSTP1	0	1	1	1	1	29	29	29	7.4493	0.002045	6.8261	58129	1	11.9723	10.1608	13.2812	13.4474	12.7198	13.6277	12.3714	14.085	14.8406	14.1085	13.9392	12.514	12.0531	10.7102	12.9232	11.7519	12.3709	12.0743	12.6176	12.4431	14.0468
	0.81845	0.834771	A0A087X295;Q9NNW5;E5RFX3;F8WE36;C9K020;E9PBK6;E9PDU5	A0A087X295;Q9NNW5;E5RFX3;F8WE36;C9K020;E9PBK6;E9PDU5	WD repeat-containing protein 6	WDR6	0	1	2	2	2	4.6	4.6	4.6	125	0	11.666	82784	2	12.4824	10.2992	13.2638	13.0156	11.7862	12.613	12.8632	15.5772	14.5354	13.8947	14.1283	12.2974	12.3962	11.618	10.4765	12.3939	12.4528	12.0806	12.0781	12.6701	12.7568
+	2.96346	1.79887	A0A0A0MSQ0;P13797;P13796;Q14651;U3KQI3;H7C4N2;Q5TBN3;C9JAM8	A0A0A0MSQ0;P13797;P13796;Q14651	Plastin-3;Plastin-2;Plastin-1	PLS3;LCP1;PLS1	0	2	4	4	4	8.1	8.1	8.1	69.334	0	43.971	1637200	14	15.6319	15.4402	14.3	14.0534	12.3947	13.2594	12.088	14.2834	14.1489	14.6642	14.5058	11.166	12.7957	11.7783	10.9413	12.4321	12.4015	11.8481	11.8748	12.9734	12.365
	0.643637	-0.80898	A0A0C4DGH0;Q5ZPR3;H0YL10;H0YK40;H0YK59;H0YLT8;H0YN85;H0YN29	A0A0C4DGH0;Q5ZPR3;H0YL10	CD276 antigen	CD276	7	0	5	5	5	25.8	25.8	25.8	41.767	0	63.959	1741200	22	11.497	10.6462	13.6579	13.6423	12.9321	13.4086	13.511	14.7049	14.7396	13.8582	13.8115	12.0713	14.553	14.9628	14.8182	14.525	12.1854	14.6926	14.5057	14.6951	11.0828
	0.7306	0.812561	A0A0C4DGP3;D3DX46;Q13368	A0A0C4DGP3;D3DX46;Q13368	MAGUK p55 subfamily member 3	MPP3	1	0	1	1	1	3.8	3.8	3.8	35.558	0	9.6464	1686400	3	11.9179	10.9294	12.7924	12.5396	12.7119	14.7769	12.953	14.846	14.9875	13.789	14.6604	11.9713	11.1197	11.3328	13.1258	10.8678	12.419	12.5423	12.7623	14.0649	12.907
	1.41743	1.02451	A0A0G2JMZ8;Q16625	A0A0G2JMZ8;Q16625	Occludin	OCLN	0	1	1	1	1	4.6	4.6	4.6	59.129	0	8.4323	169570	2	11.3248	12.7113	14.3532	12.1868	12.5979	12.6797	12.8822	15.3131	14.7276	14.4111	13.723	11.6306	12.1081	12.1946	11.9998	11.9802	12.5127	12.9698	11.5949	12.1517	12.0442
	0.73466	0.878385	A0A0U1RQQ4;Q9UNN8	A0A0U1RQQ4;Q9UNN8	Endothelial protein C receptor	PROCR	1	0	2	2	2	12.2	12.2	12.2	24.284	0	12.727	289750	10	10.6886	10.6751	12.2385	14.04	12.8886	13.2901	13.5412	15.182	14.2025	14.0682	13.9696	12.1136	11.4623	12.1053	11.3328	11.9078	10.3251	11.7985	12.4548	14.0007	13.4538
	1.2745	1.15854	A0A0U1RQT9;C9JYN0;Q16563	A0A0U1RQT9;C9JYN0;Q16563	Synaptophysin-like protein 1	SYPL1	1	0	1	1	1	8.1	8.1	8.1	14.967	0	8.9354	198090	7	11.2882	10.9271	12.6795	12.2545	12.356	13.965	12.9298	14.7506	15.7402	14.9386	14.1827	10.6967	11.2706	11.4881	11.2096	11.663	12.4776	11.3376	12.4905	12.4091	12.118
	2.05365	2.4658	A0A0U1RR32;A0A0U1RRH7;Q99878;Q96KK5;Q9BTM1;Q16777;Q6FI13;P20671;P0C0S8;H0YFX9;A0A3B3IS11;Q96QV6;P16104;C9J0D1;A0A494C189;Q71UI9;P0C0S5;C9J386;Q8IUE6	A0A0U1RR32;A0A0U1RRH7;Q99878;Q96KK5;Q9BTM1;Q16777;Q6FI13;P20671;P0C0S8;H0YFX9;A0A3B3IS11;Q96QV6;P16104	Histone H2A type 1-J;Histone H2A type 1-H;Histone H2A.J;Histone H2A type 2-C;Histone H2A type 2-A;Histone H2A type 1-D;Histone H2A type 1;Histone H2A;Histone H2A type 1-A;Histone H2AX	HIST1H2AJ;HIST1H2AH;H2AFJ;HIST2H2AC;HIST2H2AA3;HIST1H2AD;HIST1H2AG;HIST1H2AA;H2AFX	2	4	5	5	1	27.2	27.2	6.5	18.481	0	186.85	14820000	44	18.0001	17.9055	13.6851	13.1942	16.0328	13.8455	13.2336	15.1139	17.5502	14.3497	13.8902	11.9577	12.3569	11.5121	13.8693	11.8019	12.7421	11.6036	12.9414	16.0291	13.5125
+	4.48778	2.08234	A0A140T955;A0A140T933;A0A1W2PPQ2;A0A1W2PRT9;Q53Z42;A0A140T9I0;A0A140T9X5;A0A140T913	A0A140T955;A0A140T933;A0A1W2PPQ2;A0A1W2PRT9;Q53Z42;A0A140T9I0;A0A140T9X5;A0A140T913		HLA-A	1	5	4	4	1	22.7	22.7	5.7	34.288	0	113.98	1571500	26	14.3352	14.2906	12.7706	14.9414	14.7612	13.9916	14.4033	14.6073	14.6561	13.853	13.546	11.4758	11.9934	11.2968	14.4142	11.6764	12.0947	12.1304	11.8007	12.4963	12.1135
	0.328934	-0.402257	A0A1W2PPR8;P01889;F6U0H7;Q5SS57;A0A140TA21;A0A140TA05;A0A140T951;A0A1W2PNZ7;A0A140T9D4;A0A140T9L3;A0A140T9E1;A0A140T942;A0A140T9W2;Q53YP1;A0A140T9U0;A0A140T9M0;P13747;F8W9Z8;A0A140TA12;A0A140T9Z7;A0A140T9X6;A0A140T9W7;A0A140T9W3;A0A140T9D9;A0A140T9C2;A0A140T939;A0A140T9S9;A0A140T9H3;A0A140T9G0;A0A140T9A9;Q31611;A0A0G2JNX1;A0A140T9T1;A0A140T9V0;A0A140T8X0;Q8MH48;Q5RJ85;A0A0G2JPQ3;D0EV57;A0A0G2JPA3…	A0A1W2PPR8;P01889;F6U0H7;Q5SS57	HLA class I histocompatibility antigen, B-7 alpha chain	HLA-B	6	0	5	5	1	18.7	18.7	3.3	40.687	0	44.567	982860	20	12.0647	11.2039	11.9997	13.0474	12.2278	13.4697	12.5813	15.6351	14.8048	13.6442	13.5164	11.3114	13.8267	13.8738	13.8183	13.7202	13.8106	12.5358	11.7269	14.0731	13.2692
	0.385357	0.506476	A0A2R8Y484;Q08722	A0A2R8Y484;Q08722	Leukocyte surface antigen CD47	CD47	2	0	2	2	2	10.9	10.9	10.9	20.313	0	12.012	559160	7	12.152	11.0733	13.7419	13.0542	13.5388	12.8982	12.2903	14.7508	15.0879	13.5916	14.4545	12.4276	12.2608	11.9154	14.6789	10.8874	12.6052	14.6609	12.1664	11.8036	13.0506
	1.98681	1.39417	A0A2R8Y5U1;Q76L82;Q8IXJ9	A0A2R8Y5U1;Q76L82;Q8IXJ9	Putative Polycomb group protein ASXL1	ASXH1;ASXL1	0	1	1	1	1	1.1	1.1	1.1	159.19	0	7.6928	474300	1	11.6884	15.1806	13.3336	12.7113	13.2174	13.5604	13.204	14.4928	14.6155	13.9808	15.0361	11.5597	12.6664	10.7928	10.6799	12.1184	13.2019	12.0128	13.4883	12.5917	11.9042
	2.00161	1.71415	A0A2R8Y7M3;A0A2R8Y5S7;P35241;E9PNV3;A0A2R8Y5P0;E9PQ82	A0A2R8Y7M3;A0A2R8Y5S7;P35241;E9PNV3	Radixin	RDX	0	1	6	2	2	15.7	8.4	8.4	62.93	0	14.048	115150	4	12.5241	13.1382	13.5429	14.2002	12.3691	14.4254	11.7595	14.8946	15.738	13.7173	14.1862	11.4206	10.4793	10.9045	11.4007	10.4426	12.1273	13.4939	12.3329	12.4164	13.5669
+	2.60702	1.46324	A0A2R8Y804;A0A2R8Y543;A0A2R8Y5C3;A0A2R8Y750;A0A2R8Y5Z1;B4DGU4;A0A2R8YCH5;A0A2R8Y7Z0;A0A2R8Y5A3;P35222	A0A2R8Y804;A0A2R8Y543;A0A2R8Y5C3;A0A2R8Y750;A0A2R8Y5Z1;B4DGU4;A0A2R8YCH5;A0A2R8Y7Z0;A0A2R8Y5A3;P35222	Catenin beta-1	CTNNB1	0	1	1	1	1	2.6	2.6	2.6	77.206	0	8.3425	129660	1	13.1298	11.917	13.1465	13.5671	13.2572	14.2857	13.2347	15.3507	14.8295	13.6282	15.0121	11.7316	12.2958	11.7193	12.0736	11.4161	12.1129	13.5437	11.4321	12.5795	12.3756
	1.23113	0.901883	A0A2U3TZL8;H7BYN4;Q02241	A0A2U3TZL8;H7BYN4;Q02241	Kinesin-like protein;Kinesin-like protein KIF23	KIF23	1	0	1	1	1	1.6	1.6	1.6	92.682	0.0020619	6.8763	32345	1	11.3241	12.4102	13.1934	12.6984	12.9584	14.2769	11.5697	14.892	14.2985	13.5979	13.6095	11.3204	12.8328	12.2562	11.7788	11.394	12.1199	12.8638	12.1722	11.7015	12.3855
	0.331926	0.453654	A0A3B3IST1;B5MD23;O75954	A0A3B3IST1;B5MD23;O75954	Tetraspanin;Tetraspanin-9	TSPAN9	2	0	2	2	2	19.8	19.8	19.8	14.846	0	12.7	246030	6	10.4502	11.6181	12.4783	13.0796	12.2391	13.4433	13.0178	14.8812	15.293	14.005	14.4448	11.4613	14.0213	13.7052	11.5545	11.6048	12.6701	13.561	11.5771	11.7915	11.9323
	0.397239	-0.468761	A0A3B3ISW7;Q86VN1	A0A3B3ISW7;Q86VN1	Vacuolar protein-sorting-associated protein 36	VPS36	5	0	5	5	5	20.7	20.7	20.7	36.751	0	47.654	994790	30	11.1441	11.4033	12.8419	13.8115	12.3864	13.1378	12.7996	15.6441	14.3687	13.9358	14.7567	11.1541	13.991	14.2046	14.0702	14.1647	14.309	13.2847	13.0928	12.0702	12.569
	0.401408	0.49656	A0A494C017;C9JJV6;C9JZL8;A0A499FIY8;C9JC07;Q96S97	A0A494C017;C9JJV6;C9JZL8;A0A499FIY8;C9JC07;Q96S97	Myeloid-associated differentiation marker	MYADM	1	0	1	1	1	8.2	8.2	8.2	13.153	0.0097656	6.4896	296860	8	11.3285	10.1552	13.5217	12.7652	13.1732	11.9524	12.2511	14.9844	15.118	13.9372	12.3199	11.8957	12.1624	11.9902	12.2412	11.3385	12.0008	12.8402	12.2556	12.7581	13.1937
	1.30655	1.03281	A0A494C060;F6THM6;A0A494C1A0;P35609	A0A494C060;F6THM6;A0A494C1A0;P35609	Alpha-actinin-2	ACTN2	0	1	2	2	2	4.6	4.6	4.6	67.815	0	12.619	75611	3	12.6842	11.3721	13.84	13.4769	13.0171	13.9604	11.6554	14.6185	14.2528	14.4893	14.1972	12.8081	13.0901	10.8741	11.6668	10.8161	12.5371	13.4043	12.0746	12.2509	12.8681
	0.48513	0.68001	A0A494C175;A0A0S2Z4A4;P58340;A0A494C127;A0A494C1S3;A0A494C1P6	A0A494C175;A0A0S2Z4A4;P58340;A0A494C127;A0A494C1S3;A0A494C1P6	Myeloid leukemia factor 1	MLF1	3	0	3	3	3	17	17	17	24.988	0	23.467	660530	13	11.2705	11.6024	13.9553	12.7322	12.0877	14.1849	13.6282	15.6011	15.1478	15.2324	13.6811	12.9297	14.2458	11.4295	10.7336	11.6196	14.3313	12.7903	14.087	12.3055	12.5475
	0.985873	1.05799	A0A590UK44;A0A590UJW8;A0A590UJQ1;Q96J02;Q9H0M0;H0YBS9;H0YBA4;A0A590UK95;O00308	A0A590UK44;A0A590UJW8;A0A590UJQ1;Q96J02;Q9H0M0	E3 ubiquitin-protein ligase Itchy homolog;NEDD4-like E3 ubiquitin-protein ligase WWP1	ITCH;WWP1	1	0	3	3	3	4.5	4.5	4.5	88.805	0	17.535	93164	5	10.8513	11.5006	13.4502	11.7424	13.3277	14.4316	13.4262	15.15	15.4513	13.7857	14.1756	12.0662	12.4007	12.0058	13.0506	11.2812	12.1898	12.626	11.6693	10.9037	13.6824
	1.0461	0.838003	A0A5F9W493;E7ETM0	A0A5F9W493;E7ETM0		CSNK1A1	1	0	10	1	0	36	5.9	0	40.589	0	16.929	251550	6	12.1045	12.0494	12.6749	13.4954	11.9506	13.8113	12.5713	15.18	14.7843	13.5539	13.7071	11.7137	12.1376	11.3719	12.0807	12.5024	12.7597	12.6856	13.2959	11.2568	12.9891
	1.49884	1.03007	A0A5H1ZRQ3;P01834	A0A5H1ZRQ3;P01834	Ig kappa chain C region	IGKC	1	0	1	1	1	15.9	15.9	15.9	11.609	0.0020747	6.9277	27060	1	11.5906	13.1043	13.4149	12.3295	12.4987	12.8793	12.7437	14.9006	15.509	13.7659	14.1363	11.7049	11.6725	11.8259	11.6381	12.0383	12.7296	12.3997	12.2443	12.5591	12.5927
	1.6904	1.11827	A0A669KB62;A0A669KB05;C9JZR2;O60716	A0A669KB62;A0A669KB05;C9JZR2;O60716	Catenin delta-1	CTNND1	0	1	1	1	1	1.7	1.7	1.7	99.077	0	8.1246	267430	3	11.9244	11.6576	13.2136	12.9542	12.7368	13.627	12.4302	14.9285	14.1954	13.1304	14.0545	10.8623	13.3199	11.0634	11.8881	12.1368	12.6182	11.5236	12.5137	11.5215	11.0179
	0.863851	-1.28613	A6NNI4;A0A2R8Y478;G8JLH6;P21926;A0A087WU13	A6NNI4;A0A2R8Y478;G8JLH6;P21926	Tetraspanin;CD9 antigen	CD9	6	1	4	4	4	29.6	29.6	29.6	17.764	0	190.26	5030700	27	11.4394	15.9853	13.1916	13.2777	12.6572	13.0243	12.4575	14.8841	15.2902	13.7736	14.6017	11.5815	16.2072	16.21	16.004	15.9134	11.8781	16.0283	16.6153	12.4937	12.4326
	0.758594	0.792371	A6NP16;E7ERM3;Q4VCS5	A6NP16;E7ERM3;Q4VCS5	Angiomotin	AMOT	0	1	2	2	2	4.9	4.9	4.9	68.392	0	17.259	670670	6	11.6344	10.6316	12.9728	13.1256	12.1908	13.0555	13.2937	15.2581	15.1816	13.9995	14.1799	12.3595	11.5834	11.6574	10.8655	12.1381	12.6991	12.7059	12.7716	13.0499	12.7421
	1.35259	1.3269	A8MUA9;A8MU27;Q6EEV6;P61956;P55854	A8MUA9;A8MU27;Q6EEV6;P61956;P55854	Small ubiquitin-related modifier 4;Small ubiquitin-related modifier 2;Small ubiquitin-related modifier 3	SUMO3;SUMO4;SUMO2	1	0	1	1	1	8.9	8.9	8.9	15.317	0	7.9784	835930	8	11.9699	11.4919	13.587	13.8018	12.0328	12.2212	12.728	15.2835	15.7189	13.4453	13.7151	10.9938	12.1778	10.6945	11.8177	11.6377	10.5822	12.0923	11.2003	13.8048	12.8856
	1.02694	0.861954	B0YJC4;P08670;A0A1B0GTT5;B0YJC5	B0YJC4;P08670;A0A1B0GTT5;B0YJC5	Vimentin	VIM	0	1	2	2	2	4.9	4.9	4.9	49.653	0	11.132	33248	2	11.7585	11.3841	12.9289	12.9711	11.9192	14.0196	12.132	14.3779	15.0774	13.1743	13.8362	11.2383	11.3146	12.7567	11.4549	11.0583	12.3182	12.6655	11.9355	12.699	12.6085
	1.04504	0.869983	B1AK85;P47756;A0A6I8PRV6;A0A6I8PIN8;B1AK87;B1AK88	B1AK85;P47756;A0A6I8PRV6;A0A6I8PIN8;B1AK87;B1AK88	F-actin-capping protein subunit beta	CAPZB	1	0	2	2	2	8.5	8.5	8.5	29.265	0	12.887	148680	7	11.1987	12.097	12.4383	12.7676	12.69	13.1011	12.9249	15.5133	14.6956	13.7085	14.2814	11.361	12.7758	12.1977	12.6827	10.814	11.9894	11.9228	12.3126	12.0648	12.8368
	0.636068	0.720359	B1ANR0;Q13310;H0Y5F5;B1ANR1;H0YEU6;H0YCC8	B1ANR0;Q13310;H0Y5F5;B1ANR1	Polyadenylate-binding protein;Polyadenylate-binding protein 4	PABPC4	3	0	11	4	4	20.2	9.3	9.3	67.97	0	24.709	1093200	13	11.5638	11.3383	13.3481	12.7417	13.6251	13.9204	12.0845	16.1038	14.4685	12.8368	14.4648	11.0397	13.5159	11.2366	13.4611	13.4493	12.6474	11.6765	12.302	11.7531	12.6689
	0.947038	1.06383	B4DN67;Q96J84	B4DN67;Q96J84	Kin of IRRE-like protein 1	KIRREL	0	1	1	1	1	2.7	2.7	2.7	72.721	0	11.567	20163	1	10.4448	11.4988	11.8481	13.6804	12.7074	14.1696	12.3784	15.6758	14.9456	14.6099	13.8582	11.5818	11.7697	11.349	10.7478	11.3658	12.7236	11.4254	12.7035	12.3903	13.2993
	1.11452	1.21706	B4DUR8;P49368	B4DUR8;P49368	T-complex protein 1 subunit gamma	CCT3	0	1	2	2	2	4.6	4.6	4.6	55.674	0	13.557	244810	6	11.6985	9.828	14.3149	13.6519	12.3321	14.0308	13.0325	14.9241	15.208	13.8305	14.0311	11.9656	12.0866	10.5091	12.6524	11.4513	11.777	13.6617	12.2398	11.3992	12.2901
	0.382144	0.532001	B5MDF5;P62826;F5H018;J3KQE5;B4DV51;A0A087X0W0;H0YFC6	B5MDF5;P62826;F5H018;J3KQE5;B4DV51	GTP-binding nuclear protein Ran	RAN	3	0	5	5	5	25.3	25.3	25.3	26.224	0	31.399	638890	14	11.157	11.1488	13.4081	12.5016	13.0096	14.3021	12.0254	15.4112	14.4351	13.3031	13.7013	11.146	13.7708	11.7648	13.6247	10.6996	13.1028	12.0998	11.8109	14.1734	11.5642
	0.570769	0.597588	B7Z248;B7Z613;Q13491	B7Z248;B7Z613;Q13491	Neuronal membrane glycoprotein M6-b	GPM6B	1	0	1	1	1	7.3	7.3	7.3	19.942	0	8.1874	106730	3	11.7434	13.335	13.4465	11.7663	12.6299	13.526	11.532	15.2398	15.3524	13.8037	14.0473	11.2822	11.6232	12.1063	12.3816	13.4482	12.3915	13.1643	11.9752	13.3697	12.733
	0.148609	0.253132	B7ZKQ9;Q8WTV0;F5H4X0;F5H5E8	B7ZKQ9;Q8WTV0;F5H4X0	Scavenger receptor class B member 1	SCARB1	1	0	4	4	4	7.7	7.7	7.7	53.847	0	25.045	322660	5	11.5654	10.4215	12.4168	12.5945	11.9645	12.8442	13.1725	15.8711	14.9354	13.188	13.9688	11.4649	12.0371	11.9669	11.202	12.1983	13.2053	11.7774	12.5914	14.8415	13.6878
+	2.93958	1.10519	B8ZZX6;Q658P3	B8ZZX6;Q658P3	Metalloreductase STEAP3	STEAP3	0	1	1	1	1	2.4	2.4	2.4	50.628	0.003992	6.6061	125970	2	12.2656	13.2679	14.0188	13.2152	12.2601	13.4668	12.9167	14.4902	13.8736	13.9163	13.9661	12.5062	11.8427	11.9135	11.7896	12.0179	12.8622	12.5131	12.1694	12.2111	12.5085
	1.2031	1.71891	C9J0A7;Q9UQN3;A0A087WW88	C9J0A7;Q9UQN3	Charged multivesicular body protein 2b	CHMP2B	4	3	7	7	7	25.7	25.7	25.7	20.772	0	124.72	8451700	32	17.7653	17.32	13.6796	13.7634	16.3486	13.6033	12.923	15.2619	15.2713	13.9743	13.5473	11.3942	12.0402	15.1496	15.1219	9.71362	14.6406	12.7348	12.866	15.512	12.6873
	1.19817	0.926829	C9J0E4;P01040	C9J0E4;P01040	Cystatin-A;Cystatin-A, N-terminally processed	CSTA	1	0	1	1	1	19	19	19	7.0861	0	8.976	133730	2	11.6541	11.2694	13.7068	13.4158	13.6074	13.4189	13.7453	15.3307	14.3408	14.1022	13.0924	11.5568	13.4933	13.257	12.0303	11.6249	11.7646	12.5787	12.4547	12.4555	12.4888
	1.14811	-1.33155	C9J2C4;A0A0J9YX62;O75190;C9JDR7;C9JDX6;F8WCZ4;C9J2P2;E9PH18;C9JB42;C9JN01;C9JRD2;C9JXB9;Q8WWF6;Q8NHS0;P25686	C9J2C4;A0A0J9YX62;O75190;C9JDR7;C9JDX6;F8WCZ4;C9J2P2;E9PH18;C9JB42	DnaJ homolog subfamily B member 6	DNAJB6	6	0	4	4	4	25.4	25.4	25.4	25.377	0	27.351	1668400	22	10.7267	10.9201	12.5614	12.9202	13.0885	12.981	12.7203	15.2368	14.7074	14.2362	13.3637	11.9588	15.1825	15.0343	11.6577	14.9619	15.2309	15.0814	15.1315	12.0164	13.5498
	1.70762	1.14655	C9J6P4;Q7Z2W4;H7C5K1	C9J6P4;Q7Z2W4;H7C5K1	Zinc finger CCCH-type antiviral protein 1	ZC3HAV1	1	0	2	2	2	3.2	3.2	3.2	114.08	0	13.039	91843	3	11.7964	11.3938	13.3682	13.0538	12.876	12.5369	13.0298	14.7519	14.6231	14.5198	13.871	11.3483	11.9795	10.9605	11.7495	10.87	12.0531	11.7406	12.0468	13.1053	12.6053
	0.0399131	0.0715773	C9JB90;C9JU14;J3KR73;Q9NRW1;P20340;Q14964	C9JB90;C9JU14;J3KR73;Q9NRW1;P20340;Q14964	Ras-related protein Rab-6B;Ras-related protein Rab-6A;Ras-related protein Rab-39A	RAB6B;RAB6A;RAB39A	1	0	1	1	1	22.4	22.4	22.4	5.8575	0	77.758	2981400	13	10.51	11.2245	14.0106	12.4342	13.1827	12.6673	12.7474	14.8231	14.9793	14.3159	14.3413	10.7949	12.5844	12.7295	11.629	12.047	13.0476	12.3789	13.6873	15.6219	12.2093
	1.33476	1.30624	C9JEU5;C9JC84;P02679	C9JEU5;C9JC84;P02679	Fibrinogen gamma chain	FGG	0	1	3	3	3	11.7	11.7	11.7	50.322	0	19.433	331220	7	12.2872	10.7036	14.219	13.7042	12.779	12.7396	12.8686	16.0318	15.0131	14.608	13.2028	11.1823	11.8452	11.5976	10.7856	11.6601	12.4865	13.9699	12.1685	12.5577	11.519
	0.545816	0.706554	C9JEV0;P25311	C9JEV0;P25311	Zinc-alpha-2-glycoprotein	AZGP1	1	0	3	3	3	17.6	17.6	17.6	26.353	0	17.936	124210	6	10.623	9.9706	12.2894	12.9101	12.1433	14.3687	12.6079	15.0146	14.8136	13.6869	14.1207	12.0124	12.9317	11.765	12.3009	10.2669	12.2619	12.18	12.5616	11.9759	12.1382
+	3.56176	2.02564	C9JZN1;C9JIS1;C9JXA5;P62879;E7EP32;Q9HAV0;C9JD14;H7C5J5;F5H8J8;F5H100;F5H0S8;E9PCP0;P16520	C9JZN1;C9JIS1;C9JXA5;P62879;E7EP32;Q9HAV0	Guanine nucleotide-binding protein G(I)/G(S)/G(T) subunit beta-2;Guanine nucleotide-binding protein subunit beta-4	GNB2;GNB4	0	3	6	4	4	47.4	33.6	33.6	17.032	0	37.452	1131100	8	14.6213	11.649	14.7248	14.275	14.5512	13.1732	13.2253	14.7944	14.4163	13.5749	14.0274	12.5086	11.6924	11.8595	10.7655	11.1287	12.1107	12.7048	12.2294	11.4234	13.2852
	1.4319	1.57732	C9K0L8;K7ERZ0;K7EN66	C9K0L8;K7ERZ0;K7EN66		CNP	0	1	18	1	1	92.4	20.1	20.1	16.539	0	91.771	2134900	6	10.9794	16.8117	13.3389	13.5296	11.423	12.9525	12.3989	15.479	15.6487	14.0477	13.6397	11.2051	11.735	12.5221	10.9445	12.2264	11.6727	12.3922	12.2438	13.0239	11.6051
	1.07773	0.79582	D6RBF1;C9J6J8;E3W990;E7EMC7;Q13501	D6RBF1;C9J6J8;E3W990;E7EMC7;Q13501	Sequestosome-1	SQSTM1	0	1	2	2	2	50.7	50.7	50.7	7.4094	0	11.647	122540	2	11.9834	11.5604	13.1202	12.7468	13.3624	11.9668	12.5426	14.1892	14.7249	14.7201	13.6001	11.5249	13.029	11.544	11.2609	12.2536	11.1308	11.6176	13.1093	12.5555	12.5336
	1.76177	1.45904	D6RDA3;D6RHC7;D6RHX8;F8W9W2;P43250	D6RDA3;D6RHC7;D6RHX8;F8W9W2;P43250	G protein-coupled receptor kinase 6	GRK6	0	1	1	1	1	15.5	15.5	15.5	14.986	0.0021097	7.2007	76140	1	12.3617	11.4202	12.9171	13.8964	11.8416	12.211	12.5031	15.6538	14.4984	14.5181	15.4086	11.8655	11.1595	12.3277	10.0125	10.7	12.8949	12.4179	11.2669	11.8091	11.5835
	2.14589	1.22674	D6RG08;E9PB77;E7EMF1;E7ESP4;P17301	D6RG08;E9PB77;E7EMF1;E7ESP4;P17301	Integrin alpha-2	ITGA2	0	1	2	2	2	21.7	21.7	21.7	18.71	0	15.871	60236	3	12.7329	11.5628	13.665	13.8498	12.4479	13.8882	13.5016	15.1302	14.3793	13.5545	13.4188	11.241	12.9	11.4666	11.4952	11.923	12.612	12.4827	12.3143	12.8168	12.1065
	0.636524	0.642132	E5RIP4;Q15043;E5RFZ8;E5RGA7;E5RJ40;E5RJG5	E5RIP4;Q15043;E5RFZ8;E5RGA7;E5RJ40;E5RJG5	Zinc transporter ZIP14	SLC39A14	0	1	2	2	2	21.3	21.3	21.3	17	0	14.153	498450	9	10.6984	13.8622	12.4875	12.8703	12.529	12.9248	12.0242	14.3139	15.1385	13.7495	14.8856	11.2149	13.9442	12.1746	11.9206	11.9425	12.3843	12.0873	11.6753	11.5037	13.437
	1.98362	1.50424	E5RIU6;A0A087WZZ9;A0A024QZP7;P06493;F8VXD2;A0A2R8YEB7;K7ELV5;F8VYH9;F8VZZ0;F8VTV8;F8VWX7;F8VZ51;K7EJ83;E7ESI2;A0A2R8Y644;H0YAZ9;Q9BVE2;E7EUK8;G3V5T9;E5RGN0;A0A087X209;A0A087WZU2;A0A2R8YD28;F5H6Z0;A0A2R8YF61;A0A2R8Y7W5;J3QSD7;A0A2R8Y4Z0;Q00535;P24941;P11802;Q00526;Q00534;P50750;Q96Q40;O94921;Q07002;Q00536;Q00537;Q9NYV4;Q14004	E5RIU6;A0A087WZZ9;A0A024QZP7;P06493;F8VXD2;A0A2R8YEB7;K7ELV5;F8VYH9;F8VZZ0;F8VTV8;F8VWX7;F8VZ51;K7EJ83;E7ESI2;A0A2R8Y644;H0YAZ9;Q9BVE2;E7EUK8;G3V5T9;E5RGN0;A0A087X209;A0A087WZU2;A0A2R8YD28;F5H6Z0;A0A2R8YF61;A0A2R8Y7W5;J3QSD7;A0A2R8Y4Z0;Q00535;P24941;P11802;Q00526;Q00534;P50750;Q96Q40;O94921;Q07002;Q00536;Q00537;Q9NYV4;Q14004	Cyclin-dependent kinase 1;Cyclin-dependent-like kinase 5;Cyclin-dependent kinase 2;Cyclin-dependent kinase 4;Cyclin-dependent kinase 3;Cyclin-dependent kinase 6;Cyclin-dependent kinase 9;Cyclin-dependent kinase 15;Cyclin-dependent kinase 14;Cyclin-dependent kinase 18;Cyclin-dependent kinase 16;Cyclin-dependent kinase 17;Cyclin-dependent kinase 12;Cyclin-dependent kinase 13	CDK1;CDC2;CDK4;CDK3;CDK2;CDK16;CDK13;CDK14;CDK17;CDK12;CDK5;CDK6;CDK9;CDK15;CDK18	1	0	2	2	2	12.7	12.7	12.7	21.738	0	11.784	646120	7	11.284	12.2257	14.2301	13.9544	13.173	14.3555	13.5774	14.9159	15.009	14.8673	14.5826	10.8623	13.1982	10.6916	12.118	11.7141	12.5382	13.4018	12.4564	10.7861	12.2826
	0.958991	0.822423	E5RJ10;E5RHB8;E5RJX6;E5RG91;Q8NEZ2	E5RJ10;E5RHB8;E5RJX6;E5RG91;Q8NEZ2	Vacuolar protein sorting-associated protein 37A	VPS37A	1	0	1	1	1	37.7	37.7	37.7	5.9598	0	8.6831	28345	1	11.2501	11.0327	12.7758	13.3034	12.4512	12.8336	12.7542	14.4102	15.0805	13.8342	14.6154	11.8254	11.4508	10.9741	11.5883	12.2366	11.9901	12.5335	13.0819	12.0489	12.5857
	1.50953	1.05826	E5RJ41;E5RIB1;G3XAM7;P35221	E5RJ41;E5RIB1;G3XAM7;P35221	Catenin alpha-1	CTNNA1	0	1	1	1	1	8.1	8.1	8.1	17.501	0.0040323	6.7178	60758	1	12.0996	12.0095	12.8611	13.4067	12.0926	13.6695	11.8665	15.3567	14.9223	14.06	13.7936	12.1812	12.2327	11.7483	11.4519	12.2507	12.0818	12.0322	12.292	12.5228	12.1479
	1.16431	0.900927	E7EMC6;E5RK69;P08133;E5RFF0;H0YC77;E5RIU8;E5RJR0;E5RJF5;E5RI05;E5RK63	E7EMC6;E5RK69;P08133	Annexin;Annexin A6	ANXA6	0	1	5	5	5	17.3	17.3	17.3	36.962	0	30.729	746480	4	15.0239	11.4332	13.4583	12.5723	12.8006	13.1339	12.0342	14.9838	14.748	15.1965	14.4526	11.847	12.6573	12.81	12.3394	11.5817	12.325	12.3603	12.2321	13.141	12.6331
+	4.32394	2.14264	E7EQR4;P15311	E7EQR4;P15311	Ezrin	EZR	0	2	8	4	4	15	8.4	8.4	69.371	0	51.416	1032500	9	14.8837	14.9572	13.0226	13.1426	12.1644	13.3586	14.1384	15.3504	14.4062	13.553	13.6528	11.3906	11.7929	11.7793	11.7686	10.7723	11.572	11.9667	12.214	11.814	12.4605
+	3.28325	-1.90372	E9PC69;Q7KZI7;E7ETY4;B4DIB3;A0A087X0I6;Q9P0L2;F5H4F6;P27448;F5H6N2;H0YNV4;J3KNR0;K7EK17;K7EKG8;F5H4J8;H0YKJ3;H0YIY6;Q96L34	E9PC69;Q7KZI7;E7ETY4	Serine/threonine-protein kinase MARK2	MARK2	9	2	21	21	21	30.8	30.8	30.8	86.69	0	263.26	5899100	114	16.3998	15.722	13.2423	13.2871	13.0952	13.8023	12.7603	15.0054	14.9511	14.4777	14.3701	11.251	16.2532	16.349	16.3835	16.3417	16.228	15.994	16.0556	16.1014	15.6924
	0.363528	0.46426	E9PEZ5;A0A1B0GUL6;Q9UPP5	E9PEZ5;A0A1B0GUL6;Q9UPP5	Uncharacterized protein KIAA1107	KIAA1107	1	0	2	2	2	1.9	1.9	1.9	155.67	0	11.647	559240	2	10.9749	11.0544	13.0823	13.4384	11.9504	13.8502	12.2517	14.5998	14.7038	14.436	13.9959	11.0639	12.74	10.8558	14.5783	12.151	12.0462	12.0065	11.9315	13.0187	12.3995
	1.84343	1.17907	E9PII3;E9PK52;E9PHY5;O43491;E9PJP4;E9PQN0;E9PRG1;E9PIG0;E9PQD2;A0A2R8Y5B3	E9PII3;E9PK52;E9PHY5;O43491;E9PJP4;E9PQN0;E9PRG1;E9PIG0;E9PQD2;A0A2R8Y5B3	Band 4.1-like protein 2	EPB41L2	0	1	2	2	2	4.1	4.1	4.1	79.256	0	12.486	276470	2	14.2221	12.326	13.3297	11.775	12.8952	13.973	12.4437	14.8008	14.5623	13.5306	13.9932	11.7282	12.0859	11.9398	11.3382	11.3299	12.3639	12.4373	12.3285	12.1718	13.7208
+	2.55098	-1.33876	E9PJK1;E9PRJ8;H0YDL9;H0YDJ9;E9PIF1;A6NMH8;P60033;E9PM31;H0YEE2	E9PJK1;E9PRJ8;H0YDL9;H0YDJ9;E9PIF1;A6NMH8;P60033	Tetraspanin;CD81 antigen	CD81	9	7	5	5	5	41.2	41.2	41.2	17.963	0	323.31	31100000	120	17.6356	17.9814	17.9484	17.8062	16.7947	17.4043	17.8115	15.5893	14.9315	13.9488	14.0103	12.568	18.4465	18.7691	18.8669	18.3828	18.3663	18.2223	18.2983	18.4027	18.197
	0.0863888	-0.122803	E9PLD0;E7END7;Q9H0U4;Q92928;P62820;A0A2R8YDI9;H0YLJ8;H0YL94;G3V196;A0A2R8YFB8;P59190	E9PLD0;E7END7;Q9H0U4;Q92928;P62820	Ras-related protein Rab-1B;Putative Ras-related protein Rab-1C;Ras-related protein Rab-1A	RAB1B;RAB1A;RAB1C	4	0	3	2	2	20.7	14.2	14.2	18.483	0	30.595	607020	24	11.3792	11.1748	12.5341	13.6958	12.4917	13.2572	12.2118	15.1843	14.8148	12.479	14.0659	12.051	13.1518	13.8245	13.8678	13.3993	13.5474	12.3283	11.8068	12.3175	13.6056
	1.92669	-1.98458	E9PNW4;A0A2U3TZL5;P13987;H0YET2	E9PNW4;A0A2U3TZL5;P13987;H0YET2	CD59 glycoprotein	CD59	7	0	3	3	3	23.1	23.1	23.1	11.985	0	25.574	2816400	30	10.453	10.6665	13.2255	13.6294	12.9481	13.0178	12.2755	14.5381	15.5534	14.2563	14.4307	11.4142	15.4673	15.4244	15.6325	15.385	15.6761	12.8835	15.6721	15.6311	12.3965
+	2.59115	1.46205	E9PPJ0;Q13435	E9PPJ0;Q13435	Splicing factor 3B subunit 2	SF3B2	0	1	1	1	1	1.7	1.7	1.7	98.169	0.0021368	7.4653	135450	1	11.6659	13.3725	13.1167	13.969	14.0048	13.2941	12.5899	14.1885	14.4752	13.107	14.5245	11.61	11.5769	12.4301	11.3346	10.8944	13.5132	12.1184	10.9251	12.1003	12.625
	0.975096	1.10794	E9PRJ3;K4DIA7;E9PMR4;P48509	E9PRJ3;K4DIA7;E9PMR4;P48509	Tetraspanin;CD151 antigen	CD151	1	0	1	1	1	5.1	5.1	5.1	19.792	0.0021231	7.3637	568570	4	10.209	12.6221	13.2384	13.8445	12.6067	14.2247	12.021	15.5532	14.0258	14.3588	14.1961	11.5199	12.4442	10.419	11.0368	11.7397	12.3474	11.931	11.4766	14.6935	12.2855
	0.0101722	0.036076	F5GZ56;Q9UG01	F5GZ56;Q9UG01	Intraflagellar transport protein 172 homolog	IFT172	1	0	1	1	1	2.5	2.5	2.5	57.357	0	8.8644	38733000	8	11.732	10.5078	12.8477	12.8948	12.2593	13.2079	12.8642	15.3015	15.8348	13.7228	14.1805	11.5137	11.8409	12.0664	10.6966	10.3323	12.621	12.9991	12.1768	21.4038	12.9881
	0.814834	0.844203	F5H157;Q15286	F5H157;Q15286	Ras-related protein Rab-35	RAB35	1	0	3	3	3	23.2	23.2	23.2	21.214	0	21.533	812850	11	12.4261	10.897	13.6866	12.7427	12.0521	12.7084	13.792	14.6416	15.2604	14.0226	14.9987	12.285	12.3412	12.9954	14.3893	11.2614	11.3221	12.4638	12.7175	11.3486	11.7696
[truncated: 281 more rows]
